# Supplementary material for: Evidence of Fire Use by Homo erectus pekinensis: An XRD Study of Archaeological Bones From Zhoukoudian Locality 1, China
Source: Frontiers journal article supplement (doi:10.3389/feart.2021.811319), 2022-01-19
Supplement: Data_Sheet_1.XLSX [file Data_Sheet_1.XLSX]

## Sheet: Sheet1
12Z1-0413		12Z1-862-2		12Z1-1510		12Z1-1873		12Z1-2095		14Z1-0143		14Z1-0161		14Z1-0163		14Z1-0273		14Z1-0429		14Z1-0461		14Z1-0765		14Z1-1083		14Z1-1548		14Z1-1571
2Theta	Intensiity	2Theta	Intensiity	2Theta	Intensiity	2Theta	Intensiity	2Theta	Intensiity	2Theta	Intensiity	2Theta	Intensiity	2Theta	Intensiity	2Theta	Intensiity	2Theta	Intensiity	2Theta	Intensiity	2Theta	Intensiity	2Theta	Intensiity	2Theta	Intensiity	2Theta	Intensiity
3.0001	452	3.0001	420	3.0001	408	3.0001	549	3.0001	432	3.0001	452	3.0001	397	3.0001	349	3.0001	501	3.0001	455	3.0001	391	3.0001	412	3.0001	437	3.0001	427	3.0001	440
3.01959	433	3.01959	413	3.01959	402	3.01959	466	3.01959	423	3.01959	410	3.01959	397	3.01959	359	3.01959	422	3.01959	438	3.01959	393	3.01959	430	3.01959	404	3.01959	385	3.01959	448
3.03908	435	3.03908	382	3.03908	401	3.03908	456	3.03908	366	3.03908	386	3.03908	403	3.03908	378	3.03908	430	3.03908	452	3.03908	405	3.03908	402	3.03908	429	3.03908	417	3.03908	478
3.05857	398	3.05857	425	3.05857	392	3.05857	489	3.05857	384	3.05857	408	3.05857	397	3.05857	335	3.05857	429	3.05857	414	3.05857	377	3.05857	383	3.05857	421	3.05857	384	3.05857	452
3.07806	389	3.07806	374	3.07806	345	3.07806	419	3.07806	398	3.07806	359	3.07806	390	3.07806	346	3.07806	411	3.07806	439	3.07806	366	3.07806	377	3.07806	419	3.07806	399	3.07806	422
3.09755	362	3.09755	373	3.09755	351	3.09755	508	3.09755	383	3.09755	382	3.09755	357	3.09755	336	3.09755	409	3.09755	409	3.09755	376	3.09755	356	3.09755	364	3.09755	383	3.09755	446
3.11704	359	3.11704	361	3.11704	351	3.11704	493	3.11704	387	3.11704	397	3.11704	350	3.11704	336	3.11704	417	3.11704	412	3.11704	383	3.11704	324	3.11704	363	3.11704	356	3.11704	427
3.13653	378	3.13653	380	3.13653	369	3.13653	434	3.13653	402	3.13653	347	3.13653	363	3.13653	308	3.13653	370	3.13653	408	3.13653	366	3.13653	372	3.13653	403	3.13653	379	3.13653	419
3.15602	387	3.15602	363	3.15602	366	3.15602	434	3.15602	383	3.15602	366	3.15602	350	3.15602	365	3.15602	416	3.15602	376	3.15602	328	3.15602	342	3.15602	437	3.15602	348	3.15602	370
3.1755	383	3.1755	363	3.1755	334	3.1755	428	3.1755	356	3.1755	350	3.1755	340	3.1755	328	3.1755	379	3.1755	391	3.1755	341	3.1755	305	3.1755	400	3.1755	374	3.1755	381
3.19499	366	3.19499	342	3.19499	340	3.19499	424	3.19499	340	3.19499	348	3.19499	340	3.19499	305	3.19499	370	3.19499	387	3.19499	337	3.19499	335	3.19499	398	3.19499	351	3.19499	366
3.21448	377	3.21448	327	3.21448	348	3.21448	416	3.21448	374	3.21448	317	3.21448	343	3.21448	321	3.21448	375	3.21448	337	3.21448	331	3.21448	352	3.21448	393	3.21448	352	3.21448	389
3.23397	367	3.23397	341	3.23397	352	3.23397	393	3.23397	342	3.23397	311	3.23397	354	3.23397	288	3.23397	338	3.23397	348	3.23397	348	3.23397	344	3.23397	343	3.23397	362	3.23397	375
3.25346	316	3.25346	371	3.25346	339	3.25346	422	3.25346	334	3.25346	299	3.25346	323	3.25346	315	3.25346	400	3.25346	372	3.25346	340	3.25346	326	3.25346	360	3.25346	325	3.25346	398
3.27295	352	3.27295	320	3.27295	322	3.27295	431	3.27295	351	3.27295	319	3.27295	316	3.27295	269	3.27295	359	3.27295	381	3.27295	328	3.27295	308	3.27295	328	3.27295	344	3.27295	358
3.29244	369	3.29244	317	3.29244	310	3.29244	392	3.29244	322	3.29244	350	3.29244	299	3.29244	284	3.29244	352	3.29244	337	3.29244	307	3.29244	313	3.29244	363	3.29244	318	3.29244	383
3.31193	327	3.31193	273	3.31193	332	3.31193	388	3.31193	327	3.31193	324	3.31193	325	3.31193	291	3.31193	360	3.31193	319	3.31193	317	3.31193	296	3.31193	337	3.31193	308	3.31193	355
3.33142	318	3.33142	307	3.33142	302	3.33142	354	3.33142	291	3.33142	292	3.33142	324	3.33142	236	3.33142	319	3.33142	329	3.33142	308	3.33142	320	3.33142	326	3.33142	316	3.33142	353
3.35091	357	3.35091	302	3.35091	296	3.35091	357	3.35091	309	3.35091	292	3.35091	315	3.35091	249	3.35091	332	3.35091	305	3.35091	283	3.35091	325	3.35091	325	3.35091	310	3.35091	368
3.3704	324	3.3704	322	3.3704	293	3.3704	380	3.3704	293	3.3704	267	3.3704	296	3.3704	283	3.3704	304	3.3704	328	3.3704	309	3.3704	297	3.3704	295	3.3704	302	3.3704	358
3.38989	321	3.38989	262	3.38989	272	3.38989	344	3.38989	282	3.38989	303	3.38989	305	3.38989	252	3.38989	294	3.38989	316	3.38989	275	3.38989	264	3.38989	316	3.38989	307	3.38989	353
3.40938	304	3.40938	293	3.40938	306	3.40938	389	3.40938	290	3.40938	248	3.40938	285	3.40938	272	3.40938	309	3.40938	313	3.40938	281	3.40938	274	3.40938	307	3.40938	309	3.40938	358
3.42887	288	3.42887	293	3.42887	294	3.42887	349	3.42887	275	3.42887	276	3.42887	279	3.42887	244	3.42887	311	3.42887	326	3.42887	252	3.42887	260	3.42887	291	3.42887	283	3.42887	318
3.44836	299	3.44836	289	3.44836	252	3.44836	336	3.44836	309	3.44836	268	3.44836	282	3.44836	234	3.44836	291	3.44836	285	3.44836	307	3.44836	248	3.44836	297	3.44836	275	3.44836	292
3.46785	300	3.46785	248	3.46785	277	3.46785	342	3.46785	268	3.46785	282	3.46785	256	3.46785	265	3.46785	293	3.46785	267	3.46785	259	3.46785	262	3.46785	302	3.46785	229	3.46785	314
3.48733	275	3.48733	269	3.48733	273	3.48733	317	3.48733	276	3.48733	251	3.48733	258	3.48733	250	3.48733	287	3.48733	284	3.48733	272	3.48733	269	3.48733	294	3.48733	267	3.48733	302
3.50682	267	3.50682	244	3.50682	218	3.50682	348	3.50682	302	3.50682	250	3.50682	240	3.50682	215	3.50682	279	3.50682	262	3.50682	285	3.50682	277	3.50682	283	3.50682	274	3.50682	304
3.52631	263	3.52631	258	3.52631	227	3.52631	294	3.52631	259	3.52631	267	3.52631	241	3.52631	240	3.52631	277	3.52631	286	3.52631	262	3.52631	251	3.52631	259	3.52631	278	3.52631	309
3.5458	254	3.5458	274	3.5458	247	3.5458	306	3.5458	257	3.5458	269	3.5458	222	3.5458	230	3.5458	267	3.5458	276	3.5458	224	3.5458	243	3.5458	256	3.5458	247	3.5458	285
3.56529	299	3.56529	265	3.56529	246	3.56529	306	3.56529	230	3.56529	255	3.56529	217	3.56529	249	3.56529	289	3.56529	266	3.56529	211	3.56529	244	3.56529	253	3.56529	264	3.56529	272
3.58478	269	3.58478	241	3.58478	240	3.58478	334	3.58478	243	3.58478	228	3.58478	243	3.58478	202	3.58478	236	3.58478	259	3.58478	263	3.58478	252	3.58478	252	3.58478	242	3.58478	258
3.60427	248	3.60427	229	3.60427	221	3.60427	279	3.60427	221	3.60427	261	3.60427	227	3.60427	193	3.60427	260	3.60427	264	3.60427	201	3.60427	205	3.60427	249	3.60427	228	3.60427	241
3.62376	259	3.62376	224	3.62376	234	3.62376	281	3.62376	225	3.62376	237	3.62376	239	3.62376	194	3.62376	264	3.62376	256	3.62376	221	3.62376	253	3.62376	231	3.62376	216	3.62376	239
3.64325	250	3.64325	226	3.64325	217	3.64325	267	3.64325	224	3.64325	231	3.64325	235	3.64325	217	3.64325	255	3.64325	247	3.64325	234	3.64325	253	3.64325	269	3.64325	227	3.64325	265
3.66274	271	3.66274	234	3.66274	239	3.66274	272	3.66274	215	3.66274	230	3.66274	215	3.66274	208	3.66274	272	3.66274	228	3.66274	199	3.66274	218	3.66274	245	3.66274	218	3.66274	254
3.68223	219	3.68223	206	3.68223	230	3.68223	301	3.68223	226	3.68223	213	3.68223	204	3.68223	208	3.68223	227	3.68223	227	3.68223	217	3.68223	198	3.68223	242	3.68223	207	3.68223	263
3.70172	239	3.70172	213	3.70172	205	3.70172	268	3.70172	202	3.70172	185	3.70172	224	3.70172	224	3.70172	260	3.70172	213	3.70172	210	3.70172	181	3.70172	233	3.70172	219	3.70172	247
3.72121	204	3.72121	217	3.72121	223	3.72121	251	3.72121	209	3.72121	215	3.72121	163	3.72121	181	3.72121	233	3.72121	228	3.72121	171	3.72121	212	3.72121	249	3.72121	235	3.72121	254
3.7407	225	3.7407	199	3.7407	216	3.7407	243	3.7407	239	3.7407	201	3.7407	185	3.7407	175	3.7407	230	3.7407	207	3.7407	190	3.7407	195	3.7407	212	3.7407	199	3.7407	235
3.76019	195	3.76019	211	3.76019	230	3.76019	251	3.76019	203	3.76019	210	3.76019	201	3.76019	168	3.76019	205	3.76019	211	3.76019	186	3.76019	222	3.76019	235	3.76019	199	3.76019	254
3.77968	210	3.77968	183	3.77968	170	3.77968	243	3.77968	207	3.77968	198	3.77968	170	3.77968	180	3.77968	214	3.77968	209	3.77968	180	3.77968	194	3.77968	213	3.77968	189	3.77968	238
3.79917	205	3.79917	199	3.79917	193	3.79917	262	3.79917	174	3.79917	189	3.79917	182	3.79917	170	3.79917	222	3.79917	222	3.79917	174	3.79917	179	3.79917	177	3.79917	188	3.79917	208
3.81865	182	3.81865	182	3.81865	197	3.81865	239	3.81865	190	3.81865	203	3.81865	168	3.81865	181	3.81865	201	3.81865	206	3.81865	160	3.81865	174	3.81865	228	3.81865	196	3.81865	217
3.83814	200	3.83814	191	3.83814	178	3.83814	228	3.83814	176	3.83814	186	3.83814	150	3.83814	164	3.83814	206	3.83814	181	3.83814	189	3.83814	163	3.83814	203	3.83814	171	3.83814	228
3.85763	214	3.85763	153	3.85763	177	3.85763	238	3.85763	185	3.85763	174	3.85763	159	3.85763	142	3.85763	194	3.85763	217	3.85763	171	3.85763	159	3.85763	185	3.85763	165	3.85763	217
3.87712	190	3.87712	191	3.87712	174	3.87712	208	3.87712	162	3.87712	160	3.87712	142	3.87712	149	3.87712	204	3.87712	181	3.87712	171	3.87712	154	3.87712	177	3.87712	166	3.87712	223
3.89661	189	3.89661	151	3.89661	171	3.89661	210	3.89661	180	3.89661	138	3.89661	163	3.89661	144	3.89661	219	3.89661	176	3.89661	137	3.89661	160	3.89661	192	3.89661	164	3.89661	188
3.9161	162	3.9161	185	3.9161	168	3.9161	210	3.9161	181	3.9161	183	3.9161	140	3.9161	126	3.9161	179	3.9161	180	3.9161	158	3.9161	149	3.9161	165	3.9161	158	3.9161	209
3.93559	172	3.93559	139	3.93559	142	3.93559	208	3.93559	165	3.93559	172	3.93559	159	3.93559	131	3.93559	176	3.93559	162	3.93559	151	3.93559	137	3.93559	172	3.93559	144	3.93559	205
3.95508	160	3.95508	158	3.95508	141	3.95508	173	3.95508	135	3.95508	151	3.95508	130	3.95508	137	3.95508	178	3.95508	160	3.95508	150	3.95508	140	3.95508	152	3.95508	171	3.95508	189
3.97457	165	3.97457	153	3.97457	161	3.97457	184	3.97457	147	3.97457	131	3.97457	145	3.97457	138	3.97457	143	3.97457	158	3.97457	143	3.97457	141	3.97457	154	3.97457	135	3.97457	194
3.99406	157	3.99406	137	3.99406	166	3.99406	179	3.99406	148	3.99406	143	3.99406	134	3.99406	130	3.99406	148	3.99406	165	3.99406	129	3.99406	123	3.99406	142	3.99406	155	3.99406	188
4.01355	164	4.01355	151	4.01355	147	4.01355	168	4.01355	154	4.01355	163	4.01355	116	4.01355	122	4.01355	147	4.01355	139	4.01355	125	4.01355	140	4.01355	156	4.01355	133	4.01355	188
4.03304	138	4.03304	153	4.03304	154	4.03304	200	4.03304	132	4.03304	150	4.03304	105	4.03304	116	4.03304	163	4.03304	135	4.03304	126	4.03304	131	4.03304	129	4.03304	130	4.03304	155
4.05253	143	4.05253	106	4.05253	145	4.05253	173	4.05253	145	4.05253	122	4.05253	126	4.05253	107	4.05253	146	4.05253	142	4.05253	112	4.05253	129	4.05253	158	4.05253	105	4.05253	179
4.07202	128	4.07202	138	4.07202	125	4.07202	144	4.07202	110	4.07202	118	4.07202	118	4.07202	123	4.07202	111	4.07202	131	4.07202	117	4.07202	113	4.07202	138	4.07202	127	4.07202	160
4.09151	125	4.09151	141	4.09151	135	4.09151	147	4.09151	130	4.09151	110	4.09151	114	4.09151	111	4.09151	136	4.09151	127	4.09151	127	4.09151	125	4.09151	119	4.09151	130	4.09151	145
4.111	125	4.111	100	4.111	136	4.111	158	4.111	108	4.111	119	4.111	106	4.111	95	4.111	137	4.111	115	4.111	114	4.111	119	4.111	135	4.111	117	4.111	140
4.13048	128	4.13048	107	4.13048	113	4.13048	149	4.13048	117	4.13048	108	4.13048	115	4.13048	93	4.13048	128	4.13048	123	4.13048	78	4.13048	100	4.13048	146	4.13048	148	4.13048	142
4.14997	127	4.14997	117	4.14997	125	4.14997	129	4.14997	96	4.14997	108	4.14997	120	4.14997	84	4.14997	102	4.14997	140	4.14997	117	4.14997	118	4.14997	126	4.14997	97	4.14997	142
4.16946	115	4.16946	105	4.16946	113	4.16946	134	4.16946	109	4.16946	126	4.16946	92	4.16946	82	4.16946	124	4.16946	128	4.16946	95	4.16946	108	4.16946	121	4.16946	108	4.16946	122
4.18895	113	4.18895	91	4.18895	108	4.18895	131	4.18895	110	4.18895	112	4.18895	90	4.18895	94	4.18895	123	4.18895	119	4.18895	90	4.18895	102	4.18895	134	4.18895	111	4.18895	128
4.20844	115	4.20844	104	4.20844	108	4.20844	125	4.20844	88	4.20844	96	4.20844	97	4.20844	92	4.20844	122	4.20844	105	4.20844	98	4.20844	94	4.20844	121	4.20844	84	4.20844	125
4.22793	95	4.22793	94	4.22793	106	4.22793	134	4.22793	98	4.22793	86	4.22793	90	4.22793	94	4.22793	119	4.22793	132	4.22793	88	4.22793	96	4.22793	114	4.22793	111	4.22793	120
4.24742	94	4.24742	85	4.24742	91	4.24742	127	4.24742	108	4.24742	93	4.24742	95	4.24742	88	4.24742	97	4.24742	97	4.24742	94	4.24742	78	4.24742	101	4.24742	101	4.24742	139
4.26691	99	4.26691	92	4.26691	111	4.26691	135	4.26691	93	4.26691	76	4.26691	80	4.26691	80	4.26691	95	4.26691	97	4.26691	84	4.26691	89	4.26691	115	4.26691	108	4.26691	102
4.2864	97	4.2864	93	4.2864	91	4.2864	124	4.2864	86	4.2864	100	4.2864	78	4.2864	73	4.2864	98	4.2864	110	4.2864	79	4.2864	95	4.2864	106	4.2864	77	4.2864	119
4.30589	90	4.30589	92	4.30589	84	4.30589	107	4.30589	93	4.30589	77	4.30589	62	4.30589	79	4.30589	96	4.30589	100	4.30589	78	4.30589	73	4.30589	101	4.30589	95	4.30589	110
4.32538	92	4.32538	87	4.32538	78	4.32538	109	4.32538	87	4.32538	91	4.32538	60	4.32538	68	4.32538	82	4.32538	73	4.32538	83	4.32538	77	4.32538	109	4.32538	93	4.32538	102
4.34487	89	4.34487	77	4.34487	77	4.34487	98	4.34487	91	4.34487	76	4.34487	66	4.34487	59	4.34487	90	4.34487	84	4.34487	63	4.34487	61	4.34487	95	4.34487	84	4.34487	107
4.36436	75	4.36436	80	4.36436	82	4.36436	125	4.36436	81	4.36436	78	4.36436	62	4.36436	49	4.36436	81	4.36436	97	4.36436	78	4.36436	81	4.36436	96	4.36436	73	4.36436	110
4.38385	82	4.38385	65	4.38385	86	4.38385	118	4.38385	86	4.38385	76	4.38385	61	4.38385	64	4.38385	92	4.38385	80	4.38385	64	4.38385	75	4.38385	103	4.38385	75	4.38385	103
4.40334	72	4.40334	71	4.40334	73	4.40334	94	4.40334	75	4.40334	88	4.40334	67	4.40334	74	4.40334	85	4.40334	94	4.40334	61	4.40334	49	4.40334	82	4.40334	64	4.40334	97
4.42283	72	4.42283	69	4.42283	75	4.42283	103	4.42283	61	4.42283	74	4.42283	55	4.42283	70	4.42283	76	4.42283	92	4.42283	58	4.42283	58	4.42283	87	4.42283	61	4.42283	85
4.44231	77	4.44231	76	4.44231	85	4.44231	109	4.44231	67	4.44231	88	4.44231	48	4.44231	61	4.44231	75	4.44231	71	4.44231	65	4.44231	63	4.44231	103	4.44231	70	4.44231	95
4.4618	88	4.4618	67	4.4618	93	4.4618	116	4.4618	59	4.4618	73	4.4618	47	4.4618	46	4.4618	93	4.4618	66	4.4618	60	4.4618	56	4.4618	84	4.4618	53	4.4618	103
4.48129	77	4.48129	66	4.48129	74	4.48129	120	4.48129	60	4.48129	75	4.48129	54	4.48129	53	4.48129	80	4.48129	59	4.48129	61	4.48129	48	4.48129	87	4.48129	77	4.48129	83
4.50078	69	4.50078	70	4.50078	60	4.50078	99	4.50078	56	4.50078	74	4.50078	49	4.50078	52	4.50078	63	4.50078	66	4.50078	42	4.50078	58	4.50078	84	4.50078	77	4.50078	87
4.52027	76	4.52027	70	4.52027	54	4.52027	96	4.52027	65	4.52027	69	4.52027	47	4.52027	58	4.52027	55	4.52027	75	4.52027	63	4.52027	65	4.52027	76	4.52027	60	4.52027	85
4.53976	61	4.53976	63	4.53976	61	4.53976	102	4.53976	64	4.53976	74	4.53976	73	4.53976	42	4.53976	60	4.53976	74	4.53976	49	4.53976	49	4.53976	58	4.53976	65	4.53976	76
4.55925	58	4.55925	51	4.55925	58	4.55925	83	4.55925	61	4.55925	47	4.55925	40	4.55925	57	4.55925	70	4.55925	60	4.55925	59	4.55925	51	4.55925	85	4.55925	61	4.55925	71
4.57874	54	4.57874	57	4.57874	60	4.57874	89	4.57874	52	4.57874	64	4.57874	41	4.57874	49	4.57874	56	4.57874	67	4.57874	61	4.57874	61	4.57874	76	4.57874	71	4.57874	93
4.59823	59	4.59823	51	4.59823	64	4.59823	87	4.59823	62	4.59823	59	4.59823	47	4.59823	44	4.59823	59	4.59823	61	4.59823	54	4.59823	57	4.59823	64	4.59823	67	4.59823	90
4.61772	56	4.61772	61	4.61772	65	4.61772	103	4.61772	67	4.61772	54	4.61772	50	4.61772	28	4.61772	64	4.61772	73	4.61772	57	4.61772	54	4.61772	72	4.61772	45	4.61772	79
4.63721	63	4.63721	45	4.63721	62	4.63721	86	4.63721	63	4.63721	61	4.63721	64	4.63721	64	4.63721	59	4.63721	59	4.63721	65	4.63721	62	4.63721	80	4.63721	51	4.63721	90
4.6567	55	4.6567	68	4.6567	54	4.6567	91	4.6567	53	4.6567	45	4.6567	43	4.6567	35	4.6567	65	4.6567	76	4.6567	59	4.6567	44	4.6567	67	4.6567	57	4.6567	91
4.67619	69	4.67619	70	4.67619	72	4.67619	75	4.67619	68	4.67619	59	4.67619	61	4.67619	46	4.67619	79	4.67619	68	4.67619	70	4.67619	44	4.67619	78	4.67619	68	4.67619	87
4.69568	56	4.69568	59	4.69568	62	4.69568	88	4.69568	72	4.69568	63	4.69568	47	4.69568	49	4.69568	58	4.69568	69	4.69568	51	4.69568	49	4.69568	76	4.69568	53	4.69568	86
4.71517	46	4.71517	59	4.71517	61	4.71517	72	4.71517	62	4.71517	66	4.71517	45	4.71517	37	4.71517	50	4.71517	62	4.71517	51	4.71517	49	4.71517	64	4.71517	55	4.71517	71
4.73466	59	4.73466	47	4.73466	50	4.73466	96	4.73466	57	4.73466	64	4.73466	42	4.73466	53	4.73466	60	4.73466	75	4.73466	54	4.73466	46	4.73466	95	4.73466	66	4.73466	81
4.75414	59	4.75414	56	4.75414	66	4.75414	85	4.75414	57	4.75414	58	4.75414	52	4.75414	48	4.75414	66	4.75414	50	4.75414	56	4.75414	44	4.75414	63	4.75414	51	4.75414	82
4.77363	49	4.77363	55	4.77363	61	4.77363	84	4.77363	66	4.77363	48	4.77363	53	4.77363	45	4.77363	61	4.77363	67	4.77363	43	4.77363	57	4.77363	64	4.77363	43	4.77363	68
4.79312	53	4.79312	52	4.79312	63	4.79312	67	4.79312	46	4.79312	55	4.79312	35	4.79312	47	4.79312	61	4.79312	63	4.79312	49	4.79312	44	4.79312	60	4.79312	50	4.79312	83
4.81261	74	4.81261	58	4.81261	51	4.81261	81	4.81261	55	4.81261	58	4.81261	40	4.81261	39	4.81261	54	4.81261	64	4.81261	37	4.81261	39	4.81261	67	4.81261	56	4.81261	78
4.8321	62	4.8321	54	4.8321	62	4.8321	82	4.8321	53	4.8321	56	4.8321	45	4.8321	56	4.8321	62	4.8321	55	4.8321	42	4.8321	51	4.8321	69	4.8321	37	4.8321	69
4.85159	56	4.85159	50	4.85159	55	4.85159	77	4.85159	64	4.85159	45	4.85159	29	4.85159	46	4.85159	61	4.85159	61	4.85159	42	4.85159	46	4.85159	76	4.85159	51	4.85159	87
4.87108	55	4.87108	57	4.87108	75	4.87108	67	4.87108	51	4.87108	48	4.87108	46	4.87108	43	4.87108	52	4.87108	62	4.87108	41	4.87108	45	4.87108	74	4.87108	44	4.87108	76
4.89057	55	4.89057	50	4.89057	48	4.89057	82	4.89057	60	4.89057	46	4.89057	39	4.89057	39	4.89057	42	4.89057	67	4.89057	40	4.89057	37	4.89057	62	4.89057	51	4.89057	69
4.91006	61	4.91006	42	4.91006	45	4.91006	70	4.91006	47	4.91006	51	4.91006	31	4.91006	62	4.91006	53	4.91006	55	4.91006	43	4.91006	46	4.91006	73	4.91006	47	4.91006	85
4.92955	53	4.92955	62	4.92955	56	4.92955	91	4.92955	65	4.92955	44	4.92955	46	4.92955	36	4.92955	57	4.92955	56	4.92955	41	4.92955	44	4.92955	67	4.92955	46	4.92955	61
4.94904	54	4.94904	54	4.94904	58	4.94904	71	4.94904	46	4.94904	62	4.94904	37	4.94904	39	4.94904	56	4.94904	62	4.94904	50	4.94904	53	4.94904	61	4.94904	52	4.94904	65
4.96853	41	4.96853	49	4.96853	60	4.96853	74	4.96853	38	4.96853	51	4.96853	40	4.96853	42	4.96853	57	4.96853	49	4.96853	47	4.96853	47	4.96853	74	4.96853	43	4.96853	69
4.98802	36	4.98802	45	4.98802	50	4.98802	73	4.98802	48	4.98802	45	4.98802	25	4.98802	33	4.98802	46	4.98802	62	4.98802	28	4.98802	50	4.98802	61	4.98802	40	4.98802	65
5.00751	53	5.00751	45	5.00751	54	5.00751	60	5.00751	53	5.00751	42	5.00751	37	5.00751	42	5.00751	52	5.00751	55	5.00751	35	5.00751	35	5.00751	47	5.00751	41	5.00751	61
5.027	43	5.027	47	5.027	52	5.027	78	5.027	43	5.027	45	5.027	38	5.027	36	5.027	43	5.027	46	5.027	42	5.027	37	5.027	58	5.027	43	5.027	69
5.04649	48	5.04649	40	5.04649	52	5.04649	87	5.04649	41	5.04649	57	5.04649	33	5.04649	30	5.04649	39	5.04649	55	5.04649	38	5.04649	49	5.04649	50	5.04649	37	5.04649	62
5.06598	41	5.06598	44	5.06598	41	5.06598	63	5.06598	51	5.06598	55	5.06598	33	5.06598	32	5.06598	43	5.06598	53	5.06598	33	5.06598	32	5.06598	70	5.06598	49	5.06598	72
5.08546	44	5.08546	38	5.08546	50	5.08546	76	5.08546	54	5.08546	40	5.08546	40	5.08546	28	5.08546	51	5.08546	61	5.08546	42	5.08546	45	5.08546	56	5.08546	38	5.08546	63
5.10495	59	5.10495	39	5.10495	42	5.10495	65	5.10495	42	5.10495	45	5.10495	34	5.10495	29	5.10495	52	5.10495	44	5.10495	67	5.10495	39	5.10495	65	5.10495	41	5.10495	58
5.12444	47	5.12444	34	5.12444	53	5.12444	76	5.12444	36	5.12444	34	5.12444	35	5.12444	27	5.12444	47	5.12444	52	5.12444	51	5.12444	35	5.12444	64	5.12444	42	5.12444	46
5.14393	44	5.14393	42	5.14393	45	5.14393	60	5.14393	45	5.14393	45	5.14393	38	5.14393	39	5.14393	47	5.14393	60	5.14393	47	5.14393	32	5.14393	55	5.14393	35	5.14393	67
5.16342	37	5.16342	50	5.16342	49	5.16342	77	5.16342	54	5.16342	33	5.16342	42	5.16342	34	5.16342	46	5.16342	47	5.16342	37	5.16342	44	5.16342	55	5.16342	59	5.16342	57
5.18291	36	5.18291	39	5.18291	45	5.18291	54	5.18291	51	5.18291	47	5.18291	27	5.18291	42	5.18291	42	5.18291	53	5.18291	36	5.18291	36	5.18291	44	5.18291	39	5.18291	68
5.2024	44	5.2024	43	5.2024	46	5.2024	67	5.2024	51	5.2024	38	5.2024	34	5.2024	27	5.2024	41	5.2024	50	5.2024	50	5.2024	39	5.2024	52	5.2024	39	5.2024	72
5.22189	39	5.22189	49	5.22189	49	5.22189	70	5.22189	53	5.22189	45	5.22189	36	5.22189	28	5.22189	43	5.22189	45	5.22189	43	5.22189	26	5.22189	53	5.22189	32	5.22189	75
5.24138	47	5.24138	51	5.24138	49	5.24138	70	5.24138	37	5.24138	45	5.24138	32	5.24138	35	5.24138	51	5.24138	48	5.24138	30	5.24138	40	5.24138	47	5.24138	35	5.24138	57
5.26087	47	5.26087	55	5.26087	45	5.26087	56	5.26087	49	5.26087	45	5.26087	38	5.26087	42	5.26087	50	5.26087	47	5.26087	37	5.26087	38	5.26087	53	5.26087	47	5.26087	58
5.28036	48	5.28036	29	5.28036	56	5.28036	58	5.28036	47	5.28036	44	5.28036	38	5.28036	31	5.28036	37	5.28036	50	5.28036	43	5.28036	37	5.28036	58	5.28036	31	5.28036	63
5.29985	46	5.29985	39	5.29985	49	5.29985	57	5.29985	51	5.29985	49	5.29985	39	5.29985	35	5.29985	39	5.29985	57	5.29985	34	5.29985	34	5.29985	62	5.29985	50	5.29985	56
5.31934	44	5.31934	54	5.31934	44	5.31934	69	5.31934	33	5.31934	41	5.31934	30	5.31934	38	5.31934	32	5.31934	50	5.31934	33	5.31934	38	5.31934	63	5.31934	30	5.31934	48
5.33883	53	5.33883	39	5.33883	33	5.33883	67	5.33883	39	5.33883	56	5.33883	33	5.33883	33	5.33883	41	5.33883	44	5.33883	38	5.33883	38	5.33883	61	5.33883	50	5.33883	54
5.35832	42	5.35832	40	5.35832	47	5.35832	46	5.35832	44	5.35832	47	5.35832	36	5.35832	33	5.35832	38	5.35832	47	5.35832	53	5.35832	30	5.35832	64	5.35832	38	5.35832	50
5.37781	38	5.37781	43	5.37781	41	5.37781	47	5.37781	41	5.37781	44	5.37781	37	5.37781	23	5.37781	32	5.37781	52	5.37781	35	5.37781	32	5.37781	57	5.37781	46	5.37781	57
5.39729	45	5.39729	39	5.39729	46	5.39729	65	5.39729	47	5.39729	33	5.39729	26	5.39729	30	5.39729	35	5.39729	40	5.39729	33	5.39729	31	5.39729	50	5.39729	45	5.39729	71
5.41678	36	5.41678	35	5.41678	47	5.41678	61	5.41678	41	5.41678	53	5.41678	31	5.41678	34	5.41678	46	5.41678	53	5.41678	37	5.41678	32	5.41678	47	5.41678	49	5.41678	65
5.43627	34	5.43627	42	5.43627	53	5.43627	56	5.43627	54	5.43627	35	5.43627	27	5.43627	22	5.43627	43	5.43627	36	5.43627	41	5.43627	43	5.43627	46	5.43627	55	5.43627	54
5.45576	45	5.45576	37	5.45576	31	5.45576	70	5.45576	41	5.45576	31	5.45576	34	5.45576	33	5.45576	36	5.45576	41	5.45576	38	5.45576	29	5.45576	60	5.45576	22	5.45576	44
5.47525	31	5.47525	24	5.47525	32	5.47525	55	5.47525	41	5.47525	41	5.47525	37	5.47525	39	5.47525	42	5.47525	46	5.47525	30	5.47525	42	5.47525	56	5.47525	33	5.47525	51
5.49474	36	5.49474	38	5.49474	38	5.49474	77	5.49474	47	5.49474	42	5.49474	19	5.49474	25	5.49474	45	5.49474	51	5.49474	26	5.49474	31	5.49474	49	5.49474	46	5.49474	56
5.51423	35	5.51423	37	5.51423	46	5.51423	54	5.51423	33	5.51423	34	5.51423	30	5.51423	17	5.51423	33	5.51423	32	5.51423	36	5.51423	27	5.51423	45	5.51423	33	5.51423	60
5.53372	52	5.53372	31	5.53372	42	5.53372	66	5.53372	57	5.53372	38	5.53372	32	5.53372	32	5.53372	39	5.53372	61	5.53372	38	5.53372	39	5.53372	64	5.53372	36	5.53372	60
5.55321	41	5.55321	33	5.55321	48	5.55321	50	5.55321	29	5.55321	40	5.55321	20	5.55321	28	5.55321	43	5.55321	37	5.55321	32	5.55321	29	5.55321	54	5.55321	33	5.55321	51
5.5727	43	5.5727	42	5.5727	58	5.5727	50	5.5727	40	5.5727	45	5.5727	27	5.5727	24	5.5727	34	5.5727	43	5.5727	34	5.5727	41	5.5727	42	5.5727	47	5.5727	41
5.59219	50	5.59219	44	5.59219	38	5.59219	64	5.59219	36	5.59219	38	5.59219	32	5.59219	24	5.59219	41	5.59219	49	5.59219	40	5.59219	35	5.59219	46	5.59219	44	5.59219	46
5.61168	35	5.61168	41	5.61168	45	5.61168	65	5.61168	33	5.61168	33	5.61168	29	5.61168	34	5.61168	51	5.61168	33	5.61168	31	5.61168	33	5.61168	49	5.61168	33	5.61168	39
5.63117	41	5.63117	35	5.63117	38	5.63117	50	5.63117	33	5.63117	39	5.63117	21	5.63117	43	5.63117	39	5.63117	39	5.63117	37	5.63117	29	5.63117	56	5.63117	34	5.63117	60
5.65066	37	5.65066	50	5.65066	34	5.65066	53	5.65066	41	5.65066	40	5.65066	34	5.65066	37	5.65066	35	5.65066	43	5.65066	40	5.65066	31	5.65066	30	5.65066	43	5.65066	33
5.67015	38	5.67015	37	5.67015	45	5.67015	70	5.67015	36	5.67015	32	5.67015	21	5.67015	33	5.67015	50	5.67015	35	5.67015	30	5.67015	40	5.67015	48	5.67015	37	5.67015	52
5.68964	41	5.68964	38	5.68964	36	5.68964	51	5.68964	52	5.68964	38	5.68964	30	5.68964	24	5.68964	50	5.68964	31	5.68964	43	5.68964	34	5.68964	52	5.68964	40	5.68964	46
5.70912	36	5.70912	25	5.70912	32	5.70912	45	5.70912	39	5.70912	31	5.70912	32	5.70912	20	5.70912	30	5.70912	51	5.70912	18	5.70912	35	5.70912	43	5.70912	36	5.70912	54
5.72861	35	5.72861	36	5.72861	40	5.72861	45	5.72861	36	5.72861	34	5.72861	32	5.72861	35	5.72861	39	5.72861	36	5.72861	29	5.72861	24	5.72861	51	5.72861	39	5.72861	46
5.7481	41	5.7481	51	5.7481	33	5.7481	64	5.7481	32	5.7481	38	5.7481	22	5.7481	36	5.7481	51	5.7481	43	5.7481	40	5.7481	22	5.7481	35	5.7481	32	5.7481	53
5.76759	38	5.76759	34	5.76759	32	5.76759	49	5.76759	44	5.76759	37	5.76759	35	5.76759	39	5.76759	39	5.76759	39	5.76759	37	5.76759	28	5.76759	43	5.76759	38	5.76759	42
5.78708	32	5.78708	43	5.78708	44	5.78708	54	5.78708	39	5.78708	37	5.78708	28	5.78708	37	5.78708	34	5.78708	51	5.78708	42	5.78708	36	5.78708	52	5.78708	36	5.78708	54
5.80657	31	5.80657	33	5.80657	47	5.80657	60	5.80657	31	5.80657	39	5.80657	26	5.80657	31	5.80657	53	5.80657	46	5.80657	33	5.80657	28	5.80657	57	5.80657	32	5.80657	48
5.82606	32	5.82606	47	5.82606	36	5.82606	59	5.82606	38	5.82606	38	5.82606	29	5.82606	34	5.82606	42	5.82606	42	5.82606	33	5.82606	32	5.82606	43	5.82606	43	5.82606	47
5.84555	33	5.84555	35	5.84555	35	5.84555	52	5.84555	38	5.84555	37	5.84555	34	5.84555	29	5.84555	45	5.84555	49	5.84555	26	5.84555	26	5.84555	50	5.84555	28	5.84555	51
5.86504	38	5.86504	44	5.86504	40	5.86504	45	5.86504	37	5.86504	31	5.86504	26	5.86504	32	5.86504	56	5.86504	34	5.86504	37	5.86504	37	5.86504	30	5.86504	40	5.86504	41
5.88453	32	5.88453	48	5.88453	40	5.88453	61	5.88453	30	5.88453	47	5.88453	24	5.88453	21	5.88453	32	5.88453	42	5.88453	34	5.88453	35	5.88453	31	5.88453	43	5.88453	56
5.90402	36	5.90402	26	5.90402	35	5.90402	44	5.90402	37	5.90402	28	5.90402	30	5.90402	38	5.90402	37	5.90402	54	5.90402	44	5.90402	27	5.90402	38	5.90402	43	5.90402	53
5.92351	50	5.92351	34	5.92351	43	5.92351	53	5.92351	36	5.92351	33	5.92351	26	5.92351	34	5.92351	40	5.92351	48	5.92351	29	5.92351	30	5.92351	47	5.92351	34	5.92351	47
5.943	43	5.943	29	5.943	36	5.943	58	5.943	32	5.943	38	5.943	28	5.943	23	5.943	50	5.943	60	5.943	33	5.943	34	5.943	50	5.943	34	5.943	48
5.96249	44	5.96249	25	5.96249	40	5.96249	51	5.96249	40	5.96249	31	5.96249	26	5.96249	34	5.96249	43	5.96249	34	5.96249	36	5.96249	28	5.96249	45	5.96249	44	5.96249	49
5.98198	37	5.98198	39	5.98198	37	5.98198	57	5.98198	31	5.98198	37	5.98198	24	5.98198	42	5.98198	40	5.98198	40	5.98198	29	5.98198	33	5.98198	60	5.98198	34	5.98198	57
6.00147	35	6.00147	36	6.00147	46	6.00147	58	6.00147	44	6.00147	38	6.00147	21	6.00147	21	6.00147	41	6.00147	31	6.00147	39	6.00147	29	6.00147	36	6.00147	55	6.00147	48
6.02095	37	6.02095	46	6.02095	45	6.02095	47	6.02095	31	6.02095	30	6.02095	22	6.02095	27	6.02095	27	6.02095	41	6.02095	37	6.02095	30	6.02095	49	6.02095	36	6.02095	42
6.04044	31	6.04044	35	6.04044	34	6.04044	51	6.04044	34	6.04044	36	6.04044	37	6.04044	26	6.04044	31	6.04044	51	6.04044	26	6.04044	29	6.04044	51	6.04044	28	6.04044	42
6.05993	33	6.05993	30	6.05993	47	6.05993	53	6.05993	42	6.05993	25	6.05993	27	6.05993	27	6.05993	38	6.05993	37	6.05993	35	6.05993	26	6.05993	59	6.05993	29	6.05993	34
6.07942	29	6.07942	45	6.07942	38	6.07942	39	6.07942	37	6.07942	34	6.07942	27	6.07942	43	6.07942	34	6.07942	41	6.07942	40	6.07942	27	6.07942	44	6.07942	34	6.07942	49
6.09891	27	6.09891	24	6.09891	27	6.09891	51	6.09891	28	6.09891	51	6.09891	37	6.09891	31	6.09891	41	6.09891	26	6.09891	26	6.09891	27	6.09891	40	6.09891	29	6.09891	50
6.1184	26	6.1184	40	6.1184	38	6.1184	45	6.1184	40	6.1184	23	6.1184	29	6.1184	26	6.1184	36	6.1184	36	6.1184	27	6.1184	30	6.1184	46	6.1184	23	6.1184	60
6.13789	41	6.13789	36	6.13789	43	6.13789	44	6.13789	31	6.13789	31	6.13789	31	6.13789	28	6.13789	36	6.13789	45	6.13789	30	6.13789	25	6.13789	42	6.13789	30	6.13789	48
6.15738	37	6.15738	39	6.15738	33	6.15738	52	6.15738	39	6.15738	38	6.15738	28	6.15738	24	6.15738	32	6.15738	41	6.15738	31	6.15738	21	6.15738	50	6.15738	35	6.15738	51
6.17687	38	6.17687	32	6.17687	28	6.17687	51	6.17687	38	6.17687	29	6.17687	31	6.17687	19	6.17687	37	6.17687	41	6.17687	33	6.17687	31	6.17687	32	6.17687	32	6.17687	38
6.19636	34	6.19636	29	6.19636	32	6.19636	46	6.19636	39	6.19636	33	6.19636	33	6.19636	25	6.19636	38	6.19636	49	6.19636	30	6.19636	35	6.19636	38	6.19636	40	6.19636	43
6.21585	33	6.21585	23	6.21585	32	6.21585	51	6.21585	34	6.21585	41	6.21585	29	6.21585	36	6.21585	41	6.21585	43	6.21585	29	6.21585	36	6.21585	40	6.21585	25	6.21585	42
6.23534	26	6.23534	32	6.23534	34	6.23534	36	6.23534	34	6.23534	35	6.23534	36	6.23534	36	6.23534	47	6.23534	43	6.23534	34	6.23534	24	6.23534	39	6.23534	36	6.23534	58
6.25483	28	6.25483	36	6.25483	33	6.25483	47	6.25483	36	6.25483	34	6.25483	24	6.25483	20	6.25483	35	6.25483	33	6.25483	37	6.25483	31	6.25483	37	6.25483	34	6.25483	54
6.27432	27	6.27432	36	6.27432	32	6.27432	46	6.27432	40	6.27432	30	6.27432	21	6.27432	31	6.27432	36	6.27432	42	6.27432	31	6.27432	16	6.27432	36	6.27432	28	6.27432	56
6.29381	31	6.29381	36	6.29381	51	6.29381	40	6.29381	37	6.29381	33	6.29381	31	6.29381	23	6.29381	45	6.29381	45	6.29381	25	6.29381	30	6.29381	44	6.29381	25	6.29381	50
6.3133	37	6.3133	29	6.3133	42	6.3133	31	6.3133	40	6.3133	37	6.3133	26	6.3133	36	6.3133	35	6.3133	32	6.3133	26	6.3133	29	6.3133	39	6.3133	30	6.3133	51
6.33279	32	6.33279	34	6.33279	30	6.33279	54	6.33279	27	6.33279	37	6.33279	35	6.33279	26	6.33279	32	6.33279	41	6.33279	34	6.33279	25	6.33279	51	6.33279	26	6.33279	46
6.35227	33	6.35227	31	6.35227	32	6.35227	52	6.35227	33	6.35227	28	6.35227	29	6.35227	29	6.35227	35	6.35227	37	6.35227	25	6.35227	36	6.35227	31	6.35227	29	6.35227	37
6.37176	35	6.37176	39	6.37176	26	6.37176	41	6.37176	36	6.37176	35	6.37176	23	6.37176	29	6.37176	38	6.37176	34	6.37176	44	6.37176	31	6.37176	33	6.37176	38	6.37176	47
6.39125	34	6.39125	42	6.39125	26	6.39125	46	6.39125	32	6.39125	26	6.39125	28	6.39125	31	6.39125	32	6.39125	34	6.39125	26	6.39125	35	6.39125	34	6.39125	30	6.39125	46
6.41074	35	6.41074	38	6.41074	32	6.41074	35	6.41074	21	6.41074	24	6.41074	30	6.41074	25	6.41074	34	6.41074	45	6.41074	29	6.41074	30	6.41074	37	6.41074	37	6.41074	34
6.43023	37	6.43023	32	6.43023	35	6.43023	42	6.43023	30	6.43023	37	6.43023	21	6.43023	35	6.43023	32	6.43023	40	6.43023	27	6.43023	19	6.43023	43	6.43023	32	6.43023	44
6.44972	32	6.44972	35	6.44972	28	6.44972	35	6.44972	38	6.44972	30	6.44972	16	6.44972	22	6.44972	40	6.44972	36	6.44972	35	6.44972	18	6.44972	41	6.44972	38	6.44972	38
6.46921	41	6.46921	34	6.46921	33	6.46921	36	6.46921	26	6.46921	28	6.46921	35	6.46921	25	6.46921	39	6.46921	49	6.46921	24	6.46921	32	6.46921	36	6.46921	34	6.46921	41
6.4887	38	6.4887	26	6.4887	41	6.4887	37	6.4887	41	6.4887	30	6.4887	24	6.4887	28	6.4887	33	6.4887	38	6.4887	31	6.4887	26	6.4887	35	6.4887	37	6.4887	53
6.50819	33	6.50819	32	6.50819	32	6.50819	49	6.50819	29	6.50819	37	6.50819	29	6.50819	23	6.50819	35	6.50819	54	6.50819	26	6.50819	33	6.50819	48	6.50819	33	6.50819	37
6.52768	31	6.52768	30	6.52768	31	6.52768	31	6.52768	30	6.52768	34	6.52768	28	6.52768	40	6.52768	25	6.52768	43	6.52768	26	6.52768	33	6.52768	33	6.52768	34	6.52768	53
6.54717	22	6.54717	37	6.54717	31	6.54717	29	6.54717	31	6.54717	38	6.54717	34	6.54717	33	6.54717	29	6.54717	36	6.54717	22	6.54717	19	6.54717	38	6.54717	35	6.54717	44
6.56666	37	6.56666	33	6.56666	31	6.56666	52	6.56666	25	6.56666	27	6.56666	26	6.56666	25	6.56666	33	6.56666	31	6.56666	32	6.56666	30	6.56666	42	6.56666	30	6.56666	51
6.58615	35	6.58615	40	6.58615	31	6.58615	41	6.58615	38	6.58615	34	6.58615	24	6.58615	19	6.58615	26	6.58615	39	6.58615	25	6.58615	21	6.58615	40	6.58615	32	6.58615	45
6.60564	27	6.60564	39	6.60564	36	6.60564	42	6.60564	35	6.60564	28	6.60564	29	6.60564	26	6.60564	29	6.60564	49	6.60564	33	6.60564	31	6.60564	35	6.60564	43	6.60564	53
6.62513	44	6.62513	27	6.62513	37	6.62513	41	6.62513	32	6.62513	35	6.62513	22	6.62513	32	6.62513	35	6.62513	42	6.62513	33	6.62513	21	6.62513	29	6.62513	39	6.62513	42
6.64462	30	6.64462	32	6.64462	37	6.64462	49	6.64462	30	6.64462	32	6.64462	19	6.64462	30	6.64462	25	6.64462	34	6.64462	26	6.64462	26	6.64462	36	6.64462	26	6.64462	45
6.6641	25	6.6641	18	6.6641	28	6.6641	41	6.6641	31	6.6641	30	6.6641	23	6.6641	25	6.6641	45	6.6641	39	6.6641	24	6.6641	24	6.6641	54	6.6641	33	6.6641	49
6.68359	28	6.68359	27	6.68359	40	6.68359	44	6.68359	34	6.68359	36	6.68359	22	6.68359	21	6.68359	31	6.68359	38	6.68359	23	6.68359	28	6.68359	37	6.68359	28	6.68359	47
6.70308	28	6.70308	35	6.70308	36	6.70308	37	6.70308	28	6.70308	34	6.70308	27	6.70308	28	6.70308	38	6.70308	39	6.70308	27	6.70308	24	6.70308	36	6.70308	37	6.70308	46
6.72257	39	6.72257	36	6.72257	31	6.72257	44	6.72257	39	6.72257	16	6.72257	22	6.72257	24	6.72257	30	6.72257	35	6.72257	25	6.72257	27	6.72257	43	6.72257	24	6.72257	57
6.74206	28	6.74206	30	6.74206	24	6.74206	39	6.74206	33	6.74206	29	6.74206	22	6.74206	28	6.74206	44	6.74206	28	6.74206	28	6.74206	27	6.74206	38	6.74206	30	6.74206	41
6.76155	28	6.76155	41	6.76155	32	6.76155	46	6.76155	28	6.76155	25	6.76155	33	6.76155	25	6.76155	25	6.76155	44	6.76155	31	6.76155	27	6.76155	37	6.76155	32	6.76155	42
6.78104	24	6.78104	31	6.78104	39	6.78104	50	6.78104	22	6.78104	27	6.78104	25	6.78104	28	6.78104	22	6.78104	41	6.78104	23	6.78104	25	6.78104	29	6.78104	43	6.78104	34
6.80053	33	6.80053	40	6.80053	28	6.80053	41	6.80053	25	6.80053	29	6.80053	23	6.80053	28	6.80053	41	6.80053	28	6.80053	28	6.80053	22	6.80053	35	6.80053	28	6.80053	42
6.82002	31	6.82002	25	6.82002	24	6.82002	43	6.82002	31	6.82002	31	6.82002	25	6.82002	21	6.82002	23	6.82002	37	6.82002	28	6.82002	26	6.82002	37	6.82002	24	6.82002	44
6.83951	35	6.83951	22	6.83951	26	6.83951	48	6.83951	22	6.83951	22	6.83951	22	6.83951	27	6.83951	29	6.83951	50	6.83951	19	6.83951	29	6.83951	40	6.83951	30	6.83951	36
6.859	35	6.859	27	6.859	32	6.859	36	6.859	23	6.859	34	6.859	30	6.859	37	6.859	32	6.859	35	6.859	30	6.859	19	6.859	38	6.859	19	6.859	28
6.87849	29	6.87849	36	6.87849	47	6.87849	33	6.87849	30	6.87849	26	6.87849	27	6.87849	34	6.87849	29	6.87849	25	6.87849	26	6.87849	20	6.87849	44	6.87849	33	6.87849	34
6.89798	31	6.89798	34	6.89798	38	6.89798	44	6.89798	40	6.89798	27	6.89798	13	6.89798	23	6.89798	26	6.89798	33	6.89798	30	6.89798	28	6.89798	40	6.89798	38	6.89798	39
6.91747	27	6.91747	25	6.91747	32	6.91747	35	6.91747	34	6.91747	20	6.91747	15	6.91747	17	6.91747	34	6.91747	37	6.91747	26	6.91747	24	6.91747	33	6.91747	36	6.91747	33
6.93696	22	6.93696	41	6.93696	32	6.93696	44	6.93696	32	6.93696	32	6.93696	30	6.93696	30	6.93696	35	6.93696	41	6.93696	31	6.93696	27	6.93696	44	6.93696	28	6.93696	36
6.95645	33	6.95645	36	6.95645	37	6.95645	43	6.95645	19	6.95645	33	6.95645	19	6.95645	23	6.95645	34	6.95645	32	6.95645	30	6.95645	22	6.95645	32	6.95645	32	6.95645	39
6.97593	29	6.97593	39	6.97593	25	6.97593	40	6.97593	29	6.97593	28	6.97593	19	6.97593	33	6.97593	38	6.97593	43	6.97593	28	6.97593	28	6.97593	42	6.97593	31	6.97593	43
6.99542	37	6.99542	31	6.99542	28	6.99542	36	6.99542	27	6.99542	31	6.99542	34	6.99542	26	6.99542	29	6.99542	41	6.99542	20	6.99542	19	6.99542	21	6.99542	19	6.99542	50
7.01491	23	7.01491	35	7.01491	35	7.01491	33	7.01491	21	7.01491	21	7.01491	25	7.01491	24	7.01491	42	7.01491	30	7.01491	22	7.01491	22	7.01491	37	7.01491	24	7.01491	35
7.0344	35	7.0344	26	7.0344	19	7.0344	47	7.0344	25	7.0344	38	7.0344	18	7.0344	18	7.0344	28	7.0344	22	7.0344	23	7.0344	20	7.0344	36	7.0344	33	7.0344	36
7.05389	33	7.05389	30	7.05389	29	7.05389	43	7.05389	27	7.05389	25	7.05389	29	7.05389	22	7.05389	33	7.05389	31	7.05389	21	7.05389	32	7.05389	38	7.05389	35	7.05389	34
7.07338	29	7.07338	27	7.07338	29	7.07338	52	7.07338	38	7.07338	26	7.07338	31	7.07338	29	7.07338	27	7.07338	38	7.07338	34	7.07338	21	7.07338	32	7.07338	33	7.07338	32
7.09287	25	7.09287	45	7.09287	42	7.09287	33	7.09287	23	7.09287	34	7.09287	27	7.09287	17	7.09287	29	7.09287	29	7.09287	26	7.09287	22	7.09287	28	7.09287	26	7.09287	30
7.11236	29	7.11236	28	7.11236	42	7.11236	35	7.11236	35	7.11236	28	7.11236	24	7.11236	27	7.11236	30	7.11236	28	7.11236	23	7.11236	26	7.11236	33	7.11236	24	7.11236	43
7.13185	24	7.13185	31	7.13185	42	7.13185	29	7.13185	25	7.13185	25	7.13185	33	7.13185	33	7.13185	34	7.13185	49	7.13185	25	7.13185	22	7.13185	36	7.13185	27	7.13185	44
7.15134	28	7.15134	34	7.15134	24	7.15134	45	7.15134	23	7.15134	25	7.15134	24	7.15134	23	7.15134	32	7.15134	35	7.15134	36	7.15134	32	7.15134	31	7.15134	25	7.15134	41
7.17083	31	7.17083	38	7.17083	30	7.17083	36	7.17083	37	7.17083	26	7.17083	26	7.17083	25	7.17083	20	7.17083	37	7.17083	26	7.17083	15	7.17083	37	7.17083	24	7.17083	34
7.19032	30	7.19032	35	7.19032	28	7.19032	39	7.19032	22	7.19032	42	7.19032	16	7.19032	24	7.19032	23	7.19032	45	7.19032	15	7.19032	13	7.19032	35	7.19032	29	7.19032	46
7.20981	30	7.20981	28	7.20981	37	7.20981	41	7.20981	21	7.20981	24	7.20981	32	7.20981	24	7.20981	32	7.20981	38	7.20981	27	7.20981	26	7.20981	33	7.20981	21	7.20981	35
7.2293	19	7.2293	33	7.2293	34	7.2293	36	7.2293	30	7.2293	26	7.2293	27	7.2293	30	7.2293	31	7.2293	27	7.2293	15	7.2293	21	7.2293	28	7.2293	34	7.2293	41
7.24879	23	7.24879	31	7.24879	30	7.24879	29	7.24879	16	7.24879	29	7.24879	28	7.24879	24	7.24879	33	7.24879	43	7.24879	22	7.24879	23	7.24879	41	7.24879	33	7.24879	41
7.26828	31	7.26828	32	7.26828	28	7.26828	35	7.26828	29	7.26828	27	7.26828	28	7.26828	23	7.26828	19	7.26828	36	7.26828	21	7.26828	28	7.26828	28	7.26828	33	7.26828	33
7.28776	21	7.28776	20	7.28776	30	7.28776	45	7.28776	28	7.28776	26	7.28776	21	7.28776	30	7.28776	31	7.28776	28	7.28776	29	7.28776	29	7.28776	42	7.28776	41	7.28776	35
7.30725	29	7.30725	30	7.30725	32	7.30725	24	7.30725	29	7.30725	24	7.30725	25	7.30725	21	7.30725	29	7.30725	27	7.30725	28	7.30725	20	7.30725	41	7.30725	32	7.30725	41
7.32674	21	7.32674	30	7.32674	34	7.32674	29	7.32674	23	7.32674	20	7.32674	25	7.32674	18	7.32674	35	7.32674	35	7.32674	25	7.32674	14	7.32674	32	7.32674	44	7.32674	39
7.34623	26	7.34623	30	7.34623	32	7.34623	28	7.34623	25	7.34623	22	7.34623	18	7.34623	20	7.34623	33	7.34623	38	7.34623	21	7.34623	35	7.34623	34	7.34623	29	7.34623	36
7.36572	25	7.36572	35	7.36572	39	7.36572	46	7.36572	30	7.36572	22	7.36572	16	7.36572	26	7.36572	34	7.36572	35	7.36572	32	7.36572	19	7.36572	29	7.36572	25	7.36572	42
7.38521	30	7.38521	36	7.38521	31	7.38521	35	7.38521	29	7.38521	22	7.38521	26	7.38521	30	7.38521	20	7.38521	33	7.38521	25	7.38521	19	7.38521	32	7.38521	31	7.38521	38
7.4047	24	7.4047	28	7.4047	19	7.4047	42	7.4047	30	7.4047	26	7.4047	25	7.4047	17	7.4047	25	7.4047	35	7.4047	33	7.4047	18	7.4047	37	7.4047	18	7.4047	32
7.42419	26	7.42419	24	7.42419	26	7.42419	39	7.42419	33	7.42419	21	7.42419	25	7.42419	21	7.42419	20	7.42419	21	7.42419	28	7.42419	18	7.42419	36	7.42419	21	7.42419	34
7.44368	28	7.44368	23	7.44368	21	7.44368	37	7.44368	24	7.44368	34	7.44368	30	7.44368	26	7.44368	28	7.44368	36	7.44368	25	7.44368	25	7.44368	36	7.44368	39	7.44368	37
7.46317	25	7.46317	23	7.46317	23	7.46317	30	7.46317	29	7.46317	23	7.46317	20	7.46317	21	7.46317	29	7.46317	35	7.46317	16	7.46317	23	7.46317	43	7.46317	30	7.46317	35
7.48266	20	7.48266	29	7.48266	22	7.48266	38	7.48266	17	7.48266	26	7.48266	18	7.48266	12	7.48266	26	7.48266	27	7.48266	27	7.48266	22	7.48266	35	7.48266	29	7.48266	34
7.50215	28	7.50215	25	7.50215	24	7.50215	44	7.50215	32	7.50215	24	7.50215	35	7.50215	24	7.50215	31	7.50215	29	7.50215	22	7.50215	16	7.50215	35	7.50215	33	7.50215	38
7.52164	25	7.52164	22	7.52164	32	7.52164	43	7.52164	28	7.52164	23	7.52164	30	7.52164	17	7.52164	29	7.52164	31	7.52164	27	7.52164	22	7.52164	29	7.52164	32	7.52164	42
7.54113	29	7.54113	37	7.54113	22	7.54113	37	7.54113	26	7.54113	33	7.54113	18	7.54113	19	7.54113	26	7.54113	34	7.54113	32	7.54113	19	7.54113	29	7.54113	31	7.54113	45
7.56062	27	7.56062	28	7.56062	31	7.56062	32	7.56062	30	7.56062	27	7.56062	24	7.56062	24	7.56062	26	7.56062	31	7.56062	28	7.56062	23	7.56062	36	7.56062	30	7.56062	38
7.58011	28	7.58011	22	7.58011	19	7.58011	36	7.58011	20	7.58011	29	7.58011	19	7.58011	22	7.58011	27	7.58011	24	7.58011	25	7.58011	26	7.58011	29	7.58011	31	7.58011	52
7.5996	30	7.5996	28	7.5996	24	7.5996	38	7.5996	35	7.5996	35	7.5996	21	7.5996	28	7.5996	20	7.5996	43	7.5996	20	7.5996	24	7.5996	43	7.5996	35	7.5996	31
7.61908	22	7.61908	32	7.61908	26	7.61908	26	7.61908	22	7.61908	18	7.61908	22	7.61908	27	7.61908	30	7.61908	33	7.61908	28	7.61908	23	7.61908	32	7.61908	29	7.61908	32
7.63857	28	7.63857	29	7.63857	29	7.63857	33	7.63857	22	7.63857	24	7.63857	22	7.63857	15	7.63857	28	7.63857	19	7.63857	24	7.63857	21	7.63857	31	7.63857	25	7.63857	35
7.65806	20	7.65806	22	7.65806	19	7.65806	45	7.65806	26	7.65806	40	7.65806	24	7.65806	24	7.65806	29	7.65806	36	7.65806	27	7.65806	18	7.65806	33	7.65806	23	7.65806	36
7.67755	30	7.67755	27	7.67755	27	7.67755	28	7.67755	34	7.67755	41	7.67755	27	7.67755	23	7.67755	29	7.67755	32	7.67755	25	7.67755	22	7.67755	33	7.67755	24	7.67755	25
7.69704	31	7.69704	32	7.69704	28	7.69704	39	7.69704	30	7.69704	27	7.69704	23	7.69704	30	7.69704	25	7.69704	25	7.69704	31	7.69704	22	7.69704	38	7.69704	24	7.69704	32
7.71653	20	7.71653	18	7.71653	36	7.71653	39	7.71653	19	7.71653	31	7.71653	20	7.71653	20	7.71653	34	7.71653	27	7.71653	23	7.71653	14	7.71653	27	7.71653	32	7.71653	42
7.73602	25	7.73602	27	7.73602	26	7.73602	34	7.73602	27	7.73602	37	7.73602	29	7.73602	17	7.73602	32	7.73602	37	7.73602	25	7.73602	23	7.73602	36	7.73602	19	7.73602	40
7.75551	25	7.75551	42	7.75551	18	7.75551	43	7.75551	26	7.75551	24	7.75551	31	7.75551	22	7.75551	23	7.75551	35	7.75551	26	7.75551	21	7.75551	31	7.75551	22	7.75551	40
7.775	17	7.775	26	7.775	26	7.775	41	7.775	19	7.775	26	7.775	24	7.775	24	7.775	21	7.775	33	7.775	23	7.775	28	7.775	25	7.775	31	7.775	43
7.79449	32	7.79449	28	7.79449	32	7.79449	39	7.79449	20	7.79449	25	7.79449	26	7.79449	22	7.79449	34	7.79449	27	7.79449	28	7.79449	19	7.79449	52	7.79449	24	7.79449	34
7.81398	23	7.81398	34	7.81398	36	7.81398	32	7.81398	22	7.81398	26	7.81398	13	7.81398	19	7.81398	31	7.81398	48	7.81398	21	7.81398	15	7.81398	30	7.81398	33	7.81398	38
7.83347	22	7.83347	28	7.83347	24	7.83347	38	7.83347	37	7.83347	20	7.83347	24	7.83347	35	7.83347	31	7.83347	23	7.83347	29	7.83347	28	7.83347	40	7.83347	33	7.83347	37
7.85296	41	7.85296	30	7.85296	26	7.85296	35	7.85296	29	7.85296	30	7.85296	21	7.85296	20	7.85296	27	7.85296	34	7.85296	22	7.85296	19	7.85296	30	7.85296	30	7.85296	39
7.87245	23	7.87245	29	7.87245	21	7.87245	32	7.87245	26	7.87245	33	7.87245	16	7.87245	22	7.87245	27	7.87245	34	7.87245	22	7.87245	29	7.87245	29	7.87245	27	7.87245	30
7.89194	24	7.89194	27	7.89194	26	7.89194	39	7.89194	24	7.89194	23	7.89194	25	7.89194	12	7.89194	30	7.89194	33	7.89194	20	7.89194	16	7.89194	29	7.89194	25	7.89194	44
7.91143	23	7.91143	29	7.91143	24	7.91143	25	7.91143	26	7.91143	26	7.91143	20	7.91143	23	7.91143	29	7.91143	22	7.91143	34	7.91143	21	7.91143	30	7.91143	24	7.91143	37
7.93091	25	7.93091	28	7.93091	27	7.93091	32	7.93091	29	7.93091	29	7.93091	18	7.93091	26	7.93091	27	7.93091	34	7.93091	25	7.93091	16	7.93091	30	7.93091	25	7.93091	33
7.9504	23	7.9504	25	7.9504	29	7.9504	43	7.9504	22	7.9504	25	7.9504	31	7.9504	12	7.9504	30	7.9504	47	7.9504	23	7.9504	19	7.9504	40	7.9504	24	7.9504	41
7.96989	29	7.96989	31	7.96989	28	7.96989	44	7.96989	30	7.96989	28	7.96989	28	7.96989	28	7.96989	22	7.96989	27	7.96989	30	7.96989	22	7.96989	38	7.96989	18	7.96989	35
7.98938	29	7.98938	32	7.98938	17	7.98938	34	7.98938	31	7.98938	26	7.98938	30	7.98938	27	7.98938	23	7.98938	43	7.98938	21	7.98938	13	7.98938	34	7.98938	17	7.98938	35
8.00887	19	8.00887	28	8.00887	30	8.00887	41	8.00887	34	8.00887	23	8.00887	25	8.00887	24	8.00887	37	8.00887	34	8.00887	21	8.00887	19	8.00887	21	8.00887	27	8.00887	46
8.02836	25	8.02836	26	8.02836	34	8.02836	31	8.02836	28	8.02836	27	8.02836	24	8.02836	23	8.02836	27	8.02836	32	8.02836	23	8.02836	24	8.02836	33	8.02836	26	8.02836	48
8.04785	22	8.04785	29	8.04785	23	8.04785	29	8.04785	28	8.04785	33	8.04785	31	8.04785	21	8.04785	22	8.04785	29	8.04785	28	8.04785	27	8.04785	25	8.04785	26	8.04785	31
8.06734	16	8.06734	22	8.06734	24	8.06734	28	8.06734	22	8.06734	24	8.06734	28	8.06734	28	8.06734	29	8.06734	21	8.06734	19	8.06734	24	8.06734	20	8.06734	30	8.06734	34
8.08683	20	8.08683	27	8.08683	25	8.08683	40	8.08683	26	8.08683	36	8.08683	12	8.08683	23	8.08683	30	8.08683	31	8.08683	30	8.08683	15	8.08683	27	8.08683	32	8.08683	29
8.10632	31	8.10632	31	8.10632	29	8.10632	35	8.10632	32	8.10632	29	8.10632	27	8.10632	18	8.10632	15	8.10632	35	8.10632	26	8.10632	19	8.10632	34	8.10632	21	8.10632	31
8.12581	24	8.12581	29	8.12581	24	8.12581	33	8.12581	18	8.12581	23	8.12581	18	8.12581	28	8.12581	29	8.12581	36	8.12581	25	8.12581	16	8.12581	35	8.12581	22	8.12581	25
8.1453	26	8.1453	31	8.1453	24	8.1453	43	8.1453	18	8.1453	24	8.1453	15	8.1453	26	8.1453	29	8.1453	33	8.1453	23	8.1453	25	8.1453	28	8.1453	26	8.1453	32
8.16479	19	8.16479	25	8.16479	30	8.16479	29	8.16479	25	8.16479	22	8.16479	20	8.16479	34	8.16479	30	8.16479	33	8.16479	21	8.16479	18	8.16479	33	8.16479	22	8.16479	46
8.18428	31	8.18428	28	8.18428	20	8.18428	35	8.18428	26	8.18428	27	8.18428	29	8.18428	32	8.18428	31	8.18428	31	8.18428	27	8.18428	13	8.18428	35	8.18428	19	8.18428	39
8.20377	32	8.20377	32	8.20377	25	8.20377	20	8.20377	28	8.20377	29	8.20377	23	8.20377	21	8.20377	29	8.20377	42	8.20377	21	8.20377	21	8.20377	33	8.20377	31	8.20377	29
8.22325	28	8.22325	30	8.22325	30	8.22325	34	8.22325	24	8.22325	20	8.22325	30	8.22325	22	8.22325	34	8.22325	33	8.22325	30	8.22325	16	8.22325	25	8.22325	30	8.22325	28
8.24274	36	8.24274	30	8.24274	29	8.24274	35	8.24274	22	8.24274	20	8.24274	17	8.24274	20	8.24274	22	8.24274	35	8.24274	18	8.24274	20	8.24274	25	8.24274	32	8.24274	31
8.26223	18	8.26223	32	8.26223	26	8.26223	41	8.26223	22	8.26223	16	8.26223	27	8.26223	18	8.26223	39	8.26223	29	8.26223	21	8.26223	19	8.26223	31	8.26223	30	8.26223	43
8.28172	19	8.28172	27	8.28172	24	8.28172	27	8.28172	22	8.28172	16	8.28172	19	8.28172	26	8.28172	23	8.28172	20	8.28172	25	8.28172	25	8.28172	35	8.28172	35	8.28172	50
8.30121	18	8.30121	30	8.30121	23	8.30121	25	8.30121	27	8.30121	20	8.30121	29	8.30121	26	8.30121	34	8.30121	25	8.30121	14	8.30121	20	8.30121	32	8.30121	29	8.30121	36
8.3207	27	8.3207	34	8.3207	13	8.3207	31	8.3207	30	8.3207	27	8.3207	20	8.3207	25	8.3207	38	8.3207	36	8.3207	22	8.3207	19	8.3207	26	8.3207	28	8.3207	47
8.34019	22	8.34019	28	8.34019	32	8.34019	31	8.34019	35	8.34019	26	8.34019	19	8.34019	24	8.34019	27	8.34019	30	8.34019	22	8.34019	16	8.34019	22	8.34019	36	8.34019	31
8.35968	19	8.35968	29	8.35968	25	8.35968	36	8.35968	30	8.35968	17	8.35968	25	8.35968	21	8.35968	37	8.35968	23	8.35968	16	8.35968	21	8.35968	36	8.35968	19	8.35968	43
8.37917	19	8.37917	26	8.37917	26	8.37917	32	8.37917	26	8.37917	17	8.37917	22	8.37917	23	8.37917	19	8.37917	35	8.37917	19	8.37917	18	8.37917	30	8.37917	28	8.37917	33
8.39866	13	8.39866	27	8.39866	22	8.39866	35	8.39866	29	8.39866	18	8.39866	21	8.39866	20	8.39866	42	8.39866	36	8.39866	24	8.39866	28	8.39866	31	8.39866	19	8.39866	36
8.41815	24	8.41815	24	8.41815	24	8.41815	34	8.41815	23	8.41815	22	8.41815	25	8.41815	17	8.41815	28	8.41815	29	8.41815	31	8.41815	19	8.41815	21	8.41815	34	8.41815	33
8.43764	24	8.43764	31	8.43764	29	8.43764	32	8.43764	22	8.43764	39	8.43764	18	8.43764	21	8.43764	30	8.43764	39	8.43764	39	8.43764	17	8.43764	28	8.43764	27	8.43764	35
8.45713	27	8.45713	32	8.45713	22	8.45713	27	8.45713	21	8.45713	28	8.45713	20	8.45713	22	8.45713	24	8.45713	40	8.45713	23	8.45713	31	8.45713	32	8.45713	26	8.45713	18
8.47662	28	8.47662	30	8.47662	30	8.47662	28	8.47662	30	8.47662	34	8.47662	24	8.47662	29	8.47662	30	8.47662	30	8.47662	23	8.47662	17	8.47662	29	8.47662	19	8.47662	40
8.49611	20	8.49611	41	8.49611	26	8.49611	26	8.49611	26	8.49611	37	8.49611	22	8.49611	22	8.49611	25	8.49611	36	8.49611	25	8.49611	17	8.49611	26	8.49611	26	8.49611	38
8.5156	21	8.5156	36	8.5156	18	8.5156	26	8.5156	21	8.5156	23	8.5156	26	8.5156	23	8.5156	33	8.5156	37	8.5156	30	8.5156	29	8.5156	37	8.5156	25	8.5156	32
8.53509	21	8.53509	28	8.53509	28	8.53509	35	8.53509	25	8.53509	28	8.53509	32	8.53509	19	8.53509	29	8.53509	36	8.53509	23	8.53509	22	8.53509	31	8.53509	28	8.53509	34
8.55457	23	8.55457	35	8.55457	22	8.55457	26	8.55457	20	8.55457	28	8.55457	26	8.55457	21	8.55457	27	8.55457	30	8.55457	27	8.55457	14	8.55457	38	8.55457	27	8.55457	33
8.57406	30	8.57406	28	8.57406	14	8.57406	30	8.57406	26	8.57406	21	8.57406	24	8.57406	25	8.57406	29	8.57406	33	8.57406	24	8.57406	15	8.57406	26	8.57406	28	8.57406	38
8.59355	17	8.59355	24	8.59355	25	8.59355	33	8.59355	21	8.59355	26	8.59355	29	8.59355	19	8.59355	29	8.59355	38	8.59355	25	8.59355	24	8.59355	31	8.59355	20	8.59355	36
8.61304	33	8.61304	27	8.61304	27	8.61304	28	8.61304	22	8.61304	20	8.61304	13	8.61304	20	8.61304	33	8.61304	23	8.61304	24	8.61304	25	8.61304	23	8.61304	29	8.61304	24
8.63253	11	8.63253	23	8.63253	28	8.63253	33	8.63253	18	8.63253	23	8.63253	24	8.63253	23	8.63253	29	8.63253	36	8.63253	32	8.63253	22	8.63253	30	8.63253	23	8.63253	44
8.65202	22	8.65202	19	8.65202	22	8.65202	30	8.65202	22	8.65202	26	8.65202	22	8.65202	17	8.65202	24	8.65202	26	8.65202	30	8.65202	20	8.65202	28	8.65202	26	8.65202	33
8.67151	24	8.67151	28	8.67151	24	8.67151	22	8.67151	22	8.67151	24	8.67151	21	8.67151	24	8.67151	26	8.67151	21	8.67151	28	8.67151	21	8.67151	30	8.67151	36	8.67151	38
8.691	25	8.691	35	8.691	32	8.691	16	8.691	23	8.691	33	8.691	27	8.691	22	8.691	28	8.691	27	8.691	26	8.691	15	8.691	29	8.691	23	8.691	30
8.71049	20	8.71049	29	8.71049	28	8.71049	37	8.71049	27	8.71049	41	8.71049	33	8.71049	26	8.71049	31	8.71049	32	8.71049	23	8.71049	24	8.71049	29	8.71049	17	8.71049	35
8.72998	20	8.72998	27	8.72998	26	8.72998	31	8.72998	15	8.72998	18	8.72998	30	8.72998	21	8.72998	33	8.72998	37	8.72998	34	8.72998	24	8.72998	34	8.72998	15	8.72998	43
8.74947	17	8.74947	30	8.74947	27	8.74947	31	8.74947	22	8.74947	17	8.74947	28	8.74947	23	8.74947	21	8.74947	35	8.74947	20	8.74947	18	8.74947	28	8.74947	24	8.74947	41
8.76896	19	8.76896	27	8.76896	23	8.76896	34	8.76896	20	8.76896	27	8.76896	26	8.76896	26	8.76896	39	8.76896	32	8.76896	23	8.76896	23	8.76896	28	8.76896	22	8.76896	24
8.78845	27	8.78845	29	8.78845	30	8.78845	31	8.78845	28	8.78845	20	8.78845	27	8.78845	36	8.78845	29	8.78845	39	8.78845	26	8.78845	24	8.78845	42	8.78845	28	8.78845	39
8.80794	29	8.80794	24	8.80794	33	8.80794	31	8.80794	23	8.80794	30	8.80794	19	8.80794	22	8.80794	18	8.80794	30	8.80794	29	8.80794	22	8.80794	25	8.80794	16	8.80794	46
8.82743	21	8.82743	22	8.82743	21	8.82743	29	8.82743	34	8.82743	22	8.82743	20	8.82743	25	8.82743	33	8.82743	34	8.82743	18	8.82743	25	8.82743	30	8.82743	33	8.82743	36
8.84692	18	8.84692	22	8.84692	23	8.84692	17	8.84692	24	8.84692	24	8.84692	28	8.84692	29	8.84692	32	8.84692	34	8.84692	25	8.84692	25	8.84692	33	8.84692	29	8.84692	35
8.86641	16	8.86641	29	8.86641	19	8.86641	40	8.86641	31	8.86641	16	8.86641	26	8.86641	24	8.86641	28	8.86641	34	8.86641	22	8.86641	22	8.86641	37	8.86641	30	8.86641	32
8.88589	24	8.88589	33	8.88589	35	8.88589	34	8.88589	34	8.88589	22	8.88589	31	8.88589	26	8.88589	31	8.88589	33	8.88589	29	8.88589	25	8.88589	29	8.88589	32	8.88589	47
8.90538	19	8.90538	31	8.90538	31	8.90538	26	8.90538	23	8.90538	21	8.90538	29	8.90538	21	8.90538	24	8.90538	30	8.90538	31	8.90538	23	8.90538	39	8.90538	23	8.90538	43
8.92487	20	8.92487	28	8.92487	24	8.92487	23	8.92487	32	8.92487	28	8.92487	14	8.92487	22	8.92487	31	8.92487	28	8.92487	30	8.92487	19	8.92487	25	8.92487	31	8.92487	30
8.94436	25	8.94436	28	8.94436	33	8.94436	29	8.94436	23	8.94436	33	8.94436	21	8.94436	19	8.94436	19	8.94436	24	8.94436	21	8.94436	21	8.94436	34	8.94436	26	8.94436	36
8.96385	25	8.96385	28	8.96385	17	8.96385	31	8.96385	20	8.96385	24	8.96385	20	8.96385	26	8.96385	26	8.96385	28	8.96385	26	8.96385	19	8.96385	34	8.96385	23	8.96385	36
8.98334	21	8.98334	28	8.98334	26	8.98334	33	8.98334	19	8.98334	21	8.98334	27	8.98334	30	8.98334	16	8.98334	22	8.98334	26	8.98334	13	8.98334	39	8.98334	25	8.98334	38
9.00283	22	9.00283	19	9.00283	33	9.00283	24	9.00283	33	9.00283	24	9.00283	19	9.00283	15	9.00283	36	9.00283	25	9.00283	30	9.00283	18	9.00283	32	9.00283	22	9.00283	29
9.02232	29	9.02232	20	9.02232	24	9.02232	32	9.02232	25	9.02232	32	9.02232	25	9.02232	22	9.02232	23	9.02232	31	9.02232	17	9.02232	19	9.02232	32	9.02232	26	9.02232	37
9.04181	27	9.04181	25	9.04181	23	9.04181	36	9.04181	30	9.04181	20	9.04181	19	9.04181	18	9.04181	26	9.04181	33	9.04181	30	9.04181	28	9.04181	32	9.04181	23	9.04181	41
9.0613	21	9.0613	25	9.0613	33	9.0613	21	9.0613	25	9.0613	24	9.0613	21	9.0613	37	9.0613	29	9.0613	26	9.0613	26	9.0613	15	9.0613	36	9.0613	21	9.0613	32
9.08079	21	9.08079	28	9.08079	20	9.08079	27	9.08079	28	9.08079	26	9.08079	14	9.08079	27	9.08079	31	9.08079	35	9.08079	30	9.08079	16	9.08079	38	9.08079	32	9.08079	30
9.10028	22	9.10028	24	9.10028	25	9.10028	37	9.10028	27	9.10028	25	9.10028	13	9.10028	22	9.10028	28	9.10028	36	9.10028	23	9.10028	18	9.10028	28	9.10028	15	9.10028	39
9.11977	20	9.11977	25	9.11977	25	9.11977	24	9.11977	22	9.11977	25	9.11977	24	9.11977	13	9.11977	30	9.11977	33	9.11977	20	9.11977	20	9.11977	27	9.11977	17	9.11977	34
9.13926	27	9.13926	28	9.13926	25	9.13926	28	9.13926	19	9.13926	25	9.13926	22	9.13926	23	9.13926	17	9.13926	35	9.13926	27	9.13926	18	9.13926	32	9.13926	17	9.13926	37
9.15875	31	9.15875	27	9.15875	27	9.15875	18	9.15875	23	9.15875	22	9.15875	22	9.15875	27	9.15875	26	9.15875	33	9.15875	30	9.15875	24	9.15875	25	9.15875	27	9.15875	27
9.17823	22	9.17823	26	9.17823	27	9.17823	41	9.17823	17	9.17823	23	9.17823	21	9.17823	26	9.17823	21	9.17823	37	9.17823	26	9.17823	11	9.17823	32	9.17823	17	9.17823	35
9.19772	21	9.19772	28	9.19772	26	9.19772	34	9.19772	30	9.19772	24	9.19772	16	9.19772	11	9.19772	30	9.19772	38	9.19772	23	9.19772	22	9.19772	28	9.19772	21	9.19772	27
9.21721	20	9.21721	33	9.21721	32	9.21721	31	9.21721	23	9.21721	22	9.21721	22	9.21721	18	9.21721	13	9.21721	29	9.21721	17	9.21721	26	9.21721	31	9.21721	24	9.21721	43
9.2367	21	9.2367	31	9.2367	27	9.2367	27	9.2367	26	9.2367	30	9.2367	19	9.2367	22	9.2367	27	9.2367	32	9.2367	22	9.2367	25	9.2367	29	9.2367	26	9.2367	43
9.25619	29	9.25619	29	9.25619	23	9.25619	26	9.25619	29	9.25619	27	9.25619	18	9.25619	24	9.25619	31	9.25619	25	9.25619	22	9.25619	17	9.25619	39	9.25619	25	9.25619	32
9.27568	25	9.27568	30	9.27568	19	9.27568	19	9.27568	21	9.27568	29	9.27568	24	9.27568	15	9.27568	34	9.27568	30	9.27568	29	9.27568	26	9.27568	30	9.27568	24	9.27568	37
9.29517	19	9.29517	20	9.29517	22	9.29517	30	9.29517	25	9.29517	31	9.29517	22	9.29517	14	9.29517	30	9.29517	35	9.29517	20	9.29517	13	9.29517	38	9.29517	25	9.29517	26
9.31466	21	9.31466	14	9.31466	23	9.31466	31	9.31466	23	9.31466	34	9.31466	26	9.31466	21	9.31466	34	9.31466	27	9.31466	20	9.31466	20	9.31466	39	9.31466	16	9.31466	30
9.33415	32	9.33415	29	9.33415	15	9.33415	29	9.33415	23	9.33415	20	9.33415	18	9.33415	22	9.33415	26	9.33415	31	9.33415	23	9.33415	20	9.33415	37	9.33415	19	9.33415	34
9.35364	24	9.35364	31	9.35364	20	9.35364	32	9.35364	29	9.35364	25	9.35364	27	9.35364	29	9.35364	32	9.35364	30	9.35364	20	9.35364	16	9.35364	35	9.35364	30	9.35364	21
9.37313	21	9.37313	34	9.37313	32	9.37313	24	9.37313	27	9.37313	17	9.37313	19	9.37313	26	9.37313	29	9.37313	39	9.37313	21	9.37313	25	9.37313	29	9.37313	23	9.37313	35
9.39262	19	9.39262	27	9.39262	21	9.39262	29	9.39262	22	9.39262	28	9.39262	11	9.39262	31	9.39262	29	9.39262	32	9.39262	23	9.39262	24	9.39262	29	9.39262	19	9.39262	39
9.41211	21	9.41211	28	9.41211	27	9.41211	34	9.41211	30	9.41211	19	9.41211	25	9.41211	21	9.41211	27	9.41211	38	9.41211	17	9.41211	13	9.41211	36	9.41211	31	9.41211	43
9.4316	21	9.4316	28	9.4316	17	9.4316	21	9.4316	29	9.4316	22	9.4316	18	9.4316	27	9.4316	26	9.4316	33	9.4316	21	9.4316	20	9.4316	31	9.4316	33	9.4316	25
9.45109	26	9.45109	19	9.45109	26	9.45109	28	9.45109	32	9.45109	19	9.45109	17	9.45109	23	9.45109	25	9.45109	41	9.45109	30	9.45109	25	9.45109	30	9.45109	22	9.45109	36
9.47058	17	9.47058	20	9.47058	28	9.47058	37	9.47058	32	9.47058	24	9.47058	29	9.47058	20	9.47058	25	9.47058	35	9.47058	24	9.47058	14	9.47058	29	9.47058	21	9.47058	24
9.49007	16	9.49007	26	9.49007	18	9.49007	33	9.49007	25	9.49007	19	9.49007	21	9.49007	25	9.49007	31	9.49007	29	9.49007	24	9.49007	20	9.49007	32	9.49007	18	9.49007	25
9.50955	24	9.50955	38	9.50955	21	9.50955	34	9.50955	16	9.50955	19	9.50955	24	9.50955	25	9.50955	28	9.50955	31	9.50955	23	9.50955	26	9.50955	34	9.50955	31	9.50955	33
9.52904	24	9.52904	34	9.52904	26	9.52904	28	9.52904	24	9.52904	20	9.52904	25	9.52904	22	9.52904	21	9.52904	23	9.52904	27	9.52904	16	9.52904	30	9.52904	36	9.52904	38
9.54853	24	9.54853	33	9.54853	21	9.54853	17	9.54853	28	9.54853	19	9.54853	18	9.54853	23	9.54853	29	9.54853	40	9.54853	15	9.54853	22	9.54853	30	9.54853	31	9.54853	37
9.56802	20	9.56802	39	9.56802	29	9.56802	39	9.56802	21	9.56802	27	9.56802	22	9.56802	21	9.56802	33	9.56802	32	9.56802	28	9.56802	21	9.56802	22	9.56802	20	9.56802	36
9.58751	30	9.58751	26	9.58751	20	9.58751	28	9.58751	29	9.58751	20	9.58751	24	9.58751	25	9.58751	36	9.58751	38	9.58751	21	9.58751	15	9.58751	23	9.58751	24	9.58751	35
9.607	20	9.607	24	9.607	26	9.607	38	9.607	25	9.607	19	9.607	21	9.607	18	9.607	24	9.607	22	9.607	24	9.607	27	9.607	38	9.607	27	9.607	38
9.62649	24	9.62649	30	9.62649	27	9.62649	26	9.62649	23	9.62649	26	9.62649	14	9.62649	25	9.62649	29	9.62649	32	9.62649	20	9.62649	18	9.62649	31	9.62649	26	9.62649	39
9.64598	20	9.64598	29	9.64598	21	9.64598	27	9.64598	31	9.64598	21	9.64598	22	9.64598	30	9.64598	30	9.64598	30	9.64598	22	9.64598	19	9.64598	31	9.64598	17	9.64598	38
9.66547	15	9.66547	23	9.66547	24	9.66547	28	9.66547	23	9.66547	20	9.66547	26	9.66547	25	9.66547	27	9.66547	37	9.66547	16	9.66547	14	9.66547	33	9.66547	21	9.66547	24
9.68496	21	9.68496	30	9.68496	33	9.68496	31	9.68496	27	9.68496	24	9.68496	29	9.68496	28	9.68496	41	9.68496	31	9.68496	29	9.68496	17	9.68496	37	9.68496	21	9.68496	30
9.70445	25	9.70445	27	9.70445	37	9.70445	29	9.70445	20	9.70445	22	9.70445	24	9.70445	17	9.70445	24	9.70445	32	9.70445	18	9.70445	27	9.70445	38	9.70445	23	9.70445	27
9.72394	20	9.72394	32	9.72394	32	9.72394	33	9.72394	29	9.72394	33	9.72394	21	9.72394	23	9.72394	28	9.72394	44	9.72394	21	9.72394	14	9.72394	22	9.72394	25	9.72394	36
9.74343	26	9.74343	27	9.74343	27	9.74343	19	9.74343	20	9.74343	27	9.74343	14	9.74343	21	9.74343	24	9.74343	29	9.74343	31	9.74343	20	9.74343	32	9.74343	26	9.74343	23
9.76292	14	9.76292	28	9.76292	25	9.76292	34	9.76292	30	9.76292	15	9.76292	21	9.76292	35	9.76292	28	9.76292	36	9.76292	29	9.76292	18	9.76292	36	9.76292	28	9.76292	38
9.78241	22	9.78241	37	9.78241	21	9.78241	25	9.78241	27	9.78241	18	9.78241	27	9.78241	32	9.78241	29	9.78241	39	9.78241	25	9.78241	21	9.78241	50	9.78241	28	9.78241	32
9.8019	27	9.8019	29	9.8019	31	9.8019	27	9.8019	32	9.8019	34	9.8019	24	9.8019	23	9.8019	27	9.8019	29	9.8019	33	9.8019	20	9.8019	48	9.8019	24	9.8019	43
9.82138	22	9.82138	22	9.82138	16	9.82138	36	9.82138	29	9.82138	19	9.82138	26	9.82138	25	9.82138	30	9.82138	29	9.82138	22	9.82138	20	9.82138	29	9.82138	34	9.82138	40
9.84087	25	9.84087	20	9.84087	27	9.84087	33	9.84087	23	9.84087	17	9.84087	25	9.84087	25	9.84087	23	9.84087	39	9.84087	18	9.84087	20	9.84087	37	9.84087	19	9.84087	25
9.86036	19	9.86036	25	9.86036	25	9.86036	28	9.86036	30	9.86036	30	9.86036	14	9.86036	23	9.86036	29	9.86036	33	9.86036	21	9.86036	16	9.86036	38	9.86036	23	9.86036	35
9.87985	29	9.87985	22	9.87985	24	9.87985	36	9.87985	23	9.87985	27	9.87985	19	9.87985	29	9.87985	25	9.87985	39	9.87985	31	9.87985	21	9.87985	37	9.87985	31	9.87985	36
9.89934	24	9.89934	32	9.89934	22	9.89934	32	9.89934	25	9.89934	29	9.89934	18	9.89934	20	9.89934	32	9.89934	42	9.89934	27	9.89934	22	9.89934	38	9.89934	24	9.89934	41
9.91883	22	9.91883	36	9.91883	32	9.91883	33	9.91883	17	9.91883	28	9.91883	31	9.91883	36	9.91883	28	9.91883	29	9.91883	18	9.91883	27	9.91883	23	9.91883	27	9.91883	50
9.93832	21	9.93832	31	9.93832	24	9.93832	22	9.93832	24	9.93832	21	9.93832	27	9.93832	22	9.93832	26	9.93832	30	9.93832	25	9.93832	18	9.93832	32	9.93832	21	9.93832	27
9.95781	21	9.95781	36	9.95781	21	9.95781	37	9.95781	16	9.95781	26	9.95781	16	9.95781	20	9.95781	26	9.95781	42	9.95781	25	9.95781	23	9.95781	40	9.95781	33	9.95781	41
9.9773	27	9.9773	32	9.9773	27	9.9773	28	9.9773	28	9.9773	25	9.9773	28	9.9773	23	9.9773	25	9.9773	30	9.9773	18	9.9773	22	9.9773	37	9.9773	29	9.9773	47
9.99679	25	9.99679	36	9.99679	22	9.99679	34	9.99679	27	9.99679	23	9.99679	27	9.99679	28	9.99679	26	9.99679	42	9.99679	28	9.99679	17	9.99679	29	9.99679	30	9.99679	37
10.0163	17	10.0163	38	10.0163	21	10.0163	34	10.0163	26	10.0163	26	10.0163	32	10.0163	28	10.0163	32	10.0163	32	10.0163	28	10.0163	10	10.0163	35	10.0163	25	10.0163	44
10.0358	30	10.0358	30	10.0358	23	10.0358	29	10.0358	32	10.0358	26	10.0358	20	10.0358	25	10.0358	27	10.0358	38	10.0358	19	10.0358	16	10.0358	37	10.0358	32	10.0358	38
10.0552	28	10.0552	18	10.0552	20	10.0552	43	10.0552	21	10.0552	25	10.0552	15	10.0552	17	10.0552	29	10.0552	30	10.0552	23	10.0552	16	10.0552	27	10.0552	24	10.0552	35
10.0747	27	10.0747	28	10.0747	33	10.0747	35	10.0747	20	10.0747	35	10.0747	20	10.0747	25	10.0747	41	10.0747	37	10.0747	21	10.0747	25	10.0747	32	10.0747	18	10.0747	46
10.0942	31	10.0942	34	10.0942	26	10.0942	33	10.0942	18	10.0942	26	10.0942	25	10.0942	17	10.0942	28	10.0942	38	10.0942	27	10.0942	21	10.0942	30	10.0942	39	10.0942	39
10.1137	24	10.1137	36	10.1137	26	10.1137	36	10.1137	26	10.1137	21	10.1137	34	10.1137	34	10.1137	35	10.1137	39	10.1137	23	10.1137	20	10.1137	40	10.1137	23	10.1137	53
10.1332	27	10.1332	28	10.1332	18	10.1332	39	10.1332	22	10.1332	24	10.1332	34	10.1332	31	10.1332	32	10.1332	27	10.1332	22	10.1332	26	10.1332	26	10.1332	29	10.1332	55
10.1527	41	10.1527	22	10.1527	31	10.1527	30	10.1527	30	10.1527	21	10.1527	24	10.1527	26	10.1527	37	10.1527	35	10.1527	29	10.1527	28	10.1527	40	10.1527	29	10.1527	58
10.1722	25	10.1722	29	10.1722	33	10.1722	40	10.1722	23	10.1722	38	10.1722	27	10.1722	24	10.1722	28	10.1722	31	10.1722	29	10.1722	23	10.1722	39	10.1722	35	10.1722	56
10.1917	22	10.1917	39	10.1917	23	10.1917	25	10.1917	33	10.1917	18	10.1917	21	10.1917	26	10.1917	23	10.1917	38	10.1917	19	10.1917	19	10.1917	38	10.1917	37	10.1917	51
10.2112	24	10.2112	33	10.2112	23	10.2112	27	10.2112	29	10.2112	27	10.2112	28	10.2112	26	10.2112	31	10.2112	30	10.2112	26	10.2112	21	10.2112	41	10.2112	31	10.2112	64
10.2307	33	10.2307	32	10.2307	28	10.2307	33	10.2307	35	10.2307	21	10.2307	23	10.2307	29	10.2307	36	10.2307	41	10.2307	23	10.2307	22	10.2307	30	10.2307	28	10.2307	57
10.2501	17	10.2501	28	10.2501	25	10.2501	25	10.2501	31	10.2501	21	10.2501	25	10.2501	25	10.2501	31	10.2501	29	10.2501	26	10.2501	23	10.2501	34	10.2501	36	10.2501	39
10.2696	20	10.2696	26	10.2696	30	10.2696	32	10.2696	29	10.2696	23	10.2696	26	10.2696	18	10.2696	30	10.2696	38	10.2696	27	10.2696	29	10.2696	32	10.2696	27	10.2696	43
10.2891	32	10.2891	38	10.2891	25	10.2891	35	10.2891	25	10.2891	26	10.2891	29	10.2891	19	10.2891	29	10.2891	32	10.2891	24	10.2891	22	10.2891	39	10.2891	26	10.2891	57
10.3086	37	10.3086	39	10.3086	24	10.3086	31	10.3086	44	10.3086	29	10.3086	34	10.3086	17	10.3086	36	10.3086	42	10.3086	26	10.3086	21	10.3086	46	10.3086	32	10.3086	41
10.3281	32	10.3281	32	10.3281	29	10.3281	36	10.3281	28	10.3281	25	10.3281	30	10.3281	37	10.3281	43	10.3281	35	10.3281	33	10.3281	22	10.3281	43	10.3281	37	10.3281	35
10.3476	25	10.3476	39	10.3476	31	10.3476	48	10.3476	33	10.3476	28	10.3476	33	10.3476	33	10.3476	42	10.3476	26	10.3476	39	10.3476	24	10.3476	50	10.3476	26	10.3476	31
10.3671	40	10.3671	35	10.3671	17	10.3671	34	10.3671	19	10.3671	33	10.3671	24	10.3671	25	10.3671	28	10.3671	28	10.3671	37	10.3671	24	10.3671	36	10.3671	43	10.3671	50
10.3866	23	10.3866	44	10.3866	37	10.3866	42	10.3866	34	10.3866	28	10.3866	28	10.3866	25	10.3866	41	10.3866	43	10.3866	34	10.3866	30	10.3866	33	10.3866	33	10.3866	51
10.4061	30	10.4061	31	10.4061	27	10.4061	35	10.4061	33	10.4061	19	10.4061	26	10.4061	24	10.4061	36	10.4061	39	10.4061	34	10.4061	23	10.4061	43	10.4061	38	10.4061	47
10.4255	42	10.4255	43	10.4255	22	10.4255	43	10.4255	33	10.4255	31	10.4255	34	10.4255	27	10.4255	32	10.4255	34	10.4255	35	10.4255	17	10.4255	58	10.4255	29	10.4255	42
10.445	49	10.445	55	10.445	36	10.445	56	10.445	35	10.445	26	10.445	42	10.445	37	10.445	34	10.445	48	10.445	37	10.445	25	10.445	44	10.445	28	10.445	43
10.4645	22	10.4645	28	10.4645	30	10.4645	42	10.4645	31	10.4645	21	10.4645	33	10.4645	26	10.4645	38	10.4645	39	10.4645	29	10.4645	17	10.4645	54	10.4645	36	10.4645	43
10.484	36	10.484	40	10.484	33	10.484	35	10.484	40	10.484	29	10.484	19	10.484	15	10.484	40	10.484	39	10.484	29	10.484	24	10.484	41	10.484	43	10.484	41
10.5035	38	10.5035	42	10.5035	29	10.5035	35	10.5035	48	10.5035	39	10.5035	29	10.5035	26	10.5035	42	10.5035	47	10.5035	30	10.5035	43	10.5035	35	10.5035	41	10.5035	40
10.523	33	10.523	36	10.523	36	10.523	44	10.523	28	10.523	31	10.523	27	10.523	35	10.523	49	10.523	49	10.523	42	10.523	26	10.523	51	10.523	41	10.523	50
10.5425	39	10.5425	32	10.5425	40	10.5425	37	10.5425	43	10.5425	33	10.5425	28	10.5425	29	10.5425	47	10.5425	54	10.5425	43	10.5425	25	10.5425	36	10.5425	33	10.5425	54
10.562	42	10.562	41	10.562	45	10.562	40	10.562	40	10.562	32	10.562	26	10.562	37	10.562	50	10.562	34	10.562	50	10.562	36	10.562	45	10.562	32	10.562	40
10.5815	42	10.5815	45	10.5815	30	10.5815	57	10.5815	35	10.5815	29	10.5815	32	10.5815	30	10.5815	44	10.5815	53	10.5815	35	10.5815	45	10.5815	51	10.5815	43	10.5815	39
10.601	45	10.601	27	10.601	31	10.601	44	10.601	41	10.601	40	10.601	27	10.601	30	10.601	57	10.601	68	10.601	56	10.601	40	10.601	55	10.601	51	10.601	39
10.6204	58	10.6204	42	10.6204	24	10.6204	51	10.6204	41	10.6204	34	10.6204	31	10.6204	29	10.6204	36	10.6204	44	10.6204	43	10.6204	33	10.6204	47	10.6204	44	10.6204	47
10.6399	53	10.6399	28	10.6399	35	10.6399	50	10.6399	39	10.6399	52	10.6399	40	10.6399	30	10.6399	40	10.6399	51	10.6399	46	10.6399	47	10.6399	44	10.6399	35	10.6399	59
10.6594	46	10.6594	34	10.6594	35	10.6594	48	10.6594	48	10.6594	47	10.6594	28	10.6594	33	10.6594	41	10.6594	51	10.6594	54	10.6594	60	10.6594	66	10.6594	48	10.6594	61
10.6789	43	10.6789	50	10.6789	40	10.6789	45	10.6789	55	10.6789	44	10.6789	27	10.6789	33	10.6789	49	10.6789	54	10.6789	35	10.6789	52	10.6789	53	10.6789	38	10.6789	57
10.6984	53	10.6984	48	10.6984	43	10.6984	47	10.6984	47	10.6984	38	10.6984	29	10.6984	29	10.6984	58	10.6984	46	10.6984	54	10.6984	50	10.6984	66	10.6984	53	10.6984	53
10.7179	48	10.7179	38	10.7179	56	10.7179	43	10.7179	56	10.7179	48	10.7179	33	10.7179	34	10.7179	61	10.7179	57	10.7179	47	10.7179	55	10.7179	57	10.7179	46	10.7179	46
10.7374	55	10.7374	38	10.7374	50	10.7374	53	10.7374	64	10.7374	44	10.7374	32	10.7374	33	10.7374	46	10.7374	63	10.7374	55	10.7374	67	10.7374	50	10.7374	52	10.7374	42
10.7569	54	10.7569	36	10.7569	42	10.7569	50	10.7569	50	10.7569	46	10.7569	26	10.7569	36	10.7569	71	10.7569	64	10.7569	57	10.7569	91	10.7569	47	10.7569	48	10.7569	48
10.7764	55	10.7764	56	10.7764	46	10.7764	41	10.7764	41	10.7764	45	10.7764	30	10.7764	37	10.7764	50	10.7764	71	10.7764	62	10.7764	76	10.7764	49	10.7764	50	10.7764	53
10.7958	49	10.7958	42	10.7958	53	10.7958	47	10.7958	65	10.7958	52	10.7958	37	10.7958	49	10.7958	57	10.7958	60	10.7958	46	10.7958	105	10.7958	53	10.7958	35	10.7958	39
10.8153	43	10.8153	52	10.8153	33	10.8153	37	10.8153	56	10.8153	38	10.8153	21	10.8153	27	10.8153	50	10.8153	72	10.8153	57	10.8153	97	10.8153	61	10.8153	38	10.8153	45
10.8348	53	10.8348	43	10.8348	44	10.8348	43	10.8348	48	10.8348	33	10.8348	34	10.8348	32	10.8348	72	10.8348	59	10.8348	57	10.8348	112	10.8348	52	10.8348	51	10.8348	55
10.8543	63	10.8543	34	10.8543	37	10.8543	38	10.8543	49	10.8543	41	10.8543	43	10.8543	30	10.8543	57	10.8543	73	10.8543	57	10.8543	111	10.8543	46	10.8543	50	10.8543	46
10.8738	41	10.8738	53	10.8738	62	10.8738	48	10.8738	48	10.8738	45	10.8738	22	10.8738	39	10.8738	53	10.8738	67	10.8738	43	10.8738	91	10.8738	62	10.8738	37	10.8738	39
10.8933	45	10.8933	36	10.8933	45	10.8933	50	10.8933	62	10.8933	41	10.8933	33	10.8933	36	10.8933	57	10.8933	50	10.8933	50	10.8933	77	10.8933	60	10.8933	37	10.8933	49
10.9128	44	10.9128	39	10.9128	32	10.9128	49	10.9128	40	10.9128	52	10.9128	32	10.9128	38	10.9128	60	10.9128	52	10.9128	69	10.9128	66	10.9128	65	10.9128	50	10.9128	52
10.9323	51	10.9323	38	10.9323	48	10.9323	37	10.9323	44	10.9323	48	10.9323	26	10.9323	31	10.9323	55	10.9323	58	10.9323	58	10.9323	48	10.9323	37	10.9323	41	10.9323	56
10.9518	47	10.9518	41	10.9518	47	10.9518	47	10.9518	55	10.9518	48	10.9518	21	10.9518	43	10.9518	42	10.9518	47	10.9518	58	10.9518	64	10.9518	44	10.9518	43	10.9518	44
10.9712	26	10.9712	33	10.9712	41	10.9712	34	10.9712	46	10.9712	27	10.9712	33	10.9712	33	10.9712	47	10.9712	47	10.9712	49	10.9712	42	10.9712	50	10.9712	37	10.9712	45
10.9907	41	10.9907	40	10.9907	45	10.9907	45	10.9907	39	10.9907	46	10.9907	26	10.9907	31	10.9907	37	10.9907	45	10.9907	37	10.9907	38	10.9907	52	10.9907	37	10.9907	42
11.0102	42	11.0102	31	11.0102	31	11.0102	27	11.0102	39	11.0102	45	11.0102	26	11.0102	23	11.0102	35	11.0102	47	11.0102	41	11.0102	45	11.0102	45	11.0102	37	11.0102	43
11.0297	33	11.0297	36	11.0297	32	11.0297	33	11.0297	25	11.0297	30	11.0297	30	11.0297	32	11.0297	42	11.0297	44	11.0297	32	11.0297	35	11.0297	39	11.0297	39	11.0297	36
11.0492	44	11.0492	34	11.0492	31	11.0492	47	11.0492	33	11.0492	28	11.0492	34	11.0492	24	11.0492	42	11.0492	36	11.0492	37	11.0492	28	11.0492	50	11.0492	33	11.0492	47
11.0687	24	11.0687	40	11.0687	33	11.0687	42	11.0687	33	11.0687	33	11.0687	24	11.0687	33	11.0687	47	11.0687	33	11.0687	36	11.0687	32	11.0687	37	11.0687	32	11.0687	49
11.0882	26	11.0882	36	11.0882	31	11.0882	50	11.0882	40	11.0882	30	11.0882	30	11.0882	35	11.0882	38	11.0882	44	11.0882	28	11.0882	27	11.0882	33	11.0882	33	11.0882	47
11.1077	35	11.1077	33	11.1077	26	11.1077	31	11.1077	28	11.1077	28	11.1077	29	11.1077	25	11.1077	25	11.1077	33	11.1077	28	11.1077	28	11.1077	35	11.1077	25	11.1077	34
11.1272	34	11.1272	32	11.1272	30	11.1272	46	11.1272	31	11.1272	36	11.1272	25	11.1272	21	11.1272	31	11.1272	37	11.1272	39	11.1272	28	11.1272	38	11.1272	30	11.1272	40
11.1467	33	11.1467	28	11.1467	20	11.1467	45	11.1467	26	11.1467	27	11.1467	22	11.1467	28	11.1467	38	11.1467	34	11.1467	27	11.1467	30	11.1467	38	11.1467	37	11.1467	38
11.1662	20	11.1662	32	11.1662	25	11.1662	32	11.1662	25	11.1662	34	11.1662	23	11.1662	26	11.1662	40	11.1662	37	11.1662	24	11.1662	21	11.1662	43	11.1662	26	11.1662	37
11.1856	19	11.1856	39	11.1856	35	11.1856	40	11.1856	27	11.1856	30	11.1856	30	11.1856	33	11.1856	36	11.1856	38	11.1856	33	11.1856	25	11.1856	39	11.1856	26	11.1856	31
11.2051	30	11.2051	30	11.2051	22	11.2051	25	11.2051	32	11.2051	19	11.2051	26	11.2051	22	11.2051	27	11.2051	29	11.2051	41	11.2051	19	11.2051	34	11.2051	24	11.2051	36
11.2246	25	11.2246	36	11.2246	30	11.2246	27	11.2246	19	11.2246	25	11.2246	24	11.2246	22	11.2246	41	11.2246	27	11.2246	32	11.2246	25	11.2246	36	11.2246	31	11.2246	25
11.2441	20	11.2441	38	11.2441	30	11.2441	24	11.2441	32	11.2441	20	11.2441	17	11.2441	33	11.2441	47	11.2441	36	11.2441	30	11.2441	20	11.2441	39	11.2441	21	11.2441	39
11.2636	26	11.2636	32	11.2636	18	11.2636	26	11.2636	23	11.2636	26	11.2636	20	11.2636	23	11.2636	33	11.2636	27	11.2636	32	11.2636	16	11.2636	41	11.2636	30	11.2636	44
11.2831	21	11.2831	39	11.2831	21	11.2831	33	11.2831	27	11.2831	26	11.2831	22	11.2831	31	11.2831	31	11.2831	27	11.2831	16	11.2831	18	11.2831	34	11.2831	20	11.2831	23
11.3026	25	11.3026	23	11.3026	21	11.3026	26	11.3026	26	11.3026	24	11.3026	21	11.3026	20	11.3026	31	11.3026	44	11.3026	36	11.3026	20	11.3026	33	11.3026	19	11.3026	42
11.3221	20	11.3221	26	11.3221	26	11.3221	22	11.3221	14	11.3221	26	11.3221	26	11.3221	24	11.3221	37	11.3221	27	11.3221	29	11.3221	22	11.3221	28	11.3221	17	11.3221	26
11.3415	18	11.3415	36	11.3415	16	11.3415	19	11.3415	19	11.3415	15	11.3415	15	11.3415	27	11.3415	24	11.3415	21	11.3415	29	11.3415	16	11.3415	39	11.3415	21	11.3415	24
11.361	17	11.361	21	11.361	30	11.361	33	11.361	15	11.361	23	11.361	34	11.361	21	11.361	23	11.361	22	11.361	23	11.361	14	11.361	33	11.361	20	11.361	29
11.3805	30	11.3805	23	11.3805	26	11.3805	27	11.3805	16	11.3805	20	11.3805	23	11.3805	21	11.3805	28	11.3805	35	11.3805	30	11.3805	16	11.3805	34	11.3805	23	11.3805	17
11.4	20	11.4	24	11.4	19	11.4	30	11.4	13	11.4	23	11.4	18	11.4	21	11.4	21	11.4	36	11.4	28	11.4	19	11.4	32	11.4	25	11.4	31
11.4195	30	11.4195	32	11.4195	16	11.4195	29	11.4195	16	11.4195	17	11.4195	25	11.4195	32	11.4195	29	11.4195	26	11.4195	26	11.4195	20	11.4195	42	11.4195	19	11.4195	34
11.439	21	11.439	28	11.439	26	11.439	18	11.439	26	11.439	26	11.439	22	11.439	20	11.439	30	11.439	27	11.439	29	11.439	9	11.439	31	11.439	27	11.439	30
11.4585	25	11.4585	37	11.4585	32	11.4585	15	11.4585	17	11.4585	26	11.4585	27	11.4585	34	11.4585	24	11.4585	14	11.4585	31	11.4585	16	11.4585	29	11.4585	16	11.4585	24
11.478	23	11.478	26	11.478	11	11.478	26	11.478	21	11.478	21	11.478	21	11.478	23	11.478	27	11.478	27	11.478	17	11.478	21	11.478	37	11.478	25	11.478	17
11.4975	18	11.4975	20	11.4975	27	11.4975	26	11.4975	22	11.4975	20	11.4975	24	11.4975	25	11.4975	25	11.4975	31	11.4975	26	11.4975	19	11.4975	30	11.4975	33	11.4975	34
11.517	29	11.517	25	11.517	15	11.517	25	11.517	25	11.517	17	11.517	29	11.517	26	11.517	38	11.517	36	11.517	29	11.517	19	11.517	33	11.517	24	11.517	37
11.5364	34	11.5364	29	11.5364	23	11.5364	23	11.5364	17	11.5364	24	11.5364	25	11.5364	19	11.5364	29	11.5364	18	11.5364	24	11.5364	25	11.5364	39	11.5364	29	11.5364	21
11.5559	19	11.5559	19	11.5559	22	11.5559	25	11.5559	22	11.5559	24	11.5559	26	11.5559	22	11.5559	36	11.5559	30	11.5559	31	11.5559	12	11.5559	32	11.5559	22	11.5559	38
11.5754	18	11.5754	23	11.5754	25	11.5754	29	11.5754	17	11.5754	31	11.5754	21	11.5754	25	11.5754	39	11.5754	24	11.5754	18	11.5754	19	11.5754	30	11.5754	24	11.5754	23
11.5949	18	11.5949	29	11.5949	23	11.5949	22	11.5949	22	11.5949	19	11.5949	25	11.5949	19	11.5949	28	11.5949	24	11.5949	23	11.5949	8	11.5949	34	11.5949	18	11.5949	19
11.6144	23	11.6144	27	11.6144	29	11.6144	30	11.6144	20	11.6144	21	11.6144	20	11.6144	23	11.6144	30	11.6144	20	11.6144	17	11.6144	13	11.6144	36	11.6144	27	11.6144	36
11.6339	15	11.6339	25	11.6339	29	11.6339	31	11.6339	22	11.6339	23	11.6339	12	11.6339	22	11.6339	32	11.6339	26	11.6339	28	11.6339	17	11.6339	23	11.6339	20	11.6339	31
11.6534	23	11.6534	30	11.6534	21	11.6534	29	11.6534	26	11.6534	12	11.6534	25	11.6534	20	11.6534	22	11.6534	24	11.6534	22	11.6534	17	11.6534	38	11.6534	25	11.6534	21
11.6729	19	11.6729	26	11.6729	26	11.6729	30	11.6729	21	11.6729	12	11.6729	29	11.6729	26	11.6729	35	11.6729	27	11.6729	25	11.6729	17	11.6729	26	11.6729	26	11.6729	31
11.6924	20	11.6924	25	11.6924	29	11.6924	35	11.6924	26	11.6924	13	11.6924	23	11.6924	27	11.6924	28	11.6924	28	11.6924	23	11.6924	15	11.6924	32	11.6924	18	11.6924	29
11.7119	16	11.7119	19	11.7119	28	11.7119	17	11.7119	24	11.7119	19	11.7119	30	11.7119	22	11.7119	29	11.7119	33	11.7119	26	11.7119	23	11.7119	28	11.7119	32	11.7119	22
11.7313	14	11.7313	28	11.7313	23	11.7313	25	11.7313	24	11.7313	27	11.7313	22	11.7313	22	11.7313	24	11.7313	33	11.7313	27	11.7313	22	11.7313	30	11.7313	21	11.7313	26
11.7508	26	11.7508	34	11.7508	15	11.7508	27	11.7508	20	11.7508	20	11.7508	17	11.7508	22	11.7508	31	11.7508	26	11.7508	26	11.7508	21	11.7508	36	11.7508	22	11.7508	30
11.7703	23	11.7703	28	11.7703	28	11.7703	25	11.7703	20	11.7703	21	11.7703	26	11.7703	22	11.7703	24	11.7703	34	11.7703	26	11.7703	21	11.7703	25	11.7703	19	11.7703	25
11.7898	23	11.7898	31	11.7898	22	11.7898	25	11.7898	23	11.7898	22	11.7898	17	11.7898	24	11.7898	17	11.7898	33	11.7898	26	11.7898	24	11.7898	38	11.7898	25	11.7898	28
11.8093	19	11.8093	28	11.8093	19	11.8093	28	11.8093	21	11.8093	18	11.8093	16	11.8093	24	11.8093	32	11.8093	31	11.8093	32	11.8093	16	11.8093	28	11.8093	24	11.8093	24
11.8288	21	11.8288	31	11.8288	21	11.8288	36	11.8288	19	11.8288	21	11.8288	25	11.8288	17	11.8288	26	11.8288	28	11.8288	27	11.8288	19	11.8288	38	11.8288	33	11.8288	30
11.8483	19	11.8483	27	11.8483	21	11.8483	29	11.8483	20	11.8483	20	11.8483	20	11.8483	23	11.8483	20	11.8483	33	11.8483	31	11.8483	23	11.8483	35	11.8483	23	11.8483	38
11.8678	23	11.8678	21	11.8678	19	11.8678	22	11.8678	18	11.8678	19	11.8678	28	11.8678	28	11.8678	34	11.8678	22	11.8678	24	11.8678	23	11.8678	41	11.8678	19	11.8678	25
11.8872	14	11.8872	34	11.8872	23	11.8872	30	11.8872	20	11.8872	15	11.8872	18	11.8872	25	11.8872	23	11.8872	27	11.8872	24	11.8872	21	11.8872	33	11.8872	21	11.8872	29
11.9067	20	11.9067	24	11.9067	25	11.9067	23	11.9067	11	11.9067	16	11.9067	15	11.9067	25	11.9067	28	11.9067	26	11.9067	23	11.9067	28	11.9067	36	11.9067	25	11.9067	24
11.9262	19	11.9262	32	11.9262	22	11.9262	34	11.9262	22	11.9262	19	11.9262	33	11.9262	27	11.9262	31	11.9262	30	11.9262	23	11.9262	13	11.9262	38	11.9262	22	11.9262	20
11.9457	26	11.9457	23	11.9457	19	11.9457	26	11.9457	24	11.9457	18	11.9457	14	11.9457	24	11.9457	23	11.9457	26	11.9457	29	11.9457	21	11.9457	34	11.9457	17	11.9457	23
11.9652	16	11.9652	31	11.9652	10	11.9652	26	11.9652	16	11.9652	27	11.9652	15	11.9652	29	11.9652	30	11.9652	31	11.9652	36	11.9652	18	11.9652	33	11.9652	20	11.9652	29
11.9847	18	11.9847	25	11.9847	25	11.9847	21	11.9847	29	11.9847	18	11.9847	20	11.9847	32	11.9847	25	11.9847	33	11.9847	25	11.9847	20	11.9847	40	11.9847	18	11.9847	31
12.0042	15	12.0042	22	12.0042	23	12.0042	24	12.0042	24	12.0042	16	12.0042	20	12.0042	21	12.0042	33	12.0042	33	12.0042	32	12.0042	17	12.0042	39	12.0042	19	12.0042	27
12.0237	22	12.0237	21	12.0237	22	12.0237	25	12.0237	24	12.0237	24	12.0237	22	12.0237	28	12.0237	23	12.0237	29	12.0237	22	12.0237	15	12.0237	24	12.0237	27	12.0237	27
12.0432	13	12.0432	25	12.0432	14	12.0432	23	12.0432	20	12.0432	17	12.0432	21	12.0432	24	12.0432	34	12.0432	28	12.0432	21	12.0432	22	12.0432	28	12.0432	26	12.0432	27
12.0627	17	12.0627	33	12.0627	12	12.0627	27	12.0627	15	12.0627	20	12.0627	11	12.0627	27	12.0627	28	12.0627	28	12.0627	32	12.0627	15	12.0627	36	12.0627	25	12.0627	27
12.0822	17	12.0822	28	12.0822	30	12.0822	23	12.0822	21	12.0822	18	12.0822	35	12.0822	23	12.0822	31	12.0822	38	12.0822	24	12.0822	24	12.0822	23	12.0822	19	12.0822	24
12.1016	21	12.1016	30	12.1016	22	12.1016	28	12.1016	20	12.1016	24	12.1016	21	12.1016	28	12.1016	33	12.1016	35	12.1016	27	12.1016	22	12.1016	33	12.1016	20	12.1016	20
12.1211	18	12.1211	23	12.1211	13	12.1211	15	12.1211	18	12.1211	29	12.1211	25	12.1211	31	12.1211	36	12.1211	24	12.1211	26	12.1211	21	12.1211	24	12.1211	21	12.1211	26
12.1406	15	12.1406	30	12.1406	18	12.1406	30	12.1406	19	12.1406	22	12.1406	31	12.1406	26	12.1406	29	12.1406	31	12.1406	23	12.1406	19	12.1406	29	12.1406	18	12.1406	19
12.1601	15	12.1601	31	12.1601	20	12.1601	31	12.1601	16	12.1601	24	12.1601	26	12.1601	23	12.1601	23	12.1601	30	12.1601	18	12.1601	12	12.1601	22	12.1601	19	12.1601	21
12.1796	21	12.1796	22	12.1796	20	12.1796	29	12.1796	16	12.1796	15	12.1796	24	12.1796	32	12.1796	25	12.1796	36	12.1796	17	12.1796	13	12.1796	27	12.1796	14	12.1796	34
12.1991	21	12.1991	26	12.1991	18	12.1991	30	12.1991	16	12.1991	17	12.1991	16	12.1991	23	12.1991	32	12.1991	19	12.1991	26	12.1991	18	12.1991	29	12.1991	24	12.1991	20
12.2186	14	12.2186	27	12.2186	21	12.2186	26	12.2186	19	12.2186	18	12.2186	22	12.2186	24	12.2186	22	12.2186	32	12.2186	22	12.2186	16	12.2186	25	12.2186	23	12.2186	24
12.2381	13	12.2381	32	12.2381	17	12.2381	25	12.2381	16	12.2381	26	12.2381	23	12.2381	26	12.2381	26	12.2381	30	12.2381	28	12.2381	25	12.2381	30	12.2381	26	12.2381	50
12.2576	17	12.2576	25	12.2576	22	12.2576	24	12.2576	23	12.2576	23	12.2576	26	12.2576	17	12.2576	29	12.2576	32	12.2576	26	12.2576	16	12.2576	35	12.2576	21	12.2576	21
12.277	17	12.277	19	12.277	30	12.277	22	12.277	23	12.277	29	12.277	20	12.277	24	12.277	30	12.277	40	12.277	16	12.277	13	12.277	23	12.277	24	12.277	30
12.2965	16	12.2965	27	12.2965	23	12.2965	20	12.2965	18	12.2965	18	12.2965	25	12.2965	20	12.2965	24	12.2965	18	12.2965	25	12.2965	19	12.2965	27	12.2965	18	12.2965	27
12.316	18	12.316	27	12.316	23	12.316	23	12.316	20	12.316	20	12.316	24	12.316	16	12.316	26	12.316	28	12.316	33	12.316	18	12.316	31	12.316	16	12.316	26
12.3355	20	12.3355	30	12.3355	18	12.3355	29	12.3355	27	12.3355	15	12.3355	23	12.3355	26	12.3355	22	12.3355	32	12.3355	22	12.3355	18	12.3355	20	12.3355	20	12.3355	27
12.355	16	12.355	28	12.355	17	12.355	24	12.355	20	12.355	18	12.355	18	12.355	33	12.355	26	12.355	21	12.355	26	12.355	20	12.355	39	12.355	22	12.355	25
12.3745	23	12.3745	23	12.3745	16	12.3745	29	12.3745	15	12.3745	16	12.3745	31	12.3745	20	12.3745	25	12.3745	21	12.3745	25	12.3745	15	12.3745	25	12.3745	21	12.3745	28
12.394	15	12.394	26	12.394	19	12.394	16	12.394	19	12.394	12	12.394	20	12.394	29	12.394	28	12.394	32	12.394	22	12.394	27	12.394	25	12.394	25	12.394	22
12.4135	16	12.4135	34	12.4135	22	12.4135	13	12.4135	21	12.4135	18	12.4135	20	12.4135	19	12.4135	32	12.4135	25	12.4135	16	12.4135	21	12.4135	23	12.4135	21	12.4135	20
12.433	20	12.433	30	12.433	26	12.433	22	12.433	19	12.433	20	12.433	19	12.433	21	12.433	24	12.433	28	12.433	23	12.433	22	12.433	27	12.433	20	12.433	36
12.4525	19	12.4525	33	12.4525	23	12.4525	23	12.4525	32	12.4525	15	12.4525	21	12.4525	21	12.4525	26	12.4525	27	12.4525	25	12.4525	20	12.4525	27	12.4525	18	12.4525	30
12.4719	24	12.4719	21	12.4719	19	12.4719	18	12.4719	26	12.4719	14	12.4719	12	12.4719	25	12.4719	23	12.4719	29	12.4719	30	12.4719	18	12.4719	28	12.4719	17	12.4719	17
12.4914	16	12.4914	26	12.4914	18	12.4914	27	12.4914	19	12.4914	20	12.4914	29	12.4914	31	12.4914	21	12.4914	36	12.4914	24	12.4914	22	12.4914	23	12.4914	21	12.4914	24
12.5109	16	12.5109	22	12.5109	22	12.5109	22	12.5109	21	12.5109	20	12.5109	20	12.5109	29	12.5109	24	12.5109	30	12.5109	18	12.5109	22	12.5109	33	12.5109	33	12.5109	24
12.5304	17	12.5304	28	12.5304	18	12.5304	27	12.5304	22	12.5304	11	12.5304	25	12.5304	25	12.5304	30	12.5304	25	12.5304	20	12.5304	15	12.5304	32	12.5304	19	12.5304	21
12.5499	18	12.5499	30	12.5499	17	12.5499	31	12.5499	22	12.5499	23	12.5499	21	12.5499	18	12.5499	19	12.5499	25	12.5499	25	12.5499	14	12.5499	23	12.5499	22	12.5499	26
12.5694	15	12.5694	30	12.5694	24	12.5694	22	12.5694	17	12.5694	18	12.5694	18	12.5694	24	12.5694	32	12.5694	32	12.5694	20	12.5694	16	12.5694	23	12.5694	21	12.5694	23
12.5889	11	12.5889	33	12.5889	23	12.5889	38	12.5889	17	12.5889	22	12.5889	21	12.5889	29	12.5889	39	12.5889	25	12.5889	20	12.5889	22	12.5889	29	12.5889	20	12.5889	25
12.6084	17	12.6084	27	12.6084	17	12.6084	26	12.6084	18	12.6084	22	12.6084	24	12.6084	36	12.6084	30	12.6084	22	12.6084	19	12.6084	19	12.6084	23	12.6084	21	12.6084	29
12.6279	16	12.6279	27	12.6279	16	12.6279	32	12.6279	12	12.6279	18	12.6279	23	12.6279	41	12.6279	39	12.6279	21	12.6279	22	12.6279	19	12.6279	36	12.6279	20	12.6279	28
12.6473	18	12.6473	25	12.6473	16	12.6473	23	12.6473	18	12.6473	27	12.6473	21	12.6473	26	12.6473	23	12.6473	37	12.6473	24	12.6473	14	12.6473	29	12.6473	19	12.6473	27
12.6668	12	12.6668	36	12.6668	25	12.6668	19	12.6668	28	12.6668	16	12.6668	24	12.6668	25	12.6668	37	12.6668	37	12.6668	20	12.6668	16	12.6668	35	12.6668	18	12.6668	22
12.6863	15	12.6863	36	12.6863	30	12.6863	20	12.6863	20	12.6863	17	12.6863	29	12.6863	33	12.6863	30	12.6863	29	12.6863	24	12.6863	16	12.6863	32	12.6863	29	12.6863	31
12.7058	25	12.7058	22	12.7058	22	12.7058	32	12.7058	23	12.7058	17	12.7058	23	12.7058	24	12.7058	22	12.7058	24	12.7058	27	12.7058	21	12.7058	28	12.7058	22	12.7058	37
12.7253	16	12.7253	32	12.7253	19	12.7253	16	12.7253	25	12.7253	22	12.7253	26	12.7253	22	12.7253	28	12.7253	30	12.7253	19	12.7253	12	12.7253	33	12.7253	20	12.7253	22
12.7448	15	12.7448	24	12.7448	21	12.7448	31	12.7448	19	12.7448	16	12.7448	32	12.7448	24	12.7448	28	12.7448	23	12.7448	27	12.7448	18	12.7448	17	12.7448	23	12.7448	24
12.7643	13	12.7643	39	12.7643	22	12.7643	20	12.7643	18	12.7643	22	12.7643	20	12.7643	20	12.7643	23	12.7643	33	12.7643	25	12.7643	22	12.7643	29	12.7643	24	12.7643	20
12.7838	26	12.7838	29	12.7838	18	12.7838	20	12.7838	18	12.7838	17	12.7838	29	12.7838	36	12.7838	32	12.7838	32	12.7838	25	12.7838	13	12.7838	27	12.7838	20	12.7838	28
12.8033	17	12.8033	21	12.8033	27	12.8033	28	12.8033	18	12.8033	24	12.8033	25	12.8033	26	12.8033	34	12.8033	23	12.8033	23	12.8033	10	12.8033	30	12.8033	23	12.8033	22
12.8227	25	12.8227	36	12.8227	20	12.8227	20	12.8227	27	12.8227	18	12.8227	21	12.8227	18	12.8227	25	12.8227	31	12.8227	20	12.8227	16	12.8227	24	12.8227	28	12.8227	29
12.8422	8	12.8422	32	12.8422	19	12.8422	20	12.8422	22	12.8422	25	12.8422	17	12.8422	25	12.8422	24	12.8422	28	12.8422	30	12.8422	17	12.8422	31	12.8422	28	12.8422	23
12.8617	18	12.8617	27	12.8617	26	12.8617	16	12.8617	21	12.8617	16	12.8617	26	12.8617	27	12.8617	24	12.8617	38	12.8617	30	12.8617	17	12.8617	20	12.8617	16	12.8617	24
12.8812	21	12.8812	33	12.8812	27	12.8812	21	12.8812	22	12.8812	22	12.8812	19	12.8812	20	12.8812	21	12.8812	41	12.8812	25	12.8812	18	12.8812	25	12.8812	19	12.8812	22
12.9007	22	12.9007	34	12.9007	32	12.9007	30	12.9007	31	12.9007	21	12.9007	17	12.9007	31	12.9007	37	12.9007	25	12.9007	29	12.9007	17	12.9007	28	12.9007	27	12.9007	22
12.9202	18	12.9202	25	12.9202	26	12.9202	24	12.9202	14	12.9202	21	12.9202	20	12.9202	21	12.9202	28	12.9202	31	12.9202	23	12.9202	9	12.9202	22	12.9202	25	12.9202	24
12.9397	25	12.9397	24	12.9397	31	12.9397	26	12.9397	22	12.9397	13	12.9397	24	12.9397	16	12.9397	35	12.9397	26	12.9397	26	12.9397	15	12.9397	19	12.9397	22	12.9397	20
12.9592	18	12.9592	34	12.9592	15	12.9592	28	12.9592	24	12.9592	18	12.9592	21	12.9592	13	12.9592	25	12.9592	30	12.9592	22	12.9592	9	12.9592	28	12.9592	15	12.9592	35
12.9787	13	12.9787	20	12.9787	26	12.9787	28	12.9787	18	12.9787	30	12.9787	26	12.9787	11	12.9787	26	12.9787	28	12.9787	23	12.9787	11	12.9787	21	12.9787	31	12.9787	23
12.9982	20	12.9982	31	12.9982	20	12.9982	23	12.9982	23	12.9982	23	12.9982	19	12.9982	30	12.9982	29	12.9982	39	12.9982	21	12.9982	26	12.9982	26	12.9982	21	12.9982	24
13.0176	11	13.0176	25	13.0176	22	13.0176	36	13.0176	19	13.0176	27	13.0176	31	13.0176	22	13.0176	34	13.0176	26	13.0176	26	13.0176	13	13.0176	20	13.0176	17	13.0176	23
13.0371	22	13.0371	21	13.0371	18	13.0371	35	13.0371	26	13.0371	27	13.0371	22	13.0371	26	13.0371	28	13.0371	29	13.0371	31	13.0371	16	13.0371	22	13.0371	30	13.0371	24
13.0566	17	13.0566	31	13.0566	21	13.0566	19	13.0566	22	13.0566	22	13.0566	31	13.0566	31	13.0566	26	13.0566	31	13.0566	31	13.0566	25	13.0566	25	13.0566	24	13.0566	23
13.0761	20	13.0761	39	13.0761	28	13.0761	17	13.0761	14	13.0761	24	13.0761	32	13.0761	26	13.0761	27	13.0761	26	13.0761	27	13.0761	20	13.0761	24	13.0761	15	13.0761	25
13.0956	19	13.0956	31	13.0956	13	13.0956	32	13.0956	16	13.0956	22	13.0956	17	13.0956	26	13.0956	26	13.0956	25	13.0956	21	13.0956	19	13.0956	20	13.0956	27	13.0956	19
13.1151	23	13.1151	33	13.1151	13	13.1151	28	13.1151	31	13.1151	17	13.1151	27	13.1151	25	13.1151	29	13.1151	30	13.1151	28	13.1151	17	13.1151	30	13.1151	19	13.1151	29
13.1346	20	13.1346	31	13.1346	12	13.1346	23	13.1346	27	13.1346	26	13.1346	21	13.1346	28	13.1346	34	13.1346	29	13.1346	33	13.1346	20	13.1346	29	13.1346	14	13.1346	20
13.1541	23	13.1541	24	13.1541	16	13.1541	22	13.1541	15	13.1541	15	13.1541	27	13.1541	28	13.1541	23	13.1541	31	13.1541	28	13.1541	23	13.1541	23	13.1541	18	13.1541	30
13.1736	19	13.1736	32	13.1736	23	13.1736	21	13.1736	21	13.1736	17	13.1736	23	13.1736	28	13.1736	22	13.1736	39	13.1736	28	13.1736	22	13.1736	32	13.1736	15	13.1736	23
13.193	20	13.193	15	13.193	25	13.193	28	13.193	19	13.193	19	13.193	19	13.193	34	13.193	24	13.193	36	13.193	36	13.193	22	13.193	24	13.193	17	13.193	24
13.2125	18	13.2125	32	13.2125	22	13.2125	26	13.2125	14	13.2125	27	13.2125	23	13.2125	38	13.2125	30	13.2125	33	13.2125	27	13.2125	18	13.2125	24	13.2125	34	13.2125	31
13.232	23	13.232	28	13.232	27	13.232	23	13.232	18	13.232	24	13.232	20	13.232	21	13.232	31	13.232	27	13.232	26	13.232	14	13.232	28	13.232	23	13.232	30
13.2515	22	13.2515	27	13.2515	26	13.2515	22	13.2515	21	13.2515	18	13.2515	23	13.2515	23	13.2515	28	13.2515	33	13.2515	25	13.2515	10	13.2515	26	13.2515	27	13.2515	31
13.271	25	13.271	28	13.271	26	13.271	27	13.271	24	13.271	12	13.271	29	13.271	31	13.271	32	13.271	40	13.271	27	13.271	14	13.271	31	13.271	22	13.271	25
13.2905	18	13.2905	24	13.2905	34	13.2905	26	13.2905	15	13.2905	17	13.2905	25	13.2905	27	13.2905	26	13.2905	39	13.2905	25	13.2905	20	13.2905	20	13.2905	29	13.2905	25
13.31	22	13.31	20	13.31	19	13.31	18	13.31	18	13.31	22	13.31	18	13.31	31	13.31	27	13.31	38	13.31	14	13.31	24	13.31	33	13.31	19	13.31	25
13.3295	16	13.3295	15	13.3295	19	13.3295	27	13.3295	20	13.3295	12	13.3295	22	13.3295	28	13.3295	29	13.3295	28	13.3295	25	13.3295	17	13.3295	25	13.3295	22	13.3295	31
13.349	18	13.349	30	13.349	20	13.349	24	13.349	20	13.349	23	13.349	29	13.349	26	13.349	22	13.349	22	13.349	19	13.349	25	13.349	33	13.349	18	13.349	12
13.3684	13	13.3684	31	13.3684	24	13.3684	29	13.3684	19	13.3684	17	13.3684	15	13.3684	21	13.3684	38	13.3684	30	13.3684	14	13.3684	22	13.3684	31	13.3684	20	13.3684	27
13.3879	16	13.3879	33	13.3879	25	13.3879	27	13.3879	13	13.3879	18	13.3879	18	13.3879	24	13.3879	25	13.3879	36	13.3879	24	13.3879	19	13.3879	24	13.3879	21	13.3879	23
13.4074	21	13.4074	35	13.4074	20	13.4074	15	13.4074	17	13.4074	12	13.4074	28	13.4074	23	13.4074	27	13.4074	35	13.4074	19	13.4074	20	13.4074	27	13.4074	24	13.4074	27
13.4269	26	13.4269	22	13.4269	24	13.4269	24	13.4269	20	13.4269	15	13.4269	17	13.4269	16	13.4269	26	13.4269	35	13.4269	33	13.4269	16	13.4269	27	13.4269	19	13.4269	19
13.4464	21	13.4464	32	13.4464	20	13.4464	21	13.4464	22	13.4464	10	13.4464	28	13.4464	27	13.4464	24	13.4464	35	13.4464	34	13.4464	19	13.4464	26	13.4464	24	13.4464	21
13.4659	12	13.4659	38	13.4659	27	13.4659	21	13.4659	16	13.4659	22	13.4659	20	13.4659	27	13.4659	26	13.4659	38	13.4659	31	13.4659	20	13.4659	34	13.4659	32	13.4659	23
13.4854	23	13.4854	27	13.4854	21	13.4854	28	13.4854	28	13.4854	21	13.4854	30	13.4854	24	13.4854	29	13.4854	33	13.4854	21	13.4854	11	13.4854	21	13.4854	25	13.4854	29
13.5049	19	13.5049	35	13.5049	19	13.5049	44	13.5049	18	13.5049	18	13.5049	14	13.5049	23	13.5049	30	13.5049	20	13.5049	28	13.5049	14	13.5049	20	13.5049	29	13.5049	22
13.5244	14	13.5244	27	13.5244	21	13.5244	31	13.5244	20	13.5244	22	13.5244	30	13.5244	35	13.5244	22	13.5244	33	13.5244	29	13.5244	20	13.5244	19	13.5244	22	13.5244	24
13.5439	13	13.5439	36	13.5439	27	13.5439	19	13.5439	17	13.5439	8	13.5439	18	13.5439	23	13.5439	20	13.5439	34	13.5439	32	13.5439	13	13.5439	27	13.5439	24	13.5439	32
13.5633	16	13.5633	26	13.5633	24	13.5633	24	13.5633	21	13.5633	19	13.5633	23	13.5633	28	13.5633	28	13.5633	40	13.5633	24	13.5633	18	13.5633	33	13.5633	23	13.5633	25
13.5828	24	13.5828	27	13.5828	17	13.5828	18	13.5828	28	13.5828	19	13.5828	23	13.5828	24	13.5828	31	13.5828	28	13.5828	22	13.5828	10	13.5828	33	13.5828	21	13.5828	24
13.6023	18	13.6023	33	13.6023	23	13.6023	24	13.6023	17	13.6023	22	13.6023	27	13.6023	28	13.6023	28	13.6023	24	13.6023	27	13.6023	25	13.6023	18	13.6023	28	13.6023	29
13.6218	21	13.6218	26	13.6218	23	13.6218	25	13.6218	18	13.6218	25	13.6218	27	13.6218	31	13.6218	24	13.6218	35	13.6218	24	13.6218	19	13.6218	19	13.6218	25	13.6218	25
13.6413	21	13.6413	45	13.6413	19	13.6413	26	13.6413	17	13.6413	22	13.6413	22	13.6413	37	13.6413	36	13.6413	30	13.6413	20	13.6413	20	13.6413	25	13.6413	21	13.6413	21
13.6608	22	13.6608	19	13.6608	22	13.6608	26	13.6608	16	13.6608	14	13.6608	25	13.6608	38	13.6608	34	13.6608	39	13.6608	27	13.6608	18	13.6608	26	13.6608	29	13.6608	24
13.6803	29	13.6803	27	13.6803	22	13.6803	33	13.6803	19	13.6803	15	13.6803	26	13.6803	31	13.6803	46	13.6803	29	13.6803	29	13.6803	12	13.6803	26	13.6803	23	13.6803	24
13.6998	14	13.6998	30	13.6998	10	13.6998	23	13.6998	19	13.6998	19	13.6998	15	13.6998	29	13.6998	35	13.6998	25	13.6998	30	13.6998	18	13.6998	27	13.6998	23	13.6998	27
13.7193	16	13.7193	37	13.7193	16	13.7193	23	13.7193	22	13.7193	19	13.7193	22	13.7193	27	13.7193	17	13.7193	31	13.7193	17	13.7193	18	13.7193	31	13.7193	22	13.7193	23
13.7387	17	13.7387	34	13.7387	27	13.7387	21	13.7387	29	13.7387	10	13.7387	15	13.7387	28	13.7387	27	13.7387	33	13.7387	36	13.7387	20	13.7387	29	13.7387	23	13.7387	21
13.7582	21	13.7582	34	13.7582	18	13.7582	22	13.7582	31	13.7582	22	13.7582	15	13.7582	33	13.7582	27	13.7582	30	13.7582	27	13.7582	21	13.7582	30	13.7582	20	13.7582	26
13.7777	18	13.7777	21	13.7777	20	13.7777	24	13.7777	26	13.7777	31	13.7777	12	13.7777	31	13.7777	45	13.7777	30	13.7777	27	13.7777	17	13.7777	41	13.7777	24	13.7777	17
13.7972	13	13.7972	41	13.7972	26	13.7972	22	13.7972	15	13.7972	19	13.7972	32	13.7972	31	13.7972	27	13.7972	38	13.7972	29	13.7972	21	13.7972	27	13.7972	23	13.7972	20
13.8167	20	13.8167	27	13.8167	22	13.8167	33	13.8167	20	13.8167	24	13.8167	26	13.8167	32	13.8167	21	13.8167	30	13.8167	24	13.8167	19	13.8167	30	13.8167	21	13.8167	20
13.8362	18	13.8362	21	13.8362	31	13.8362	20	13.8362	22	13.8362	19	13.8362	24	13.8362	37	13.8362	35	13.8362	25	13.8362	18	13.8362	14	13.8362	29	13.8362	14	13.8362	19
13.8557	25	13.8557	39	13.8557	25	13.8557	33	13.8557	24	13.8557	17	13.8557	22	13.8557	25	13.8557	25	13.8557	36	13.8557	27	13.8557	19	13.8557	26	13.8557	27	13.8557	30
13.8752	17	13.8752	14	13.8752	26	13.8752	26	13.8752	18	13.8752	22	13.8752	28	13.8752	34	13.8752	33	13.8752	32	13.8752	28	13.8752	15	13.8752	33	13.8752	20	13.8752	43
13.8947	25	13.8947	30	13.8947	15	13.8947	33	13.8947	31	13.8947	30	13.8947	20	13.8947	33	13.8947	33	13.8947	33	13.8947	22	13.8947	17	13.8947	27	13.8947	18	13.8947	25
13.9141	16	13.9141	28	13.9141	25	13.9141	28	13.9141	20	13.9141	17	13.9141	21	13.9141	30	13.9141	34	13.9141	31	13.9141	26	13.9141	21	13.9141	32	13.9141	16	13.9141	30
13.9336	20	13.9336	25	13.9336	25	13.9336	29	13.9336	26	13.9336	29	13.9336	28	13.9336	29	13.9336	28	13.9336	32	13.9336	32	13.9336	12	13.9336	34	13.9336	34	13.9336	32
13.9531	18	13.9531	29	13.9531	27	13.9531	31	13.9531	21	13.9531	14	13.9531	18	13.9531	28	13.9531	34	13.9531	39	13.9531	24	13.9531	12	13.9531	36	13.9531	20	13.9531	23
13.9726	18	13.9726	19	13.9726	28	13.9726	31	13.9726	19	13.9726	27	13.9726	23	13.9726	21	13.9726	34	13.9726	21	13.9726	28	13.9726	19	13.9726	29	13.9726	28	13.9726	28
13.9921	26	13.9921	26	13.9921	22	13.9921	34	13.9921	21	13.9921	13	13.9921	26	13.9921	34	13.9921	31	13.9921	32	13.9921	27	13.9921	19	13.9921	24	13.9921	28	13.9921	25
14.0116	25	14.0116	34	14.0116	21	14.0116	27	14.0116	27	14.0116	24	14.0116	20	14.0116	33	14.0116	32	14.0116	31	14.0116	29	14.0116	17	14.0116	27	14.0116	24	14.0116	20
14.0311	19	14.0311	31	14.0311	23	14.0311	18	14.0311	23	14.0311	16	14.0311	22	14.0311	41	14.0311	37	14.0311	32	14.0311	24	14.0311	16	14.0311	26	14.0311	27	14.0311	29
14.0506	24	14.0506	31	14.0506	26	14.0506	31	14.0506	28	14.0506	24	14.0506	32	14.0506	26	14.0506	24	14.0506	49	14.0506	34	14.0506	28	14.0506	34	14.0506	14	14.0506	24
14.0701	15	14.0701	24	14.0701	26	14.0701	33	14.0701	19	14.0701	19	14.0701	23	14.0701	36	14.0701	39	14.0701	26	14.0701	25	14.0701	16	14.0701	26	14.0701	27	14.0701	30
14.0895	20	14.0895	43	14.0895	35	14.0895	43	14.0895	19	14.0895	21	14.0895	22	14.0895	43	14.0895	27	14.0895	43	14.0895	24	14.0895	20	14.0895	22	14.0895	23	14.0895	25
14.109	15	14.109	34	14.109	18	14.109	33	14.109	27	14.109	16	14.109	22	14.109	33	14.109	30	14.109	41	14.109	25	14.109	13	14.109	36	14.109	30	14.109	27
14.1285	21	14.1285	34	14.1285	24	14.1285	26	14.1285	25	14.1285	26	14.1285	26	14.1285	43	14.1285	35	14.1285	25	14.1285	29	14.1285	25	14.1285	33	14.1285	24	14.1285	23
14.148	16	14.148	28	14.148	15	14.148	27	14.148	19	14.148	21	14.148	27	14.148	27	14.148	30	14.148	27	14.148	30	14.148	14	14.148	29	14.148	21	14.148	29
14.1675	27	14.1675	38	14.1675	22	14.1675	30	14.1675	18	14.1675	26	14.1675	27	14.1675	24	14.1675	24	14.1675	35	14.1675	27	14.1675	15	14.1675	28	14.1675	15	14.1675	24
14.187	16	14.187	34	14.187	26	14.187	27	14.187	21	14.187	21	14.187	20	14.187	40	14.187	23	14.187	34	14.187	35	14.187	15	14.187	29	14.187	22	14.187	19
14.2065	19	14.2065	36	14.2065	27	14.2065	30	14.2065	20	14.2065	23	14.2065	21	14.2065	22	14.2065	27	14.2065	31	14.2065	29	14.2065	12	14.2065	34	14.2065	18	14.2065	25
14.226	23	14.226	31	14.226	27	14.226	24	14.226	28	14.226	17	14.226	20	14.226	27	14.226	38	14.226	25	14.226	29	14.226	19	14.226	24	14.226	22	14.226	30
14.2455	17	14.2455	35	14.2455	17	14.2455	18	14.2455	10	14.2455	19	14.2455	21	14.2455	30	14.2455	25	14.2455	32	14.2455	27	14.2455	24	14.2455	25	14.2455	23	14.2455	21
14.265	24	14.265	20	14.265	21	14.265	32	14.265	22	14.265	20	14.265	32	14.265	26	14.265	34	14.265	24	14.265	33	14.265	26	14.265	15	14.265	31	14.265	30
14.2844	19	14.2844	25	14.2844	34	14.2844	31	14.2844	13	14.2844	26	14.2844	30	14.2844	26	14.2844	22	14.2844	25	14.2844	28	14.2844	17	14.2844	19	14.2844	23	14.2844	25
14.3039	13	14.3039	37	14.3039	29	14.3039	20	14.3039	17	14.3039	20	14.3039	16	14.3039	29	14.3039	30	14.3039	37	14.3039	32	14.3039	18	14.3039	24	14.3039	21	14.3039	31
14.3234	12	14.3234	37	14.3234	21	14.3234	25	14.3234	21	14.3234	20	14.3234	25	14.3234	38	14.3234	28	14.3234	29	14.3234	29	14.3234	10	14.3234	25	14.3234	24	14.3234	19
14.3429	31	14.3429	37	14.3429	33	14.3429	24	14.3429	25	14.3429	28	14.3429	27	14.3429	26	14.3429	26	14.3429	25	14.3429	21	14.3429	24	14.3429	21	14.3429	23	14.3429	24
14.3624	21	14.3624	28	14.3624	24	14.3624	27	14.3624	20	14.3624	24	14.3624	28	14.3624	26	14.3624	27	14.3624	29	14.3624	23	14.3624	16	14.3624	34	14.3624	25	14.3624	29
14.3819	17	14.3819	26	14.3819	25	14.3819	23	14.3819	23	14.3819	24	14.3819	18	14.3819	25	14.3819	38	14.3819	30	14.3819	23	14.3819	19	14.3819	28	14.3819	27	14.3819	17
14.4014	14	14.4014	27	14.4014	21	14.4014	27	14.4014	22	14.4014	19	14.4014	22	14.4014	21	14.4014	29	14.4014	36	14.4014	28	14.4014	17	14.4014	26	14.4014	22	14.4014	22
14.4209	32	14.4209	39	14.4209	24	14.4209	29	14.4209	17	14.4209	19	14.4209	16	14.4209	31	14.4209	21	14.4209	34	14.4209	32	14.4209	21	14.4209	40	14.4209	28	14.4209	23
14.4404	14	14.4404	28	14.4404	30	14.4404	26	14.4404	22	14.4404	28	14.4404	22	14.4404	36	14.4404	37	14.4404	20	14.4404	31	14.4404	21	14.4404	24	14.4404	18	14.4404	30
14.4598	26	14.4598	30	14.4598	23	14.4598	22	14.4598	24	14.4598	18	14.4598	20	14.4598	25	14.4598	28	14.4598	28	14.4598	22	14.4598	19	14.4598	19	14.4598	25	14.4598	30
14.4793	25	14.4793	34	14.4793	28	14.4793	22	14.4793	18	14.4793	20	14.4793	27	14.4793	31	14.4793	30	14.4793	35	14.4793	28	14.4793	16	14.4793	22	14.4793	23	14.4793	25
14.4988	19	14.4988	26	14.4988	26	14.4988	30	14.4988	21	14.4988	23	14.4988	14	14.4988	29	14.4988	29	14.4988	35	14.4988	33	14.4988	28	14.4988	30	14.4988	31	14.4988	30
14.5183	17	14.5183	26	14.5183	31	14.5183	28	14.5183	21	14.5183	16	14.5183	22	14.5183	22	14.5183	30	14.5183	30	14.5183	32	14.5183	17	14.5183	29	14.5183	25	14.5183	27
14.5378	16	14.5378	27	14.5378	25	14.5378	29	14.5378	24	14.5378	22	14.5378	19	14.5378	24	14.5378	22	14.5378	24	14.5378	24	14.5378	20	14.5378	22	14.5378	26	14.5378	32
14.5573	12	14.5573	39	14.5573	26	14.5573	37	14.5573	24	14.5573	32	14.5573	23	14.5573	30	14.5573	23	14.5573	28	14.5573	25	14.5573	20	14.5573	27	14.5573	21	14.5573	29
14.5768	17	14.5768	33	14.5768	25	14.5768	30	14.5768	17	14.5768	17	14.5768	15	14.5768	28	14.5768	25	14.5768	32	14.5768	22	14.5768	19	14.5768	25	14.5768	26	14.5768	27
14.5963	14	14.5963	36	14.5963	20	14.5963	28	14.5963	15	14.5963	17	14.5963	23	14.5963	22	14.5963	33	14.5963	34	14.5963	35	14.5963	25	14.5963	19	14.5963	22	14.5963	28
14.6158	23	14.6158	29	14.6158	22	14.6158	24	14.6158	18	14.6158	22	14.6158	30	14.6158	37	14.6158	28	14.6158	31	14.6158	18	14.6158	21	14.6158	18	14.6158	25	14.6158	27
14.6353	16	14.6353	26	14.6353	12	14.6353	29	14.6353	24	14.6353	17	14.6353	21	14.6353	42	14.6353	26	14.6353	31	14.6353	31	14.6353	12	14.6353	26	14.6353	28	14.6353	24
14.6547	27	14.6547	22	14.6547	35	14.6547	28	14.6547	22	14.6547	24	14.6547	20	14.6547	29	14.6547	26	14.6547	40	14.6547	24	14.6547	20	14.6547	18	14.6547	19	14.6547	19
14.6742	22	14.6742	35	14.6742	25	14.6742	16	14.6742	24	14.6742	17	14.6742	29	14.6742	29	14.6742	29	14.6742	26	14.6742	25	14.6742	19	14.6742	30	14.6742	25	14.6742	33
14.6937	18	14.6937	29	14.6937	25	14.6937	23	14.6937	23	14.6937	19	14.6937	32	14.6937	32	14.6937	23	14.6937	30	14.6937	35	14.6937	21	14.6937	20	14.6937	25	14.6937	31
14.7132	23	14.7132	26	14.7132	27	14.7132	21	14.7132	22	14.7132	26	14.7132	21	14.7132	29	14.7132	37	14.7132	26	14.7132	30	14.7132	14	14.7132	23	14.7132	25	14.7132	28
14.7327	18	14.7327	34	14.7327	37	14.7327	27	14.7327	23	14.7327	28	14.7327	18	14.7327	33	14.7327	30	14.7327	29	14.7327	43	14.7327	9	14.7327	29	14.7327	27	14.7327	29
14.7522	15	14.7522	29	14.7522	22	14.7522	28	14.7522	17	14.7522	18	14.7522	22	14.7522	21	14.7522	31	14.7522	33	14.7522	28	14.7522	16	14.7522	28	14.7522	28	14.7522	27
14.7717	23	14.7717	29	14.7717	20	14.7717	25	14.7717	11	14.7717	17	14.7717	30	14.7717	29	14.7717	30	14.7717	24	14.7717	31	14.7717	28	14.7717	24	14.7717	24	14.7717	29
14.7912	23	14.7912	36	14.7912	28	14.7912	21	14.7912	21	14.7912	25	14.7912	22	14.7912	31	14.7912	32	14.7912	29	14.7912	27	14.7912	20	14.7912	24	14.7912	17	14.7912	28
14.8107	27	14.8107	25	14.8107	21	14.8107	29	14.8107	26	14.8107	16	14.8107	25	14.8107	23	14.8107	36	14.8107	20	14.8107	21	14.8107	12	14.8107	23	14.8107	24	14.8107	32
14.8301	19	14.8301	16	14.8301	26	14.8301	26	14.8301	18	14.8301	32	14.8301	24	14.8301	36	14.8301	26	14.8301	42	14.8301	30	14.8301	16	14.8301	24	14.8301	27	14.8301	23
14.8496	32	14.8496	27	14.8496	32	14.8496	20	14.8496	18	14.8496	20	14.8496	28	14.8496	30	14.8496	23	14.8496	38	14.8496	31	14.8496	10	14.8496	32	14.8496	23	14.8496	32
14.8691	18	14.8691	24	14.8691	29	14.8691	27	14.8691	26	14.8691	25	14.8691	22	14.8691	32	14.8691	36	14.8691	48	14.8691	25	14.8691	17	14.8691	34	14.8691	25	14.8691	26
14.8886	15	14.8886	37	14.8886	17	14.8886	23	14.8886	12	14.8886	14	14.8886	26	14.8886	27	14.8886	27	14.8886	35	14.8886	25	14.8886	16	14.8886	31	14.8886	27	14.8886	17
14.9081	22	14.9081	32	14.9081	24	14.9081	26	14.9081	22	14.9081	26	14.9081	24	14.9081	30	14.9081	33	14.9081	41	14.9081	32	14.9081	22	14.9081	34	14.9081	27	14.9081	31
14.9276	25	14.9276	28	14.9276	30	14.9276	22	14.9276	20	14.9276	28	14.9276	31	14.9276	21	14.9276	29	14.9276	30	14.9276	25	14.9276	16	14.9276	38	14.9276	33	14.9276	32
14.9471	17	14.9471	40	14.9471	26	14.9471	32	14.9471	23	14.9471	25	14.9471	26	14.9471	24	14.9471	22	14.9471	28	14.9471	28	14.9471	19	14.9471	20	14.9471	28	14.9471	23
14.9666	26	14.9666	31	14.9666	34	14.9666	22	14.9666	22	14.9666	26	14.9666	27	14.9666	23	14.9666	33	14.9666	27	14.9666	26	14.9666	21	14.9666	31	14.9666	24	14.9666	29
14.9861	18	14.9861	31	14.9861	26	14.9861	24	14.9861	17	14.9861	20	14.9861	20	14.9861	28	14.9861	35	14.9861	28	14.9861	42	14.9861	19	14.9861	21	14.9861	24	14.9861	17
15.0056	19	15.0056	28	15.0056	28	15.0056	20	15.0056	25	15.0056	30	15.0056	17	15.0056	31	15.0056	26	15.0056	30	15.0056	21	15.0056	11	15.0056	25	15.0056	28	15.0056	26
15.025	17	15.025	24	15.025	30	15.025	29	15.025	18	15.025	24	15.025	31	15.025	37	15.025	35	15.025	37	15.025	34	15.025	15	15.025	23	15.025	24	15.025	19
15.0445	13	15.0445	28	15.0445	31	15.0445	28	15.0445	16	15.0445	24	15.0445	21	15.0445	32	15.0445	35	15.0445	37	15.0445	34	15.0445	15	15.0445	25	15.0445	26	15.0445	29
15.064	28	15.064	36	15.064	25	15.064	18	15.064	22	15.064	25	15.064	27	15.064	25	15.064	18	15.064	28	15.064	25	15.064	19	15.064	20	15.064	22	15.064	23
15.0835	30	15.0835	29	15.0835	25	15.0835	26	15.0835	25	15.0835	19	15.0835	23	15.0835	21	15.0835	29	15.0835	33	15.0835	22	15.0835	11	15.0835	32	15.0835	23	15.0835	31
15.103	18	15.103	22	15.103	30	15.103	32	15.103	16	15.103	22	15.103	25	15.103	27	15.103	29	15.103	25	15.103	32	15.103	22	15.103	29	15.103	24	15.103	25
15.1225	16	15.1225	28	15.1225	27	15.1225	32	15.1225	15	15.1225	26	15.1225	19	15.1225	25	15.1225	20	15.1225	27	15.1225	23	15.1225	12	15.1225	26	15.1225	21	15.1225	31
15.142	17	15.142	44	15.142	26	15.142	32	15.142	24	15.142	21	15.142	35	15.142	30	15.142	30	15.142	32	15.142	24	15.142	24	15.142	38	15.142	23	15.142	26
15.1615	19	15.1615	33	15.1615	18	15.1615	28	15.1615	27	15.1615	30	15.1615	32	15.1615	34	15.1615	27	15.1615	32	15.1615	29	15.1615	16	15.1615	34	15.1615	26	15.1615	26
15.181	18	15.181	27	15.181	30	15.181	24	15.181	16	15.181	18	15.181	25	15.181	32	15.181	38	15.181	30	15.181	32	15.181	22	15.181	13	15.181	25	15.181	35
15.2005	13	15.2005	25	15.2005	18	15.2005	25	15.2005	19	15.2005	27	15.2005	18	15.2005	27	15.2005	38	15.2005	30	15.2005	27	15.2005	18	15.2005	29	15.2005	28	15.2005	30
15.2199	18	15.2199	25	15.2199	32	15.2199	26	15.2199	22	15.2199	22	15.2199	23	15.2199	29	15.2199	31	15.2199	33	15.2199	20	15.2199	24	15.2199	23	15.2199	20	15.2199	27
15.2394	14	15.2394	34	15.2394	26	15.2394	30	15.2394	18	15.2394	28	15.2394	15	15.2394	25	15.2394	34	15.2394	35	15.2394	19	15.2394	14	15.2394	24	15.2394	20	15.2394	22
15.2589	24	15.2589	35	15.2589	36	15.2589	35	15.2589	23	15.2589	25	15.2589	36	15.2589	36	15.2589	29	15.2589	34	15.2589	33	15.2589	17	15.2589	27	15.2589	20	15.2589	34
15.2784	25	15.2784	36	15.2784	29	15.2784	28	15.2784	21	15.2784	24	15.2784	30	15.2784	37	15.2784	28	15.2784	38	15.2784	31	15.2784	16	15.2784	36	15.2784	16	15.2784	36
15.2979	20	15.2979	27	15.2979	30	15.2979	26	15.2979	18	15.2979	19	15.2979	21	15.2979	25	15.2979	32	15.2979	25	15.2979	29	15.2979	23	15.2979	24	15.2979	22	15.2979	23
15.3174	21	15.3174	20	15.3174	21	15.3174	25	15.3174	20	15.3174	19	15.3174	21	15.3174	30	15.3174	35	15.3174	28	15.3174	39	15.3174	27	15.3174	29	15.3174	25	15.3174	36
15.3369	17	15.3369	37	15.3369	26	15.3369	33	15.3369	34	15.3369	19	15.3369	22	15.3369	33	15.3369	27	15.3369	36	15.3369	24	15.3369	16	15.3369	31	15.3369	22	15.3369	22
15.3564	16	15.3564	35	15.3564	26	15.3564	30	15.3564	25	15.3564	13	15.3564	29	15.3564	31	15.3564	25	15.3564	30	15.3564	27	15.3564	22	15.3564	19	15.3564	30	15.3564	24
15.3758	19	15.3758	33	15.3758	29	15.3758	44	15.3758	20	15.3758	18	15.3758	27	15.3758	37	15.3758	35	15.3758	42	15.3758	28	15.3758	20	15.3758	19	15.3758	31	15.3758	14
15.3953	21	15.3953	29	15.3953	35	15.3953	38	15.3953	22	15.3953	22	15.3953	21	15.3953	34	15.3953	31	15.3953	39	15.3953	29	15.3953	21	15.3953	21	15.3953	23	15.3953	39
15.4148	16	15.4148	36	15.4148	37	15.4148	25	15.4148	19	15.4148	17	15.4148	33	15.4148	32	15.4148	28	15.4148	37	15.4148	27	15.4148	18	15.4148	32	15.4148	30	15.4148	21
15.4343	20	15.4343	27	15.4343	30	15.4343	19	15.4343	35	15.4343	18	15.4343	24	15.4343	29	15.4343	28	15.4343	33	15.4343	29	15.4343	17	15.4343	20	15.4343	26	15.4343	27
15.4538	26	15.4538	34	15.4538	34	15.4538	33	15.4538	25	15.4538	16	15.4538	25	15.4538	32	15.4538	33	15.4538	19	15.4538	31	15.4538	15	15.4538	32	15.4538	32	15.4538	13
15.4733	21	15.4733	29	15.4733	23	15.4733	17	15.4733	12	15.4733	22	15.4733	29	15.4733	29	15.4733	32	15.4733	37	15.4733	28	15.4733	24	15.4733	31	15.4733	25	15.4733	28
15.4928	17	15.4928	26	15.4928	30	15.4928	31	15.4928	21	15.4928	29	15.4928	22	15.4928	30	15.4928	38	15.4928	37	15.4928	32	15.4928	17	15.4928	22	15.4928	27	15.4928	33
15.5123	16	15.5123	36	15.5123	37	15.5123	21	15.5123	25	15.5123	19	15.5123	19	15.5123	40	15.5123	38	15.5123	39	15.5123	23	15.5123	18	15.5123	29	15.5123	25	15.5123	27
15.5318	18	15.5318	30	15.5318	27	15.5318	34	15.5318	18	15.5318	34	15.5318	22	15.5318	31	15.5318	38	15.5318	37	15.5318	23	15.5318	22	15.5318	21	15.5318	18	15.5318	36
15.5513	18	15.5513	37	15.5513	25	15.5513	20	15.5513	16	15.5513	18	15.5513	22	15.5513	27	15.5513	29	15.5513	31	15.5513	31	15.5513	15	15.5513	27	15.5513	30	15.5513	31
15.5708	14	15.5708	37	15.5708	28	15.5708	28	15.5708	18	15.5708	31	15.5708	28	15.5708	26	15.5708	25	15.5708	34	15.5708	30	15.5708	25	15.5708	30	15.5708	27	15.5708	36
15.5902	14	15.5902	24	15.5902	29	15.5902	33	15.5902	22	15.5902	29	15.5902	30	15.5902	29	15.5902	27	15.5902	31	15.5902	36	15.5902	20	15.5902	24	15.5902	24	15.5902	21
15.6097	18	15.6097	28	15.6097	26	15.6097	28	15.6097	27	15.6097	26	15.6097	20	15.6097	36	15.6097	28	15.6097	39	15.6097	24	15.6097	20	15.6097	28	15.6097	23	15.6097	35
15.6292	28	15.6292	36	15.6292	28	15.6292	25	15.6292	18	15.6292	31	15.6292	33	15.6292	33	15.6292	25	15.6292	45	15.6292	40	15.6292	18	15.6292	33	15.6292	29	15.6292	39
15.6487	20	15.6487	38	15.6487	31	15.6487	44	15.6487	22	15.6487	29	15.6487	22	15.6487	31	15.6487	37	15.6487	26	15.6487	28	15.6487	15	15.6487	37	15.6487	28	15.6487	29
15.6682	17	15.6682	39	15.6682	23	15.6682	25	15.6682	11	15.6682	15	15.6682	28	15.6682	33	15.6682	16	15.6682	31	15.6682	28	15.6682	23	15.6682	28	15.6682	23	15.6682	35
15.6877	16	15.6877	31	15.6877	23	15.6877	21	15.6877	19	15.6877	21	15.6877	18	15.6877	23	15.6877	32	15.6877	39	15.6877	27	15.6877	19	15.6877	35	15.6877	19	15.6877	22
15.7072	23	15.7072	32	15.7072	27	15.7072	33	15.7072	22	15.7072	16	15.7072	31	15.7072	34	15.7072	27	15.7072	30	15.7072	24	15.7072	25	15.7072	27	15.7072	19	15.7072	32
15.7267	18	15.7267	34	15.7267	23	15.7267	31	15.7267	17	15.7267	23	15.7267	26	15.7267	29	15.7267	25	15.7267	39	15.7267	30	15.7267	19	15.7267	17	15.7267	27	15.7267	30
15.7462	22	15.7462	36	15.7462	31	15.7462	32	15.7462	14	15.7462	22	15.7462	17	15.7462	36	15.7462	27	15.7462	42	15.7462	25	15.7462	19	15.7462	40	15.7462	26	15.7462	37
15.7656	18	15.7656	30	15.7656	22	15.7656	20	15.7656	14	15.7656	25	15.7656	36	15.7656	26	15.7656	35	15.7656	31	15.7656	27	15.7656	17	15.7656	42	15.7656	23	15.7656	30
15.7851	17	15.7851	34	15.7851	35	15.7851	30	15.7851	23	15.7851	19	15.7851	22	15.7851	34	15.7851	42	15.7851	23	15.7851	36	15.7851	22	15.7851	28	15.7851	25	15.7851	30
15.8046	18	15.8046	36	15.8046	26	15.8046	20	15.8046	27	15.8046	19	15.8046	26	15.8046	27	15.8046	34	15.8046	33	15.8046	35	15.8046	17	15.8046	26	15.8046	19	15.8046	45
15.8241	17	15.8241	31	15.8241	27	15.8241	28	15.8241	27	15.8241	30	15.8241	21	15.8241	44	15.8241	27	15.8241	30	15.8241	37	15.8241	24	15.8241	36	15.8241	21	15.8241	38
15.8436	12	15.8436	25	15.8436	24	15.8436	22	15.8436	20	15.8436	30	15.8436	19	15.8436	32	15.8436	23	15.8436	35	15.8436	34	15.8436	24	15.8436	27	15.8436	20	15.8436	27
15.8631	18	15.8631	29	15.8631	20	15.8631	35	15.8631	19	15.8631	25	15.8631	21	15.8631	34	15.8631	29	15.8631	35	15.8631	35	15.8631	14	15.8631	36	15.8631	24	15.8631	36
15.8826	21	15.8826	39	15.8826	31	15.8826	37	15.8826	19	15.8826	26	15.8826	25	15.8826	29	15.8826	28	15.8826	29	15.8826	26	15.8826	25	15.8826	30	15.8826	16	15.8826	38
15.9021	26	15.9021	30	15.9021	27	15.9021	39	15.9021	14	15.9021	18	15.9021	30	15.9021	32	15.9021	34	15.9021	42	15.9021	26	15.9021	22	15.9021	24	15.9021	22	15.9021	33
15.9216	22	15.9216	37	15.9216	27	15.9216	26	15.9216	18	15.9216	22	15.9216	24	15.9216	32	15.9216	33	15.9216	33	15.9216	37	15.9216	18	15.9216	37	15.9216	41	15.9216	31
15.9411	18	15.9411	36	15.9411	37	15.9411	22	15.9411	21	15.9411	31	15.9411	35	15.9411	29	15.9411	30	15.9411	32	15.9411	26	15.9411	23	15.9411	31	15.9411	25	15.9411	15
15.9605	17	15.9605	38	15.9605	27	15.9605	31	15.9605	22	15.9605	23	15.9605	30	15.9605	29	15.9605	35	15.9605	38	15.9605	24	15.9605	18	15.9605	34	15.9605	27	15.9605	20
15.98	21	15.98	24	15.98	48	15.98	22	15.98	28	15.98	29	15.98	21	15.98	38	15.98	23	15.98	28	15.98	26	15.98	12	15.98	31	15.98	33	15.98	34
15.9995	16	15.9995	32	15.9995	24	15.9995	24	15.9995	20	15.9995	20	15.9995	27	15.9995	24	15.9995	29	15.9995	44	15.9995	23	15.9995	26	15.9995	30	15.9995	22	15.9995	31
16.019	21	16.019	28	16.019	36	16.019	30	16.019	26	16.019	22	16.019	31	16.019	42	16.019	36	16.019	30	16.019	34	16.019	21	16.019	27	16.019	20	16.019	30
16.0385	25	16.0385	30	16.0385	26	16.0385	25	16.0385	20	16.0385	21	16.0385	32	16.0385	39	16.0385	30	16.0385	48	16.0385	23	16.0385	15	16.0385	28	16.0385	25	16.0385	28
16.058	12	16.058	31	16.058	36	16.058	33	16.058	18	16.058	26	16.058	28	16.058	39	16.058	31	16.058	32	16.058	20	16.058	18	16.058	35	16.058	28	16.058	37
16.0775	25	16.0775	29	16.0775	28	16.0775	26	16.0775	23	16.0775	22	16.0775	30	16.0775	41	16.0775	46	16.0775	39	16.0775	27	16.0775	18	16.0775	34	16.0775	20	16.0775	22
16.097	22	16.097	35	16.097	33	16.097	28	16.097	28	16.097	23	16.097	27	16.097	32	16.097	47	16.097	42	16.097	28	16.097	16	16.097	29	16.097	29	16.097	41
16.1165	19	16.1165	35	16.1165	25	16.1165	35	16.1165	18	16.1165	20	16.1165	32	16.1165	39	16.1165	27	16.1165	32	16.1165	25	16.1165	16	16.1165	24	16.1165	32	16.1165	27
16.1359	22	16.1359	43	16.1359	27	16.1359	49	16.1359	22	16.1359	14	16.1359	26	16.1359	31	16.1359	32	16.1359	32	16.1359	34	16.1359	24	16.1359	27	16.1359	28	16.1359	27
16.1554	13	16.1554	26	16.1554	26	16.1554	35	16.1554	21	16.1554	21	16.1554	27	16.1554	36	16.1554	18	16.1554	33	16.1554	24	16.1554	17	16.1554	19	16.1554	25	16.1554	31
16.1749	20	16.1749	30	16.1749	26	16.1749	32	16.1749	19	16.1749	20	16.1749	26	16.1749	27	16.1749	45	16.1749	49	16.1749	30	16.1749	24	16.1749	22	16.1749	22	16.1749	34
16.1944	18	16.1944	37	16.1944	21	16.1944	29	16.1944	20	16.1944	27	16.1944	22	16.1944	41	16.1944	32	16.1944	33	16.1944	39	16.1944	30	16.1944	25	16.1944	27	16.1944	39
16.2139	23	16.2139	26	16.2139	26	16.2139	36	16.2139	21	16.2139	30	16.2139	22	16.2139	34	16.2139	30	16.2139	28	16.2139	39	16.2139	20	16.2139	32	16.2139	25	16.2139	27
16.2334	22	16.2334	34	16.2334	32	16.2334	33	16.2334	18	16.2334	22	16.2334	30	16.2334	31	16.2334	27	16.2334	45	16.2334	33	16.2334	15	16.2334	34	16.2334	27	16.2334	26
16.2529	23	16.2529	26	16.2529	28	16.2529	25	16.2529	27	16.2529	28	16.2529	25	16.2529	38	16.2529	28	16.2529	41	16.2529	28	16.2529	28	16.2529	30	16.2529	30	16.2529	36
16.2724	21	16.2724	40	16.2724	28	16.2724	34	16.2724	22	16.2724	23	16.2724	19	16.2724	36	16.2724	39	16.2724	36	16.2724	28	16.2724	13	16.2724	36	16.2724	25	16.2724	27
16.2919	29	16.2919	35	16.2919	22	16.2919	39	16.2919	25	16.2919	21	16.2919	22	16.2919	32	16.2919	34	16.2919	36	16.2919	40	16.2919	19	16.2919	27	16.2919	28	16.2919	27
16.3113	20	16.3113	45	16.3113	35	16.3113	36	16.3113	24	16.3113	17	16.3113	35	16.3113	30	16.3113	34	16.3113	33	16.3113	33	16.3113	16	16.3113	23	16.3113	37	16.3113	22
16.3308	26	16.3308	29	16.3308	18	16.3308	31	16.3308	19	16.3308	25	16.3308	29	16.3308	30	16.3308	40	16.3308	37	16.3308	27	16.3308	22	16.3308	28	16.3308	39	16.3308	31
16.3503	21	16.3503	28	16.3503	28	16.3503	27	16.3503	19	16.3503	18	16.3503	28	16.3503	27	16.3503	33	16.3503	38	16.3503	31	16.3503	19	16.3503	44	16.3503	30	16.3503	42
16.3698	20	16.3698	38	16.3698	33	16.3698	39	16.3698	22	16.3698	18	16.3698	33	16.3698	34	16.3698	31	16.3698	37	16.3698	31	16.3698	27	16.3698	31	16.3698	30	16.3698	27
16.3893	29	16.3893	36	16.3893	23	16.3893	34	16.3893	30	16.3893	31	16.3893	20	16.3893	43	16.3893	31	16.3893	45	16.3893	29	16.3893	23	16.3893	39	16.3893	26	16.3893	31
16.4088	25	16.4088	44	16.4088	22	16.4088	40	16.4088	26	16.4088	17	16.4088	29	16.4088	36	16.4088	29	16.4088	48	16.4088	29	16.4088	17	16.4088	24	16.4088	30	16.4088	25
16.4283	27	16.4283	33	16.4283	35	16.4283	26	16.4283	18	16.4283	29	16.4283	25	16.4283	35	16.4283	37	16.4283	44	16.4283	31	16.4283	29	16.4283	33	16.4283	27	16.4283	34
16.4478	30	16.4478	27	16.4478	29	16.4478	35	16.4478	26	16.4478	20	16.4478	31	16.4478	32	16.4478	45	16.4478	34	16.4478	32	16.4478	14	16.4478	37	16.4478	33	16.4478	41
16.4673	30	16.4673	39	16.4673	25	16.4673	27	16.4673	19	16.4673	21	16.4673	39	16.4673	50	16.4673	40	16.4673	40	16.4673	34	16.4673	22	16.4673	28	16.4673	32	16.4673	35
16.4868	24	16.4868	34	16.4868	29	16.4868	23	16.4868	23	16.4868	21	16.4868	24	16.4868	38	16.4868	48	16.4868	42	16.4868	35	16.4868	27	16.4868	27	16.4868	24	16.4868	30
16.5062	14	16.5062	37	16.5062	35	16.5062	41	16.5062	24	16.5062	29	16.5062	36	16.5062	28	16.5062	32	16.5062	35	16.5062	30	16.5062	26	16.5062	38	16.5062	42	16.5062	25
16.5257	26	16.5257	40	16.5257	29	16.5257	44	16.5257	16	16.5257	25	16.5257	30	16.5257	36	16.5257	28	16.5257	36	16.5257	36	16.5257	23	16.5257	37	16.5257	31	16.5257	30
16.5452	27	16.5452	55	16.5452	25	16.5452	40	16.5452	28	16.5452	29	16.5452	32	16.5452	38	16.5452	30	16.5452	34	16.5452	39	16.5452	13	16.5452	37	16.5452	20	16.5452	38
16.5647	37	16.5647	34	16.5647	27	16.5647	45	16.5647	30	16.5647	33	16.5647	27	16.5647	44	16.5647	36	16.5647	47	16.5647	49	16.5647	20	16.5647	44	16.5647	40	16.5647	35
16.5842	36	16.5842	30	16.5842	32	16.5842	49	16.5842	33	16.5842	29	16.5842	38	16.5842	39	16.5842	40	16.5842	47	16.5842	44	16.5842	27	16.5842	39	16.5842	31	16.5842	33
16.6037	30	16.6037	41	16.6037	31	16.6037	45	16.6037	33	16.6037	25	16.6037	29	16.6037	40	16.6037	46	16.6037	49	16.6037	31	16.6037	25	16.6037	31	16.6037	41	16.6037	30
16.6232	29	16.6232	48	16.6232	23	16.6232	28	16.6232	31	16.6232	28	16.6232	39	16.6232	25	16.6232	43	16.6232	46	16.6232	30	16.6232	29	16.6232	38	16.6232	23	16.6232	38
16.6427	21	16.6427	41	16.6427	34	16.6427	36	16.6427	37	16.6427	27	16.6427	35	16.6427	43	16.6427	46	16.6427	49	16.6427	41	16.6427	30	16.6427	33	16.6427	36	16.6427	40
16.6622	30	16.6622	32	16.6622	33	16.6622	47	16.6622	29	16.6622	33	16.6622	32	16.6622	30	16.6622	41	16.6622	54	16.6622	37	16.6622	35	16.6622	28	16.6622	41	16.6622	50
16.6816	37	16.6816	49	16.6816	43	16.6816	37	16.6816	26	16.6816	25	16.6816	35	16.6816	42	16.6816	40	16.6816	44	16.6816	48	16.6816	27	16.6816	41	16.6816	30	16.6816	41
16.7011	30	16.7011	41	16.7011	38	16.7011	44	16.7011	29	16.7011	27	16.7011	39	16.7011	42	16.7011	40	16.7011	45	16.7011	35	16.7011	24	16.7011	43	16.7011	38	16.7011	37
16.7206	36	16.7206	49	16.7206	37	16.7206	41	16.7206	32	16.7206	37	16.7206	33	16.7206	38	16.7206	39	16.7206	40	16.7206	41	16.7206	21	16.7206	36	16.7206	31	16.7206	31
16.7401	34	16.7401	32	16.7401	37	16.7401	32	16.7401	28	16.7401	40	16.7401	32	16.7401	33	16.7401	41	16.7401	54	16.7401	39	16.7401	34	16.7401	34	16.7401	43	16.7401	42
16.7596	33	16.7596	46	16.7596	30	16.7596	37	16.7596	34	16.7596	36	16.7596	32	16.7596	38	16.7596	43	16.7596	52	16.7596	44	16.7596	30	16.7596	39	16.7596	27	16.7596	22
16.7791	34	16.7791	53	16.7791	40	16.7791	38	16.7791	34	16.7791	36	16.7791	34	16.7791	30	16.7791	55	16.7791	43	16.7791	40	16.7791	37	16.7791	37	16.7791	35	16.7791	27
16.7986	25	16.7986	36	16.7986	43	16.7986	37	16.7986	39	16.7986	34	16.7986	33	16.7986	43	16.7986	53	16.7986	42	16.7986	51	16.7986	47	16.7986	34	16.7986	23	16.7986	44
16.8181	25	16.8181	43	16.8181	36	16.8181	32	16.8181	47	16.8181	41	16.8181	36	16.8181	39	16.8181	30	16.8181	43	16.8181	49	16.8181	35	16.8181	29	16.8181	36	16.8181	52
16.8376	26	16.8376	57	16.8376	42	16.8376	43	16.8376	38	16.8376	30	16.8376	42	16.8376	41	16.8376	54	16.8376	43	16.8376	47	16.8376	40	16.8376	33	16.8376	41	16.8376	30
16.8571	29	16.8571	44	16.8571	45	16.8571	52	16.8571	36	16.8571	31	16.8571	42	16.8571	36	16.8571	32	16.8571	46	16.8571	47	16.8571	49	16.8571	53	16.8571	32	16.8571	49
16.8765	32	16.8765	42	16.8765	39	16.8765	41	16.8765	27	16.8765	31	16.8765	33	16.8765	49	16.8765	45	16.8765	49	16.8765	49	16.8765	55	16.8765	45	16.8765	27	16.8765	33
16.896	32	16.896	38	16.896	34	16.896	35	16.896	37	16.896	37	16.896	40	16.896	34	16.896	49	16.896	61	16.896	48	16.896	54	16.896	38	16.896	39	16.896	34
16.9155	25	16.9155	47	16.9155	30	16.9155	42	16.9155	37	16.9155	44	16.9155	26	16.9155	45	16.9155	48	16.9155	45	16.9155	39	16.9155	37	16.9155	31	16.9155	35	16.9155	26
16.935	36	16.935	50	16.935	39	16.935	35	16.935	22	16.935	41	16.935	44	16.935	49	16.935	40	16.935	51	16.935	42	16.935	41	16.935	24	16.935	27	16.935	39
16.9545	20	16.9545	51	16.9545	25	16.9545	32	16.9545	30	16.9545	30	16.9545	30	16.9545	39	16.9545	47	16.9545	42	16.9545	39	16.9545	20	16.9545	56	16.9545	34	16.9545	33
16.974	27	16.974	57	16.974	35	16.974	28	16.974	19	16.974	27	16.974	26	16.974	44	16.974	32	16.974	51	16.974	46	16.974	35	16.974	44	16.974	36	16.974	31
16.9935	32	16.9935	46	16.9935	32	16.9935	35	16.9935	28	16.9935	24	16.9935	37	16.9935	44	16.9935	37	16.9935	52	16.9935	34	16.9935	29	16.9935	32	16.9935	31	16.9935	24
17.013	25	17.013	39	17.013	40	17.013	41	17.013	33	17.013	28	17.013	43	17.013	45	17.013	36	17.013	47	17.013	53	17.013	22	17.013	29	17.013	36	17.013	34
17.0325	24	17.0325	51	17.0325	22	17.0325	40	17.0325	31	17.0325	21	17.0325	38	17.0325	39	17.0325	51	17.0325	44	17.0325	51	17.0325	25	17.0325	31	17.0325	44	17.0325	42
17.0519	21	17.0519	49	17.0519	32	17.0519	27	17.0519	28	17.0519	32	17.0519	28	17.0519	40	17.0519	36	17.0519	45	17.0519	31	17.0519	20	17.0519	38	17.0519	37	17.0519	28
17.0714	27	17.0714	41	17.0714	30	17.0714	37	17.0714	30	17.0714	24	17.0714	41	17.0714	44	17.0714	24	17.0714	54	17.0714	22	17.0714	33	17.0714	23	17.0714	33	17.0714	34
17.0909	27	17.0909	47	17.0909	24	17.0909	40	17.0909	27	17.0909	38	17.0909	30	17.0909	41	17.0909	38	17.0909	40	17.0909	31	17.0909	22	17.0909	35	17.0909	34	17.0909	31
17.1104	23	17.1104	33	17.1104	30	17.1104	29	17.1104	24	17.1104	30	17.1104	27	17.1104	37	17.1104	36	17.1104	44	17.1104	36	17.1104	22	17.1104	39	17.1104	36	17.1104	37
17.1299	26	17.1299	33	17.1299	38	17.1299	29	17.1299	27	17.1299	34	17.1299	29	17.1299	36	17.1299	41	17.1299	36	17.1299	39	17.1299	30	17.1299	33	17.1299	37	17.1299	32
17.1494	16	17.1494	39	17.1494	26	17.1494	39	17.1494	28	17.1494	29	17.1494	35	17.1494	39	17.1494	34	17.1494	39	17.1494	34	17.1494	16	17.1494	34	17.1494	35	17.1494	30
17.1689	16	17.1689	43	17.1689	33	17.1689	42	17.1689	23	17.1689	17	17.1689	46	17.1689	42	17.1689	24	17.1689	43	17.1689	45	17.1689	24	17.1689	29	17.1689	24	17.1689	32
17.1884	37	17.1884	49	17.1884	26	17.1884	40	17.1884	29	17.1884	31	17.1884	39	17.1884	31	17.1884	51	17.1884	52	17.1884	31	17.1884	13	17.1884	42	17.1884	35	17.1884	35
17.2079	20	17.2079	35	17.2079	31	17.2079	32	17.2079	17	17.2079	39	17.2079	36	17.2079	39	17.2079	47	17.2079	34	17.2079	44	17.2079	29	17.2079	39	17.2079	32	17.2079	37
17.2274	23	17.2274	34	17.2274	29	17.2274	39	17.2274	16	17.2274	32	17.2274	31	17.2274	41	17.2274	33	17.2274	34	17.2274	36	17.2274	19	17.2274	27	17.2274	33	17.2274	29
17.2468	27	17.2468	46	17.2468	32	17.2468	31	17.2468	34	17.2468	27	17.2468	45	17.2468	47	17.2468	39	17.2468	36	17.2468	35	17.2468	28	17.2468	32	17.2468	25	17.2468	30
17.2663	21	17.2663	38	17.2663	29	17.2663	38	17.2663	40	17.2663	31	17.2663	26	17.2663	47	17.2663	46	17.2663	50	17.2663	34	17.2663	28	17.2663	23	17.2663	30	17.2663	26
17.2858	21	17.2858	39	17.2858	27	17.2858	29	17.2858	21	17.2858	17	17.2858	27	17.2858	30	17.2858	30	17.2858	40	17.2858	30	17.2858	19	17.2858	38	17.2858	30	17.2858	27
17.3053	26	17.3053	31	17.3053	27	17.3053	33	17.3053	34	17.3053	27	17.3053	24	17.3053	39	17.3053	32	17.3053	49	17.3053	42	17.3053	23	17.3053	35	17.3053	43	17.3053	35
17.3248	19	17.3248	37	17.3248	24	17.3248	30	17.3248	25	17.3248	20	17.3248	38	17.3248	33	17.3248	33	17.3248	32	17.3248	30	17.3248	24	17.3248	35	17.3248	23	17.3248	31
17.3443	22	17.3443	38	17.3443	39	17.3443	33	17.3443	16	17.3443	25	17.3443	30	17.3443	36	17.3443	48	17.3443	40	17.3443	37	17.3443	27	17.3443	27	17.3443	31	17.3443	46
17.3638	25	17.3638	37	17.3638	22	17.3638	38	17.3638	21	17.3638	31	17.3638	35	17.3638	32	17.3638	33	17.3638	45	17.3638	31	17.3638	32	17.3638	25	17.3638	20	17.3638	31
17.3833	25	17.3833	39	17.3833	28	17.3833	31	17.3833	22	17.3833	21	17.3833	37	17.3833	42	17.3833	43	17.3833	39	17.3833	38	17.3833	24	17.3833	22	17.3833	36	17.3833	38
17.4028	24	17.4028	34	17.4028	25	17.4028	46	17.4028	20	17.4028	21	17.4028	31	17.4028	33	17.4028	47	17.4028	49	17.4028	35	17.4028	16	17.4028	27	17.4028	35	17.4028	26
17.4222	18	17.4222	40	17.4222	32	17.4222	37	17.4222	16	17.4222	24	17.4222	27	17.4222	36	17.4222	34	17.4222	40	17.4222	46	17.4222	40	17.4222	33	17.4222	26	17.4222	35
17.4417	23	17.4417	34	17.4417	35	17.4417	36	17.4417	14	17.4417	32	17.4417	39	17.4417	33	17.4417	33	17.4417	44	17.4417	34	17.4417	13	17.4417	35	17.4417	32	17.4417	36
17.4612	25	17.4612	41	17.4612	21	17.4612	39	17.4612	16	17.4612	31	17.4612	37	17.4612	40	17.4612	38	17.4612	38	17.4612	55	17.4612	10	17.4612	26	17.4612	34	17.4612	38
17.4807	11	17.4807	25	17.4807	32	17.4807	29	17.4807	17	17.4807	29	17.4807	21	17.4807	38	17.4807	29	17.4807	34	17.4807	38	17.4807	19	17.4807	41	17.4807	30	17.4807	43
17.5002	15	17.5002	62	17.5002	29	17.5002	30	17.5002	24	17.5002	21	17.5002	35	17.5002	39	17.5002	36	17.5002	49	17.5002	44	17.5002	19	17.5002	28	17.5002	22	17.5002	32
17.5197	14	17.5197	35	17.5197	33	17.5197	32	17.5197	17	17.5197	21	17.5197	33	17.5197	42	17.5197	42	17.5197	35	17.5197	31	17.5197	28	17.5197	50	17.5197	27	17.5197	34
17.5392	24	17.5392	44	17.5392	26	17.5392	34	17.5392	29	17.5392	25	17.5392	27	17.5392	39	17.5392	34	17.5392	30	17.5392	37	17.5392	18	17.5392	30	17.5392	36	17.5392	35
17.5587	26	17.5587	38	17.5587	36	17.5587	30	17.5587	21	17.5587	22	17.5587	33	17.5587	45	17.5587	36	17.5587	45	17.5587	38	17.5587	24	17.5587	30	17.5587	27	17.5587	31
17.5782	23	17.5782	31	17.5782	23	17.5782	33	17.5782	27	17.5782	26	17.5782	34	17.5782	43	17.5782	39	17.5782	40	17.5782	32	17.5782	26	17.5782	41	17.5782	31	17.5782	31
17.5976	22	17.5976	32	17.5976	30	17.5976	30	17.5976	23	17.5976	35	17.5976	30	17.5976	41	17.5976	47	17.5976	41	17.5976	38	17.5976	19	17.5976	26	17.5976	36	17.5976	31
17.6171	21	17.6171	41	17.6171	27	17.6171	31	17.6171	24	17.6171	30	17.6171	34	17.6171	47	17.6171	34	17.6171	31	17.6171	33	17.6171	20	17.6171	34	17.6171	30	17.6171	32
17.6366	23	17.6366	44	17.6366	29	17.6366	38	17.6366	28	17.6366	23	17.6366	24	17.6366	35	17.6366	34	17.6366	37	17.6366	26	17.6366	17	17.6366	31	17.6366	27	17.6366	30
17.6561	30	17.6561	35	17.6561	32	17.6561	25	17.6561	30	17.6561	31	17.6561	30	17.6561	47	17.6561	42	17.6561	44	17.6561	25	17.6561	19	17.6561	32	17.6561	27	17.6561	29
17.6756	20	17.6756	38	17.6756	25	17.6756	40	17.6756	23	17.6756	22	17.6756	32	17.6756	38	17.6756	41	17.6756	36	17.6756	33	17.6756	26	17.6756	30	17.6756	29	17.6756	35
17.6951	26	17.6951	42	17.6951	32	17.6951	34	17.6951	28	17.6951	21	17.6951	17	17.6951	40	17.6951	41	17.6951	40	17.6951	37	17.6951	15	17.6951	30	17.6951	25	17.6951	34
17.7146	24	17.7146	45	17.7146	31	17.7146	25	17.7146	22	17.7146	30	17.7146	27	17.7146	35	17.7146	35	17.7146	38	17.7146	33	17.7146	17	17.7146	32	17.7146	30	17.7146	23
17.7341	19	17.7341	43	17.7341	35	17.7341	27	17.7341	23	17.7341	28	17.7341	28	17.7341	48	17.7341	38	17.7341	46	17.7341	34	17.7341	20	17.7341	46	17.7341	31	17.7341	46
17.7536	29	17.7536	35	17.7536	40	17.7536	42	17.7536	18	17.7536	30	17.7536	38	17.7536	30	17.7536	36	17.7536	41	17.7536	24	17.7536	21	17.7536	30	17.7536	33	17.7536	29
17.7731	24	17.7731	29	17.7731	22	17.7731	41	17.7731	24	17.7731	33	17.7731	37	17.7731	31	17.7731	33	17.7731	36	17.7731	33	17.7731	22	17.7731	38	17.7731	29	17.7731	30
17.7925	20	17.7925	36	17.7925	19	17.7925	41	17.7925	22	17.7925	36	17.7925	34	17.7925	30	17.7925	37	17.7925	38	17.7925	32	17.7925	19	17.7925	38	17.7925	20	17.7925	32
17.812	24	17.812	38	17.812	30	17.812	37	17.812	23	17.812	32	17.812	36	17.812	41	17.812	40	17.812	43	17.812	29	17.812	30	17.812	38	17.812	37	17.812	26
17.8315	21	17.8315	40	17.8315	29	17.8315	28	17.8315	20	17.8315	23	17.8315	26	17.8315	40	17.8315	37	17.8315	38	17.8315	35	17.8315	17	17.8315	36	17.8315	27	17.8315	28
17.851	24	17.851	47	17.851	18	17.851	43	17.851	22	17.851	27	17.851	35	17.851	46	17.851	51	17.851	56	17.851	43	17.851	25	17.851	30	17.851	35	17.851	40
17.8705	29	17.8705	46	17.8705	25	17.8705	31	17.8705	27	17.8705	19	17.8705	37	17.8705	41	17.8705	31	17.8705	32	17.8705	40	17.8705	27	17.8705	39	17.8705	34	17.8705	39
17.89	25	17.89	33	17.89	32	17.89	33	17.89	36	17.89	31	17.89	33	17.89	36	17.89	41	17.89	43	17.89	28	17.89	20	17.89	32	17.89	31	17.89	31
17.9095	18	17.9095	33	17.9095	34	17.9095	33	17.9095	23	17.9095	22	17.9095	38	17.9095	54	17.9095	36	17.9095	41	17.9095	30	17.9095	18	17.9095	42	17.9095	24	17.9095	24
17.929	20	17.929	39	17.929	18	17.929	27	17.929	35	17.929	20	17.929	33	17.929	38	17.929	39	17.929	45	17.929	34	17.929	23	17.929	38	17.929	25	17.929	26
17.9485	21	17.9485	34	17.9485	32	17.9485	35	17.9485	24	17.9485	27	17.9485	30	17.9485	38	17.9485	49	17.9485	39	17.9485	42	17.9485	29	17.9485	36	17.9485	30	17.9485	30
17.9679	19	17.9679	42	17.9679	33	17.9679	34	17.9679	30	17.9679	23	17.9679	31	17.9679	38	17.9679	36	17.9679	38	17.9679	28	17.9679	24	17.9679	37	17.9679	35	17.9679	40
17.9874	21	17.9874	50	17.9874	36	17.9874	35	17.9874	18	17.9874	16	17.9874	35	17.9874	36	17.9874	42	17.9874	34	17.9874	44	17.9874	26	17.9874	42	17.9874	31	17.9874	31
18.0069	17	18.0069	41	18.0069	30	18.0069	29	18.0069	23	18.0069	27	18.0069	35	18.0069	40	18.0069	43	18.0069	57	18.0069	35	18.0069	26	18.0069	33	18.0069	27	18.0069	22
18.0264	23	18.0264	34	18.0264	22	18.0264	32	18.0264	20	18.0264	27	18.0264	53	18.0264	37	18.0264	32	18.0264	47	18.0264	35	18.0264	23	18.0264	57	18.0264	35	18.0264	33
18.0459	26	18.0459	49	18.0459	36	18.0459	37	18.0459	30	18.0459	20	18.0459	33	18.0459	38	18.0459	47	18.0459	34	18.0459	42	18.0459	20	18.0459	37	18.0459	37	18.0459	27
18.0654	18	18.0654	42	18.0654	30	18.0654	42	18.0654	24	18.0654	40	18.0654	26	18.0654	44	18.0654	38	18.0654	41	18.0654	50	18.0654	20	18.0654	36	18.0654	27	18.0654	33
18.0849	28	18.0849	39	18.0849	23	18.0849	43	18.0849	25	18.0849	24	18.0849	39	18.0849	38	18.0849	41	18.0849	50	18.0849	31	18.0849	25	18.0849	35	18.0849	38	18.0849	39
18.1044	26	18.1044	49	18.1044	35	18.1044	34	18.1044	24	18.1044	34	18.1044	32	18.1044	44	18.1044	46	18.1044	56	18.1044	44	18.1044	19	18.1044	34	18.1044	22	18.1044	27
18.1239	24	18.1239	42	18.1239	29	18.1239	40	18.1239	22	18.1239	18	18.1239	32	18.1239	42	18.1239	40	18.1239	46	18.1239	43	18.1239	22	18.1239	36	18.1239	37	18.1239	43
18.1434	27	18.1434	45	18.1434	26	18.1434	29	18.1434	38	18.1434	31	18.1434	35	18.1434	38	18.1434	40	18.1434	45	18.1434	41	18.1434	23	18.1434	31	18.1434	38	18.1434	37
18.1628	22	18.1628	45	18.1628	26	18.1628	37	18.1628	27	18.1628	24	18.1628	44	18.1628	40	18.1628	31	18.1628	48	18.1628	35	18.1628	24	18.1628	21	18.1628	35	18.1628	28
18.1823	32	18.1823	51	18.1823	21	18.1823	29	18.1823	22	18.1823	27	18.1823	34	18.1823	42	18.1823	39	18.1823	42	18.1823	27	18.1823	17	18.1823	26	18.1823	38	18.1823	38
18.2018	21	18.2018	41	18.2018	27	18.2018	34	18.2018	18	18.2018	26	18.2018	40	18.2018	42	18.2018	42	18.2018	50	18.2018	52	18.2018	20	18.2018	34	18.2018	31	18.2018	37
18.2213	24	18.2213	50	18.2213	22	18.2213	34	18.2213	28	18.2213	24	18.2213	33	18.2213	36	18.2213	45	18.2213	42	18.2213	37	18.2213	27	18.2213	42	18.2213	28	18.2213	34
18.2408	24	18.2408	38	18.2408	39	18.2408	31	18.2408	22	18.2408	21	18.2408	28	18.2408	38	18.2408	40	18.2408	53	18.2408	33	18.2408	22	18.2408	35	18.2408	42	18.2408	37
18.2603	23	18.2603	49	18.2603	25	18.2603	36	18.2603	27	18.2603	27	18.2603	35	18.2603	45	18.2603	64	18.2603	46	18.2603	41	18.2603	17	18.2603	35	18.2603	19	18.2603	47
18.2798	27	18.2798	44	18.2798	30	18.2798	41	18.2798	34	18.2798	32	18.2798	32	18.2798	39	18.2798	34	18.2798	50	18.2798	32	18.2798	32	18.2798	42	18.2798	35	18.2798	31
18.2993	27	18.2993	32	18.2993	26	18.2993	31	18.2993	26	18.2993	28	18.2993	41	18.2993	36	18.2993	32	18.2993	53	18.2993	46	18.2993	17	18.2993	47	18.2993	36	18.2993	30
18.3188	23	18.3188	43	18.3188	36	18.3188	33	18.3188	30	18.3188	37	18.3188	36	18.3188	41	18.3188	35	18.3188	46	18.3188	29	18.3188	22	18.3188	31	18.3188	36	18.3188	46
18.3382	11	18.3382	44	18.3382	36	18.3382	37	18.3382	21	18.3382	31	18.3382	33	18.3382	39	18.3382	50	18.3382	33	18.3382	47	18.3382	21	18.3382	43	18.3382	38	18.3382	44
18.3577	19	18.3577	40	18.3577	32	18.3577	49	18.3577	22	18.3577	18	18.3577	43	18.3577	49	18.3577	45	18.3577	43	18.3577	43	18.3577	29	18.3577	34	18.3577	28	18.3577	41
18.3772	17	18.3772	47	18.3772	30	18.3772	30	18.3772	23	18.3772	22	18.3772	37	18.3772	43	18.3772	38	18.3772	46	18.3772	34	18.3772	26	18.3772	36	18.3772	39	18.3772	46
18.3967	28	18.3967	38	18.3967	21	18.3967	32	18.3967	21	18.3967	34	18.3967	35	18.3967	36	18.3967	42	18.3967	43	18.3967	43	18.3967	32	18.3967	36	18.3967	36	18.3967	44
18.4162	21	18.4162	38	18.4162	34	18.4162	30	18.4162	30	18.4162	35	18.4162	42	18.4162	54	18.4162	35	18.4162	45	18.4162	37	18.4162	23	18.4162	44	18.4162	28	18.4162	35
18.4357	26	18.4357	28	18.4357	29	18.4357	30	18.4357	22	18.4357	32	18.4357	38	18.4357	53	18.4357	39	18.4357	54	18.4357	38	18.4357	26	18.4357	41	18.4357	38	18.4357	43
18.4552	22	18.4552	37	18.4552	29	18.4552	46	18.4552	32	18.4552	38	18.4552	37	18.4552	41	18.4552	37	18.4552	35	18.4552	32	18.4552	39	18.4552	28	18.4552	33	18.4552	30
18.4747	21	18.4747	47	18.4747	29	18.4747	36	18.4747	21	18.4747	34	18.4747	30	18.4747	40	18.4747	47	18.4747	44	18.4747	37	18.4747	24	18.4747	42	18.4747	41	18.4747	36
18.4942	28	18.4942	46	18.4942	36	18.4942	39	18.4942	31	18.4942	37	18.4942	44	18.4942	51	18.4942	40	18.4942	47	18.4942	32	18.4942	29	18.4942	58	18.4942	38	18.4942	34
18.5136	26	18.5136	51	18.5136	32	18.5136	34	18.5136	23	18.5136	31	18.5136	35	18.5136	40	18.5136	39	18.5136	60	18.5136	40	18.5136	21	18.5136	32	18.5136	25	18.5136	36
18.5331	28	18.5331	39	18.5331	27	18.5331	39	18.5331	26	18.5331	25	18.5331	38	18.5331	47	18.5331	42	18.5331	63	18.5331	35	18.5331	26	18.5331	35	18.5331	26	18.5331	37
18.5526	27	18.5526	38	18.5526	32	18.5526	29	18.5526	25	18.5526	32	18.5526	49	18.5526	44	18.5526	55	18.5526	48	18.5526	33	18.5526	32	18.5526	34	18.5526	30	18.5526	28
18.5721	27	18.5721	58	18.5721	21	18.5721	35	18.5721	37	18.5721	27	18.5721	32	18.5721	47	18.5721	46	18.5721	49	18.5721	35	18.5721	27	18.5721	29	18.5721	33	18.5721	32
18.5916	19	18.5916	32	18.5916	26	18.5916	33	18.5916	27	18.5916	32	18.5916	33	18.5916	62	18.5916	36	18.5916	54	18.5916	43	18.5916	26	18.5916	33	18.5916	28	18.5916	35
18.6111	22	18.6111	52	18.6111	39	18.6111	43	18.6111	27	18.6111	30	18.6111	30	18.6111	40	18.6111	36	18.6111	47	18.6111	36	18.6111	26	18.6111	38	18.6111	31	18.6111	34
18.6306	23	18.6306	53	18.6306	29	18.6306	47	18.6306	25	18.6306	32	18.6306	30	18.6306	53	18.6306	24	18.6306	55	18.6306	56	18.6306	26	18.6306	32	18.6306	39	18.6306	37
18.6501	23	18.6501	46	18.6501	23	18.6501	35	18.6501	30	18.6501	27	18.6501	31	18.6501	50	18.6501	41	18.6501	49	18.6501	49	18.6501	20	18.6501	32	18.6501	42	18.6501	37
18.6696	31	18.6696	50	18.6696	35	18.6696	46	18.6696	25	18.6696	22	18.6696	28	18.6696	41	18.6696	35	18.6696	53	18.6696	37	18.6696	38	18.6696	41	18.6696	36	18.6696	32
18.6891	23	18.6891	35	18.6891	30	18.6891	33	18.6891	21	18.6891	34	18.6891	29	18.6891	44	18.6891	49	18.6891	44	18.6891	45	18.6891	31	18.6891	43	18.6891	32	18.6891	33
18.7085	29	18.7085	46	18.7085	39	18.7085	36	18.7085	35	18.7085	26	18.7085	45	18.7085	47	18.7085	48	18.7085	50	18.7085	34	18.7085	30	18.7085	32	18.7085	44	18.7085	39
18.728	29	18.728	43	18.728	31	18.728	31	18.728	44	18.728	32	18.728	34	18.728	50	18.728	53	18.728	52	18.728	39	18.728	37	18.728	42	18.728	41	18.728	35
18.7475	30	18.7475	41	18.7475	42	18.7475	33	18.7475	37	18.7475	22	18.7475	49	18.7475	50	18.7475	42	18.7475	45	18.7475	40	18.7475	21	18.7475	35	18.7475	33	18.7475	42
18.767	24	18.767	45	18.767	37	18.767	36	18.767	31	18.767	28	18.767	45	18.767	50	18.767	46	18.767	51	18.767	54	18.767	28	18.767	44	18.767	36	18.767	41
18.7865	24	18.7865	47	18.7865	26	18.7865	40	18.7865	32	18.7865	30	18.7865	46	18.7865	48	18.7865	38	18.7865	48	18.7865	50	18.7865	43	18.7865	40	18.7865	35	18.7865	43
18.806	29	18.806	46	18.806	33	18.806	44	18.806	33	18.806	30	18.806	37	18.806	48	18.806	56	18.806	73	18.806	54	18.806	41	18.806	48	18.806	35	18.806	45
18.8255	34	18.8255	51	18.8255	31	18.8255	51	18.8255	30	18.8255	30	18.8255	46	18.8255	50	18.8255	53	18.8255	45	18.8255	39	18.8255	31	18.8255	36	18.8255	33	18.8255	40
18.845	39	18.845	44	18.845	41	18.845	41	18.845	34	18.845	43	18.845	39	18.845	46	18.845	43	18.845	53	18.845	57	18.845	36	18.845	37	18.845	35	18.845	35
18.8645	42	18.8645	41	18.8645	42	18.8645	31	18.8645	25	18.8645	33	18.8645	43	18.8645	50	18.8645	48	18.8645	52	18.8645	50	18.8645	42	18.8645	40	18.8645	35	18.8645	43
18.8839	32	18.8839	45	18.8839	24	18.8839	38	18.8839	21	18.8839	29	18.8839	49	18.8839	46	18.8839	42	18.8839	48	18.8839	57	18.8839	44	18.8839	44	18.8839	29	18.8839	42
18.9034	32	18.9034	47	18.9034	37	18.9034	46	18.9034	29	18.9034	32	18.9034	37	18.9034	45	18.9034	45	18.9034	44	18.9034	32	18.9034	28	18.9034	39	18.9034	34	18.9034	30
18.9229	39	18.9229	46	18.9229	28	18.9229	41	18.9229	31	18.9229	31	18.9229	45	18.9229	58	18.9229	49	18.9229	56	18.9229	31	18.9229	40	18.9229	33	18.9229	49	18.9229	35
18.9424	17	18.9424	59	18.9424	41	18.9424	36	18.9424	24	18.9424	31	18.9424	28	18.9424	61	18.9424	45	18.9424	53	18.9424	49	18.9424	26	18.9424	37	18.9424	37	18.9424	47
18.9619	19	18.9619	56	18.9619	38	18.9619	32	18.9619	26	18.9619	37	18.9619	48	18.9619	52	18.9619	36	18.9619	42	18.9619	43	18.9619	33	18.9619	44	18.9619	38	18.9619	33
18.9814	23	18.9814	42	18.9814	30	18.9814	42	18.9814	27	18.9814	28	18.9814	41	18.9814	55	18.9814	47	18.9814	55	18.9814	45	18.9814	17	18.9814	44	18.9814	31	18.9814	41
19.0009	30	19.0009	48	19.0009	35	19.0009	33	19.0009	32	19.0009	27	19.0009	38	19.0009	43	19.0009	45	19.0009	44	19.0009	42	19.0009	26	19.0009	55	19.0009	43	19.0009	37
19.0204	27	19.0204	52	19.0204	38	19.0204	50	19.0204	39	19.0204	30	19.0204	42	19.0204	48	19.0204	41	19.0204	55	19.0204	39	19.0204	29	19.0204	38	19.0204	29	19.0204	43
19.0399	27	19.0399	48	19.0399	24	19.0399	42	19.0399	25	19.0399	32	19.0399	52	19.0399	40	19.0399	45	19.0399	49	19.0399	47	19.0399	28	19.0399	43	19.0399	34	19.0399	35
19.0593	20	19.0593	52	19.0593	27	19.0593	37	19.0593	23	19.0593	33	19.0593	41	19.0593	56	19.0593	35	19.0593	54	19.0593	44	19.0593	28	19.0593	47	19.0593	41	19.0593	28
19.0788	17	19.0788	39	19.0788	30	19.0788	41	19.0788	30	19.0788	30	19.0788	39	19.0788	52	19.0788	47	19.0788	49	19.0788	33	19.0788	26	19.0788	35	19.0788	38	19.0788	37
19.0983	16	19.0983	43	19.0983	26	19.0983	54	19.0983	37	19.0983	26	19.0983	50	19.0983	54	19.0983	38	19.0983	43	19.0983	45	19.0983	25	19.0983	31	19.0983	38	19.0983	36
19.1178	36	19.1178	36	19.1178	35	19.1178	39	19.1178	38	19.1178	28	19.1178	36	19.1178	50	19.1178	48	19.1178	42	19.1178	53	19.1178	25	19.1178	47	19.1178	42	19.1178	40
19.1373	25	19.1373	46	19.1373	32	19.1373	44	19.1373	33	19.1373	35	19.1373	30	19.1373	48	19.1373	52	19.1373	46	19.1373	53	19.1373	31	19.1373	41	19.1373	26	19.1373	35
19.1568	19	19.1568	51	19.1568	30	19.1568	43	19.1568	32	19.1568	31	19.1568	38	19.1568	43	19.1568	46	19.1568	44	19.1568	55	19.1568	25	19.1568	32	19.1568	43	19.1568	34
19.1763	24	19.1763	36	19.1763	25	19.1763	36	19.1763	24	19.1763	28	19.1763	40	19.1763	51	19.1763	47	19.1763	48	19.1763	50	19.1763	34	19.1763	42	19.1763	29	19.1763	38
19.1958	21	19.1958	49	19.1958	37	19.1958	38	19.1958	28	19.1958	38	19.1958	44	19.1958	44	19.1958	49	19.1958	54	19.1958	30	19.1958	42	19.1958	36	19.1958	37	19.1958	48
19.2153	28	19.2153	45	19.2153	34	19.2153	37	19.2153	24	19.2153	33	19.2153	53	19.2153	36	19.2153	39	19.2153	47	19.2153	41	19.2153	25	19.2153	37	19.2153	40	19.2153	53
19.2347	30	19.2347	54	19.2347	22	19.2347	42	19.2347	42	19.2347	29	19.2347	41	19.2347	55	19.2347	58	19.2347	45	19.2347	34	19.2347	25	19.2347	43	19.2347	27	19.2347	26
19.2542	31	19.2542	53	19.2542	31	19.2542	41	19.2542	30	19.2542	24	19.2542	35	19.2542	44	19.2542	50	19.2542	44	19.2542	44	19.2542	27	19.2542	25	19.2542	30	19.2542	35
19.2737	25	19.2737	39	19.2737	36	19.2737	34	19.2737	27	19.2737	38	19.2737	41	19.2737	38	19.2737	53	19.2737	40	19.2737	42	19.2737	33	19.2737	36	19.2737	50	19.2737	38
19.2932	27	19.2932	46	19.2932	30	19.2932	45	19.2932	28	19.2932	31	19.2932	31	19.2932	54	19.2932	38	19.2932	51	19.2932	49	19.2932	23	19.2932	46	19.2932	34	19.2932	47
19.3127	27	19.3127	53	19.3127	41	19.3127	44	19.3127	28	19.3127	25	19.3127	40	19.3127	53	19.3127	45	19.3127	48	19.3127	43	19.3127	24	19.3127	33	19.3127	37	19.3127	47
19.3322	19	19.3322	57	19.3322	35	19.3322	37	19.3322	35	19.3322	30	19.3322	31	19.3322	45	19.3322	47	19.3322	50	19.3322	48	19.3322	25	19.3322	43	19.3322	31	19.3322	51
19.3517	26	19.3517	52	19.3517	38	19.3517	31	19.3517	21	19.3517	30	19.3517	36	19.3517	45	19.3517	49	19.3517	52	19.3517	43	19.3517	23	19.3517	41	19.3517	38	19.3517	37
19.3712	19	19.3712	50	19.3712	29	19.3712	37	19.3712	24	19.3712	30	19.3712	40	19.3712	60	19.3712	43	19.3712	54	19.3712	45	19.3712	24	19.3712	33	19.3712	40	19.3712	40
19.3907	20	19.3907	47	19.3907	36	19.3907	39	19.3907	26	19.3907	35	19.3907	44	19.3907	35	19.3907	46	19.3907	42	19.3907	48	19.3907	27	19.3907	36	19.3907	36	19.3907	42
19.4102	31	19.4102	47	19.4102	33	19.4102	44	19.4102	28	19.4102	17	19.4102	40	19.4102	41	19.4102	47	19.4102	45	19.4102	38	19.4102	27	19.4102	42	19.4102	49	19.4102	31
19.4296	25	19.4296	47	19.4296	21	19.4296	42	19.4296	30	19.4296	37	19.4296	30	19.4296	44	19.4296	52	19.4296	45	19.4296	40	19.4296	27	19.4296	35	19.4296	36	19.4296	39
19.4491	22	19.4491	34	19.4491	34	19.4491	46	19.4491	37	19.4491	39	19.4491	37	19.4491	52	19.4491	54	19.4491	46	19.4491	41	19.4491	29	19.4491	35	19.4491	42	19.4491	50
19.4686	26	19.4686	41	19.4686	32	19.4686	43	19.4686	24	19.4686	33	19.4686	35	19.4686	41	19.4686	38	19.4686	56	19.4686	46	19.4686	24	19.4686	41	19.4686	43	19.4686	35
19.4881	29	19.4881	47	19.4881	28	19.4881	41	19.4881	28	19.4881	26	19.4881	39	19.4881	47	19.4881	44	19.4881	45	19.4881	44	19.4881	22	19.4881	52	19.4881	33	19.4881	36
19.5076	22	19.5076	43	19.5076	32	19.5076	50	19.5076	25	19.5076	33	19.5076	46	19.5076	50	19.5076	51	19.5076	48	19.5076	53	19.5076	22	19.5076	48	19.5076	34	19.5076	40
19.5271	28	19.5271	36	19.5271	34	19.5271	35	19.5271	30	19.5271	20	19.5271	44	19.5271	56	19.5271	45	19.5271	47	19.5271	49	19.5271	24	19.5271	52	19.5271	28	19.5271	42
19.5466	23	19.5466	50	19.5466	34	19.5466	51	19.5466	19	19.5466	37	19.5466	35	19.5466	51	19.5466	44	19.5466	44	19.5466	49	19.5466	32	19.5466	50	19.5466	45	19.5466	43
19.5661	35	19.5661	42	19.5661	32	19.5661	36	19.5661	34	19.5661	28	19.5661	40	19.5661	49	19.5661	44	19.5661	61	19.5661	45	19.5661	20	19.5661	43	19.5661	41	19.5661	43
19.5856	18	19.5856	54	19.5856	31	19.5856	47	19.5856	32	19.5856	35	19.5856	43	19.5856	35	19.5856	45	19.5856	48	19.5856	37	19.5856	27	19.5856	51	19.5856	31	19.5856	37
19.605	20	19.605	48	19.605	31	19.605	36	19.605	32	19.605	30	19.605	44	19.605	48	19.605	46	19.605	54	19.605	42	19.605	26	19.605	44	19.605	43	19.605	42
19.6245	19	19.6245	50	19.6245	33	19.6245	50	19.6245	24	19.6245	23	19.6245	37	19.6245	48	19.6245	40	19.6245	54	19.6245	48	19.6245	23	19.6245	35	19.6245	31	19.6245	41
19.644	31	19.644	60	19.644	43	19.644	34	19.644	20	19.644	29	19.644	41	19.644	40	19.644	36	19.644	40	19.644	38	19.644	31	19.644	50	19.644	33	19.644	36
19.6635	30	19.6635	48	19.6635	29	19.6635	37	19.6635	25	19.6635	41	19.6635	37	19.6635	57	19.6635	53	19.6635	38	19.6635	47	19.6635	21	19.6635	31	19.6635	39	19.6635	38
19.683	25	19.683	49	19.683	43	19.683	42	19.683	35	19.683	35	19.683	48	19.683	50	19.683	35	19.683	54	19.683	45	19.683	26	19.683	47	19.683	49	19.683	42
19.7025	25	19.7025	46	19.7025	26	19.7025	37	19.7025	35	19.7025	38	19.7025	38	19.7025	44	19.7025	47	19.7025	45	19.7025	40	19.7025	24	19.7025	46	19.7025	33	19.7025	38
19.722	32	19.722	52	19.722	34	19.722	45	19.722	36	19.722	23	19.722	31	19.722	37	19.722	52	19.722	56	19.722	61	19.722	25	19.722	38	19.722	44	19.722	33
19.7415	36	19.7415	59	19.7415	34	19.7415	38	19.7415	29	19.7415	25	19.7415	33	19.7415	50	19.7415	48	19.7415	36	19.7415	47	19.7415	26	19.7415	31	19.7415	31	19.7415	44
19.761	20	19.761	46	19.761	30	19.761	35	19.761	19	19.761	33	19.761	42	19.761	56	19.761	63	19.761	45	19.761	37	19.761	26	19.761	33	19.761	47	19.761	49
19.7804	33	19.7804	47	19.7804	40	19.7804	44	19.7804	30	19.7804	39	19.7804	31	19.7804	53	19.7804	45	19.7804	52	19.7804	55	19.7804	39	19.7804	32	19.7804	41	19.7804	39
19.7999	29	19.7999	44	19.7999	42	19.7999	46	19.7999	33	19.7999	40	19.7999	37	19.7999	59	19.7999	44	19.7999	63	19.7999	62	19.7999	29	19.7999	47	19.7999	33	19.7999	36
19.8194	26	19.8194	66	19.8194	31	19.8194	34	19.8194	23	19.8194	27	19.8194	34	19.8194	52	19.8194	48	19.8194	52	19.8194	47	19.8194	31	19.8194	33	19.8194	24	19.8194	43
19.8389	24	19.8389	48	19.8389	26	19.8389	42	19.8389	22	19.8389	32	19.8389	48	19.8389	50	19.8389	47	19.8389	52	19.8389	47	19.8389	29	19.8389	44	19.8389	45	19.8389	50
19.8584	30	19.8584	43	19.8584	31	19.8584	30	19.8584	24	19.8584	37	19.8584	42	19.8584	48	19.8584	59	19.8584	62	19.8584	41	19.8584	27	19.8584	45	19.8584	41	19.8584	58
19.8779	22	19.8779	35	19.8779	35	19.8779	41	19.8779	33	19.8779	28	19.8779	31	19.8779	60	19.8779	47	19.8779	56	19.8779	43	19.8779	26	19.8779	54	19.8779	40	19.8779	43
19.8974	22	19.8974	47	19.8974	35	19.8974	39	19.8974	29	19.8974	33	19.8974	45	19.8974	60	19.8974	57	19.8974	62	19.8974	48	19.8974	35	19.8974	53	19.8974	27	19.8974	44
19.9169	30	19.9169	65	19.9169	44	19.9169	45	19.9169	23	19.9169	32	19.9169	43	19.9169	50	19.9169	51	19.9169	58	19.9169	39	19.9169	20	19.9169	44	19.9169	48	19.9169	40
19.9364	31	19.9364	48	19.9364	38	19.9364	44	19.9364	29	19.9364	24	19.9364	42	19.9364	46	19.9364	55	19.9364	62	19.9364	50	19.9364	31	19.9364	33	19.9364	32	19.9364	47
19.9559	30	19.9559	55	19.9559	36	19.9559	38	19.9559	22	19.9559	24	19.9559	38	19.9559	46	19.9559	52	19.9559	60	19.9559	44	19.9559	17	19.9559	44	19.9559	41	19.9559	42
19.9753	26	19.9753	48	19.9753	18	19.9753	43	19.9753	32	19.9753	29	19.9753	36	19.9753	58	19.9753	47	19.9753	44	19.9753	48	19.9753	25	19.9753	37	19.9753	34	19.9753	39
19.9948	28	19.9948	52	19.9948	29	19.9948	32	19.9948	34	19.9948	25	19.9948	46	19.9948	56	19.9948	47	19.9948	57	19.9948	35	19.9948	24	19.9948	39	19.9948	50	19.9948	33
20.0143	26	20.0143	54	20.0143	44	20.0143	36	20.0143	35	20.0143	25	20.0143	43	20.0143	51	20.0143	49	20.0143	50	20.0143	51	20.0143	25	20.0143	38	20.0143	37	20.0143	51
20.0338	27	20.0338	44	20.0338	40	20.0338	53	20.0338	25	20.0338	31	20.0338	43	20.0338	56	20.0338	45	20.0338	63	20.0338	42	20.0338	31	20.0338	47	20.0338	44	20.0338	33
20.0533	24	20.0533	47	20.0533	46	20.0533	44	20.0533	24	20.0533	30	20.0533	43	20.0533	53	20.0533	43	20.0533	44	20.0533	55	20.0533	29	20.0533	37	20.0533	36	20.0533	40
20.0728	19	20.0728	51	20.0728	38	20.0728	44	20.0728	38	20.0728	30	20.0728	41	20.0728	40	20.0728	46	20.0728	59	20.0728	43	20.0728	21	20.0728	33	20.0728	39	20.0728	34
20.0923	27	20.0923	66	20.0923	38	20.0923	44	20.0923	33	20.0923	31	20.0923	46	20.0923	50	20.0923	46	20.0923	48	20.0923	53	20.0923	19	20.0923	31	20.0923	31	20.0923	39
20.1118	25	20.1118	53	20.1118	29	20.1118	35	20.1118	33	20.1118	28	20.1118	40	20.1118	50	20.1118	58	20.1118	39	20.1118	46	20.1118	31	20.1118	40	20.1118	41	20.1118	29
20.1313	39	20.1313	43	20.1313	30	20.1313	48	20.1313	21	20.1313	37	20.1313	45	20.1313	58	20.1313	41	20.1313	45	20.1313	41	20.1313	23	20.1313	37	20.1313	43	20.1313	48
20.1507	33	20.1507	54	20.1507	35	20.1507	36	20.1507	34	20.1507	25	20.1507	35	20.1507	46	20.1507	40	20.1507	66	20.1507	41	20.1507	19	20.1507	46	20.1507	40	20.1507	38
20.1702	29	20.1702	46	20.1702	38	20.1702	55	20.1702	24	20.1702	31	20.1702	46	20.1702	63	20.1702	57	20.1702	56	20.1702	28	20.1702	31	20.1702	34	20.1702	40	20.1702	33
20.1897	31	20.1897	46	20.1897	36	20.1897	35	20.1897	26	20.1897	40	20.1897	45	20.1897	52	20.1897	40	20.1897	56	20.1897	44	20.1897	25	20.1897	36	20.1897	32	20.1897	38
20.2092	29	20.2092	50	20.2092	37	20.2092	46	20.2092	23	20.2092	29	20.2092	47	20.2092	54	20.2092	56	20.2092	58	20.2092	54	20.2092	24	20.2092	59	20.2092	33	20.2092	55
20.2287	28	20.2287	47	20.2287	41	20.2287	37	20.2287	38	20.2287	37	20.2287	58	20.2287	63	20.2287	52	20.2287	54	20.2287	55	20.2287	25	20.2287	42	20.2287	47	20.2287	53
20.2482	23	20.2482	50	20.2482	37	20.2482	47	20.2482	33	20.2482	33	20.2482	54	20.2482	45	20.2482	39	20.2482	66	20.2482	44	20.2482	27	20.2482	40	20.2482	39	20.2482	41
20.2677	26	20.2677	50	20.2677	38	20.2677	40	20.2677	27	20.2677	25	20.2677	39	20.2677	66	20.2677	53	20.2677	57	20.2677	40	20.2677	23	20.2677	38	20.2677	39	20.2677	47
20.2872	39	20.2872	45	20.2872	34	20.2872	41	20.2872	25	20.2872	32	20.2872	52	20.2872	49	20.2872	48	20.2872	63	20.2872	36	20.2872	25	20.2872	30	20.2872	32	20.2872	44
20.3067	30	20.3067	42	20.3067	42	20.3067	41	20.3067	21	20.3067	30	20.3067	34	20.3067	58	20.3067	41	20.3067	54	20.3067	44	20.3067	27	20.3067	44	20.3067	44	20.3067	51
20.3262	29	20.3262	47	20.3262	47	20.3262	43	20.3262	32	20.3262	31	20.3262	48	20.3262	51	20.3262	37	20.3262	58	20.3262	60	20.3262	28	20.3262	36	20.3262	36	20.3262	44
20.3456	30	20.3456	51	20.3456	50	20.3456	33	20.3456	32	20.3456	27	20.3456	39	20.3456	68	20.3456	43	20.3456	62	20.3456	46	20.3456	23	20.3456	40	20.3456	31	20.3456	47
20.3651	31	20.3651	52	20.3651	33	20.3651	48	20.3651	21	20.3651	47	20.3651	39	20.3651	59	20.3651	51	20.3651	59	20.3651	39	20.3651	24	20.3651	31	20.3651	36	20.3651	36
20.3846	31	20.3846	38	20.3846	30	20.3846	43	20.3846	40	20.3846	30	20.3846	51	20.3846	69	20.3846	49	20.3846	48	20.3846	44	20.3846	36	20.3846	44	20.3846	46	20.3846	41
20.4041	16	20.4041	48	20.4041	40	20.4041	34	20.4041	33	20.4041	34	20.4041	40	20.4041	54	20.4041	36	20.4041	69	20.4041	48	20.4041	34	20.4041	42	20.4041	39	20.4041	50
20.4236	33	20.4236	44	20.4236	29	20.4236	48	20.4236	37	20.4236	25	20.4236	42	20.4236	45	20.4236	47	20.4236	54	20.4236	63	20.4236	24	20.4236	54	20.4236	52	20.4236	52
20.4431	24	20.4431	57	20.4431	41	20.4431	50	20.4431	30	20.4431	26	20.4431	40	20.4431	50	20.4431	43	20.4431	53	20.4431	45	20.4431	25	20.4431	36	20.4431	42	20.4431	39
20.4626	28	20.4626	53	20.4626	34	20.4626	41	20.4626	26	20.4626	35	20.4626	39	20.4626	51	20.4626	57	20.4626	55	20.4626	53	20.4626	32	20.4626	42	20.4626	30	20.4626	45
20.4821	40	20.4821	52	20.4821	33	20.4821	47	20.4821	32	20.4821	31	20.4821	41	20.4821	54	20.4821	44	20.4821	62	20.4821	42	20.4821	37	20.4821	48	20.4821	56	20.4821	45
20.5016	27	20.5016	57	20.5016	47	20.5016	53	20.5016	25	20.5016	34	20.5016	46	20.5016	56	20.5016	55	20.5016	52	20.5016	48	20.5016	27	20.5016	43	20.5016	42	20.5016	41
20.521	30	20.521	56	20.521	43	20.521	61	20.521	32	20.521	35	20.521	50	20.521	52	20.521	54	20.521	56	20.521	44	20.521	22	20.521	48	20.521	34	20.521	38
20.5405	28	20.5405	44	20.5405	45	20.5405	36	20.5405	29	20.5405	38	20.5405	44	20.5405	50	20.5405	53	20.5405	52	20.5405	42	20.5405	26	20.5405	45	20.5405	40	20.5405	51
20.56	26	20.56	43	20.56	36	20.56	56	20.56	34	20.56	45	20.56	35	20.56	50	20.56	46	20.56	50	20.56	54	20.56	31	20.56	29	20.56	34	20.56	43
20.5795	27	20.5795	57	20.5795	51	20.5795	47	20.5795	27	20.5795	26	20.5795	44	20.5795	58	20.5795	63	20.5795	60	20.5795	52	20.5795	35	20.5795	29	20.5795	41	20.5795	44
20.599	23	20.599	57	20.599	30	20.599	57	20.599	43	20.599	40	20.599	35	20.599	49	20.599	59	20.599	58	20.599	45	20.599	28	20.599	45	20.599	41	20.599	54
20.6185	27	20.6185	47	20.6185	44	20.6185	43	20.6185	29	20.6185	46	20.6185	39	20.6185	63	20.6185	69	20.6185	70	20.6185	51	20.6185	37	20.6185	41	20.6185	42	20.6185	54
20.638	30	20.638	42	20.638	40	20.638	30	20.638	27	20.638	26	20.638	49	20.638	51	20.638	54	20.638	53	20.638	54	20.638	30	20.638	47	20.638	43	20.638	51
20.6575	21	20.6575	42	20.6575	35	20.6575	44	20.6575	22	20.6575	36	20.6575	45	20.6575	50	20.6575	51	20.6575	60	20.6575	51	20.6575	32	20.6575	38	20.6575	45	20.6575	48
20.677	22	20.677	51	20.677	23	20.677	42	20.677	35	20.677	30	20.677	35	20.677	48	20.677	54	20.677	66	20.677	48	20.677	21	20.677	36	20.677	40	20.677	57
20.6965	31	20.6965	47	20.6965	37	20.6965	54	20.6965	44	20.6965	38	20.6965	46	20.6965	52	20.6965	48	20.6965	76	20.6965	45	20.6965	24	20.6965	46	20.6965	40	20.6965	44
20.7159	20	20.7159	56	20.7159	43	20.7159	47	20.7159	29	20.7159	45	20.7159	50	20.7159	48	20.7159	48	20.7159	50	20.7159	65	20.7159	30	20.7159	41	20.7159	45	20.7159	54
20.7354	19	20.7354	75	20.7354	28	20.7354	52	20.7354	31	20.7354	47	20.7354	44	20.7354	60	20.7354	48	20.7354	62	20.7354	44	20.7354	22	20.7354	49	20.7354	44	20.7354	45
20.7549	28	20.7549	58	20.7549	30	20.7549	51	20.7549	29	20.7549	35	20.7549	44	20.7549	52	20.7549	56	20.7549	57	20.7549	47	20.7549	31	20.7549	31	20.7549	45	20.7549	53
20.7744	23	20.7744	51	20.7744	41	20.7744	41	20.7744	32	20.7744	42	20.7744	41	20.7744	59	20.7744	51	20.7744	55	20.7744	42	20.7744	32	20.7744	44	20.7744	42	20.7744	32
20.7939	44	20.7939	55	20.7939	41	20.7939	51	20.7939	33	20.7939	38	20.7939	56	20.7939	51	20.7939	58	20.7939	53	20.7939	51	20.7939	29	20.7939	43	20.7939	42	20.7939	66
20.8134	29	20.8134	43	20.8134	34	20.8134	49	20.8134	33	20.8134	35	20.8134	64	20.8134	57	20.8134	48	20.8134	64	20.8134	48	20.8134	33	20.8134	46	20.8134	30	20.8134	35
20.8329	23	20.8329	54	20.8329	37	20.8329	42	20.8329	24	20.8329	26	20.8329	42	20.8329	56	20.8329	63	20.8329	52	20.8329	42	20.8329	28	20.8329	55	20.8329	41	20.8329	54
20.8524	29	20.8524	44	20.8524	33	20.8524	48	20.8524	33	20.8524	35	20.8524	47	20.8524	56	20.8524	56	20.8524	57	20.8524	57	20.8524	21	20.8524	49	20.8524	36	20.8524	60
20.8719	29	20.8719	62	20.8719	44	20.8719	50	20.8719	32	20.8719	27	20.8719	37	20.8719	67	20.8719	54	20.8719	64	20.8719	54	20.8719	27	20.8719	43	20.8719	30	20.8719	70
20.8913	25	20.8913	44	20.8913	31	20.8913	52	20.8913	31	20.8913	31	20.8913	52	20.8913	61	20.8913	55	20.8913	46	20.8913	55	20.8913	38	20.8913	52	20.8913	47	20.8913	49
20.9108	33	20.9108	55	20.9108	42	20.9108	61	20.9108	28	20.9108	39	20.9108	43	20.9108	65	20.9108	50	20.9108	53	20.9108	60	20.9108	29	20.9108	39	20.9108	40	20.9108	59
20.9303	30	20.9303	54	20.9303	44	20.9303	34	20.9303	39	20.9303	32	20.9303	41	20.9303	61	20.9303	53	20.9303	57	20.9303	50	20.9303	24	20.9303	54	20.9303	39	20.9303	47
20.9498	25	20.9498	61	20.9498	34	20.9498	50	20.9498	30	20.9498	26	20.9498	53	20.9498	44	20.9498	50	20.9498	79	20.9498	48	20.9498	22	20.9498	52	20.9498	40	20.9498	42
20.9693	23	20.9693	62	20.9693	29	20.9693	50	20.9693	34	20.9693	26	20.9693	58	20.9693	61	20.9693	45	20.9693	49	20.9693	71	20.9693	21	20.9693	39	20.9693	52	20.9693	48
20.9888	24	20.9888	51	20.9888	35	20.9888	49	20.9888	31	20.9888	40	20.9888	32	20.9888	53	20.9888	54	20.9888	66	20.9888	45	20.9888	34	20.9888	50	20.9888	38	20.9888	65
21.0083	28	21.0083	53	21.0083	28	21.0083	59	21.0083	37	21.0083	31	21.0083	47	21.0083	48	21.0083	56	21.0083	61	21.0083	48	21.0083	23	21.0083	56	21.0083	34	21.0083	58
21.0278	33	21.0278	61	21.0278	39	21.0278	48	21.0278	30	21.0278	37	21.0278	40	21.0278	45	21.0278	52	21.0278	56	21.0278	53	21.0278	30	21.0278	47	21.0278	34	21.0278	43
21.0473	26	21.0473	55	21.0473	25	21.0473	54	21.0473	34	21.0473	38	21.0473	46	21.0473	66	21.0473	60	21.0473	51	21.0473	51	21.0473	38	21.0473	55	21.0473	37	21.0473	43
21.0667	28	21.0667	46	21.0667	29	21.0667	44	21.0667	38	21.0667	40	21.0667	46	21.0667	58	21.0667	52	21.0667	66	21.0667	55	21.0667	35	21.0667	40	21.0667	38	21.0667	55
21.0862	26	21.0862	52	21.0862	38	21.0862	55	21.0862	34	21.0862	32	21.0862	47	21.0862	51	21.0862	66	21.0862	62	21.0862	43	21.0862	26	21.0862	45	21.0862	37	21.0862	54
21.1057	33	21.1057	46	21.1057	34	21.1057	50	21.1057	29	21.1057	39	21.1057	41	21.1057	69	21.1057	47	21.1057	73	21.1057	50	21.1057	27	21.1057	41	21.1057	38	21.1057	55
21.1252	34	21.1252	52	21.1252	33	21.1252	54	21.1252	39	21.1252	40	21.1252	57	21.1252	51	21.1252	51	21.1252	62	21.1252	51	21.1252	26	21.1252	45	21.1252	41	21.1252	52
21.1447	32	21.1447	64	21.1447	40	21.1447	47	21.1447	31	21.1447	41	21.1447	32	21.1447	53	21.1447	48	21.1447	54	21.1447	66	21.1447	38	21.1447	54	21.1447	33	21.1447	45
21.1642	22	21.1642	54	21.1642	37	21.1642	44	21.1642	32	21.1642	35	21.1642	51	21.1642	53	21.1642	61	21.1642	62	21.1642	62	21.1642	31	21.1642	53	21.1642	49	21.1642	42
21.1837	27	21.1837	49	21.1837	28	21.1837	48	21.1837	30	21.1837	41	21.1837	50	21.1837	47	21.1837	62	21.1837	65	21.1837	53	21.1837	29	21.1837	54	21.1837	40	21.1837	44
21.2032	25	21.2032	58	21.2032	29	21.2032	48	21.2032	24	21.2032	34	21.2032	39	21.2032	60	21.2032	45	21.2032	60	21.2032	49	21.2032	33	21.2032	59	21.2032	41	21.2032	46
21.2227	27	21.2227	61	21.2227	34	21.2227	54	21.2227	32	21.2227	38	21.2227	54	21.2227	69	21.2227	49	21.2227	50	21.2227	54	21.2227	37	21.2227	45	21.2227	47	21.2227	45
21.2422	35	21.2422	48	21.2422	36	21.2422	55	21.2422	36	21.2422	45	21.2422	54	21.2422	59	21.2422	62	21.2422	57	21.2422	51	21.2422	26	21.2422	48	21.2422	33	21.2422	41
21.2616	31	21.2616	52	21.2616	43	21.2616	43	21.2616	29	21.2616	28	21.2616	32	21.2616	66	21.2616	51	21.2616	66	21.2616	61	21.2616	37	21.2616	56	21.2616	37	21.2616	41
21.2811	28	21.2811	55	21.2811	39	21.2811	38	21.2811	28	21.2811	28	21.2811	44	21.2811	55	21.2811	63	21.2811	47	21.2811	42	21.2811	32	21.2811	56	21.2811	48	21.2811	53
21.3006	21	21.3006	55	21.3006	40	21.3006	66	21.3006	51	21.3006	43	21.3006	35	21.3006	56	21.3006	53	21.3006	63	21.3006	62	21.3006	37	21.3006	55	21.3006	60	21.3006	40
21.3201	34	21.3201	64	21.3201	41	21.3201	54	21.3201	33	21.3201	38	21.3201	54	21.3201	57	21.3201	55	21.3201	55	21.3201	55	21.3201	34	21.3201	64	21.3201	41	21.3201	46
21.3396	38	21.3396	58	21.3396	29	21.3396	47	21.3396	35	21.3396	36	21.3396	52	21.3396	74	21.3396	57	21.3396	68	21.3396	49	21.3396	33	21.3396	50	21.3396	39	21.3396	53
21.3591	30	21.3591	63	21.3591	43	21.3591	49	21.3591	41	21.3591	40	21.3591	47	21.3591	55	21.3591	55	21.3591	61	21.3591	57	21.3591	28	21.3591	54	21.3591	60	21.3591	53
21.3786	27	21.3786	62	21.3786	38	21.3786	50	21.3786	29	21.3786	41	21.3786	63	21.3786	62	21.3786	62	21.3786	62	21.3786	54	21.3786	26	21.3786	63	21.3786	52	21.3786	52
21.3981	32	21.3981	53	21.3981	33	21.3981	49	21.3981	38	21.3981	36	21.3981	47	21.3981	69	21.3981	54	21.3981	58	21.3981	57	21.3981	35	21.3981	50	21.3981	52	21.3981	57
21.4176	31	21.4176	69	21.4176	38	21.4176	39	21.4176	27	21.4176	47	21.4176	51	21.4176	69	21.4176	57	21.4176	46	21.4176	63	21.4176	28	21.4176	50	21.4176	42	21.4176	55
21.437	38	21.437	74	21.437	33	21.437	65	21.437	39	21.437	34	21.437	46	21.437	51	21.437	48	21.437	67	21.437	54	21.437	39	21.437	59	21.437	50	21.437	50
21.4565	48	21.4565	80	21.4565	41	21.4565	48	21.4565	31	21.4565	50	21.4565	50	21.4565	54	21.4565	59	21.4565	59	21.4565	48	21.4565	28	21.4565	68	21.4565	31	21.4565	55
21.476	34	21.476	60	21.476	47	21.476	48	21.476	39	21.476	37	21.476	51	21.476	61	21.476	65	21.476	62	21.476	55	21.476	28	21.476	48	21.476	44	21.476	75
21.4955	49	21.4955	60	21.4955	37	21.4955	53	21.4955	40	21.4955	51	21.4955	50	21.4955	67	21.4955	84	21.4955	66	21.4955	48	21.4955	39	21.4955	49	21.4955	51	21.4955	58
21.515	37	21.515	62	21.515	40	21.515	68	21.515	37	21.515	35	21.515	46	21.515	53	21.515	75	21.515	64	21.515	59	21.515	25	21.515	63	21.515	50	21.515	57
21.5345	32	21.5345	73	21.5345	45	21.5345	52	21.5345	46	21.5345	42	21.5345	69	21.5345	49	21.5345	67	21.5345	64	21.5345	55	21.5345	47	21.5345	57	21.5345	50	21.5345	57
21.554	39	21.554	79	21.554	46	21.554	60	21.554	44	21.554	31	21.554	53	21.554	53	21.554	61	21.554	63	21.554	62	21.554	43	21.554	51	21.554	43	21.554	45
21.5735	37	21.5735	84	21.5735	44	21.5735	63	21.5735	41	21.5735	51	21.5735	55	21.5735	60	21.5735	59	21.5735	67	21.5735	60	21.5735	49	21.5735	54	21.5735	59	21.5735	51
21.593	41	21.593	65	21.593	32	21.593	48	21.593	45	21.593	37	21.593	50	21.593	67	21.593	60	21.593	78	21.593	49	21.593	33	21.593	39	21.593	49	21.593	53
21.6125	38	21.6125	65	21.6125	42	21.6125	57	21.6125	56	21.6125	33	21.6125	54	21.6125	60	21.6125	53	21.6125	70	21.6125	57	21.6125	31	21.6125	58	21.6125	52	21.6125	50
21.6319	48	21.6319	64	21.6319	52	21.6319	63	21.6319	51	21.6319	52	21.6319	46	21.6319	62	21.6319	51	21.6319	66	21.6319	57	21.6319	51	21.6319	70	21.6319	47	21.6319	61
21.6514	45	21.6514	49	21.6514	46	21.6514	51	21.6514	41	21.6514	45	21.6514	43	21.6514	65	21.6514	64	21.6514	74	21.6514	73	21.6514	53	21.6514	59	21.6514	60	21.6514	58
21.6709	41	21.6709	77	21.6709	46	21.6709	52	21.6709	46	21.6709	57	21.6709	60	21.6709	70	21.6709	60	21.6709	85	21.6709	62	21.6709	54	21.6709	50	21.6709	72	21.6709	49
21.6904	39	21.6904	70	21.6904	48	21.6904	69	21.6904	48	21.6904	56	21.6904	55	21.6904	76	21.6904	64	21.6904	74	21.6904	74	21.6904	55	21.6904	50	21.6904	61	21.6904	62
21.7099	54	21.7099	64	21.7099	37	21.7099	61	21.7099	46	21.7099	55	21.7099	49	21.7099	57	21.7099	72	21.7099	89	21.7099	63	21.7099	59	21.7099	53	21.7099	60	21.7099	63
21.7294	46	21.7294	79	21.7294	55	21.7294	62	21.7294	46	21.7294	60	21.7294	68	21.7294	48	21.7294	64	21.7294	81	21.7294	62	21.7294	65	21.7294	68	21.7294	55	21.7294	50
21.7489	49	21.7489	55	21.7489	63	21.7489	49	21.7489	50	21.7489	47	21.7489	56	21.7489	69	21.7489	72	21.7489	73	21.7489	65	21.7489	55	21.7489	61	21.7489	51	21.7489	60
21.7684	48	21.7684	61	21.7684	62	21.7684	60	21.7684	47	21.7684	54	21.7684	44	21.7684	66	21.7684	88	21.7684	83	21.7684	81	21.7684	73	21.7684	52	21.7684	55	21.7684	66
21.7879	50	21.7879	63	21.7879	51	21.7879	45	21.7879	52	21.7879	55	21.7879	50	21.7879	63	21.7879	84	21.7879	70	21.7879	72	21.7879	70	21.7879	56	21.7879	75	21.7879	65
21.8073	47	21.8073	63	21.8073	55	21.8073	63	21.8073	44	21.8073	59	21.8073	51	21.8073	66	21.8073	73	21.8073	76	21.8073	77	21.8073	69	21.8073	76	21.8073	63	21.8073	42
21.8268	39	21.8268	65	21.8268	41	21.8268	68	21.8268	48	21.8268	56	21.8268	59	21.8268	72	21.8268	84	21.8268	63	21.8268	86	21.8268	53	21.8268	58	21.8268	64	21.8268	61
21.8463	46	21.8463	69	21.8463	56	21.8463	55	21.8463	34	21.8463	48	21.8463	64	21.8463	74	21.8463	52	21.8463	66	21.8463	68	21.8463	59	21.8463	51	21.8463	53	21.8463	59
21.8658	43	21.8658	57	21.8658	54	21.8658	60	21.8658	36	21.8658	52	21.8658	54	21.8658	73	21.8658	78	21.8658	81	21.8658	64	21.8658	56	21.8658	55	21.8658	49	21.8658	47
21.8853	45	21.8853	76	21.8853	54	21.8853	58	21.8853	40	21.8853	42	21.8853	42	21.8853	70	21.8853	69	21.8853	58	21.8853	74	21.8853	47	21.8853	52	21.8853	70	21.8853	46
21.9048	49	21.9048	62	21.9048	45	21.9048	58	21.9048	46	21.9048	57	21.9048	58	21.9048	75	21.9048	73	21.9048	80	21.9048	72	21.9048	63	21.9048	54	21.9048	54	21.9048	56
21.9243	44	21.9243	61	21.9243	67	21.9243	58	21.9243	46	21.9243	27	21.9243	52	21.9243	81	21.9243	74	21.9243	67	21.9243	60	21.9243	48	21.9243	50	21.9243	52	21.9243	63
21.9438	38	21.9438	68	21.9438	51	21.9438	81	21.9438	45	21.9438	48	21.9438	50	21.9438	63	21.9438	76	21.9438	66	21.9438	69	21.9438	54	21.9438	58	21.9438	67	21.9438	45
21.9633	45	21.9633	63	21.9633	49	21.9633	53	21.9633	49	21.9633	56	21.9633	73	21.9633	73	21.9633	64	21.9633	78	21.9633	81	21.9633	35	21.9633	55	21.9633	53	21.9633	51
21.9827	40	21.9827	63	21.9827	47	21.9827	69	21.9827	31	21.9827	56	21.9827	48	21.9827	85	21.9827	65	21.9827	68	21.9827	68	21.9827	43	21.9827	57	21.9827	66	21.9827	56
22.0022	43	22.0022	75	22.0022	56	22.0022	64	22.0022	45	22.0022	45	22.0022	72	22.0022	72	22.0022	56	22.0022	75	22.0022	69	22.0022	38	22.0022	63	22.0022	37	22.0022	52
22.0217	38	22.0217	57	22.0217	39	22.0217	51	22.0217	34	22.0217	57	22.0217	52	22.0217	66	22.0217	66	22.0217	84	22.0217	79	22.0217	39	22.0217	74	22.0217	49	22.0217	54
22.0412	47	22.0412	78	22.0412	68	22.0412	74	22.0412	43	22.0412	49	22.0412	49	22.0412	70	22.0412	53	22.0412	61	22.0412	52	22.0412	36	22.0412	53	22.0412	52	22.0412	48
22.0607	43	22.0607	60	22.0607	48	22.0607	46	22.0607	61	22.0607	51	22.0607	63	22.0607	68	22.0607	57	22.0607	73	22.0607	63	22.0607	33	22.0607	61	22.0607	52	22.0607	61
22.0802	33	22.0802	76	22.0802	50	22.0802	55	22.0802	38	22.0802	47	22.0802	50	22.0802	68	22.0802	68	22.0802	64	22.0802	76	22.0802	24	22.0802	46	22.0802	55	22.0802	56
22.0997	38	22.0997	59	22.0997	51	22.0997	57	22.0997	38	22.0997	47	22.0997	46	22.0997	58	22.0997	63	22.0997	59	22.0997	50	22.0997	31	22.0997	63	22.0997	44	22.0997	61
22.1192	37	22.1192	68	22.1192	53	22.1192	40	22.1192	38	22.1192	49	22.1192	53	22.1192	70	22.1192	63	22.1192	49	22.1192	62	22.1192	30	22.1192	51	22.1192	51	22.1192	58
22.1387	42	22.1387	69	22.1387	41	22.1387	50	22.1387	42	22.1387	51	22.1387	53	22.1387	72	22.1387	65	22.1387	48	22.1387	61	22.1387	33	22.1387	54	22.1387	54	22.1387	47
22.1582	38	22.1582	56	22.1582	41	22.1582	54	22.1582	33	22.1582	44	22.1582	58	22.1582	67	22.1582	72	22.1582	62	22.1582	73	22.1582	45	22.1582	56	22.1582	66	22.1582	64
22.1776	42	22.1776	49	22.1776	41	22.1776	61	22.1776	39	22.1776	48	22.1776	42	22.1776	54	22.1776	65	22.1776	75	22.1776	68	22.1776	40	22.1776	52	22.1776	42	22.1776	61
22.1971	44	22.1971	73	22.1971	51	22.1971	51	22.1971	34	22.1971	54	22.1971	61	22.1971	72	22.1971	68	22.1971	82	22.1971	48	22.1971	32	22.1971	43	22.1971	34	22.1971	43
22.2166	27	22.2166	64	22.2166	45	22.2166	57	22.2166	40	22.2166	47	22.2166	43	22.2166	70	22.2166	59	22.2166	72	22.2166	61	22.2166	44	22.2166	50	22.2166	50	22.2166	52
22.2361	34	22.2361	58	22.2361	55	22.2361	46	22.2361	46	22.2361	42	22.2361	54	22.2361	72	22.2361	62	22.2361	63	22.2361	51	22.2361	47	22.2361	42	22.2361	50	22.2361	48
22.2556	34	22.2556	65	22.2556	39	22.2556	50	22.2556	36	22.2556	39	22.2556	51	22.2556	68	22.2556	69	22.2556	73	22.2556	52	22.2556	38	22.2556	54	22.2556	55	22.2556	48
22.2751	37	22.2751	59	22.2751	34	22.2751	56	22.2751	40	22.2751	38	22.2751	47	22.2751	55	22.2751	68	22.2751	62	22.2751	53	22.2751	34	22.2751	51	22.2751	43	22.2751	56
22.2946	31	22.2946	85	22.2946	49	22.2946	49	22.2946	38	22.2946	30	22.2946	36	22.2946	59	22.2946	62	22.2946	57	22.2946	54	22.2946	34	22.2946	53	22.2946	36	22.2946	53
22.3141	36	22.3141	72	22.3141	47	22.3141	49	22.3141	35	22.3141	49	22.3141	60	22.3141	66	22.3141	55	22.3141	74	22.3141	64	22.3141	34	22.3141	36	22.3141	44	22.3141	46
22.3336	44	22.3336	75	22.3336	43	22.3336	45	22.3336	39	22.3336	36	22.3336	56	22.3336	59	22.3336	55	22.3336	79	22.3336	60	22.3336	38	22.3336	49	22.3336	43	22.3336	51
22.353	34	22.353	61	22.353	40	22.353	57	22.353	37	22.353	33	22.353	50	22.353	55	22.353	69	22.353	73	22.353	42	22.353	25	22.353	55	22.353	43	22.353	56
22.3725	31	22.3725	70	22.3725	32	22.3725	45	22.3725	42	22.3725	45	22.3725	53	22.3725	57	22.3725	66	22.3725	77	22.3725	57	22.3725	33	22.3725	38	22.3725	53	22.3725	64
22.392	44	22.392	61	22.392	41	22.392	47	22.392	42	22.392	50	22.392	45	22.392	59	22.392	67	22.392	69	22.392	54	22.392	42	22.392	55	22.392	55	22.392	41
22.4115	38	22.4115	63	22.4115	44	22.4115	56	22.4115	38	22.4115	49	22.4115	54	22.4115	49	22.4115	70	22.4115	71	22.4115	63	22.4115	35	22.4115	60	22.4115	51	22.4115	57
22.431	34	22.431	59	22.431	45	22.431	35	22.431	40	22.431	34	22.431	40	22.431	65	22.431	58	22.431	67	22.431	54	22.431	37	22.431	56	22.431	43	22.431	58
22.4505	38	22.4505	63	22.4505	46	22.4505	53	22.4505	33	22.4505	41	22.4505	51	22.4505	62	22.4505	60	22.4505	86	22.4505	58	22.4505	36	22.4505	55	22.4505	48	22.4505	52
22.47	31	22.47	81	22.47	56	22.47	43	22.47	41	22.47	35	22.47	62	22.47	71	22.47	65	22.47	73	22.47	58	22.47	25	22.47	47	22.47	58	22.47	32
22.4895	38	22.4895	66	22.4895	47	22.4895	56	22.4895	35	22.4895	46	22.4895	56	22.4895	80	22.4895	77	22.4895	80	22.4895	61	22.4895	36	22.4895	59	22.4895	45	22.4895	60
22.509	35	22.509	62	22.509	34	22.509	50	22.509	40	22.509	47	22.509	42	22.509	63	22.509	68	22.509	67	22.509	58	22.509	31	22.509	51	22.509	40	22.509	54
22.5285	44	22.5285	71	22.5285	39	22.5285	54	22.5285	38	22.5285	47	22.5285	45	22.5285	71	22.5285	52	22.5285	71	22.5285	63	22.5285	34	22.5285	54	22.5285	45	22.5285	36
22.548	38	22.548	64	22.548	45	22.548	65	22.548	43	22.548	38	22.548	44	22.548	50	22.548	68	22.548	80	22.548	55	22.548	38	22.548	54	22.548	45	22.548	55
22.5674	38	22.5674	71	22.5674	43	22.5674	68	22.5674	37	22.5674	47	22.5674	52	22.5674	69	22.5674	68	22.5674	74	22.5674	45	22.5674	31	22.5674	63	22.5674	55	22.5674	54
22.5869	39	22.5869	60	22.5869	33	22.5869	45	22.5869	40	22.5869	56	22.5869	65	22.5869	65	22.5869	65	22.5869	75	22.5869	68	22.5869	36	22.5869	45	22.5869	53	22.5869	45
22.6064	47	22.6064	56	22.6064	58	22.6064	51	22.6064	42	22.6064	57	22.6064	39	22.6064	68	22.6064	68	22.6064	67	22.6064	47	22.6064	35	22.6064	63	22.6064	46	22.6064	56
22.6259	39	22.6259	64	22.6259	55	22.6259	67	22.6259	50	22.6259	48	22.6259	51	22.6259	78	22.6259	67	22.6259	84	22.6259	82	22.6259	30	22.6259	48	22.6259	50	22.6259	49
22.6454	37	22.6454	62	22.6454	40	22.6454	60	22.6454	49	22.6454	45	22.6454	51	22.6454	70	22.6454	65	22.6454	59	22.6454	50	22.6454	30	22.6454	65	22.6454	49	22.6454	63
22.6649	45	22.6649	69	22.6649	30	22.6649	68	22.6649	53	22.6649	47	22.6649	59	22.6649	65	22.6649	87	22.6649	64	22.6649	67	22.6649	44	22.6649	50	22.6649	56	22.6649	58
22.6844	48	22.6844	71	22.6844	52	22.6844	67	22.6844	50	22.6844	55	22.6844	51	22.6844	72	22.6844	70	22.6844	86	22.6844	43	22.6844	40	22.6844	59	22.6844	47	22.6844	49
22.7039	32	22.7039	63	22.7039	48	22.7039	51	22.7039	51	22.7039	42	22.7039	54	22.7039	73	22.7039	65	22.7039	63	22.7039	46	22.7039	46	22.7039	58	22.7039	65	22.7039	46
22.7233	47	22.7233	77	22.7233	45	22.7233	54	22.7233	57	22.7233	47	22.7233	55	22.7233	85	22.7233	96	22.7233	79	22.7233	60	22.7233	38	22.7233	47	22.7233	62	22.7233	45
22.7428	40	22.7428	71	22.7428	36	22.7428	51	22.7428	39	22.7428	61	22.7428	47	22.7428	70	22.7428	54	22.7428	77	22.7428	52	22.7428	45	22.7428	50	22.7428	55	22.7428	48
22.7623	40	22.7623	61	22.7623	53	22.7623	50	22.7623	58	22.7623	45	22.7623	55	22.7623	70	22.7623	67	22.7623	79	22.7623	64	22.7623	52	22.7623	53	22.7623	61	22.7623	58
22.7818	41	22.7818	67	22.7818	50	22.7818	63	22.7818	49	22.7818	49	22.7818	50	22.7818	60	22.7818	88	22.7818	88	22.7818	57	22.7818	48	22.7818	58	22.7818	44	22.7818	62
22.8013	55	22.8013	71	22.8013	40	22.8013	62	22.8013	64	22.8013	53	22.8013	67	22.8013	70	22.8013	81	22.8013	69	22.8013	73	22.8013	61	22.8013	55	22.8013	52	22.8013	47
22.8208	52	22.8208	63	22.8208	53	22.8208	59	22.8208	51	22.8208	48	22.8208	67	22.8208	75	22.8208	70	22.8208	81	22.8208	74	22.8208	63	22.8208	64	22.8208	63	22.8208	54
22.8403	60	22.8403	64	22.8403	53	22.8403	87	22.8403	41	22.8403	57	22.8403	57	22.8403	76	22.8403	69	22.8403	66	22.8403	73	22.8403	63	22.8403	58	22.8403	73	22.8403	60
22.8598	60	22.8598	82	22.8598	63	22.8598	61	22.8598	46	22.8598	42	22.8598	68	22.8598	64	22.8598	66	22.8598	91	22.8598	68	22.8598	70	22.8598	79	22.8598	67	22.8598	42
22.8793	43	22.8793	73	22.8793	45	22.8793	77	22.8793	54	22.8793	45	22.8793	50	22.8793	73	22.8793	86	22.8793	71	22.8793	73	22.8793	70	22.8793	51	22.8793	59	22.8793	58
22.8988	53	22.8988	65	22.8988	52	22.8988	65	22.8988	43	22.8988	65	22.8988	52	22.8988	77	22.8988	75	22.8988	68	22.8988	66	22.8988	68	22.8988	67	22.8988	66	22.8988	66
22.9182	51	22.9182	69	22.9182	53	22.9182	65	22.9182	51	22.9182	52	22.9182	82	22.9182	82	22.9182	65	22.9182	90	22.9182	92	22.9182	74	22.9182	64	22.9182	59	22.9182	65
22.9377	39	22.9377	70	22.9377	45	22.9377	61	22.9377	52	22.9377	38	22.9377	52	22.9377	66	22.9377	70	22.9377	88	22.9377	70	22.9377	74	22.9377	55	22.9377	61	22.9377	54
22.9572	52	22.9572	66	22.9572	63	22.9572	59	22.9572	52	22.9572	50	22.9572	66	22.9572	82	22.9572	75	22.9572	62	22.9572	72	22.9572	52	22.9572	70	22.9572	60	22.9572	56
22.9767	51	22.9767	86	22.9767	54	22.9767	64	22.9767	58	22.9767	49	22.9767	61	22.9767	63	22.9767	76	22.9767	79	22.9767	62	22.9767	51	22.9767	51	22.9767	53	22.9767	57
22.9962	37	22.9962	79	22.9962	48	22.9962	75	22.9962	66	22.9962	47	22.9962	48	22.9962	68	22.9962	71	22.9962	61	22.9962	60	22.9962	56	22.9962	77	22.9962	70	22.9962	66
23.0157	47	23.0157	77	23.0157	48	23.0157	66	23.0157	58	23.0157	46	23.0157	43	23.0157	63	23.0157	69	23.0157	81	23.0157	72	23.0157	53	23.0157	58	23.0157	65	23.0157	45
23.0352	49	23.0352	77	23.0352	56	23.0352	80	23.0352	52	23.0352	47	23.0352	63	23.0352	77	23.0352	82	23.0352	63	23.0352	94	23.0352	48	23.0352	66	23.0352	48	23.0352	54
23.0547	55	23.0547	70	23.0547	49	23.0547	62	23.0547	50	23.0547	48	23.0547	69	23.0547	80	23.0547	87	23.0547	83	23.0547	64	23.0547	68	23.0547	73	23.0547	57	23.0547	53
23.0742	39	23.0742	72	23.0742	55	23.0742	80	23.0742	47	23.0742	56	23.0742	65	23.0742	61	23.0742	83	23.0742	64	23.0742	73	23.0742	35	23.0742	46	23.0742	50	23.0742	60
23.0937	50	23.0937	79	23.0937	45	23.0937	82	23.0937	47	23.0937	46	23.0937	58	23.0937	68	23.0937	71	23.0937	73	23.0937	63	23.0937	27	23.0937	60	23.0937	57	23.0937	57
23.1131	39	23.1131	79	23.1131	51	23.1131	60	23.1131	46	23.1131	48	23.1131	60	23.1131	61	23.1131	72	23.1131	77	23.1131	76	23.1131	37	23.1131	64	23.1131	61	23.1131	57
23.1326	41	23.1326	59	23.1326	52	23.1326	63	23.1326	56	23.1326	39	23.1326	58	23.1326	74	23.1326	85	23.1326	64	23.1326	56	23.1326	31	23.1326	66	23.1326	66	23.1326	66
23.1521	35	23.1521	84	23.1521	49	23.1521	53	23.1521	50	23.1521	40	23.1521	57	23.1521	82	23.1521	83	23.1521	77	23.1521	60	23.1521	29	23.1521	53	23.1521	57	23.1521	62
23.1716	46	23.1716	70	23.1716	42	23.1716	65	23.1716	55	23.1716	42	23.1716	54	23.1716	68	23.1716	63	23.1716	68	23.1716	61	23.1716	30	23.1716	58	23.1716	58	23.1716	55
23.1911	36	23.1911	72	23.1911	44	23.1911	55	23.1911	43	23.1911	40	23.1911	66	23.1911	58	23.1911	57	23.1911	67	23.1911	65	23.1911	45	23.1911	47	23.1911	57	23.1911	51
23.2106	41	23.2106	74	23.2106	47	23.2106	53	23.2106	40	23.2106	41	23.2106	41	23.2106	87	23.2106	77	23.2106	85	23.2106	56	23.2106	40	23.2106	57	23.2106	50	23.2106	49
23.2301	47	23.2301	81	23.2301	50	23.2301	60	23.2301	38	23.2301	40	23.2301	46	23.2301	64	23.2301	73	23.2301	69	23.2301	62	23.2301	36	23.2301	59	23.2301	62	23.2301	56
23.2496	46	23.2496	64	23.2496	34	23.2496	49	23.2496	36	23.2496	44	23.2496	55	23.2496	66	23.2496	72	23.2496	72	23.2496	56	23.2496	33	23.2496	67	23.2496	51	23.2496	59
23.2691	43	23.2691	67	23.2691	39	23.2691	48	23.2691	42	23.2691	46	23.2691	45	23.2691	68	23.2691	66	23.2691	81	23.2691	60	23.2691	41	23.2691	58	23.2691	50	23.2691	59
23.2885	42	23.2885	80	23.2885	52	23.2885	59	23.2885	41	23.2885	47	23.2885	42	23.2885	64	23.2885	60	23.2885	80	23.2885	71	23.2885	34	23.2885	55	23.2885	44	23.2885	67
23.308	32	23.308	67	23.308	47	23.308	52	23.308	40	23.308	52	23.308	42	23.308	64	23.308	79	23.308	67	23.308	60	23.308	28	23.308	65	23.308	58	23.308	54
23.3275	44	23.3275	64	23.3275	41	23.3275	56	23.3275	44	23.3275	34	23.3275	50	23.3275	71	23.3275	72	23.3275	78	23.3275	60	23.3275	30	23.3275	46	23.3275	57	23.3275	50
23.347	42	23.347	58	23.347	40	23.347	62	23.347	40	23.347	45	23.347	48	23.347	61	23.347	62	23.347	67	23.347	59	23.347	42	23.347	53	23.347	59	23.347	60
23.3665	17	23.3665	60	23.3665	43	23.3665	56	23.3665	31	23.3665	38	23.3665	49	23.3665	66	23.3665	59	23.3665	58	23.3665	58	23.3665	38	23.3665	45	23.3665	59	23.3665	57
23.386	38	23.386	62	23.386	42	23.386	47	23.386	46	23.386	31	23.386	46	23.386	55	23.386	60	23.386	53	23.386	57	23.386	41	23.386	52	23.386	38	23.386	65
23.4055	38	23.4055	66	23.4055	49	23.4055	59	23.4055	31	23.4055	45	23.4055	52	23.4055	71	23.4055	57	23.4055	69	23.4055	60	23.4055	22	23.4055	54	23.4055	48	23.4055	54
23.425	21	23.425	68	23.425	45	23.425	55	23.425	27	23.425	46	23.425	43	23.425	59	23.425	73	23.425	72	23.425	65	23.425	35	23.425	52	23.425	54	23.425	48
23.4445	34	23.4445	58	23.4445	35	23.4445	50	23.4445	34	23.4445	33	23.4445	53	23.4445	65	23.4445	51	23.4445	71	23.4445	69	23.4445	32	23.4445	47	23.4445	63	23.4445	61
23.464	29	23.464	49	23.464	50	23.464	52	23.464	32	23.464	38	23.464	52	23.464	70	23.464	59	23.464	54	23.464	55	23.464	39	23.464	53	23.464	58	23.464	64
23.4834	33	23.4834	66	23.4834	47	23.4834	51	23.4834	31	23.4834	50	23.4834	57	23.4834	74	23.4834	58	23.4834	65	23.4834	50	23.4834	36	23.4834	51	23.4834	48	23.4834	51
23.5029	36	23.5029	74	23.5029	35	23.5029	60	23.5029	30	23.5029	38	23.5029	60	23.5029	69	23.5029	59	23.5029	69	23.5029	72	23.5029	27	23.5029	59	23.5029	44	23.5029	44
23.5224	23	23.5224	56	23.5224	61	23.5224	64	23.5224	37	23.5224	55	23.5224	49	23.5224	70	23.5224	54	23.5224	70	23.5224	49	23.5224	27	23.5224	57	23.5224	47	23.5224	54
23.5419	33	23.5419	61	23.5419	48	23.5419	63	23.5419	40	23.5419	33	23.5419	35	23.5419	57	23.5419	56	23.5419	54	23.5419	55	23.5419	28	23.5419	46	23.5419	45	23.5419	43
23.5614	32	23.5614	76	23.5614	43	23.5614	63	23.5614	20	23.5614	45	23.5614	63	23.5614	50	23.5614	67	23.5614	59	23.5614	55	23.5614	37	23.5614	47	23.5614	44	23.5614	56
23.5809	42	23.5809	57	23.5809	45	23.5809	56	23.5809	34	23.5809	49	23.5809	60	23.5809	66	23.5809	48	23.5809	68	23.5809	64	23.5809	39	23.5809	68	23.5809	50	23.5809	45
23.6004	28	23.6004	80	23.6004	44	23.6004	59	23.6004	40	23.6004	48	23.6004	38	23.6004	73	23.6004	59	23.6004	76	23.6004	55	23.6004	26	23.6004	45	23.6004	45	23.6004	56
23.6199	33	23.6199	55	23.6199	45	23.6199	55	23.6199	34	23.6199	40	23.6199	51	23.6199	63	23.6199	63	23.6199	69	23.6199	62	23.6199	30	23.6199	57	23.6199	42	23.6199	47
23.6394	37	23.6394	71	23.6394	39	23.6394	48	23.6394	31	23.6394	44	23.6394	71	23.6394	67	23.6394	64	23.6394	77	23.6394	61	23.6394	29	23.6394	53	23.6394	39	23.6394	70
23.6588	44	23.6588	81	23.6588	39	23.6588	51	23.6588	35	23.6588	23	23.6588	55	23.6588	64	23.6588	64	23.6588	64	23.6588	54	23.6588	43	23.6588	44	23.6588	51	23.6588	45
23.6783	35	23.6783	57	23.6783	46	23.6783	45	23.6783	38	23.6783	38	23.6783	42	23.6783	63	23.6783	64	23.6783	70	23.6783	62	23.6783	48	23.6783	64	23.6783	45	23.6783	47
23.6978	22	23.6978	77	23.6978	58	23.6978	51	23.6978	40	23.6978	47	23.6978	55	23.6978	52	23.6978	55	23.6978	55	23.6978	45	23.6978	35	23.6978	63	23.6978	47	23.6978	44
23.7173	30	23.7173	66	23.7173	42	23.7173	42	23.7173	37	23.7173	40	23.7173	45	23.7173	66	23.7173	71	23.7173	73	23.7173	60	23.7173	42	23.7173	50	23.7173	56	23.7173	41
23.7368	33	23.7368	59	23.7368	41	23.7368	49	23.7368	39	23.7368	38	23.7368	49	23.7368	71	23.7368	55	23.7368	46	23.7368	62	23.7368	39	23.7368	70	23.7368	42	23.7368	52
23.7563	30	23.7563	60	23.7563	32	23.7563	63	23.7563	36	23.7563	34	23.7563	41	23.7563	81	23.7563	52	23.7563	67	23.7563	52	23.7563	33	23.7563	55	23.7563	47	23.7563	68
23.7758	32	23.7758	64	23.7758	48	23.7758	53	23.7758	27	23.7758	39	23.7758	43	23.7758	66	23.7758	72	23.7758	57	23.7758	60	23.7758	35	23.7758	55	23.7758	45	23.7758	49
23.7953	28	23.7953	64	23.7953	46	23.7953	44	23.7953	39	23.7953	49	23.7953	53	23.7953	62	23.7953	70	23.7953	62	23.7953	56	23.7953	34	23.7953	52	23.7953	56	23.7953	52
23.8148	34	23.8148	64	23.8148	35	23.8148	56	23.8148	33	23.8148	38	23.8148	50	23.8148	73	23.8148	70	23.8148	53	23.8148	52	23.8148	27	23.8148	55	23.8148	44	23.8148	62
23.8343	37	23.8343	72	23.8343	49	23.8343	49	23.8343	45	23.8343	37	23.8343	54	23.8343	59	23.8343	54	23.8343	55	23.8343	52	23.8343	31	23.8343	56	23.8343	41	23.8343	37
23.8537	27	23.8537	54	23.8537	44	23.8537	53	23.8537	33	23.8537	32	23.8537	36	23.8537	70	23.8537	66	23.8537	65	23.8537	49	23.8537	31	23.8537	61	23.8537	43	23.8537	53
23.8732	43	23.8732	63	23.8732	45	23.8732	52	23.8732	35	23.8732	48	23.8732	34	23.8732	59	23.8732	70	23.8732	74	23.8732	61	23.8732	32	23.8732	57	23.8732	50	23.8732	47
23.8927	28	23.8927	56	23.8927	52	23.8927	49	23.8927	39	23.8927	35	23.8927	47	23.8927	66	23.8927	59	23.8927	62	23.8927	63	23.8927	33	23.8927	57	23.8927	52	23.8927	52
23.9122	29	23.9122	61	23.9122	49	23.9122	42	23.9122	40	23.9122	32	23.9122	53	23.9122	72	23.9122	53	23.9122	63	23.9122	61	23.9122	26	23.9122	60	23.9122	40	23.9122	57
23.9317	25	23.9317	60	23.9317	52	23.9317	64	23.9317	23	23.9317	38	23.9317	53	23.9317	54	23.9317	52	23.9317	57	23.9317	57	23.9317	37	23.9317	64	23.9317	39	23.9317	69
23.9512	30	23.9512	65	23.9512	44	23.9512	48	23.9512	36	23.9512	40	23.9512	54	23.9512	62	23.9512	55	23.9512	81	23.9512	33	23.9512	38	23.9512	53	23.9512	44	23.9512	61
23.9707	48	23.9707	54	23.9707	43	23.9707	54	23.9707	26	23.9707	29	23.9707	46	23.9707	71	23.9707	63	23.9707	69	23.9707	55	23.9707	34	23.9707	60	23.9707	50	23.9707	49
23.9902	37	23.9902	57	23.9902	48	23.9902	49	23.9902	44	23.9902	38	23.9902	51	23.9902	61	23.9902	84	23.9902	80	23.9902	62	23.9902	33	23.9902	40	23.9902	41	23.9902	49
24.0097	32	24.0097	73	24.0097	36	24.0097	55	24.0097	32	24.0097	32	24.0097	51	24.0097	77	24.0097	49	24.0097	71	24.0097	56	24.0097	37	24.0097	66	24.0097	44	24.0097	56
24.0291	32	24.0291	67	24.0291	38	24.0291	48	24.0291	38	24.0291	32	24.0291	63	24.0291	60	24.0291	61	24.0291	66	24.0291	65	24.0291	36	24.0291	51	24.0291	52	24.0291	57
24.0486	31	24.0486	51	24.0486	48	24.0486	53	24.0486	29	24.0486	32	24.0486	59	24.0486	59	24.0486	60	24.0486	74	24.0486	61	24.0486	33	24.0486	51	24.0486	42	24.0486	60
24.0681	41	24.0681	56	24.0681	49	24.0681	40	24.0681	33	24.0681	40	24.0681	50	24.0681	72	24.0681	66	24.0681	62	24.0681	60	24.0681	36	24.0681	55	24.0681	43	24.0681	46
24.0876	27	24.0876	64	24.0876	50	24.0876	48	24.0876	41	24.0876	54	24.0876	50	24.0876	70	24.0876	58	24.0876	69	24.0876	65	24.0876	35	24.0876	57	24.0876	37	24.0876	55
24.1071	36	24.1071	78	24.1071	21	24.1071	58	24.1071	41	24.1071	39	24.1071	52	24.1071	84	24.1071	50	24.1071	86	24.1071	48	24.1071	35	24.1071	53	24.1071	42	24.1071	62
24.1266	37	24.1266	66	24.1266	37	24.1266	58	24.1266	43	24.1266	34	24.1266	47	24.1266	77	24.1266	74	24.1266	72	24.1266	61	24.1266	50	24.1266	48	24.1266	55	24.1266	53
24.1461	35	24.1461	63	24.1461	47	24.1461	47	24.1461	37	24.1461	43	24.1461	40	24.1461	73	24.1461	62	24.1461	79	24.1461	53	24.1461	42	24.1461	54	24.1461	47	24.1461	52
24.1656	35	24.1656	58	24.1656	37	24.1656	53	24.1656	31	24.1656	50	24.1656	36	24.1656	68	24.1656	58	24.1656	63	24.1656	57	24.1656	50	24.1656	45	24.1656	48	24.1656	51
24.1851	30	24.1851	61	24.1851	52	24.1851	53	24.1851	32	24.1851	29	24.1851	52	24.1851	57	24.1851	62	24.1851	79	24.1851	43	24.1851	44	24.1851	46	24.1851	56	24.1851	48
24.2046	29	24.2046	71	24.2046	43	24.2046	52	24.2046	30	24.2046	37	24.2046	51	24.2046	66	24.2046	62	24.2046	76	24.2046	68	24.2046	38	24.2046	44	24.2046	53	24.2046	50
24.224	31	24.224	75	24.224	38	24.224	45	24.224	38	24.224	24	24.224	50	24.224	74	24.224	68	24.224	68	24.224	53	24.224	43	24.224	55	24.224	46	24.224	60
24.2435	33	24.2435	60	24.2435	49	24.2435	49	24.2435	46	24.2435	45	24.2435	52	24.2435	58	24.2435	52	24.2435	58	24.2435	54	24.2435	34	24.2435	53	24.2435	48	24.2435	56
24.263	31	24.263	62	24.263	34	24.263	57	24.263	33	24.263	47	24.263	57	24.263	57	24.263	45	24.263	63	24.263	57	24.263	27	24.263	52	24.263	59	24.263	43
24.2825	38	24.2825	58	24.2825	51	24.2825	54	24.2825	40	24.2825	45	24.2825	58	24.2825	60	24.2825	60	24.2825	65	24.2825	67	24.2825	28	24.2825	59	24.2825	52	24.2825	45
24.302	36	24.302	67	24.302	36	24.302	44	24.302	29	24.302	41	24.302	57	24.302	63	24.302	68	24.302	67	24.302	62	24.302	30	24.302	69	24.302	56	24.302	56
24.3215	40	24.3215	54	24.3215	43	24.3215	50	24.3215	35	24.3215	39	24.3215	59	24.3215	75	24.3215	58	24.3215	69	24.3215	43	24.3215	32	24.3215	39	24.3215	50	24.3215	60
24.341	30	24.341	65	24.341	41	24.341	50	24.341	39	24.341	34	24.341	44	24.341	64	24.341	67	24.341	63	24.341	61	24.341	44	24.341	60	24.341	51	24.341	56
24.3605	27	24.3605	66	24.3605	44	24.3605	64	24.3605	30	24.3605	41	24.3605	50	24.3605	74	24.3605	54	24.3605	66	24.3605	67	24.3605	35	24.3605	57	24.3605	40	24.3605	47
24.38	42	24.38	66	24.38	44	24.38	51	24.38	31	24.38	41	24.38	54	24.38	64	24.38	51	24.38	59	24.38	52	24.38	43	24.38	64	24.38	50	24.38	37
24.3994	35	24.3994	65	24.3994	47	24.3994	57	24.3994	34	24.3994	42	24.3994	56	24.3994	74	24.3994	61	24.3994	65	24.3994	53	24.3994	33	24.3994	65	24.3994	44	24.3994	40
24.4189	43	24.4189	73	24.4189	45	24.4189	55	24.4189	29	24.4189	41	24.4189	50	24.4189	64	24.4189	58	24.4189	62	24.4189	59	24.4189	31	24.4189	49	24.4189	43	24.4189	54
24.4384	39	24.4384	60	24.4384	53	24.4384	59	24.4384	35	24.4384	47	24.4384	46	24.4384	70	24.4384	65	24.4384	68	24.4384	68	24.4384	27	24.4384	53	24.4384	36	24.4384	46
24.4579	28	24.4579	65	24.4579	40	24.4579	52	24.4579	34	24.4579	45	24.4579	47	24.4579	61	24.4579	58	24.4579	59	24.4579	54	24.4579	39	24.4579	62	24.4579	40	24.4579	44
24.4774	36	24.4774	57	24.4774	44	24.4774	44	24.4774	33	24.4774	41	24.4774	49	24.4774	70	24.4774	45	24.4774	71	24.4774	58	24.4774	34	24.4774	47	24.4774	49	24.4774	58
24.4969	33	24.4969	70	24.4969	38	24.4969	51	24.4969	29	24.4969	36	24.4969	55	24.4969	64	24.4969	72	24.4969	79	24.4969	60	24.4969	21	24.4969	47	24.4969	37	24.4969	41
24.5164	36	24.5164	61	24.5164	45	24.5164	55	24.5164	36	24.5164	43	24.5164	51	24.5164	58	24.5164	54	24.5164	58	24.5164	55	24.5164	24	24.5164	52	24.5164	41	24.5164	50
24.5359	30	24.5359	51	24.5359	42	24.5359	47	24.5359	33	24.5359	43	24.5359	43	24.5359	72	24.5359	50	24.5359	85	24.5359	60	24.5359	32	24.5359	50	24.5359	44	24.5359	53
24.5554	29	24.5554	77	24.5554	49	24.5554	61	24.5554	41	24.5554	48	24.5554	41	24.5554	67	24.5554	63	24.5554	75	24.5554	56	24.5554	28	24.5554	35	24.5554	44	24.5554	60
24.5748	33	24.5748	62	24.5748	36	24.5748	49	24.5748	35	24.5748	51	24.5748	57	24.5748	67	24.5748	68	24.5748	66	24.5748	58	24.5748	22	24.5748	58	24.5748	48	24.5748	58
24.5943	40	24.5943	67	24.5943	38	24.5943	35	24.5943	41	24.5943	42	24.5943	40	24.5943	64	24.5943	59	24.5943	79	24.5943	61	24.5943	27	24.5943	52	24.5943	66	24.5943	54
24.6138	50	24.6138	69	24.6138	57	24.6138	62	24.6138	33	24.6138	42	24.6138	53	24.6138	73	24.6138	68	24.6138	76	24.6138	74	24.6138	43	24.6138	62	24.6138	46	24.6138	56
24.6333	32	24.6333	72	24.6333	43	24.6333	67	24.6333	37	24.6333	37	24.6333	39	24.6333	73	24.6333	60	24.6333	66	24.6333	55	24.6333	36	24.6333	65	24.6333	39	24.6333	58
24.6528	39	24.6528	60	24.6528	43	24.6528	52	24.6528	37	24.6528	40	24.6528	52	24.6528	65	24.6528	66	24.6528	68	24.6528	53	24.6528	28	24.6528	51	24.6528	52	24.6528	58
24.6723	32	24.6723	67	24.6723	45	24.6723	63	24.6723	39	24.6723	40	24.6723	58	24.6723	60	24.6723	74	24.6723	57	24.6723	47	24.6723	32	24.6723	46	24.6723	32	24.6723	55
24.6918	32	24.6918	67	24.6918	52	24.6918	59	24.6918	33	24.6918	37	24.6918	47	24.6918	60	24.6918	55	24.6918	79	24.6918	52	24.6918	40	24.6918	43	24.6918	58	24.6918	42
24.7113	38	24.7113	64	24.7113	37	24.7113	63	24.7113	42	24.7113	38	24.7113	47	24.7113	73	24.7113	60	24.7113	60	24.7113	65	24.7113	33	24.7113	56	24.7113	46	24.7113	53
24.7308	36	24.7308	65	24.7308	38	24.7308	52	24.7308	44	24.7308	28	24.7308	54	24.7308	79	24.7308	50	24.7308	76	24.7308	61	24.7308	36	24.7308	57	24.7308	62	24.7308	48
24.7503	29	24.7503	71	24.7503	48	24.7503	49	24.7503	45	24.7503	53	24.7503	66	24.7503	67	24.7503	61	24.7503	56	24.7503	69	24.7503	37	24.7503	59	24.7503	55	24.7503	49
24.7697	39	24.7697	61	24.7697	45	24.7697	62	24.7697	41	24.7697	37	24.7697	53	24.7697	71	24.7697	58	24.7697	82	24.7697	57	24.7697	53	24.7697	58	24.7697	46	24.7697	65
24.7892	33	24.7892	74	24.7892	49	24.7892	57	24.7892	33	24.7892	43	24.7892	52	24.7892	73	24.7892	77	24.7892	61	24.7892	63	24.7892	32	24.7892	51	24.7892	55	24.7892	48
24.8087	35	24.8087	60	24.8087	42	24.8087	52	24.8087	39	24.8087	47	24.8087	66	24.8087	67	24.8087	57	24.8087	61	24.8087	55	24.8087	33	24.8087	45	24.8087	45	24.8087	71
24.8282	28	24.8282	74	24.8282	46	24.8282	61	24.8282	41	24.8282	51	24.8282	51	24.8282	64	24.8282	56	24.8282	74	24.8282	62	24.8282	40	24.8282	57	24.8282	57	24.8282	54
24.8477	38	24.8477	63	24.8477	48	24.8477	58	24.8477	31	24.8477	49	24.8477	51	24.8477	54	24.8477	68	24.8477	52	24.8477	56	24.8477	26	24.8477	55	24.8477	44	24.8477	40
24.8672	41	24.8672	57	24.8672	39	24.8672	64	24.8672	40	24.8672	43	24.8672	52	24.8672	63	24.8672	61	24.8672	67	24.8672	50	24.8672	34	24.8672	72	24.8672	43	24.8672	64
24.8867	33	24.8867	66	24.8867	38	24.8867	55	24.8867	29	24.8867	43	24.8867	57	24.8867	74	24.8867	61	24.8867	60	24.8867	67	24.8867	32	24.8867	47	24.8867	62	24.8867	46
24.9062	38	24.9062	66	24.9062	56	24.9062	68	24.9062	43	24.9062	42	24.9062	55	24.9062	55	24.9062	60	24.9062	83	24.9062	63	24.9062	35	24.9062	61	24.9062	36	24.9062	47
24.9257	32	24.9257	72	24.9257	36	24.9257	60	24.9257	34	24.9257	54	24.9257	56	24.9257	69	24.9257	74	24.9257	57	24.9257	65	24.9257	36	24.9257	50	24.9257	46	24.9257	48
24.9451	36	24.9451	65	24.9451	51	24.9451	61	24.9451	41	24.9451	45	24.9451	51	24.9451	73	24.9451	64	24.9451	89	24.9451	68	24.9451	34	24.9451	45	24.9451	61	24.9451	48
24.9646	35	24.9646	69	24.9646	43	24.9646	54	24.9646	38	24.9646	42	24.9646	52	24.9646	65	24.9646	66	24.9646	71	24.9646	65	24.9646	28	24.9646	55	24.9646	50	24.9646	63
24.9841	39	24.9841	57	24.9841	45	24.9841	62	24.9841	47	24.9841	53	24.9841	64	24.9841	69	24.9841	71	24.9841	85	24.9841	49	24.9841	38	24.9841	65	24.9841	58	24.9841	54
25.0036	25	25.0036	71	25.0036	34	25.0036	53	25.0036	45	25.0036	45	25.0036	57	25.0036	81	25.0036	60	25.0036	70	25.0036	59	25.0036	36	25.0036	66	25.0036	58	25.0036	46
25.0231	48	25.0231	64	25.0231	48	25.0231	63	25.0231	41	25.0231	38	25.0231	67	25.0231	65	25.0231	70	25.0231	65	25.0231	60	25.0231	37	25.0231	41	25.0231	58	25.0231	69
25.0426	48	25.0426	63	25.0426	55	25.0426	67	25.0426	47	25.0426	46	25.0426	69	25.0426	73	25.0426	64	25.0426	85	25.0426	46	25.0426	42	25.0426	60	25.0426	60	25.0426	49
25.0621	44	25.0621	55	25.0621	53	25.0621	75	25.0621	42	25.0621	40	25.0621	48	25.0621	65	25.0621	73	25.0621	70	25.0621	67	25.0621	30	25.0621	56	25.0621	55	25.0621	49
25.0816	28	25.0816	68	25.0816	40	25.0816	63	25.0816	28	25.0816	45	25.0816	54	25.0816	70	25.0816	71	25.0816	74	25.0816	60	25.0816	36	25.0816	49	25.0816	52	25.0816	46
25.1011	39	25.1011	83	25.1011	60	25.1011	60	25.1011	39	25.1011	54	25.1011	55	25.1011	70	25.1011	71	25.1011	66	25.1011	66	25.1011	37	25.1011	43	25.1011	53	25.1011	68
25.1206	44	25.1206	64	25.1206	61	25.1206	73	25.1206	46	25.1206	47	25.1206	61	25.1206	71	25.1206	59	25.1206	92	25.1206	68	25.1206	36	25.1206	60	25.1206	58	25.1206	56
25.14	33	25.14	70	25.14	50	25.14	64	25.14	40	25.14	54	25.14	45	25.14	76	25.14	81	25.14	68	25.14	67	25.14	47	25.14	56	25.14	43	25.14	51
25.1595	37	25.1595	78	25.1595	49	25.1595	62	25.1595	53	25.1595	52	25.1595	54	25.1595	76	25.1595	71	25.1595	73	25.1595	64	25.1595	32	25.1595	57	25.1595	44	25.1595	61
25.179	43	25.179	71	25.179	44	25.179	55	25.179	56	25.179	61	25.179	34	25.179	76	25.179	69	25.179	85	25.179	68	25.179	36	25.179	61	25.179	61	25.179	68
25.1985	30	25.1985	64	25.1985	49	25.1985	61	25.1985	38	25.1985	51	25.1985	50	25.1985	79	25.1985	61	25.1985	71	25.1985	64	25.1985	38	25.1985	57	25.1985	50	25.1985	58
25.218	34	25.218	85	25.218	57	25.218	49	25.218	37	25.218	38	25.218	46	25.218	73	25.218	59	25.218	88	25.218	69	25.218	39	25.218	63	25.218	50	25.218	51
25.2375	49	25.2375	76	25.2375	39	25.2375	66	25.2375	32	25.2375	40	25.2375	62	25.2375	61	25.2375	71	25.2375	64	25.2375	64	25.2375	41	25.2375	58	25.2375	45	25.2375	64
25.257	51	25.257	69	25.257	55	25.257	60	25.257	33	25.257	50	25.257	63	25.257	58	25.257	85	25.257	80	25.257	74	25.257	45	25.257	50	25.257	49	25.257	62
25.2765	43	25.2765	75	25.2765	72	25.2765	63	25.2765	47	25.2765	56	25.2765	57	25.2765	66	25.2765	70	25.2765	98	25.2765	54	25.2765	44	25.2765	55	25.2765	47	25.2765	49
25.296	38	25.296	68	25.296	59	25.296	61	25.296	46	25.296	42	25.296	70	25.296	70	25.296	73	25.296	76	25.296	61	25.296	53	25.296	64	25.296	61	25.296	65
25.3154	34	25.3154	65	25.3154	49	25.3154	54	25.3154	54	25.3154	46	25.3154	71	25.3154	84	25.3154	66	25.3154	57	25.3154	72	25.3154	39	25.3154	70	25.3154	51	25.3154	67
25.3349	35	25.3349	64	25.3349	62	25.3349	62	25.3349	63	25.3349	52	25.3349	64	25.3349	73	25.3349	66	25.3349	69	25.3349	81	25.3349	36	25.3349	54	25.3349	56	25.3349	55
25.3544	46	25.3544	75	25.3544	56	25.3544	57	25.3544	50	25.3544	51	25.3544	73	25.3544	70	25.3544	82	25.3544	80	25.3544	69	25.3544	48	25.3544	58	25.3544	48	25.3544	62
25.3739	47	25.3739	67	25.3739	51	25.3739	50	25.3739	43	25.3739	67	25.3739	56	25.3739	84	25.3739	68	25.3739	73	25.3739	77	25.3739	54	25.3739	64	25.3739	41	25.3739	44
25.3934	43	25.3934	87	25.3934	52	25.3934	70	25.3934	50	25.3934	55	25.3934	51	25.3934	71	25.3934	65	25.3934	84	25.3934	60	25.3934	51	25.3934	50	25.3934	55	25.3934	64
25.4129	42	25.4129	79	25.4129	58	25.4129	63	25.4129	50	25.4129	65	25.4129	55	25.4129	77	25.4129	69	25.4129	81	25.4129	43	25.4129	56	25.4129	58	25.4129	59	25.4129	66
25.4324	49	25.4324	63	25.4324	61	25.4324	63	25.4324	56	25.4324	53	25.4324	69	25.4324	66	25.4324	68	25.4324	79	25.4324	64	25.4324	50	25.4324	64	25.4324	43	25.4324	40
25.4519	45	25.4519	87	25.4519	77	25.4519	68	25.4519	57	25.4519	62	25.4519	61	25.4519	91	25.4519	68	25.4519	67	25.4519	83	25.4519	52	25.4519	65	25.4519	51	25.4519	72
25.4714	45	25.4714	71	25.4714	46	25.4714	62	25.4714	46	25.4714	63	25.4714	49	25.4714	65	25.4714	73	25.4714	81	25.4714	84	25.4714	48	25.4714	67	25.4714	66	25.4714	74
25.4908	40	25.4908	78	25.4908	67	25.4908	59	25.4908	59	25.4908	57	25.4908	66	25.4908	67	25.4908	78	25.4908	84	25.4908	76	25.4908	60	25.4908	72	25.4908	51	25.4908	73
25.5103	49	25.5103	88	25.5103	61	25.5103	65	25.5103	62	25.5103	64	25.5103	63	25.5103	84	25.5103	85	25.5103	94	25.5103	66	25.5103	39	25.5103	68	25.5103	64	25.5103	64
25.5298	47	25.5298	78	25.5298	77	25.5298	81	25.5298	51	25.5298	67	25.5298	72	25.5298	84	25.5298	78	25.5298	67	25.5298	64	25.5298	43	25.5298	64	25.5298	63	25.5298	73
25.5493	51	25.5493	90	25.5493	64	25.5493	79	25.5493	85	25.5493	68	25.5493	68	25.5493	70	25.5493	94	25.5493	98	25.5493	70	25.5493	44	25.5493	82	25.5493	81	25.5493	68
25.5688	42	25.5688	97	25.5688	69	25.5688	79	25.5688	67	25.5688	67	25.5688	59	25.5688	76	25.5688	86	25.5688	65	25.5688	76	25.5688	44	25.5688	62	25.5688	53	25.5688	78
25.5883	51	25.5883	98	25.5883	70	25.5883	76	25.5883	69	25.5883	71	25.5883	85	25.5883	83	25.5883	108	25.5883	85	25.5883	78	25.5883	41	25.5883	65	25.5883	83	25.5883	86
25.6078	48	25.6078	100	25.6078	86	25.6078	89	25.6078	64	25.6078	80	25.6078	77	25.6078	100	25.6078	112	25.6078	94	25.6078	80	25.6078	47	25.6078	73	25.6078	71	25.6078	80
25.6273	69	25.6273	110	25.6273	67	25.6273	97	25.6273	66	25.6273	83	25.6273	84	25.6273	93	25.6273	110	25.6273	99	25.6273	82	25.6273	44	25.6273	86	25.6273	70	25.6273	85
25.6468	69	25.6468	103	25.6468	78	25.6468	92	25.6468	93	25.6468	73	25.6468	81	25.6468	89	25.6468	99	25.6468	84	25.6468	96	25.6468	66	25.6468	86	25.6468	94	25.6468	94
25.6663	65	25.6663	107	25.6663	70	25.6663	106	25.6663	94	25.6663	88	25.6663	77	25.6663	103	25.6663	113	25.6663	100	25.6663	95	25.6663	39	25.6663	91	25.6663	73	25.6663	75
25.6857	82	25.6857	124	25.6857	76	25.6857	118	25.6857	97	25.6857	81	25.6857	82	25.6857	111	25.6857	128	25.6857	130	25.6857	99	25.6857	71	25.6857	78	25.6857	82	25.6857	117
25.7052	77	25.7052	126	25.7052	93	25.7052	137	25.7052	91	25.7052	107	25.7052	89	25.7052	81	25.7052	119	25.7052	106	25.7052	97	25.7052	63	25.7052	94	25.7052	99	25.7052	119
25.7247	78	25.7247	132	25.7247	85	25.7247	144	25.7247	103	25.7247	117	25.7247	82	25.7247	109	25.7247	134	25.7247	128	25.7247	117	25.7247	83	25.7247	127	25.7247	108	25.7247	110
25.7442	105	25.7442	166	25.7442	96	25.7442	165	25.7442	123	25.7442	137	25.7442	95	25.7442	117	25.7442	184	25.7442	124	25.7442	144	25.7442	88	25.7442	124	25.7442	130	25.7442	123
25.7637	113	25.7637	136	25.7637	117	25.7637	162	25.7637	168	25.7637	151	25.7637	94	25.7637	114	25.7637	155	25.7637	152	25.7637	147	25.7637	95	25.7637	118	25.7637	128	25.7637	158
25.7832	139	25.7832	176	25.7832	136	25.7832	168	25.7832	158	25.7832	157	25.7832	107	25.7832	134	25.7832	176	25.7832	190	25.7832	141	25.7832	120	25.7832	126	25.7832	136	25.7832	140
25.8027	143	25.8027	180	25.8027	142	25.8027	194	25.8027	172	25.8027	186	25.8027	116	25.8027	145	25.8027	196	25.8027	183	25.8027	136	25.8027	129	25.8027	129	25.8027	159	25.8027	171
25.8222	188	25.8222	170	25.8222	154	25.8222	198	25.8222	202	25.8222	206	25.8222	154	25.8222	148	25.8222	228	25.8222	186	25.8222	181	25.8222	161	25.8222	174	25.8222	173	25.8222	191
25.8417	202	25.8417	193	25.8417	199	25.8417	184	25.8417	206	25.8417	174	25.8417	140	25.8417	147	25.8417	235	25.8417	185	25.8417	177	25.8417	224	25.8417	152	25.8417	181	25.8417	194
25.8611	224	25.8611	201	25.8611	204	25.8611	202	25.8611	198	25.8611	175	25.8611	148	25.8611	155	25.8611	238	25.8611	214	25.8611	194	25.8611	243	25.8611	166	25.8611	213	25.8611	176
25.8806	222	25.8806	212	25.8806	202	25.8806	184	25.8806	207	25.8806	185	25.8806	133	25.8806	168	25.8806	223	25.8806	220	25.8806	206	25.8806	303	25.8806	158	25.8806	202	25.8806	193
25.9001	222	25.9001	188	25.9001	186	25.9001	198	25.9001	204	25.9001	177	25.9001	133	25.9001	169	25.9001	202	25.9001	183	25.9001	229	25.9001	287	25.9001	145	25.9001	185	25.9001	178
25.9196	240	25.9196	177	25.9196	196	25.9196	167	25.9196	218	25.9196	203	25.9196	139	25.9196	144	25.9196	187	25.9196	152	25.9196	214	25.9196	288	25.9196	150	25.9196	186	25.9196	182
25.9391	216	25.9391	154	25.9391	192	25.9391	137	25.9391	188	25.9391	169	25.9391	129	25.9391	158	25.9391	186	25.9391	142	25.9391	190	25.9391	245	25.9391	156	25.9391	180	25.9391	179
25.9586	192	25.9586	158	25.9586	188	25.9586	147	25.9586	170	25.9586	172	25.9586	127	25.9586	138	25.9586	170	25.9586	168	25.9586	183	25.9586	240	25.9586	125	25.9586	165	25.9586	173
25.9781	185	25.9781	161	25.9781	158	25.9781	117	25.9781	133	25.9781	152	25.9781	121	25.9781	129	25.9781	156	25.9781	144	25.9781	194	25.9781	175	25.9781	114	25.9781	156	25.9781	130
25.9976	146	25.9976	121	25.9976	134	25.9976	109	25.9976	131	25.9976	128	25.9976	110	25.9976	141	25.9976	127	25.9976	138	25.9976	154	25.9976	139	25.9976	119	25.9976	118	25.9976	132
26.0171	118	26.0171	136	26.0171	113	26.0171	109	26.0171	119	26.0171	120	26.0171	111	26.0171	129	26.0171	134	26.0171	102	26.0171	143	26.0171	122	26.0171	110	26.0171	112	26.0171	99
26.0365	94	26.0365	118	26.0365	101	26.0365	90	26.0365	106	26.0365	110	26.0365	98	26.0365	99	26.0365	121	26.0365	109	26.0365	141	26.0365	82	26.0365	91	26.0365	91	26.0365	115
26.056	87	26.056	104	26.056	89	26.056	81	26.056	88	26.056	98	26.056	95	26.056	106	26.056	101	26.056	88	26.056	131	26.056	81	26.056	94	26.056	101	26.056	91
26.0755	74	26.0755	122	26.0755	93	26.0755	97	26.0755	66	26.0755	92	26.0755	86	26.0755	84	26.0755	112	26.0755	93	26.0755	103	26.0755	77	26.0755	71	26.0755	97	26.0755	83
26.095	65	26.095	101	26.095	69	26.095	72	26.095	61	26.095	74	26.095	81	26.095	88	26.095	103	26.095	103	26.095	99	26.095	71	26.095	79	26.095	76	26.095	81
26.1145	89	26.1145	87	26.1145	67	26.1145	92	26.1145	61	26.1145	93	26.1145	78	26.1145	94	26.1145	95	26.1145	70	26.1145	103	26.1145	69	26.1145	73	26.1145	73	26.1145	103
26.134	63	26.134	87	26.134	70	26.134	65	26.134	66	26.134	82	26.134	67	26.134	91	26.134	107	26.134	83	26.134	96	26.134	68	26.134	86	26.134	82	26.134	79
26.1535	64	26.1535	100	26.1535	74	26.1535	82	26.1535	75	26.1535	64	26.1535	74	26.1535	81	26.1535	75	26.1535	71	26.1535	84	26.1535	53	26.1535	83	26.1535	72	26.1535	72
26.173	55	26.173	96	26.173	64	26.173	83	26.173	65	26.173	66	26.173	78	26.173	85	26.173	85	26.173	99	26.173	76	26.173	33	26.173	52	26.173	80	26.173	74
26.1925	47	26.1925	84	26.1925	47	26.1925	74	26.1925	58	26.1925	63	26.1925	67	26.1925	92	26.1925	77	26.1925	77	26.1925	93	26.1925	53	26.1925	79	26.1925	59	26.1925	69
26.212	36	26.212	81	26.212	64	26.212	57	26.212	43	26.212	70	26.212	61	26.212	95	26.212	80	26.212	68	26.212	72	26.212	42	26.212	67	26.212	80	26.212	76
26.2314	44	26.2314	69	26.2314	50	26.2314	63	26.2314	51	26.2314	68	26.2314	53	26.2314	81	26.2314	81	26.2314	69	26.2314	75	26.2314	45	26.2314	45	26.2314	54	26.2314	61
26.2509	47	26.2509	77	26.2509	60	26.2509	68	26.2509	54	26.2509	59	26.2509	57	26.2509	90	26.2509	82	26.2509	67	26.2509	71	26.2509	48	26.2509	62	26.2509	43	26.2509	60
26.2704	49	26.2704	69	26.2704	60	26.2704	78	26.2704	71	26.2704	58	26.2704	63	26.2704	84	26.2704	69	26.2704	69	26.2704	80	26.2704	46	26.2704	56	26.2704	46	26.2704	60
26.2899	40	26.2899	71	26.2899	64	26.2899	60	26.2899	53	26.2899	38	26.2899	62	26.2899	64	26.2899	73	26.2899	65	26.2899	68	26.2899	45	26.2899	46	26.2899	53	26.2899	58
26.3094	43	26.3094	71	26.3094	49	26.3094	69	26.3094	40	26.3094	43	26.3094	53	26.3094	73	26.3094	64	26.3094	70	26.3094	62	26.3094	37	26.3094	62	26.3094	59	26.3094	64
26.3289	40	26.3289	81	26.3289	52	26.3289	65	26.3289	39	26.3289	47	26.3289	63	26.3289	58	26.3289	70	26.3289	67	26.3289	68	26.3289	40	26.3289	70	26.3289	56	26.3289	56
26.3484	42	26.3484	88	26.3484	55	26.3484	61	26.3484	51	26.3484	57	26.3484	46	26.3484	69	26.3484	67	26.3484	69	26.3484	77	26.3484	39	26.3484	50	26.3484	60	26.3484	54
26.3679	39	26.3679	72	26.3679	46	26.3679	62	26.3679	54	26.3679	42	26.3679	47	26.3679	79	26.3679	69	26.3679	79	26.3679	75	26.3679	55	26.3679	60	26.3679	54	26.3679	53
26.3874	45	26.3874	80	26.3874	48	26.3874	59	26.3874	43	26.3874	64	26.3874	52	26.3874	76	26.3874	64	26.3874	70	26.3874	62	26.3874	41	26.3874	61	26.3874	54	26.3874	56
26.4068	42	26.4068	73	26.4068	57	26.4068	87	26.4068	40	26.4068	53	26.4068	66	26.4068	78	26.4068	57	26.4068	75	26.4068	55	26.4068	38	26.4068	61	26.4068	57	26.4068	70
26.4263	34	26.4263	67	26.4263	54	26.4263	83	26.4263	38	26.4263	59	26.4263	56	26.4263	72	26.4263	71	26.4263	88	26.4263	54	26.4263	36	26.4263	55	26.4263	59	26.4263	49
26.4458	41	26.4458	67	26.4458	49	26.4458	83	26.4458	49	26.4458	48	26.4458	61	26.4458	58	26.4458	67	26.4458	71	26.4458	73	26.4458	42	26.4458	62	26.4458	47	26.4458	58
26.4653	51	26.4653	65	26.4653	50	26.4653	72	26.4653	26	26.4653	41	26.4653	45	26.4653	89	26.4653	47	26.4653	96	26.4653	71	26.4653	36	26.4653	59	26.4653	54	26.4653	60
26.4848	38	26.4848	75	26.4848	40	26.4848	81	26.4848	39	26.4848	48	26.4848	62	26.4848	66	26.4848	73	26.4848	67	26.4848	68	26.4848	35	26.4848	52	26.4848	52	26.4848	60
26.5043	34	26.5043	61	26.5043	46	26.5043	66	26.5043	46	26.5043	43	26.5043	49	26.5043	74	26.5043	66	26.5043	65	26.5043	58	26.5043	36	26.5043	51	26.5043	69	26.5043	54
26.5238	39	26.5238	51	26.5238	50	26.5238	67	26.5238	50	26.5238	53	26.5238	55	26.5238	81	26.5238	69	26.5238	64	26.5238	64	26.5238	30	26.5238	64	26.5238	55	26.5238	53
26.5433	48	26.5433	63	26.5433	45	26.5433	61	26.5433	39	26.5433	43	26.5433	53	26.5433	67	26.5433	78	26.5433	86	26.5433	61	26.5433	41	26.5433	66	26.5433	54	26.5433	89
26.5628	36	26.5628	81	26.5628	52	26.5628	56	26.5628	50	26.5628	56	26.5628	44	26.5628	72	26.5628	71	26.5628	81	26.5628	68	26.5628	35	26.5628	57	26.5628	36	26.5628	89
26.5822	30	26.5822	75	26.5822	50	26.5822	66	26.5822	52	26.5822	57	26.5822	63	26.5822	79	26.5822	53	26.5822	80	26.5822	70	26.5822	36	26.5822	57	26.5822	56	26.5822	87
26.6017	41	26.6017	64	26.6017	49	26.6017	56	26.6017	68	26.6017	42	26.6017	68	26.6017	72	26.6017	76	26.6017	75	26.6017	55	26.6017	30	26.6017	60	26.6017	67	26.6017	98
26.6212	35	26.6212	64	26.6212	39	26.6212	63	26.6212	101	26.6212	53	26.6212	42	26.6212	88	26.6212	69	26.6212	83	26.6212	65	26.6212	30	26.6212	38	26.6212	70	26.6212	116
26.6407	37	26.6407	70	26.6407	55	26.6407	54	26.6407	99	26.6407	49	26.6407	58	26.6407	84	26.6407	72	26.6407	92	26.6407	54	26.6407	29	26.6407	66	26.6407	60	26.6407	140
26.6602	37	26.6602	71	26.6602	58	26.6602	66	26.6602	82	26.6602	42	26.6602	53	26.6602	73	26.6602	76	26.6602	84	26.6602	58	26.6602	42	26.6602	75	26.6602	70	26.6602	131
26.6797	46	26.6797	75	26.6797	49	26.6797	56	26.6797	74	26.6797	32	26.6797	52	26.6797	72	26.6797	74	26.6797	80	26.6797	69	26.6797	45	26.6797	81	26.6797	53	26.6797	104
26.6992	34	26.6992	66	26.6992	31	26.6992	40	26.6992	58	26.6992	29	26.6992	61	26.6992	97	26.6992	55	26.6992	76	26.6992	54	26.6992	41	26.6992	58	26.6992	48	26.6992	75
26.7187	24	26.7187	74	26.7187	46	26.7187	54	26.7187	65	26.7187	50	26.7187	59	26.7187	95	26.7187	56	26.7187	64	26.7187	51	26.7187	41	26.7187	65	26.7187	55	26.7187	106
26.7382	46	26.7382	54	26.7382	54	26.7382	63	26.7382	40	26.7382	48	26.7382	58	26.7382	84	26.7382	78	26.7382	69	26.7382	65	26.7382	39	26.7382	73	26.7382	68	26.7382	77
26.7577	28	26.7577	60	26.7577	52	26.7577	51	26.7577	44	26.7577	51	26.7577	53	26.7577	79	26.7577	59	26.7577	59	26.7577	51	26.7577	28	26.7577	60	26.7577	53	26.7577	71
26.7771	32	26.7771	69	26.7771	51	26.7771	56	26.7771	42	26.7771	45	26.7771	58	26.7771	74	26.7771	55	26.7771	71	26.7771	62	26.7771	36	26.7771	46	26.7771	52	26.7771	68
26.7966	31	26.7966	78	26.7966	34	26.7966	60	26.7966	46	26.7966	58	26.7966	56	26.7966	65	26.7966	59	26.7966	71	26.7966	63	26.7966	35	26.7966	62	26.7966	54	26.7966	63
26.8161	46	26.8161	66	26.8161	49	26.8161	41	26.8161	47	26.8161	37	26.8161	62	26.8161	71	26.8161	59	26.8161	73	26.8161	61	26.8161	41	26.8161	48	26.8161	59	26.8161	63
26.8356	45	26.8356	71	26.8356	50	26.8356	62	26.8356	46	26.8356	44	26.8356	53	26.8356	70	26.8356	53	26.8356	69	26.8356	70	26.8356	33	26.8356	68	26.8356	40	26.8356	63
26.8551	40	26.8551	53	26.8551	68	26.8551	49	26.8551	40	26.8551	34	26.8551	45	26.8551	75	26.8551	45	26.8551	72	26.8551	65	26.8551	35	26.8551	65	26.8551	61	26.8551	67
26.8746	32	26.8746	48	26.8746	56	26.8746	58	26.8746	55	26.8746	34	26.8746	66	26.8746	64	26.8746	54	26.8746	67	26.8746	61	26.8746	31	26.8746	54	26.8746	60	26.8746	37
26.8941	41	26.8941	59	26.8941	52	26.8941	56	26.8941	47	26.8941	39	26.8941	62	26.8941	51	26.8941	72	26.8941	79	26.8941	60	26.8941	33	26.8941	52	26.8941	48	26.8941	53
26.9136	35	26.9136	64	26.9136	39	26.9136	55	26.9136	49	26.9136	40	26.9136	36	26.9136	64	26.9136	69	26.9136	70	26.9136	71	26.9136	33	26.9136	73	26.9136	63	26.9136	56
26.9331	29	26.9331	55	26.9331	42	26.9331	54	26.9331	41	26.9331	30	26.9331	41	26.9331	50	26.9331	58	26.9331	67	26.9331	67	26.9331	35	26.9331	49	26.9331	42	26.9331	69
26.9525	31	26.9525	56	26.9525	41	26.9525	43	26.9525	30	26.9525	55	26.9525	54	26.9525	75	26.9525	67	26.9525	67	26.9525	62	26.9525	22	26.9525	61	26.9525	40	26.9525	48
26.972	41	26.972	62	26.972	57	26.972	60	26.972	48	26.972	50	26.972	61	26.972	67	26.972	50	26.972	63	26.972	59	26.972	37	26.972	50	26.972	49	26.972	50
26.9915	27	26.9915	63	26.9915	47	26.9915	58	26.9915	41	26.9915	60	26.9915	52	26.9915	63	26.9915	53	26.9915	69	26.9915	58	26.9915	36	26.9915	58	26.9915	58	26.9915	49
27.011	32	27.011	71	27.011	50	27.011	54	27.011	43	27.011	42	27.011	58	27.011	54	27.011	65	27.011	66	27.011	42	27.011	29	27.011	58	27.011	64	27.011	54
27.0305	37	27.0305	61	27.0305	43	27.0305	57	27.0305	47	27.0305	34	27.0305	51	27.0305	59	27.0305	57	27.0305	65	27.0305	63	27.0305	45	27.0305	54	27.0305	50	27.0305	52
27.05	24	27.05	59	27.05	56	27.05	48	27.05	37	27.05	55	27.05	32	27.05	57	27.05	48	27.05	48	27.05	53	27.05	47	27.05	61	27.05	42	27.05	46
27.0695	38	27.0695	66	27.0695	43	27.0695	45	27.0695	39	27.0695	37	27.0695	50	27.0695	64	27.0695	64	27.0695	74	27.0695	71	27.0695	40	27.0695	61	27.0695	58	27.0695	53
27.089	32	27.089	55	27.089	35	27.089	54	27.089	51	27.089	57	27.089	46	27.089	50	27.089	55	27.089	74	27.089	55	27.089	38	27.089	66	27.089	47	27.089	61
27.1085	34	27.1085	69	27.1085	52	27.1085	55	27.1085	39	27.1085	35	27.1085	55	27.1085	63	27.1085	56	27.1085	66	27.1085	68	27.1085	44	27.1085	52	27.1085	36	27.1085	79
27.1279	35	27.1279	54	27.1279	46	27.1279	65	27.1279	42	27.1279	43	27.1279	40	27.1279	64	27.1279	57	27.1279	65	27.1279	59	27.1279	49	27.1279	64	27.1279	55	27.1279	42
27.1474	34	27.1474	67	27.1474	44	27.1474	58	27.1474	32	27.1474	47	27.1474	58	27.1474	67	27.1474	69	27.1474	70	27.1474	70	27.1474	39	27.1474	61	27.1474	57	27.1474	56
27.1669	33	27.1669	67	27.1669	39	27.1669	57	27.1669	32	27.1669	38	27.1669	46	27.1669	71	27.1669	63	27.1669	63	27.1669	57	27.1669	40	27.1669	49	27.1669	42	27.1669	52
27.1864	44	27.1864	69	27.1864	54	27.1864	55	27.1864	36	27.1864	48	27.1864	51	27.1864	59	27.1864	65	27.1864	67	27.1864	64	27.1864	37	27.1864	58	27.1864	49	27.1864	75
27.2059	41	27.2059	73	27.2059	53	27.2059	52	27.2059	40	27.2059	39	27.2059	61	27.2059	66	27.2059	70	27.2059	81	27.2059	53	27.2059	31	27.2059	67	27.2059	55	27.2059	41
27.2254	39	27.2254	61	27.2254	48	27.2254	49	27.2254	46	27.2254	46	27.2254	58	27.2254	66	27.2254	67	27.2254	74	27.2254	52	27.2254	41	27.2254	47	27.2254	51	27.2254	62
27.2449	25	27.2449	74	27.2449	61	27.2449	50	27.2449	47	27.2449	52	27.2449	55	27.2449	57	27.2449	64	27.2449	68	27.2449	66	27.2449	31	27.2449	75	27.2449	43	27.2449	56
27.2644	30	27.2644	66	27.2644	60	27.2644	66	27.2644	33	27.2644	32	27.2644	50	27.2644	64	27.2644	67	27.2644	74	27.2644	52	27.2644	50	27.2644	64	27.2644	56	27.2644	57
27.2839	40	27.2839	74	27.2839	45	27.2839	66	27.2839	49	27.2839	56	27.2839	49	27.2839	58	27.2839	64	27.2839	81	27.2839	55	27.2839	38	27.2839	46	27.2839	56	27.2839	59
27.3034	35	27.3034	69	27.3034	41	27.3034	53	27.3034	33	27.3034	43	27.3034	56	27.3034	67	27.3034	72	27.3034	79	27.3034	45	27.3034	32	27.3034	63	27.3034	50	27.3034	51
27.3228	40	27.3228	58	27.3228	49	27.3228	46	27.3228	49	27.3228	41	27.3228	58	27.3228	72	27.3228	64	27.3228	67	27.3228	65	27.3228	38	27.3228	53	27.3228	56	27.3228	62
27.3423	32	27.3423	56	27.3423	46	27.3423	44	27.3423	38	27.3423	34	27.3423	50	27.3423	67	27.3423	46	27.3423	61	27.3423	56	27.3423	33	27.3423	51	27.3423	51	27.3423	65
27.3618	41	27.3618	59	27.3618	48	27.3618	45	27.3618	43	27.3618	34	27.3618	52	27.3618	70	27.3618	58	27.3618	71	27.3618	61	27.3618	32	27.3618	56	27.3618	50	27.3618	63
27.3813	41	27.3813	60	27.3813	43	27.3813	63	27.3813	34	27.3813	42	27.3813	51	27.3813	78	27.3813	63	27.3813	62	27.3813	60	27.3813	42	27.3813	62	27.3813	58	27.3813	40
27.4008	36	27.4008	66	27.4008	43	27.4008	51	27.4008	46	27.4008	39	27.4008	60	27.4008	59	27.4008	58	27.4008	60	27.4008	57	27.4008	32	27.4008	60	27.4008	39	27.4008	49
27.4203	32	27.4203	63	27.4203	43	27.4203	58	27.4203	46	27.4203	51	27.4203	59	27.4203	66	27.4203	61	27.4203	62	27.4203	57	27.4203	39	27.4203	62	27.4203	37	27.4203	61
27.4398	36	27.4398	68	27.4398	53	27.4398	52	27.4398	41	27.4398	55	27.4398	56	27.4398	61	27.4398	70	27.4398	70	27.4398	51	27.4398	34	27.4398	56	27.4398	46	27.4398	58
27.4593	32	27.4593	54	27.4593	52	27.4593	50	27.4593	43	27.4593	43	27.4593	54	27.4593	55	27.4593	64	27.4593	70	27.4593	67	27.4593	38	27.4593	55	27.4593	57	27.4593	57
27.4788	34	27.4788	64	27.4788	46	27.4788	60	27.4788	43	27.4788	27	27.4788	58	27.4788	77	27.4788	64	27.4788	74	27.4788	56	27.4788	31	27.4788	49	27.4788	48	27.4788	46
27.4982	30	27.4982	71	27.4982	40	27.4982	73	27.4982	37	27.4982	40	27.4982	48	27.4982	54	27.4982	67	27.4982	60	27.4982	64	27.4982	33	27.4982	61	27.4982	46	27.4982	59
27.5177	34	27.5177	52	27.5177	46	27.5177	56	27.5177	35	27.5177	40	27.5177	56	27.5177	72	27.5177	53	27.5177	59	27.5177	55	27.5177	30	27.5177	54	27.5177	53	27.5177	61
27.5372	34	27.5372	67	27.5372	33	27.5372	61	27.5372	33	27.5372	45	27.5372	50	27.5372	66	27.5372	63	27.5372	66	27.5372	55	27.5372	31	27.5372	49	27.5372	53	27.5372	59
27.5567	40	27.5567	70	27.5567	33	27.5567	57	27.5567	50	27.5567	50	27.5567	51	27.5567	67	27.5567	44	27.5567	63	27.5567	61	27.5567	27	27.5567	50	27.5567	54	27.5567	50
27.5762	30	27.5762	68	27.5762	46	27.5762	49	27.5762	43	27.5762	44	27.5762	54	27.5762	63	27.5762	68	27.5762	78	27.5762	50	27.5762	27	27.5762	53	27.5762	40	27.5762	63
27.5957	33	27.5957	68	27.5957	51	27.5957	57	27.5957	44	27.5957	38	27.5957	49	27.5957	80	27.5957	66	27.5957	71	27.5957	55	27.5957	37	27.5957	60	27.5957	50	27.5957	49
27.6152	32	27.6152	56	27.6152	49	27.6152	59	27.6152	34	27.6152	54	27.6152	61	27.6152	65	27.6152	65	27.6152	67	27.6152	56	27.6152	32	27.6152	56	27.6152	42	27.6152	65
27.6347	37	27.6347	53	27.6347	31	27.6347	63	27.6347	37	27.6347	37	27.6347	59	27.6347	57	27.6347	52	27.6347	70	27.6347	45	27.6347	43	27.6347	36	27.6347	55	27.6347	69
27.6542	43	27.6542	63	27.6542	38	27.6542	65	27.6542	44	27.6542	53	27.6542	54	27.6542	66	27.6542	72	27.6542	69	27.6542	71	27.6542	27	27.6542	51	27.6542	50	27.6542	71
27.6736	38	27.6736	73	27.6736	45	27.6736	45	27.6736	42	27.6736	33	27.6736	52	27.6736	69	27.6736	65	27.6736	53	27.6736	54	27.6736	38	27.6736	62	27.6736	56	27.6736	60
27.6931	36	27.6931	60	27.6931	35	27.6931	70	27.6931	37	27.6931	46	27.6931	54	27.6931	68	27.6931	76	27.6931	70	27.6931	54	27.6931	38	27.6931	52	27.6931	58	27.6931	58
27.7126	35	27.7126	68	27.7126	49	27.7126	59	27.7126	35	27.7126	41	27.7126	65	27.7126	79	27.7126	57	27.7126	58	27.7126	64	27.7126	32	27.7126	54	27.7126	33	27.7126	47
27.7321	34	27.7321	61	27.7321	43	27.7321	68	27.7321	37	27.7321	48	27.7321	57	27.7321	67	27.7321	62	27.7321	62	27.7321	67	27.7321	30	27.7321	51	27.7321	43	27.7321	47
27.7516	41	27.7516	71	27.7516	37	27.7516	46	27.7516	50	27.7516	37	27.7516	55	27.7516	59	27.7516	72	27.7516	58	27.7516	62	27.7516	44	27.7516	47	27.7516	57	27.7516	55
27.7711	50	27.7711	73	27.7711	53	27.7711	59	27.7711	37	27.7711	47	27.7711	60	27.7711	54	27.7711	57	27.7711	73	27.7711	52	27.7711	34	27.7711	61	27.7711	61	27.7711	61
27.7906	45	27.7906	84	27.7906	41	27.7906	58	27.7906	41	27.7906	29	27.7906	61	27.7906	65	27.7906	71	27.7906	77	27.7906	67	27.7906	31	27.7906	55	27.7906	57	27.7906	58
27.8101	37	27.8101	57	27.8101	43	27.8101	60	27.8101	38	27.8101	52	27.8101	46	27.8101	71	27.8101	68	27.8101	61	27.8101	68	27.8101	41	27.8101	60	27.8101	52	27.8101	61
27.8296	44	27.8296	68	27.8296	53	27.8296	61	27.8296	40	27.8296	60	27.8296	58	27.8296	56	27.8296	79	27.8296	69	27.8296	60	27.8296	49	27.8296	68	27.8296	51	27.8296	62
27.8491	34	27.8491	71	27.8491	50	27.8491	71	27.8491	50	27.8491	52	27.8491	66	27.8491	58	27.8491	69	27.8491	81	27.8491	77	27.8491	37	27.8491	60	27.8491	70	27.8491	62
27.8685	43	27.8685	80	27.8685	49	27.8685	64	27.8685	47	27.8685	48	27.8685	63	27.8685	68	27.8685	63	27.8685	69	27.8685	70	27.8685	37	27.8685	66	27.8685	58	27.8685	77
27.888	53	27.888	78	27.888	46	27.888	52	27.888	60	27.888	47	27.888	66	27.888	73	27.888	65	27.888	74	27.888	64	27.888	49	27.888	56	27.888	67	27.888	80
27.9075	51	27.9075	69	27.9075	50	27.9075	73	27.9075	57	27.9075	49	27.9075	58	27.9075	76	27.9075	67	27.9075	90	27.9075	56	27.9075	33	27.9075	73	27.9075	61	27.9075	97
27.927	56	27.927	91	27.927	54	27.927	60	27.927	60	27.927	51	27.927	53	27.927	60	27.927	72	27.927	77	27.927	57	27.927	28	27.927	71	27.927	59	27.927	125
27.9465	49	27.9465	61	27.9465	53	27.9465	67	27.9465	64	27.9465	61	27.9465	64	27.9465	81	27.9465	81	27.9465	62	27.9465	64	27.9465	55	27.9465	73	27.9465	63	27.9465	137
27.966	54	27.966	81	27.966	57	27.966	83	27.966	52	27.966	52	27.966	64	27.966	76	27.966	79	27.966	80	27.966	63	27.966	39	27.966	60	27.966	83	27.966	147
27.9855	36	27.9855	81	27.9855	54	27.9855	56	27.9855	65	27.9855	74	27.9855	62	27.9855	77	27.9855	67	27.9855	68	27.9855	62	27.9855	59	27.9855	49	27.9855	73	27.9855	86
28.005	58	28.005	80	28.005	73	28.005	54	28.005	54	28.005	75	28.005	66	28.005	85	28.005	77	28.005	87	28.005	60	28.005	67	28.005	77	28.005	88	28.005	113
28.0245	51	28.0245	73	28.0245	61	28.0245	83	28.0245	69	28.0245	71	28.0245	66	28.0245	64	28.0245	91	28.0245	95	28.0245	76	28.0245	54	28.0245	58	28.0245	59	28.0245	113
28.0439	55	28.0439	84	28.0439	56	28.0439	94	28.0439	76	28.0439	65	28.0439	59	28.0439	69	28.0439	82	28.0439	92	28.0439	70	28.0439	64	28.0439	73	28.0439	79	28.0439	92
28.0634	71	28.0634	90	28.0634	60	28.0634	94	28.0634	64	28.0634	80	28.0634	68	28.0634	87	28.0634	94	28.0634	94	28.0634	93	28.0634	70	28.0634	54	28.0634	69	28.0634	108
28.0829	62	28.0829	96	28.0829	71	28.0829	70	28.0829	83	28.0829	72	28.0829	76	28.0829	92	28.0829	66	28.0829	97	28.0829	93	28.0829	70	28.0829	74	28.0829	66	28.0829	98
28.1024	63	28.1024	101	28.1024	58	28.1024	70	28.1024	58	28.1024	71	28.1024	52	28.1024	70	28.1024	90	28.1024	94	28.1024	102	28.1024	81	28.1024	68	28.1024	91	28.1024	90
28.1219	51	28.1219	73	28.1219	64	28.1219	79	28.1219	84	28.1219	68	28.1219	71	28.1219	81	28.1219	83	28.1219	90	28.1219	95	28.1219	91	28.1219	69	28.1219	64	28.1219	87
28.1414	65	28.1414	108	28.1414	78	28.1414	78	28.1414	68	28.1414	91	28.1414	84	28.1414	77	28.1414	85	28.1414	104	28.1414	77	28.1414	89	28.1414	69	28.1414	68	28.1414	69
28.1609	55	28.1609	89	28.1609	73	28.1609	90	28.1609	72	28.1609	67	28.1609	73	28.1609	69	28.1609	78	28.1609	84	28.1609	79	28.1609	96	28.1609	64	28.1609	57	28.1609	82
28.1804	76	28.1804	105	28.1804	73	28.1804	88	28.1804	80	28.1804	58	28.1804	63	28.1804	81	28.1804	95	28.1804	97	28.1804	100	28.1804	91	28.1804	82	28.1804	55	28.1804	93
28.1999	66	28.1999	82	28.1999	74	28.1999	72	28.1999	54	28.1999	76	28.1999	98	28.1999	89	28.1999	77	28.1999	87	28.1999	89	28.1999	75	28.1999	74	28.1999	62	28.1999	70
28.2194	61	28.2194	70	28.2194	82	28.2194	84	28.2194	61	28.2194	64	28.2194	73	28.2194	97	28.2194	84	28.2194	79	28.2194	81	28.2194	80	28.2194	64	28.2194	69	28.2194	94
28.2388	52	28.2388	99	28.2388	53	28.2388	82	28.2388	57	28.2388	75	28.2388	76	28.2388	75	28.2388	87	28.2388	85	28.2388	65	28.2388	75	28.2388	69	28.2388	78	28.2388	101
28.2583	66	28.2583	89	28.2583	69	28.2583	83	28.2583	69	28.2583	84	28.2583	81	28.2583	77	28.2583	90	28.2583	82	28.2583	82	28.2583	65	28.2583	94	28.2583	71	28.2583	78
28.2778	66	28.2778	68	28.2778	81	28.2778	68	28.2778	53	28.2778	72	28.2778	68	28.2778	89	28.2778	66	28.2778	73	28.2778	85	28.2778	53	28.2778	71	28.2778	61	28.2778	62
28.2973	41	28.2973	68	28.2973	83	28.2973	69	28.2973	59	28.2973	57	28.2973	48	28.2973	68	28.2973	60	28.2973	70	28.2973	70	28.2973	66	28.2973	81	28.2973	71	28.2973	69
28.3168	67	28.3168	84	28.3168	69	28.3168	74	28.3168	68	28.3168	66	28.3168	81	28.3168	66	28.3168	94	28.3168	90	28.3168	80	28.3168	48	28.3168	66	28.3168	64	28.3168	54
28.3363	47	28.3363	78	28.3363	51	28.3363	64	28.3363	68	28.3363	66	28.3363	70	28.3363	80	28.3363	76	28.3363	74	28.3363	69	28.3363	51	28.3363	76	28.3363	67	28.3363	69
28.3558	63	28.3558	84	28.3558	56	28.3558	66	28.3558	68	28.3558	73	28.3558	69	28.3558	72	28.3558	78	28.3558	89	28.3558	84	28.3558	63	28.3558	68	28.3558	74	28.3558	73
28.3753	51	28.3753	82	28.3753	68	28.3753	83	28.3753	58	28.3753	57	28.3753	68	28.3753	67	28.3753	72	28.3753	79	28.3753	73	28.3753	51	28.3753	83	28.3753	80	28.3753	61
28.3948	42	28.3948	68	28.3948	58	28.3948	74	28.3948	60	28.3948	72	28.3948	64	28.3948	71	28.3948	80	28.3948	87	28.3948	72	28.3948	42	28.3948	78	28.3948	72	28.3948	60
28.4142	60	28.4142	83	28.4142	60	28.4142	74	28.4142	56	28.4142	57	28.4142	60	28.4142	67	28.4142	78	28.4142	84	28.4142	64	28.4142	43	28.4142	78	28.4142	73	28.4142	76
28.4337	59	28.4337	69	28.4337	64	28.4337	85	28.4337	70	28.4337	59	28.4337	62	28.4337	85	28.4337	71	28.4337	70	28.4337	71	28.4337	37	28.4337	77	28.4337	61	28.4337	68
28.4532	52	28.4532	65	28.4532	69	28.4532	83	28.4532	64	28.4532	61	28.4532	78	28.4532	77	28.4532	78	28.4532	64	28.4532	79	28.4532	42	28.4532	73	28.4532	68	28.4532	72
28.4727	54	28.4727	71	28.4727	60	28.4727	65	28.4727	41	28.4727	45	28.4727	71	28.4727	65	28.4727	81	28.4727	75	28.4727	64	28.4727	36	28.4727	57	28.4727	78	28.4727	77
28.4922	56	28.4922	81	28.4922	66	28.4922	69	28.4922	62	28.4922	58	28.4922	60	28.4922	73	28.4922	84	28.4922	73	28.4922	58	28.4922	48	28.4922	67	28.4922	74	28.4922	64
28.5117	54	28.5117	89	28.5117	76	28.5117	63	28.5117	55	28.5117	68	28.5117	66	28.5117	74	28.5117	74	28.5117	82	28.5117	71	28.5117	32	28.5117	77	28.5117	82	28.5117	74
28.5312	69	28.5312	91	28.5312	54	28.5312	75	28.5312	58	28.5312	63	28.5312	56	28.5312	72	28.5312	77	28.5312	86	28.5312	69	28.5312	53	28.5312	83	28.5312	81	28.5312	85
28.5507	53	28.5507	74	28.5507	65	28.5507	75	28.5507	58	28.5507	72	28.5507	56	28.5507	82	28.5507	72	28.5507	85	28.5507	84	28.5507	50	28.5507	68	28.5507	62	28.5507	76
28.5702	77	28.5702	81	28.5702	77	28.5702	95	28.5702	56	28.5702	64	28.5702	82	28.5702	81	28.5702	68	28.5702	84	28.5702	59	28.5702	35	28.5702	87	28.5702	54	28.5702	74
28.5897	65	28.5897	73	28.5897	61	28.5897	90	28.5897	54	28.5897	61	28.5897	62	28.5897	78	28.5897	83	28.5897	79	28.5897	75	28.5897	48	28.5897	83	28.5897	75	28.5897	74
28.6091	62	28.6091	78	28.6091	72	28.6091	78	28.6091	60	28.6091	60	28.6091	80	28.6091	74	28.6091	84	28.6091	87	28.6091	66	28.6091	40	28.6091	68	28.6091	79	28.6091	92
28.6286	58	28.6286	92	28.6286	54	28.6286	82	28.6286	48	28.6286	58	28.6286	62	28.6286	70	28.6286	85	28.6286	97	28.6286	94	28.6286	56	28.6286	85	28.6286	71	28.6286	66
28.6481	73	28.6481	79	28.6481	65	28.6481	80	28.6481	56	28.6481	61	28.6481	68	28.6481	63	28.6481	74	28.6481	80	28.6481	92	28.6481	41	28.6481	63	28.6481	78	28.6481	78
28.6676	71	28.6676	82	28.6676	61	28.6676	78	28.6676	58	28.6676	65	28.6676	58	28.6676	65	28.6676	87	28.6676	86	28.6676	76	28.6676	67	28.6676	81	28.6676	86	28.6676	80
28.6871	74	28.6871	76	28.6871	81	28.6871	101	28.6871	68	28.6871	68	28.6871	69	28.6871	76	28.6871	102	28.6871	87	28.6871	85	28.6871	53	28.6871	92	28.6871	88	28.6871	77
28.7066	67	28.7066	89	28.7066	76	28.7066	83	28.7066	68	28.7066	67	28.7066	71	28.7066	84	28.7066	85	28.7066	94	28.7066	88	28.7066	50	28.7066	72	28.7066	107	28.7066	96
28.7261	81	28.7261	92	28.7261	75	28.7261	100	28.7261	67	28.7261	66	28.7261	77	28.7261	92	28.7261	101	28.7261	101	28.7261	68	28.7261	64	28.7261	95	28.7261	90	28.7261	89
28.7456	87	28.7456	85	28.7456	72	28.7456	95	28.7456	64	28.7456	74	28.7456	91	28.7456	76	28.7456	96	28.7456	125	28.7456	83	28.7456	60	28.7456	102	28.7456	90	28.7456	81
28.7651	89	28.7651	77	28.7651	73	28.7651	91	28.7651	89	28.7651	82	28.7651	74	28.7651	89	28.7651	82	28.7651	93	28.7651	91	28.7651	70	28.7651	76	28.7651	82	28.7651	89
28.7845	80	28.7845	92	28.7845	90	28.7845	95	28.7845	89	28.7845	63	28.7845	76	28.7845	94	28.7845	102	28.7845	114	28.7845	93	28.7845	83	28.7845	81	28.7845	86	28.7845	87
28.804	95	28.804	105	28.804	79	28.804	88	28.804	74	28.804	83	28.804	95	28.804	81	28.804	109	28.804	106	28.804	97	28.804	81	28.804	96	28.804	91	28.804	109
28.8235	68	28.8235	85	28.8235	96	28.8235	83	28.8235	87	28.8235	80	28.8235	86	28.8235	90	28.8235	103	28.8235	125	28.8235	91	28.8235	93	28.8235	83	28.8235	93	28.8235	93
28.843	83	28.843	82	28.843	87	28.843	101	28.843	96	28.843	92	28.843	97	28.843	89	28.843	83	28.843	101	28.843	117	28.843	105	28.843	84	28.843	105	28.843	112
28.8625	120	28.8625	86	28.8625	97	28.8625	114	28.8625	104	28.8625	83	28.8625	77	28.8625	92	28.8625	90	28.8625	107	28.8625	93	28.8625	120	28.8625	95	28.8625	107	28.8625	105
28.882	99	28.882	101	28.882	88	28.882	106	28.882	112	28.882	84	28.882	84	28.882	80	28.882	109	28.882	111	28.882	109	28.882	137	28.882	97	28.882	96	28.882	102
28.9015	89	28.9015	91	28.9015	101	28.9015	95	28.9015	118	28.9015	89	28.9015	92	28.9015	110	28.9015	102	28.9015	99	28.9015	103	28.9015	166	28.9015	107	28.9015	103	28.9015	102
28.921	85	28.921	93	28.921	109	28.921	103	28.921	110	28.921	102	28.921	100	28.921	89	28.921	99	28.921	106	28.921	107	28.921	146	28.921	115	28.921	84	28.921	100
28.9405	108	28.9405	87	28.9405	112	28.9405	98	28.9405	100	28.9405	96	28.9405	88	28.9405	108	28.9405	102	28.9405	112	28.9405	106	28.9405	143	28.9405	96	28.9405	95	28.9405	116
28.9599	115	28.9599	91	28.9599	97	28.9599	91	28.9599	102	28.9599	100	28.9599	106	28.9599	128	28.9599	112	28.9599	104	28.9599	120	28.9599	162	28.9599	105	28.9599	113	28.9599	92
28.9794	91	28.9794	101	28.9794	100	28.9794	86	28.9794	97	28.9794	89	28.9794	81	28.9794	98	28.9794	103	28.9794	108	28.9794	106	28.9794	155	28.9794	91	28.9794	116	28.9794	93
28.9989	83	28.9989	116	28.9989	101	28.9989	91	28.9989	104	28.9989	85	28.9989	90	28.9989	92	28.9989	96	28.9989	103	28.9989	112	28.9989	144	28.9989	103	28.9989	110	28.9989	107
29.0184	102	29.0184	93	29.0184	100	29.0184	90	29.0184	96	29.0184	88	29.0184	75	29.0184	88	29.0184	80	29.0184	99	29.0184	112	29.0184	147	29.0184	79	29.0184	108	29.0184	104
29.0379	69	29.0379	96	29.0379	83	29.0379	85	29.0379	86	29.0379	98	29.0379	93	29.0379	94	29.0379	123	29.0379	125	29.0379	101	29.0379	114	29.0379	104	29.0379	108	29.0379	115
29.0574	90	29.0574	98	29.0574	103	29.0574	109	29.0574	80	29.0574	99	29.0574	84	29.0574	92	29.0574	97	29.0574	101	29.0574	110	29.0574	112	29.0574	91	29.0574	122	29.0574	84
29.0769	85	29.0769	89	29.0769	115	29.0769	118	29.0769	85	29.0769	96	29.0769	74	29.0769	92	29.0769	90	29.0769	92	29.0769	97	29.0769	75	29.0769	100	29.0769	105	29.0769	94
29.0964	93	29.0964	100	29.0964	86	29.0964	88	29.0964	84	29.0964	78	29.0964	72	29.0964	65	29.0964	100	29.0964	119	29.0964	117	29.0964	90	29.0964	115	29.0964	112	29.0964	98
29.1159	80	29.1159	95	29.1159	105	29.1159	106	29.1159	85	29.1159	79	29.1159	82	29.1159	74	29.1159	102	29.1159	94	29.1159	96	29.1159	61	29.1159	100	29.1159	93	29.1159	100
29.1354	77	29.1354	91	29.1354	95	29.1354	97	29.1354	70	29.1354	80	29.1354	89	29.1354	88	29.1354	87	29.1354	91	29.1354	84	29.1354	53	29.1354	74	29.1354	97	29.1354	98
29.1548	80	29.1548	94	29.1548	83	29.1548	86	29.1548	65	29.1548	80	29.1548	68	29.1548	94	29.1548	94	29.1548	89	29.1548	85	29.1548	67	29.1548	96	29.1548	82	29.1548	98
29.1743	76	29.1743	91	29.1743	94	29.1743	90	29.1743	75	29.1743	84	29.1743	78	29.1743	80	29.1743	120	29.1743	86	29.1743	89	29.1743	48	29.1743	77	29.1743	87	29.1743	87
29.1938	86	29.1938	82	29.1938	90	29.1938	78	29.1938	68	29.1938	90	29.1938	87	29.1938	105	29.1938	79	29.1938	81	29.1938	95	29.1938	67	29.1938	85	29.1938	91	29.1938	83
29.2133	80	29.2133	97	29.2133	86	29.2133	75	29.2133	75	29.2133	70	29.2133	78	29.2133	69	29.2133	81	29.2133	96	29.2133	69	29.2133	57	29.2133	82	29.2133	88	29.2133	79
29.2328	69	29.2328	84	29.2328	89	29.2328	66	29.2328	60	29.2328	79	29.2328	71	29.2328	84	29.2328	84	29.2328	82	29.2328	82	29.2328	47	29.2328	87	29.2328	88	29.2328	94
29.2523	79	29.2523	93	29.2523	75	29.2523	80	29.2523	72	29.2523	71	29.2523	84	29.2523	85	29.2523	93	29.2523	80	29.2523	80	29.2523	48	29.2523	95	29.2523	77	29.2523	75
29.2718	73	29.2718	92	29.2718	71	29.2718	79	29.2718	67	29.2718	70	29.2718	83	29.2718	68	29.2718	79	29.2718	91	29.2718	87	29.2718	50	29.2718	101	29.2718	92	29.2718	96
29.2913	102	29.2913	91	29.2913	86	29.2913	89	29.2913	63	29.2913	61	29.2913	70	29.2913	83	29.2913	80	29.2913	100	29.2913	72	29.2913	54	29.2913	62	29.2913	79	29.2913	72
29.3108	82	29.3108	86	29.3108	73	29.3108	83	29.3108	85	29.3108	73	29.3108	77	29.3108	70	29.3108	96	29.3108	84	29.3108	88	29.3108	41	29.3108	69	29.3108	83	29.3108	78
29.3302	64	29.3302	79	29.3302	64	29.3302	114	29.3302	66	29.3302	66	29.3302	81	29.3302	89	29.3302	94	29.3302	78	29.3302	68	29.3302	42	29.3302	89	29.3302	72	29.3302	77
29.3497	78	29.3497	64	29.3497	67	29.3497	125	29.3497	88	29.3497	60	29.3497	74	29.3497	80	29.3497	79	29.3497	69	29.3497	84	29.3497	38	29.3497	87	29.3497	74	29.3497	75
29.3692	63	29.3692	82	29.3692	63	29.3692	144	29.3692	102	29.3692	58	29.3692	63	29.3692	86	29.3692	94	29.3692	88	29.3692	77	29.3692	38	29.3692	65	29.3692	65	29.3692	73
29.3887	67	29.3887	79	29.3887	59	29.3887	158	29.3887	110	29.3887	70	29.3887	76	29.3887	97	29.3887	90	29.3887	89	29.3887	85	29.3887	36	29.3887	68	29.3887	84	29.3887	72
29.4082	115	29.4082	81	29.4082	65	29.4082	104	29.4082	105	29.4082	68	29.4082	67	29.4082	110	29.4082	82	29.4082	74	29.4082	79	29.4082	49	29.4082	76	29.4082	58	29.4082	72
29.4277	97	29.4277	76	29.4277	62	29.4277	114	29.4277	101	29.4277	55	29.4277	75	29.4277	92	29.4277	75	29.4277	72	29.4277	95	29.4277	62	29.4277	73	29.4277	68	29.4277	82
29.4472	92	29.4472	72	29.4472	59	29.4472	133	29.4472	81	29.4472	59	29.4472	75	29.4472	102	29.4472	93	29.4472	78	29.4472	76	29.4472	63	29.4472	78	29.4472	67	29.4472	64
29.4667	62	29.4667	77	29.4667	61	29.4667	111	29.4667	96	29.4667	56	29.4667	78	29.4667	104	29.4667	65	29.4667	69	29.4667	83	29.4667	35	29.4667	60	29.4667	54	29.4667	68
29.4862	77	29.4862	72	29.4862	53	29.4862	95	29.4862	72	29.4862	46	29.4862	63	29.4862	78	29.4862	75	29.4862	68	29.4862	71	29.4862	49	29.4862	63	29.4862	65	29.4862	67
29.5057	74	29.5057	79	29.5057	71	29.5057	84	29.5057	71	29.5057	67	29.5057	69	29.5057	92	29.5057	81	29.5057	65	29.5057	77	29.5057	50	29.5057	54	29.5057	60	29.5057	65
29.5252	48	29.5252	68	29.5252	58	29.5252	90	29.5252	53	29.5252	58	29.5252	69	29.5252	90	29.5252	75	29.5252	71	29.5252	73	29.5252	42	29.5252	71	29.5252	56	29.5252	63
29.5446	51	29.5446	62	29.5446	51	29.5446	73	29.5446	55	29.5446	53	29.5446	60	29.5446	75	29.5446	72	29.5446	86	29.5446	66	29.5446	45	29.5446	66	29.5446	57	29.5446	51
29.5641	58	29.5641	66	29.5641	67	29.5641	64	29.5641	53	29.5641	51	29.5641	53	29.5641	79	29.5641	64	29.5641	63	29.5641	67	29.5641	33	29.5641	57	29.5641	64	29.5641	64
29.5836	50	29.5836	78	29.5836	60	29.5836	74	29.5836	46	29.5836	42	29.5836	48	29.5836	84	29.5836	64	29.5836	49	29.5836	76	29.5836	51	29.5836	57	29.5836	79	29.5836	61
29.6031	40	29.6031	66	29.6031	55	29.6031	82	29.6031	67	29.6031	60	29.6031	53	29.6031	79	29.6031	61	29.6031	68	29.6031	61	29.6031	38	29.6031	77	29.6031	54	29.6031	65
29.6226	50	29.6226	74	29.6226	60	29.6226	64	29.6226	48	29.6226	48	29.6226	70	29.6226	70	29.6226	68	29.6226	73	29.6226	71	29.6226	28	29.6226	65	29.6226	50	29.6226	76
29.6421	50	29.6421	66	29.6421	60	29.6421	65	29.6421	45	29.6421	54	29.6421	48	29.6421	81	29.6421	52	29.6421	80	29.6421	62	29.6421	43	29.6421	77	29.6421	55	29.6421	74
29.6616	43	29.6616	72	29.6616	57	29.6616	79	29.6616	49	29.6616	53	29.6616	63	29.6616	67	29.6616	60	29.6616	60	29.6616	54	29.6616	47	29.6616	58	29.6616	64	29.6616	66
29.6811	40	29.6811	53	29.6811	47	29.6811	58	29.6811	47	29.6811	58	29.6811	60	29.6811	65	29.6811	57	29.6811	63	29.6811	63	29.6811	35	29.6811	43	29.6811	41	29.6811	58
29.7005	41	29.7005	71	29.7005	49	29.7005	64	29.7005	52	29.7005	64	29.7005	60	29.7005	71	29.7005	72	29.7005	75	29.7005	61	29.7005	46	29.7005	70	29.7005	67	29.7005	63
29.72	42	29.72	64	29.72	48	29.72	65	29.72	59	29.72	56	29.72	47	29.72	75	29.72	62	29.72	75	29.72	50	29.72	33	29.72	58	29.72	55	29.72	69
29.7395	56	29.7395	68	29.7395	69	29.7395	64	29.7395	56	29.7395	69	29.7395	49	29.7395	74	29.7395	65	29.7395	81	29.7395	70	29.7395	37	29.7395	55	29.7395	48	29.7395	55
29.759	49	29.759	59	29.759	67	29.759	68	29.759	44	29.759	57	29.759	45	29.759	54	29.759	65	29.759	92	29.759	60	29.759	35	29.759	68	29.759	58	29.759	78
29.7785	43	29.7785	62	29.7785	58	29.7785	91	29.7785	55	29.7785	44	29.7785	55	29.7785	68	29.7785	65	29.7785	55	29.7785	59	29.7785	39	29.7785	49	29.7785	45	29.7785	72
29.798	44	29.798	70	29.798	46	29.798	61	29.798	50	29.798	64	29.798	58	29.798	56	29.798	60	29.798	68	29.798	62	29.798	46	29.798	69	29.798	52	29.798	71
29.8175	29	29.8175	84	29.8175	57	29.8175	70	29.8175	38	29.8175	51	29.8175	53	29.8175	78	29.8175	61	29.8175	64	29.8175	52	29.8175	32	29.8175	67	29.8175	56	29.8175	67
29.837	56	29.837	77	29.837	45	29.837	48	29.837	47	29.837	57	29.837	59	29.837	55	29.837	61	29.837	81	29.837	59	29.837	29	29.837	58	29.837	71	29.837	65
29.8565	39	29.8565	67	29.8565	72	29.8565	71	29.8565	46	29.8565	55	29.8565	57	29.8565	86	29.8565	72	29.8565	55	29.8565	67	29.8565	40	29.8565	71	29.8565	56	29.8565	76
29.8759	40	29.8759	69	29.8759	62	29.8759	48	29.8759	54	29.8759	48	29.8759	69	29.8759	59	29.8759	59	29.8759	68	29.8759	45	29.8759	31	29.8759	56	29.8759	62	29.8759	49
29.8954	46	29.8954	82	29.8954	56	29.8954	58	29.8954	35	29.8954	45	29.8954	49	29.8954	67	29.8954	59	29.8954	73	29.8954	52	29.8954	41	29.8954	57	29.8954	54	29.8954	71
29.9149	49	29.9149	72	29.9149	70	29.9149	73	29.9149	47	29.9149	68	29.9149	46	29.9149	63	29.9149	69	29.9149	64	29.9149	61	29.9149	42	29.9149	53	29.9149	54	29.9149	61
29.9344	49	29.9344	82	29.9344	69	29.9344	64	29.9344	40	29.9344	52	29.9344	55	29.9344	66	29.9344	63	29.9344	73	29.9344	49	29.9344	48	29.9344	56	29.9344	50	29.9344	53
29.9539	48	29.9539	79	29.9539	56	29.9539	63	29.9539	49	29.9539	47	29.9539	55	29.9539	72	29.9539	57	29.9539	66	29.9539	60	29.9539	36	29.9539	66	29.9539	54	29.9539	62
29.9734	58	29.9734	61	29.9734	57	29.9734	70	29.9734	50	29.9734	54	29.9734	50	29.9734	53	29.9734	62	29.9734	72	29.9734	55	29.9734	36	29.9734	53	29.9734	52	29.9734	67
29.9929	49	29.9929	57	29.9929	60	29.9929	68	29.9929	47	29.9929	56	29.9929	53	29.9929	74	29.9929	67	29.9929	74	29.9929	59	29.9929	45	29.9929	63	29.9929	47	29.9929	59
30.0124	42	30.0124	67	30.0124	64	30.0124	50	30.0124	42	30.0124	38	30.0124	49	30.0124	56	30.0124	71	30.0124	62	30.0124	52	30.0124	40	30.0124	67	30.0124	77	30.0124	59
30.0319	41	30.0319	70	30.0319	65	30.0319	61	30.0319	47	30.0319	49	30.0319	55	30.0319	66	30.0319	57	30.0319	68	30.0319	58	30.0319	45	30.0319	60	30.0319	60	30.0319	66
30.0514	30	30.0514	71	30.0514	62	30.0514	69	30.0514	58	30.0514	49	30.0514	49	30.0514	80	30.0514	58	30.0514	87	30.0514	65	30.0514	33	30.0514	63	30.0514	73	30.0514	62
30.0709	45	30.0709	83	30.0709	80	30.0709	62	30.0709	47	30.0709	49	30.0709	60	30.0709	50	30.0709	65	30.0709	60	30.0709	56	30.0709	40	30.0709	55	30.0709	46	30.0709	65
30.0903	31	30.0903	65	30.0903	60	30.0903	71	30.0903	60	30.0903	69	30.0903	50	30.0903	78	30.0903	72	30.0903	65	30.0903	54	30.0903	53	30.0903	53	30.0903	76	30.0903	60
30.1098	42	30.1098	67	30.1098	68	30.1098	51	30.1098	40	30.1098	51	30.1098	59	30.1098	63	30.1098	56	30.1098	67	30.1098	64	30.1098	37	30.1098	65	30.1098	46	30.1098	64
30.1293	41	30.1293	53	30.1293	69	30.1293	69	30.1293	44	30.1293	46	30.1293	58	30.1293	60	30.1293	75	30.1293	69	30.1293	72	30.1293	27	30.1293	60	30.1293	62	30.1293	60
30.1488	56	30.1488	73	30.1488	69	30.1488	65	30.1488	44	30.1488	49	30.1488	57	30.1488	62	30.1488	73	30.1488	65	30.1488	51	30.1488	29	30.1488	55	30.1488	67	30.1488	71
30.1683	52	30.1683	68	30.1683	58	30.1683	67	30.1683	57	30.1683	45	30.1683	48	30.1683	55	30.1683	78	30.1683	54	30.1683	60	30.1683	41	30.1683	71	30.1683	62	30.1683	64
30.1878	39	30.1878	75	30.1878	67	30.1878	69	30.1878	38	30.1878	42	30.1878	54	30.1878	73	30.1878	69	30.1878	83	30.1878	57	30.1878	40	30.1878	65	30.1878	52	30.1878	70
30.2073	37	30.2073	58	30.2073	59	30.2073	58	30.2073	47	30.2073	41	30.2073	42	30.2073	64	30.2073	60	30.2073	66	30.2073	64	30.2073	35	30.2073	81	30.2073	52	30.2073	66
30.2268	39	30.2268	68	30.2268	59	30.2268	52	30.2268	45	30.2268	51	30.2268	40	30.2268	69	30.2268	56	30.2268	80	30.2268	62	30.2268	33	30.2268	63	30.2268	65	30.2268	67
30.2462	52	30.2462	65	30.2462	67	30.2462	61	30.2462	50	30.2462	54	30.2462	67	30.2462	63	30.2462	66	30.2462	71	30.2462	55	30.2462	36	30.2462	68	30.2462	64	30.2462	71
30.2657	38	30.2657	79	30.2657	65	30.2657	80	30.2657	54	30.2657	56	30.2657	53	30.2657	70	30.2657	70	30.2657	86	30.2657	69	30.2657	35	30.2657	79	30.2657	51	30.2657	44
30.2852	41	30.2852	64	30.2852	61	30.2852	88	30.2852	50	30.2852	45	30.2852	55	30.2852	77	30.2852	66	30.2852	59	30.2852	58	30.2852	27	30.2852	57	30.2852	65	30.2852	72
30.3047	35	30.3047	84	30.3047	46	30.3047	64	30.3047	42	30.3047	51	30.3047	48	30.3047	67	30.3047	64	30.3047	60	30.3047	59	30.3047	39	30.3047	56	30.3047	58	30.3047	63
30.3242	38	30.3242	75	30.3242	57	30.3242	79	30.3242	47	30.3242	51	30.3242	59	30.3242	55	30.3242	62	30.3242	48	30.3242	56	30.3242	48	30.3242	60	30.3242	69	30.3242	64
30.3437	41	30.3437	74	30.3437	72	30.3437	77	30.3437	46	30.3437	61	30.3437	51	30.3437	77	30.3437	49	30.3437	68	30.3437	58	30.3437	39	30.3437	47	30.3437	63	30.3437	65
30.3632	52	30.3632	56	30.3632	69	30.3632	50	30.3632	50	30.3632	57	30.3632	56	30.3632	50	30.3632	69	30.3632	80	30.3632	58	30.3632	47	30.3632	61	30.3632	66	30.3632	54
30.3827	58	30.3827	71	30.3827	73	30.3827	50	30.3827	53	30.3827	63	30.3827	52	30.3827	56	30.3827	71	30.3827	91	30.3827	65	30.3827	47	30.3827	77	30.3827	63	30.3827	62
30.4022	47	30.4022	76	30.4022	68	30.4022	71	30.4022	55	30.4022	38	30.4022	62	30.4022	59	30.4022	61	30.4022	76	30.4022	68	30.4022	43	30.4022	58	30.4022	53	30.4022	60
30.4217	46	30.4217	75	30.4217	58	30.4217	80	30.4217	52	30.4217	55	30.4217	60	30.4217	77	30.4217	58	30.4217	72	30.4217	52	30.4217	48	30.4217	56	30.4217	51	30.4217	62
30.4412	48	30.4412	83	30.4412	66	30.4412	67	30.4412	48	30.4412	41	30.4412	69	30.4412	84	30.4412	61	30.4412	68	30.4412	68	30.4412	34	30.4412	55	30.4412	62	30.4412	89
30.4606	45	30.4606	65	30.4606	64	30.4606	56	30.4606	54	30.4606	63	30.4606	56	30.4606	67	30.4606	68	30.4606	60	30.4606	43	30.4606	39	30.4606	66	30.4606	61	30.4606	78
30.4801	52	30.4801	82	30.4801	75	30.4801	75	30.4801	54	30.4801	60	30.4801	58	30.4801	84	30.4801	75	30.4801	67	30.4801	56	30.4801	39	30.4801	64	30.4801	58	30.4801	70
30.4996	52	30.4996	66	30.4996	63	30.4996	76	30.4996	49	30.4996	42	30.4996	52	30.4996	67	30.4996	84	30.4996	89	30.4996	63	30.4996	33	30.4996	57	30.4996	57	30.4996	63
30.5191	50	30.5191	73	30.5191	73	30.5191	87	30.5191	69	30.5191	48	30.5191	45	30.5191	70	30.5191	80	30.5191	82	30.5191	66	30.5191	54	30.5191	64	30.5191	69	30.5191	71
30.5386	58	30.5386	52	30.5386	72	30.5386	56	30.5386	51	30.5386	52	30.5386	68	30.5386	73	30.5386	64	30.5386	83	30.5386	71	30.5386	41	30.5386	64	30.5386	59	30.5386	65
30.5581	67	30.5581	64	30.5581	62	30.5581	56	30.5581	47	30.5581	67	30.5581	47	30.5581	62	30.5581	71	30.5581	81	30.5581	58	30.5581	51	30.5581	64	30.5581	65	30.5581	85
30.5776	39	30.5776	67	30.5776	79	30.5776	68	30.5776	59	30.5776	50	30.5776	46	30.5776	76	30.5776	80	30.5776	75	30.5776	79	30.5776	38	30.5776	57	30.5776	57	30.5776	68
30.5971	55	30.5971	83	30.5971	60	30.5971	63	30.5971	63	30.5971	57	30.5971	60	30.5971	70	30.5971	62	30.5971	74	30.5971	65	30.5971	41	30.5971	71	30.5971	60	30.5971	66
30.6166	40	30.6166	79	30.6166	54	30.6166	71	30.6166	54	30.6166	57	30.6166	70	30.6166	82	30.6166	68	30.6166	80	30.6166	66	30.6166	39	30.6166	65	30.6166	69	30.6166	48
30.636	60	30.636	66	30.636	80	30.636	71	30.636	50	30.636	46	30.636	55	30.636	75	30.636	67	30.636	82	30.636	62	30.636	26	30.636	57	30.636	70	30.636	82
30.6555	56	30.6555	82	30.6555	80	30.6555	89	30.6555	62	30.6555	58	30.6555	63	30.6555	61	30.6555	67	30.6555	79	30.6555	66	30.6555	40	30.6555	64	30.6555	65	30.6555	67
30.675	54	30.675	83	30.675	73	30.675	66	30.675	58	30.675	59	30.675	65	30.675	79	30.675	75	30.675	75	30.675	65	30.675	45	30.675	59	30.675	71	30.675	79
30.6945	51	30.6945	63	30.6945	72	30.6945	84	30.6945	56	30.6945	53	30.6945	49	30.6945	67	30.6945	75	30.6945	74	30.6945	75	30.6945	38	30.6945	76	30.6945	62	30.6945	77
30.714	68	30.714	85	30.714	67	30.714	87	30.714	52	30.714	87	30.714	51	30.714	63	30.714	63	30.714	84	30.714	64	30.714	31	30.714	81	30.714	63	30.714	84
30.7335	47	30.7335	72	30.7335	68	30.7335	82	30.7335	48	30.7335	52	30.7335	74	30.7335	73	30.7335	67	30.7335	76	30.7335	71	30.7335	39	30.7335	76	30.7335	66	30.7335	73
30.753	45	30.753	84	30.753	78	30.753	75	30.753	69	30.753	55	30.753	68	30.753	58	30.753	75	30.753	66	30.753	62	30.753	40	30.753	73	30.753	74	30.753	87
30.7725	50	30.7725	72	30.7725	73	30.7725	77	30.7725	58	30.7725	59	30.7725	51	30.7725	63	30.7725	58	30.7725	100	30.7725	68	30.7725	39	30.7725	73	30.7725	78	30.7725	72
30.792	60	30.792	80	30.792	68	30.792	81	30.792	77	30.792	58	30.792	68	30.792	79	30.792	69	30.792	94	30.792	61	30.792	48	30.792	70	30.792	78	30.792	80
30.8114	55	30.8114	79	30.8114	66	30.8114	78	30.8114	52	30.8114	68	30.8114	66	30.8114	68	30.8114	73	30.8114	87	30.8114	75	30.8114	52	30.8114	72	30.8114	75	30.8114	87
30.8309	55	30.8309	87	30.8309	81	30.8309	98	30.8309	57	30.8309	52	30.8309	65	30.8309	76	30.8309	88	30.8309	95	30.8309	61	30.8309	56	30.8309	73	30.8309	64	30.8309	86
30.8504	46	30.8504	89	30.8504	66	30.8504	80	30.8504	70	30.8504	68	30.8504	69	30.8504	70	30.8504	85	30.8504	81	30.8504	72	30.8504	43	30.8504	77	30.8504	81	30.8504	86
30.8699	64	30.8699	81	30.8699	80	30.8699	86	30.8699	63	30.8699	84	30.8699	68	30.8699	77	30.8699	73	30.8699	98	30.8699	56	30.8699	38	30.8699	83	30.8699	68	30.8699	83
30.8894	72	30.8894	80	30.8894	79	30.8894	73	30.8894	70	30.8894	78	30.8894	84	30.8894	63	30.8894	78	30.8894	90	30.8894	65	30.8894	37	30.8894	73	30.8894	87	30.8894	93
30.9089	64	30.9089	90	30.9089	78	30.9089	76	30.9089	68	30.9089	74	30.9089	96	30.9089	64	30.9089	75	30.9089	80	30.9089	69	30.9089	44	30.9089	84	30.9089	87	30.9089	77
30.9284	61	30.9284	82	30.9284	83	30.9284	89	30.9284	74	30.9284	75	30.9284	70	30.9284	77	30.9284	68	30.9284	92	30.9284	82	30.9284	49	30.9284	68	30.9284	79	30.9284	98
30.9479	52	30.9479	85	30.9479	85	30.9479	98	30.9479	64	30.9479	93	30.9479	71	30.9479	86	30.9479	92	30.9479	97	30.9479	79	30.9479	48	30.9479	78	30.9479	102	30.9479	112
30.9674	70	30.9674	97	30.9674	82	30.9674	81	30.9674	76	30.9674	85	30.9674	70	30.9674	70	30.9674	98	30.9674	94	30.9674	84	30.9674	42	30.9674	90	30.9674	81	30.9674	107
30.9869	77	30.9869	103	30.9869	79	30.9869	110	30.9869	71	30.9869	81	30.9869	75	30.9869	100	30.9869	74	30.9869	107	30.9869	84	30.9869	47	30.9869	73	30.9869	73	30.9869	98
31.0063	65	31.0063	89	31.0063	88	31.0063	98	31.0063	75	31.0063	83	31.0063	81	31.0063	81	31.0063	89	31.0063	94	31.0063	91	31.0063	58	31.0063	95	31.0063	92	31.0063	100
31.0258	57	31.0258	90	31.0258	81	31.0258	112	31.0258	66	31.0258	86	31.0258	89	31.0258	82	31.0258	92	31.0258	98	31.0258	76	31.0258	53	31.0258	95	31.0258	93	31.0258	88
31.0453	71	31.0453	99	31.0453	78	31.0453	95	31.0453	82	31.0453	85	31.0453	74	31.0453	77	31.0453	87	31.0453	93	31.0453	88	31.0453	69	31.0453	89	31.0453	90	31.0453	113
31.0648	65	31.0648	99	31.0648	76	31.0648	101	31.0648	85	31.0648	77	31.0648	67	31.0648	85	31.0648	86	31.0648	93	31.0648	91	31.0648	64	31.0648	80	31.0648	124	31.0648	127
31.0843	73	31.0843	97	31.0843	91	31.0843	120	31.0843	80	31.0843	97	31.0843	79	31.0843	87	31.0843	111	31.0843	125	31.0843	77	31.0843	70	31.0843	96	31.0843	99	31.0843	115
31.1038	87	31.1038	106	31.1038	96	31.1038	115	31.1038	93	31.1038	93	31.1038	80	31.1038	112	31.1038	100	31.1038	123	31.1038	82	31.1038	56	31.1038	107	31.1038	99	31.1038	101
31.1233	85	31.1233	92	31.1233	95	31.1233	113	31.1233	90	31.1233	107	31.1233	77	31.1233	71	31.1233	97	31.1233	111	31.1233	87	31.1233	67	31.1233	97	31.1233	105	31.1233	99
31.1428	96	31.1428	111	31.1428	79	31.1428	112	31.1428	81	31.1428	92	31.1428	90	31.1428	91	31.1428	107	31.1428	101	31.1428	87	31.1428	70	31.1428	106	31.1428	126	31.1428	115
31.1623	91	31.1623	108	31.1623	98	31.1623	113	31.1623	96	31.1623	88	31.1623	82	31.1623	102	31.1623	112	31.1623	112	31.1623	91	31.1623	53	31.1623	110	31.1623	110	31.1623	104
31.1817	103	31.1817	129	31.1817	97	31.1817	118	31.1817	107	31.1817	101	31.1817	80	31.1817	100	31.1817	88	31.1817	109	31.1817	90	31.1817	64	31.1817	125	31.1817	111	31.1817	126
31.2012	109	31.2012	125	31.2012	98	31.2012	128	31.2012	86	31.2012	103	31.2012	78	31.2012	87	31.2012	98	31.2012	132	31.2012	85	31.2012	61	31.2012	117	31.2012	127	31.2012	130
31.2207	114	31.2207	145	31.2207	95	31.2207	137	31.2207	103	31.2207	113	31.2207	93	31.2207	118	31.2207	114	31.2207	144	31.2207	107	31.2207	70	31.2207	101	31.2207	151	31.2207	125
31.2402	97	31.2402	112	31.2402	105	31.2402	145	31.2402	96	31.2402	103	31.2402	101	31.2402	109	31.2402	100	31.2402	120	31.2402	100	31.2402	80	31.2402	124	31.2402	135	31.2402	141
31.2597	137	31.2597	141	31.2597	116	31.2597	149	31.2597	128	31.2597	116	31.2597	104	31.2597	116	31.2597	114	31.2597	134	31.2597	105	31.2597	88	31.2597	122	31.2597	128	31.2597	171
31.2792	110	31.2792	129	31.2792	94	31.2792	168	31.2792	128	31.2792	129	31.2792	96	31.2792	107	31.2792	125	31.2792	147	31.2792	96	31.2792	71	31.2792	131	31.2792	153	31.2792	125
31.2987	141	31.2987	153	31.2987	106	31.2987	163	31.2987	123	31.2987	123	31.2987	104	31.2987	116	31.2987	123	31.2987	144	31.2987	126	31.2987	73	31.2987	136	31.2987	109	31.2987	134
31.3182	119	31.3182	135	31.3182	120	31.3182	172	31.3182	139	31.3182	122	31.3182	121	31.3182	83	31.3182	119	31.3182	150	31.3182	127	31.3182	97	31.3182	135	31.3182	127	31.3182	162
31.3377	143	31.3377	169	31.3377	117	31.3377	160	31.3377	164	31.3377	156	31.3377	111	31.3377	108	31.3377	155	31.3377	147	31.3377	116	31.3377	71	31.3377	171	31.3377	158	31.3377	139
31.3572	163	31.3572	155	31.3572	118	31.3572	185	31.3572	151	31.3572	129	31.3572	116	31.3572	115	31.3572	163	31.3572	167	31.3572	119	31.3572	73	31.3572	157	31.3572	154	31.3572	150
31.3766	148	31.3766	142	31.3766	136	31.3766	184	31.3766	145	31.3766	166	31.3766	154	31.3766	121	31.3766	153	31.3766	167	31.3766	135	31.3766	74	31.3766	171	31.3766	160	31.3766	187
31.3961	165	31.3961	160	31.3961	158	31.3961	202	31.3961	156	31.3961	169	31.3961	126	31.3961	135	31.3961	150	31.3961	161	31.3961	120	31.3961	94	31.3961	163	31.3961	186	31.3961	182
31.4156	184	31.4156	184	31.4156	147	31.4156	207	31.4156	176	31.4156	182	31.4156	123	31.4156	139	31.4156	182	31.4156	190	31.4156	119	31.4156	91	31.4156	183	31.4156	192	31.4156	179
31.4351	222	31.4351	196	31.4351	146	31.4351	234	31.4351	174	31.4351	182	31.4351	138	31.4351	143	31.4351	173	31.4351	183	31.4351	141	31.4351	85	31.4351	168	31.4351	178	31.4351	176
31.4546	217	31.4546	196	31.4546	161	31.4546	220	31.4546	205	31.4546	197	31.4546	137	31.4546	143	31.4546	190	31.4546	228	31.4546	158	31.4546	117	31.4546	207	31.4546	235	31.4546	193
31.4741	217	31.4741	193	31.4741	165	31.4741	223	31.4741	213	31.4741	207	31.4741	170	31.4741	155	31.4741	224	31.4741	209	31.4741	174	31.4741	133	31.4741	195	31.4741	223	31.4741	231
31.4936	215	31.4936	190	31.4936	199	31.4936	254	31.4936	228	31.4936	195	31.4936	170	31.4936	171	31.4936	195	31.4936	209	31.4936	161	31.4936	112	31.4936	182	31.4936	196	31.4936	234
31.5131	260	31.5131	213	31.5131	175	31.5131	238	31.5131	249	31.5131	222	31.5131	167	31.5131	170	31.5131	241	31.5131	210	31.5131	181	31.5131	157	31.5131	205	31.5131	223	31.5131	236
31.5326	257	31.5326	219	31.5326	196	31.5326	252	31.5326	284	31.5326	251	31.5326	151	31.5326	212	31.5326	232	31.5326	224	31.5326	209	31.5326	166	31.5326	235	31.5326	242	31.5326	275
31.552	250	31.552	229	31.552	206	31.552	248	31.552	287	31.552	222	31.552	170	31.552	180	31.552	255	31.552	266	31.552	227	31.552	188	31.552	230	31.552	277	31.552	263
31.5715	291	31.5715	216	31.5715	208	31.5715	279	31.5715	319	31.5715	243	31.5715	198	31.5715	196	31.5715	255	31.5715	227	31.5715	213	31.5715	172	31.5715	260	31.5715	277	31.5715	270
31.591	343	31.591	243	31.591	227	31.591	270	31.591	314	31.591	288	31.591	202	31.591	188	31.591	271	31.591	274	31.591	243	31.591	200	31.591	267	31.591	265	31.591	285
31.6105	336	31.6105	291	31.6105	278	31.6105	309	31.6105	380	31.6105	275	31.6105	216	31.6105	200	31.6105	263	31.6105	280	31.6105	269	31.6105	246	31.6105	293	31.6105	282	31.6105	314
31.63	350	31.63	262	31.63	287	31.63	311	31.63	341	31.63	310	31.63	179	31.63	224	31.63	343	31.63	256	31.63	270	31.63	300	31.63	291	31.63	298	31.63	288
31.6495	370	31.6495	279	31.6495	301	31.6495	329	31.6495	375	31.6495	301	31.6495	231	31.6495	213	31.6495	326	31.6495	302	31.6495	283	31.6495	349	31.6495	282	31.6495	320	31.6495	308
31.669	385	31.669	292	31.669	278	31.669	361	31.669	401	31.669	310	31.669	232	31.669	222	31.669	322	31.669	329	31.669	328	31.669	411	31.669	304	31.669	358	31.669	351
31.6885	417	31.6885	298	31.6885	295	31.6885	372	31.6885	420	31.6885	318	31.6885	276	31.6885	259	31.6885	320	31.6885	345	31.6885	347	31.6885	475	31.6885	303	31.6885	366	31.6885	375
31.708	428	31.708	278	31.708	323	31.708	386	31.708	410	31.708	369	31.708	248	31.708	260	31.708	346	31.708	360	31.708	352	31.708	520	31.708	345	31.708	383	31.708	351
31.7275	428	31.7275	288	31.7275	357	31.7275	346	31.7275	411	31.7275	356	31.7275	263	31.7275	248	31.7275	358	31.7275	384	31.7275	335	31.7275	641	31.7275	359	31.7275	402	31.7275	384
31.7469	460	31.7469	320	31.7469	363	31.7469	401	31.7469	460	31.7469	403	31.7469	277	31.7469	243	31.7469	371	31.7469	379	31.7469	363	31.7469	740	31.7469	372	31.7469	396	31.7469	371
31.7664	430	31.7664	347	31.7664	404	31.7664	365	31.7664	458	31.7664	393	31.7664	272	31.7664	275	31.7664	395	31.7664	375	31.7664	389	31.7664	784	31.7664	334	31.7664	416	31.7664	369
31.7859	420	31.7859	344	31.7859	364	31.7859	379	31.7859	433	31.7859	399	31.7859	306	31.7859	288	31.7859	393	31.7859	398	31.7859	413	31.7859	794	31.7859	309	31.7859	420	31.7859	385
31.8054	455	31.8054	359	31.8054	410	31.8054	393	31.8054	442	31.8054	424	31.8054	319	31.8054	300	31.8054	412	31.8054	396	31.8054	387	31.8054	827	31.8054	363	31.8054	445	31.8054	391
31.8249	418	31.8249	303	31.8249	379	31.8249	417	31.8249	421	31.8249	422	31.8249	283	31.8249	323	31.8249	420	31.8249	353	31.8249	418	31.8249	729	31.8249	365	31.8249	382	31.8249	374
31.8444	410	31.8444	353	31.8444	454	31.8444	363	31.8444	399	31.8444	428	31.8444	300	31.8444	336	31.8444	406	31.8444	387	31.8444	416	31.8444	705	31.8444	341	31.8444	408	31.8444	409
31.8639	436	31.8639	337	31.8639	420	31.8639	372	31.8639	447	31.8639	426	31.8639	269	31.8639	293	31.8639	395	31.8639	392	31.8639	425	31.8639	691	31.8639	327	31.8639	401	31.8639	386
31.8834	399	31.8834	337	31.8834	420	31.8834	370	31.8834	413	31.8834	427	31.8834	292	31.8834	309	31.8834	406	31.8834	330	31.8834	394	31.8834	558	31.8834	330	31.8834	388	31.8834	393
31.9029	436	31.9029	328	31.9029	390	31.9029	373	31.9029	441	31.9029	382	31.9029	281	31.9029	339	31.9029	393	31.9029	356	31.9029	437	31.9029	498	31.9029	306	31.9029	382	31.9029	372
31.9223	371	31.9223	363	31.9223	392	31.9223	359	31.9223	385	31.9223	357	31.9223	271	31.9223	306	31.9223	387	31.9223	355	31.9223	428	31.9223	445	31.9223	338	31.9223	454	31.9223	388
31.9418	373	31.9418	349	31.9418	422	31.9418	354	31.9418	378	31.9418	387	31.9418	284	31.9418	309	31.9418	407	31.9418	322	31.9418	381	31.9418	347	31.9418	324	31.9418	412	31.9418	387
31.9613	341	31.9613	330	31.9613	385	31.9613	329	31.9613	368	31.9613	387	31.9613	308	31.9613	324	31.9613	379	31.9613	361	31.9613	372	31.9613	359	31.9613	324	31.9613	401	31.9613	365
31.9808	364	31.9808	330	31.9808	378	31.9808	342	31.9808	358	31.9808	361	31.9808	298	31.9808	316	31.9808	394	31.9808	302	31.9808	358	31.9808	259	31.9808	295	31.9808	387	31.9808	347
32.0003	353	32.0003	333	32.0003	395	32.0003	338	32.0003	355	32.0003	420	32.0003	293	32.0003	306	32.0003	408	32.0003	334	32.0003	345	32.0003	275	32.0003	328	32.0003	378	32.0003	344
32.0198	387	32.0198	346	32.0198	409	32.0198	336	32.0198	345	32.0198	384	32.0198	312	32.0198	291	32.0198	380	32.0198	314	32.0198	315	32.0198	241	32.0198	307	32.0198	366	32.0198	362
32.0393	377	32.0393	315	32.0393	390	32.0393	347	32.0393	371	32.0393	348	32.0393	262	32.0393	308	32.0393	372	32.0393	310	32.0393	326	32.0393	258	32.0393	286	32.0393	327	32.0393	381
32.0588	357	32.0588	338	32.0588	340	32.0588	345	32.0588	360	32.0588	361	32.0588	244	32.0588	297	32.0588	353	32.0588	330	32.0588	322	32.0588	246	32.0588	323	32.0588	348	32.0588	347
32.0782	355	32.0782	327	32.0782	345	32.0782	377	32.0782	333	32.0782	365	32.0782	268	32.0782	290	32.0782	371	32.0782	363	32.0782	312	32.0782	263	32.0782	288	32.0782	357	32.0782	330
32.0977	366	32.0977	299	32.0977	335	32.0977	318	32.0977	363	32.0977	345	32.0977	273	32.0977	292	32.0977	343	32.0977	291	32.0977	346	32.0977	300	32.0977	311	32.0977	359	32.0977	328
32.1172	387	32.1172	310	32.1172	330	32.1172	365	32.1172	332	32.1172	337	32.1172	270	32.1172	243	32.1172	350	32.1172	313	32.1172	342	32.1172	295	32.1172	262	32.1172	348	32.1172	362
32.1367	366	32.1367	321	32.1367	300	32.1367	297	32.1367	389	32.1367	366	32.1367	259	32.1367	263	32.1367	383	32.1367	335	32.1367	306	32.1367	346	32.1367	291	32.1367	355	32.1367	354
32.1562	348	32.1562	293	32.1562	353	32.1562	369	32.1562	370	32.1562	338	32.1562	231	32.1562	259	32.1562	347	32.1562	335	32.1562	289	32.1562	363	32.1562	301	32.1562	382	32.1562	347
32.1757	345	32.1757	326	32.1757	349	32.1757	329	32.1757	375	32.1757	336	32.1757	260	32.1757	264	32.1757	336	32.1757	333	32.1757	332	32.1757	421	32.1757	292	32.1757	383	32.1757	375
32.1952	311	32.1952	325	32.1952	342	32.1952	342	32.1952	337	32.1952	352	32.1952	261	32.1952	289	32.1952	376	32.1952	346	32.1952	316	32.1952	431	32.1952	290	32.1952	347	32.1952	337
32.2147	351	32.2147	288	32.2147	312	32.2147	331	32.2147	313	32.2147	343	32.2147	244	32.2147	263	32.2147	289	32.2147	289	32.2147	314	32.2147	421	32.2147	297	32.2147	316	32.2147	370
32.2342	345	32.2342	324	32.2342	349	32.2342	303	32.2342	304	32.2342	296	32.2342	247	32.2342	237	32.2342	316	32.2342	298	32.2342	284	32.2342	406	32.2342	278	32.2342	324	32.2342	320
32.2537	329	32.2537	279	32.2537	309	32.2537	294	32.2537	309	32.2537	341	32.2537	242	32.2537	269	32.2537	316	32.2537	287	32.2537	243	32.2537	370	32.2537	263	32.2537	298	32.2537	317
32.2732	322	32.2732	262	32.2732	331	32.2732	318	32.2732	256	32.2732	289	32.2732	191	32.2732	241	32.2732	275	32.2732	281	32.2732	286	32.2732	337	32.2732	280	32.2732	308	32.2732	330
32.2926	290	32.2926	258	32.2926	295	32.2926	284	32.2926	300	32.2926	274	32.2926	220	32.2926	250	32.2926	288	32.2926	253	32.2926	276	32.2926	343	32.2926	235	32.2926	280	32.2926	280
32.3121	265	32.3121	260	32.3121	280	32.3121	255	32.3121	271	32.3121	300	32.3121	233	32.3121	227	32.3121	268	32.3121	283	32.3121	266	32.3121	273	32.3121	213	32.3121	278	32.3121	278
32.3316	279	32.3316	259	32.3316	261	32.3316	266	32.3316	265	32.3316	286	32.3316	184	32.3316	227	32.3316	229	32.3316	195	32.3316	253	32.3316	210	32.3316	244	32.3316	262	32.3316	272
32.3511	238	32.3511	235	32.3511	244	32.3511	226	32.3511	220	32.3511	260	32.3511	208	32.3511	205	32.3511	254	32.3511	229	32.3511	225	32.3511	208	32.3511	244	32.3511	270	32.3511	235
32.3706	262	32.3706	240	32.3706	247	32.3706	252	32.3706	226	32.3706	250	32.3706	182	32.3706	242	32.3706	220	32.3706	192	32.3706	240	32.3706	172	32.3706	228	32.3706	240	32.3706	243
32.3901	244	32.3901	218	32.3901	217	32.3901	254	32.3901	199	32.3901	225	32.3901	198	32.3901	184	32.3901	249	32.3901	219	32.3901	215	32.3901	144	32.3901	191	32.3901	236	32.3901	237
32.4096	232	32.4096	227	32.4096	226	32.4096	245	32.4096	199	32.4096	205	32.4096	180	32.4096	188	32.4096	198	32.4096	204	32.4096	177	32.4096	140	32.4096	191	32.4096	237	32.4096	235
32.4291	210	32.4291	196	32.4291	204	32.4291	215	32.4291	203	32.4291	212	32.4291	173	32.4291	186	32.4291	199	32.4291	189	32.4291	166	32.4291	135	32.4291	198	32.4291	208	32.4291	225
32.4485	212	32.4485	169	32.4485	165	32.4485	203	32.4485	197	32.4485	194	32.4485	174	32.4485	179	32.4485	182	32.4485	188	32.4485	209	32.4485	118	32.4485	183	32.4485	228	32.4485	220
32.468	189	32.468	192	32.468	189	32.468	210	32.468	207	32.468	214	32.468	169	32.468	185	32.468	186	32.468	216	32.468	184	32.468	89	32.468	208	32.468	201	32.468	181
32.4875	200	32.4875	192	32.4875	160	32.4875	197	32.4875	191	32.4875	176	32.4875	175	32.4875	183	32.4875	177	32.4875	204	32.4875	168	32.4875	105	32.4875	197	32.4875	185	32.4875	229
32.507	180	32.507	197	32.507	170	32.507	188	32.507	196	32.507	193	32.507	154	32.507	155	32.507	211	32.507	191	32.507	140	32.507	104	32.507	213	32.507	189	32.507	195
32.5265	183	32.5265	197	32.5265	158	32.5265	193	32.5265	183	32.5265	186	32.5265	178	32.5265	147	32.5265	184	32.5265	184	32.5265	155	32.5265	101	32.5265	179	32.5265	216	32.5265	206
32.546	195	32.546	176	32.546	133	32.546	208	32.546	174	32.546	199	32.546	146	32.546	161	32.546	192	32.546	190	32.546	166	32.546	101	32.546	182	32.546	172	32.546	231
32.5655	183	32.5655	175	32.5655	168	32.5655	218	32.5655	204	32.5655	172	32.5655	150	32.5655	158	32.5655	160	32.5655	176	32.5655	187	32.5655	113	32.5655	197	32.5655	215	32.5655	217
32.585	227	32.585	188	32.585	156	32.585	211	32.585	165	32.585	187	32.585	120	32.585	150	32.585	177	32.585	192	32.585	155	32.585	120	32.585	196	32.585	223	32.585	202
32.6045	208	32.6045	185	32.6045	138	32.6045	190	32.6045	194	32.6045	162	32.6045	149	32.6045	157	32.6045	194	32.6045	192	32.6045	180	32.6045	106	32.6045	171	32.6045	202	32.6045	206
32.624	194	32.624	187	32.624	187	32.624	187	32.624	200	32.624	179	32.624	153	32.624	146	32.624	178	32.624	187	32.624	153	32.624	144	32.624	183	32.624	180	32.624	206
32.6435	219	32.6435	189	32.6435	158	32.6435	238	32.6435	224	32.6435	168	32.6435	150	32.6435	139	32.6435	173	32.6435	221	32.6435	158	32.6435	147	32.6435	198	32.6435	224	32.6435	218
32.6629	239	32.6629	184	32.6629	189	32.6629	220	32.6629	208	32.6629	196	32.6629	155	32.6629	135	32.6629	198	32.6629	154	32.6629	185	32.6629	114	32.6629	217	32.6629	213	32.6629	197
32.6824	265	32.6824	167	32.6824	173	32.6824	224	32.6824	219	32.6824	177	32.6824	172	32.6824	159	32.6824	212	32.6824	197	32.6824	189	32.6824	139	32.6824	204	32.6824	229	32.6824	223
32.7019	252	32.7019	208	32.7019	163	32.7019	210	32.7019	230	32.7019	185	32.7019	155	32.7019	160	32.7019	211	32.7019	212	32.7019	201	32.7019	149	32.7019	226	32.7019	248	32.7019	235
32.7214	247	32.7214	210	32.7214	191	32.7214	212	32.7214	257	32.7214	181	32.7214	171	32.7214	165	32.7214	180	32.7214	202	32.7214	186	32.7214	176	32.7214	221	32.7214	247	32.7214	250
32.7409	263	32.7409	192	32.7409	184	32.7409	237	32.7409	257	32.7409	200	32.7409	166	32.7409	166	32.7409	204	32.7409	246	32.7409	205	32.7409	200	32.7409	206	32.7409	247	32.7409	216
32.7604	266	32.7604	195	32.7604	216	32.7604	214	32.7604	274	32.7604	216	32.7604	165	32.7604	175	32.7604	227	32.7604	220	32.7604	230	32.7604	213	32.7604	220	32.7604	231	32.7604	227
32.7799	290	32.7799	155	32.7799	205	32.7799	246	32.7799	278	32.7799	211	32.7799	181	32.7799	158	32.7799	229	32.7799	238	32.7799	244	32.7799	226	32.7799	214	32.7799	254	32.7799	231
32.7994	285	32.7994	250	32.7994	193	32.7994	232	32.7994	295	32.7994	235	32.7994	189	32.7994	182	32.7994	207	32.7994	223	32.7994	225	32.7994	312	32.7994	226	32.7994	268	32.7994	244
32.8188	291	32.8188	209	32.8188	211	32.8188	268	32.8188	297	32.8188	230	32.8188	182	32.8188	184	32.8188	255	32.8188	258	32.8188	258	32.8188	325	32.8188	245	32.8188	257	32.8188	223
32.8383	297	32.8383	205	32.8383	238	32.8383	220	32.8383	293	32.8383	251	32.8383	177	32.8383	201	32.8383	245	32.8383	256	32.8383	265	32.8383	419	32.8383	255	32.8383	281	32.8383	259
32.8578	273	32.8578	211	32.8578	233	32.8578	251	32.8578	283	32.8578	249	32.8578	180	32.8578	175	32.8578	283	32.8578	233	32.8578	247	32.8578	444	32.8578	246	32.8578	273	32.8578	243
32.8773	270	32.8773	220	32.8773	234	32.8773	257	32.8773	301	32.8773	249	32.8773	198	32.8773	221	32.8773	263	32.8773	239	32.8773	250	32.8773	483	32.8773	246	32.8773	274	32.8773	249
32.8968	300	32.8968	207	32.8968	245	32.8968	235	32.8968	278	32.8968	232	32.8968	191	32.8968	178	32.8968	266	32.8968	261	32.8968	281	32.8968	499	32.8968	244	32.8968	239	32.8968	238
32.9163	301	32.9163	195	32.9163	247	32.9163	217	32.9163	295	32.9163	233	32.9163	185	32.9163	209	32.9163	240	32.9163	268	32.9163	261	32.9163	557	32.9163	213	32.9163	276	32.9163	266
32.9358	287	32.9358	226	32.9358	263	32.9358	227	32.9358	278	32.9358	240	32.9358	211	32.9358	188	32.9358	267	32.9358	251	32.9358	292	32.9358	526	32.9358	228	32.9358	265	32.9358	244
32.9553	280	32.9553	196	32.9553	279	32.9553	230	32.9553	290	32.9553	277	32.9553	210	32.9553	220	32.9553	235	32.9553	262	32.9553	282	32.9553	473	32.9553	225	32.9553	260	32.9553	245
32.9748	254	32.9748	212	32.9748	271	32.9748	228	32.9748	275	32.9748	248	32.9748	192	32.9748	197	32.9748	255	32.9748	226	32.9748	281	32.9748	465	32.9748	221	32.9748	257	32.9748	189
32.9943	278	32.9943	178	32.9943	256	32.9943	230	32.9943	242	32.9943	226	32.9943	204	32.9943	190	32.9943	249	32.9943	270	32.9943	261	32.9943	413	32.9943	234	32.9943	262	32.9943	235
33.0138	279	33.0138	199	33.0138	252	33.0138	203	33.0138	257	33.0138	234	33.0138	161	33.0138	177	33.0138	253	33.0138	228	33.0138	264	33.0138	382	33.0138	222	33.0138	278	33.0138	252
33.0332	200	33.0332	211	33.0332	236	33.0332	196	33.0332	232	33.0332	238	33.0332	188	33.0332	218	33.0332	236	33.0332	229	33.0332	246	33.0332	319	33.0332	219	33.0332	224	33.0332	249
33.0527	231	33.0527	203	33.0527	262	33.0527	208	33.0527	245	33.0527	231	33.0527	189	33.0527	202	33.0527	231	33.0527	207	33.0527	260	33.0527	329	33.0527	197	33.0527	260	33.0527	225
33.0722	215	33.0722	204	33.0722	241	33.0722	215	33.0722	205	33.0722	201	33.0722	172	33.0722	198	33.0722	210	33.0722	223	33.0722	231	33.0722	259	33.0722	211	33.0722	226	33.0722	200
33.0917	212	33.0917	190	33.0917	237	33.0917	185	33.0917	211	33.0917	214	33.0917	171	33.0917	181	33.0917	207	33.0917	185	33.0917	249	33.0917	211	33.0917	203	33.0917	221	33.0917	206
33.1112	203	33.1112	188	33.1112	235	33.1112	159	33.1112	195	33.1112	212	33.1112	153	33.1112	193	33.1112	191	33.1112	186	33.1112	237	33.1112	171	33.1112	214	33.1112	224	33.1112	202
33.1307	182	33.1307	184	33.1307	224	33.1307	174	33.1307	189	33.1307	222	33.1307	150	33.1307	179	33.1307	183	33.1307	187	33.1307	204	33.1307	139	33.1307	213	33.1307	187	33.1307	193
33.1502	195	33.1502	142	33.1502	191	33.1502	162	33.1502	168	33.1502	198	33.1502	153	33.1502	179	33.1502	192	33.1502	180	33.1502	183	33.1502	145	33.1502	170	33.1502	187	33.1502	174
33.1697	177	33.1697	165	33.1697	208	33.1697	187	33.1697	150	33.1697	190	33.1697	146	33.1697	180	33.1697	179	33.1697	148	33.1697	166	33.1697	106	33.1697	176	33.1697	200	33.1697	173
33.1891	157	33.1891	144	33.1891	176	33.1891	179	33.1891	131	33.1891	174	33.1891	154	33.1891	157	33.1891	162	33.1891	159	33.1891	151	33.1891	99	33.1891	152	33.1891	175	33.1891	163
33.2086	172	33.2086	162	33.2086	191	33.2086	149	33.2086	137	33.2086	150	33.2086	151	33.2086	147	33.2086	164	33.2086	156	33.2086	151	33.2086	88	33.2086	173	33.2086	150	33.2086	165
33.2281	141	33.2281	136	33.2281	145	33.2281	129	33.2281	114	33.2281	167	33.2281	129	33.2281	134	33.2281	176	33.2281	131	33.2281	139	33.2281	75	33.2281	152	33.2281	136	33.2281	159
33.2476	138	33.2476	154	33.2476	142	33.2476	142	33.2476	122	33.2476	154	33.2476	134	33.2476	125	33.2476	166	33.2476	155	33.2476	152	33.2476	74	33.2476	156	33.2476	150	33.2476	165
33.2671	128	33.2671	147	33.2671	137	33.2671	118	33.2671	137	33.2671	153	33.2671	141	33.2671	153	33.2671	137	33.2671	132	33.2671	143	33.2671	90	33.2671	145	33.2671	149	33.2671	153
33.2866	127	33.2866	144	33.2866	128	33.2866	135	33.2866	110	33.2866	120	33.2866	118	33.2866	130	33.2866	125	33.2866	123	33.2866	113	33.2866	71	33.2866	138	33.2866	155	33.2866	173
33.3061	107	33.3061	135	33.3061	126	33.3061	127	33.3061	105	33.3061	124	33.3061	98	33.3061	116	33.3061	127	33.3061	129	33.3061	106	33.3061	65	33.3061	127	33.3061	146	33.3061	143
33.3256	100	33.3256	130	33.3256	115	33.3256	121	33.3256	110	33.3256	125	33.3256	99	33.3256	116	33.3256	122	33.3256	130	33.3256	107	33.3256	57	33.3256	124	33.3256	145	33.3256	139
33.3451	106	33.3451	138	33.3451	123	33.3451	96	33.3451	90	33.3451	115	33.3451	92	33.3451	121	33.3451	112	33.3451	127	33.3451	118	33.3451	61	33.3451	119	33.3451	117	33.3451	146
33.3646	88	33.3646	121	33.3646	123	33.3646	100	33.3646	71	33.3646	127	33.3646	100	33.3646	118	33.3646	105	33.3646	117	33.3646	99	33.3646	52	33.3646	119	33.3646	120	33.3646	121
33.384	109	33.384	111	33.384	116	33.384	116	33.384	108	33.384	111	33.384	88	33.384	80	33.384	101	33.384	101	33.384	110	33.384	69	33.384	104	33.384	145	33.384	119
33.4035	108	33.4035	117	33.4035	100	33.4035	105	33.4035	96	33.4035	97	33.4035	84	33.4035	110	33.4035	107	33.4035	110	33.4035	88	33.4035	54	33.4035	108	33.4035	105	33.4035	109
33.423	77	33.423	118	33.423	107	33.423	105	33.423	83	33.423	114	33.423	90	33.423	96	33.423	83	33.423	119	33.423	85	33.423	49	33.423	101	33.423	119	33.423	128
33.4425	75	33.4425	94	33.4425	89	33.4425	97	33.4425	66	33.4425	101	33.4425	79	33.4425	91	33.4425	99	33.4425	107	33.4425	73	33.4425	49	33.4425	135	33.4425	100	33.4425	107
33.462	98	33.462	99	33.462	72	33.462	99	33.462	79	33.462	106	33.462	83	33.462	87	33.462	107	33.462	93	33.462	85	33.462	66	33.462	87	33.462	96	33.462	107
33.4815	97	33.4815	99	33.4815	108	33.4815	100	33.4815	74	33.4815	97	33.4815	81	33.4815	84	33.4815	78	33.4815	102	33.4815	78	33.4815	65	33.4815	84	33.4815	111	33.4815	97
33.501	74	33.501	91	33.501	81	33.501	89	33.501	82	33.501	94	33.501	77	33.501	77	33.501	96	33.501	94	33.501	80	33.501	55	33.501	89	33.501	92	33.501	104
33.5205	87	33.5205	112	33.5205	74	33.5205	78	33.5205	72	33.5205	81	33.5205	80	33.5205	90	33.5205	102	33.5205	82	33.5205	92	33.5205	57	33.5205	93	33.5205	121	33.5205	119
33.54	59	33.54	93	33.54	78	33.54	98	33.54	63	33.54	89	33.54	62	33.54	78	33.54	93	33.54	90	33.54	85	33.54	42	33.54	90	33.54	98	33.54	100
33.5594	81	33.5594	95	33.5594	81	33.5594	95	33.5594	65	33.5594	97	33.5594	92	33.5594	76	33.5594	71	33.5594	79	33.5594	72	33.5594	60	33.5594	108	33.5594	99	33.5594	116
33.5789	76	33.5789	81	33.5789	64	33.5789	94	33.5789	70	33.5789	91	33.5789	74	33.5789	87	33.5789	70	33.5789	83	33.5789	72	33.5789	61	33.5789	82	33.5789	88	33.5789	109
33.5984	74	33.5984	78	33.5984	86	33.5984	85	33.5984	71	33.5984	96	33.5984	82	33.5984	86	33.5984	101	33.5984	83	33.5984	63	33.5984	48	33.5984	90	33.5984	99	33.5984	106
33.6179	72	33.6179	110	33.6179	71	33.6179	93	33.6179	57	33.6179	94	33.6179	83	33.6179	81	33.6179	84	33.6179	83	33.6179	79	33.6179	57	33.6179	68	33.6179	79	33.6179	91
33.6374	73	33.6374	92	33.6374	67	33.6374	89	33.6374	78	33.6374	68	33.6374	70	33.6374	71	33.6374	72	33.6374	104	33.6374	72	33.6374	42	33.6374	87	33.6374	86	33.6374	83
33.6569	72	33.6569	87	33.6569	81	33.6569	87	33.6569	58	33.6569	77	33.6569	75	33.6569	79	33.6569	73	33.6569	82	33.6569	59	33.6569	57	33.6569	83	33.6569	77	33.6569	90
33.6764	78	33.6764	90	33.6764	67	33.6764	91	33.6764	61	33.6764	86	33.6764	95	33.6764	83	33.6764	79	33.6764	98	33.6764	66	33.6764	46	33.6764	90	33.6764	85	33.6764	101
33.6959	65	33.6959	96	33.6959	75	33.6959	81	33.6959	61	33.6959	93	33.6959	77	33.6959	79	33.6959	80	33.6959	91	33.6959	81	33.6959	60	33.6959	80	33.6959	75	33.6959	91
33.7154	83	33.7154	102	33.7154	72	33.7154	100	33.7154	71	33.7154	88	33.7154	85	33.7154	78	33.7154	89	33.7154	97	33.7154	68	33.7154	60	33.7154	83	33.7154	93	33.7154	91
33.7349	70	33.7349	99	33.7349	70	33.7349	94	33.7349	66	33.7349	91	33.7349	54	33.7349	79	33.7349	77	33.7349	98	33.7349	63	33.7349	38	33.7349	78	33.7349	84	33.7349	78
33.7543	66	33.7543	90	33.7543	76	33.7543	96	33.7543	73	33.7543	70	33.7543	72	33.7543	68	33.7543	75	33.7543	90	33.7543	91	33.7543	64	33.7543	82	33.7543	85	33.7543	90
33.7738	65	33.7738	100	33.7738	88	33.7738	99	33.7738	82	33.7738	98	33.7738	69	33.7738	78	33.7738	96	33.7738	87	33.7738	81	33.7738	52	33.7738	109	33.7738	86	33.7738	104
33.7933	73	33.7933	105	33.7933	77	33.7933	105	33.7933	67	33.7933	70	33.7933	75	33.7933	93	33.7933	95	33.7933	84	33.7933	81	33.7933	58	33.7933	88	33.7933	89	33.7933	100
33.8128	79	33.8128	94	33.8128	83	33.8128	109	33.8128	80	33.8128	87	33.8128	70	33.8128	79	33.8128	93	33.8128	93	33.8128	73	33.8128	54	33.8128	91	33.8128	81	33.8128	90
33.8323	94	33.8323	88	33.8323	70	33.8323	94	33.8323	96	33.8323	87	33.8323	71	33.8323	78	33.8323	87	33.8323	106	33.8323	76	33.8323	62	33.8323	85	33.8323	89	33.8323	109
33.8518	96	33.8518	108	33.8518	84	33.8518	102	33.8518	79	33.8518	101	33.8518	76	33.8518	81	33.8518	93	33.8518	99	33.8518	80	33.8518	59	33.8518	93	33.8518	102	33.8518	107
33.8713	86	33.8713	89	33.8713	81	33.8713	96	33.8713	69	33.8713	81	33.8713	76	33.8713	87	33.8713	114	33.8713	83	33.8713	72	33.8713	51	33.8713	82	33.8713	87	33.8713	99
33.8908	102	33.8908	92	33.8908	92	33.8908	92	33.8908	93	33.8908	86	33.8908	93	33.8908	77	33.8908	106	33.8908	96	33.8908	107	33.8908	78	33.8908	104	33.8908	108	33.8908	100
33.9103	96	33.9103	104	33.9103	85	33.9103	130	33.9103	111	33.9103	101	33.9103	68	33.9103	63	33.9103	108	33.9103	98	33.9103	99	33.9103	74	33.9103	96	33.9103	103	33.9103	98
33.9297	91	33.9297	107	33.9297	66	33.9297	102	33.9297	102	33.9297	102	33.9297	77	33.9297	98	33.9297	107	33.9297	106	33.9297	86	33.9297	66	33.9297	88	33.9297	101	33.9297	100
33.9492	106	33.9492	113	33.9492	104	33.9492	105	33.9492	121	33.9492	84	33.9492	79	33.9492	88	33.9492	96	33.9492	128	33.9492	103	33.9492	93	33.9492	93	33.9492	104	33.9492	89
33.9687	94	33.9687	102	33.9687	99	33.9687	116	33.9687	105	33.9687	113	33.9687	94	33.9687	97	33.9687	125	33.9687	103	33.9687	113	33.9687	96	33.9687	90	33.9687	115	33.9687	94
33.9882	100	33.9882	111	33.9882	106	33.9882	108	33.9882	125	33.9882	98	33.9882	82	33.9882	92	33.9882	114	33.9882	102	33.9882	110	33.9882	130	33.9882	88	33.9882	122	33.9882	122
34.0077	127	34.0077	101	34.0077	104	34.0077	122	34.0077	136	34.0077	105	34.0077	78	34.0077	102	34.0077	128	34.0077	131	34.0077	111	34.0077	152	34.0077	78	34.0077	115	34.0077	126
34.0272	110	34.0272	103	34.0272	106	34.0272	126	34.0272	126	34.0272	106	34.0272	96	34.0272	104	34.0272	114	34.0272	124	34.0272	122	34.0272	160	34.0272	112	34.0272	127	34.0272	108
34.0467	118	34.0467	104	34.0467	110	34.0467	135	34.0467	119	34.0467	110	34.0467	93	34.0467	92	34.0467	118	34.0467	123	34.0467	105	34.0467	151	34.0467	100	34.0467	106	34.0467	132
34.0662	124	34.0662	111	34.0662	138	34.0662	99	34.0662	130	34.0662	87	34.0662	84	34.0662	110	34.0662	117	34.0662	127	34.0662	117	34.0662	180	34.0662	96	34.0662	102	34.0662	106
34.0857	108	34.0857	129	34.0857	117	34.0857	101	34.0857	121	34.0857	112	34.0857	79	34.0857	90	34.0857	121	34.0857	125	34.0857	115	34.0857	160	34.0857	108	34.0857	135	34.0857	114
34.1052	112	34.1052	94	34.1052	119	34.1052	124	34.1052	127	34.1052	117	34.1052	100	34.1052	106	34.1052	113	34.1052	96	34.1052	136	34.1052	204	34.1052	80	34.1052	111	34.1052	109
34.1246	118	34.1246	101	34.1246	122	34.1246	101	34.1246	110	34.1246	116	34.1246	81	34.1246	95	34.1246	125	34.1246	126	34.1246	114	34.1246	150	34.1246	87	34.1246	103	34.1246	118
34.1441	96	34.1441	89	34.1441	113	34.1441	107	34.1441	126	34.1441	108	34.1441	110	34.1441	88	34.1441	124	34.1441	105	34.1441	123	34.1441	131	34.1441	91	34.1441	126	34.1441	121
34.1636	97	34.1636	90	34.1636	136	34.1636	108	34.1636	94	34.1636	89	34.1636	75	34.1636	102	34.1636	143	34.1636	85	34.1636	103	34.1636	151	34.1636	89	34.1636	94	34.1636	88
34.1831	92	34.1831	82	34.1831	109	34.1831	87	34.1831	108	34.1831	115	34.1831	80	34.1831	77	34.1831	104	34.1831	90	34.1831	101	34.1831	122	34.1831	99	34.1831	100	34.1831	108
34.2026	95	34.2026	79	34.2026	88	34.2026	83	34.2026	96	34.2026	89	34.2026	85	34.2026	91	34.2026	96	34.2026	99	34.2026	117	34.2026	94	34.2026	82	34.2026	88	34.2026	111
34.2221	95	34.2221	97	34.2221	105	34.2221	93	34.2221	95	34.2221	87	34.2221	61	34.2221	82	34.2221	104	34.2221	95	34.2221	109	34.2221	93	34.2221	99	34.2221	94	34.2221	105
34.2416	84	34.2416	80	34.2416	87	34.2416	78	34.2416	85	34.2416	91	34.2416	75	34.2416	87	34.2416	94	34.2416	90	34.2416	99	34.2416	83	34.2416	69	34.2416	94	34.2416	96
34.2611	79	34.2611	99	34.2611	102	34.2611	87	34.2611	73	34.2611	90	34.2611	82	34.2611	86	34.2611	92	34.2611	92	34.2611	95	34.2611	80	34.2611	85	34.2611	80	34.2611	76
34.2806	80	34.2806	73	34.2806	97	34.2806	70	34.2806	82	34.2806	97	34.2806	80	34.2806	88	34.2806	71	34.2806	70	34.2806	82	34.2806	56	34.2806	81	34.2806	80	34.2806	92
34.3	71	34.3	83	34.3	84	34.3	72	34.3	85	34.3	77	34.3	66	34.3	85	34.3	88	34.3	73	34.3	87	34.3	51	34.3	81	34.3	92	34.3	86
34.3195	61	34.3195	69	34.3195	71	34.3195	82	34.3195	63	34.3195	79	34.3195	68	34.3195	75	34.3195	81	34.3195	88	34.3195	63	34.3195	51	34.3195	62	34.3195	80	34.3195	89
34.339	64	34.339	65	34.339	61	34.339	67	34.339	59	34.339	77	34.339	59	34.339	78	34.339	85	34.339	71	34.339	64	34.339	47	34.339	72	34.339	76	34.339	78
34.3585	67	34.3585	75	34.3585	56	34.3585	83	34.3585	48	34.3585	56	34.3585	45	34.3585	61	34.3585	73	34.3585	78	34.3585	84	34.3585	45	34.3585	64	34.3585	62	34.3585	87
34.378	51	34.378	77	34.378	77	34.378	58	34.378	57	34.378	58	34.378	67	34.378	84	34.378	69	34.378	72	34.378	80	34.378	40	34.378	76	34.378	57	34.378	75
34.3975	58	34.3975	70	34.3975	53	34.3975	61	34.3975	58	34.3975	61	34.3975	49	34.3975	62	34.3975	80	34.3975	89	34.3975	55	34.3975	42	34.3975	78	34.3975	69	34.3975	66
34.417	47	34.417	62	34.417	44	34.417	68	34.417	55	34.417	64	34.417	53	34.417	72	34.417	68	34.417	66	34.417	71	34.417	45	34.417	60	34.417	62	34.417	82
34.4365	54	34.4365	77	34.4365	61	34.4365	64	34.4365	47	34.4365	51	34.4365	51	34.4365	72	34.4365	81	34.4365	71	34.4365	50	34.4365	36	34.4365	73	34.4365	51	34.4365	72
34.456	69	34.456	69	34.456	62	34.456	57	34.456	59	34.456	48	34.456	59	34.456	58	34.456	74	34.456	60	34.456	63	34.456	53	34.456	67	34.456	46	34.456	63
34.4755	59	34.4755	59	34.4755	57	34.4755	57	34.4755	53	34.4755	58	34.4755	69	34.4755	71	34.4755	72	34.4755	54	34.4755	65	34.4755	40	34.4755	67	34.4755	46	34.4755	70
34.4949	46	34.4949	72	34.4949	57	34.4949	61	34.4949	55	34.4949	37	34.4949	58	34.4949	67	34.4949	48	34.4949	55	34.4949	55	34.4949	50	34.4949	61	34.4949	64	34.4949	67
34.5144	53	34.5144	66	34.5144	56	34.5144	66	34.5144	50	34.5144	38	34.5144	52	34.5144	49	34.5144	55	34.5144	68	34.5144	52	34.5144	37	34.5144	60	34.5144	62	34.5144	68
34.5339	30	34.5339	67	34.5339	52	34.5339	57	34.5339	41	34.5339	59	34.5339	48	34.5339	58	34.5339	59	34.5339	73	34.5339	63	34.5339	29	34.5339	55	34.5339	49	34.5339	62
34.5534	45	34.5534	59	34.5534	59	34.5534	56	34.5534	41	34.5534	58	34.5534	33	34.5534	51	34.5534	51	34.5534	54	34.5534	59	34.5534	46	34.5534	63	34.5534	70	34.5534	59
34.5729	55	34.5729	59	34.5729	37	34.5729	68	34.5729	42	34.5729	59	34.5729	54	34.5729	57	34.5729	55	34.5729	78	34.5729	52	34.5729	33	34.5729	55	34.5729	64	34.5729	60
34.5924	40	34.5924	54	34.5924	50	34.5924	56	34.5924	57	34.5924	47	34.5924	51	34.5924	56	34.5924	61	34.5924	57	34.5924	59	34.5924	33	34.5924	59	34.5924	48	34.5924	54
34.6119	39	34.6119	61	34.6119	47	34.6119	53	34.6119	40	34.6119	37	34.6119	42	34.6119	56	34.6119	43	34.6119	69	34.6119	63	34.6119	33	34.6119	54	34.6119	52	34.6119	52
34.6314	44	34.6314	66	34.6314	46	34.6314	55	34.6314	27	34.6314	38	34.6314	46	34.6314	57	34.6314	56	34.6314	53	34.6314	54	34.6314	33	34.6314	52	34.6314	56	34.6314	54
34.6509	34	34.6509	62	34.6509	51	34.6509	39	34.6509	39	34.6509	49	34.6509	47	34.6509	55	34.6509	57	34.6509	65	34.6509	56	34.6509	31	34.6509	56	34.6509	52	34.6509	54
34.6703	31	34.6703	51	34.6703	43	34.6703	42	34.6703	34	34.6703	45	34.6703	65	34.6703	56	34.6703	44	34.6703	57	34.6703	36	34.6703	35	34.6703	53	34.6703	58	34.6703	52
34.6898	40	34.6898	54	34.6898	47	34.6898	37	34.6898	42	34.6898	41	34.6898	29	34.6898	38	34.6898	45	34.6898	57	34.6898	55	34.6898	29	34.6898	56	34.6898	63	34.6898	45
34.7093	52	34.7093	50	34.7093	54	34.7093	48	34.7093	33	34.7093	46	34.7093	44	34.7093	58	34.7093	43	34.7093	74	34.7093	49	34.7093	46	34.7093	52	34.7093	36	34.7093	51
34.7288	47	34.7288	56	34.7288	41	34.7288	46	34.7288	49	34.7288	40	34.7288	41	34.7288	49	34.7288	56	34.7288	55	34.7288	44	34.7288	32	34.7288	48	34.7288	44	34.7288	43
34.7483	31	34.7483	40	34.7483	46	34.7483	51	34.7483	44	34.7483	34	34.7483	54	34.7483	48	34.7483	58	34.7483	48	34.7483	50	34.7483	31	34.7483	52	34.7483	52	34.7483	62
34.7678	34	34.7678	54	34.7678	45	34.7678	52	34.7678	36	34.7678	36	34.7678	60	34.7678	60	34.7678	60	34.7678	57	34.7678	45	34.7678	40	34.7678	45	34.7678	48	34.7678	54
34.7873	29	34.7873	43	34.7873	46	34.7873	48	34.7873	42	34.7873	45	34.7873	34	34.7873	56	34.7873	55	34.7873	43	34.7873	46	34.7873	27	34.7873	56	34.7873	49	34.7873	46
34.8068	42	34.8068	53	34.8068	50	34.8068	44	34.8068	40	34.8068	37	34.8068	50	34.8068	41	34.8068	49	34.8068	43	34.8068	52	34.8068	26	34.8068	54	34.8068	56	34.8068	42
34.8263	48	34.8263	48	34.8263	43	34.8263	46	34.8263	46	34.8263	40	34.8263	38	34.8263	46	34.8263	51	34.8263	49	34.8263	45	34.8263	33	34.8263	37	34.8263	49	34.8263	55
34.8458	32	34.8458	48	34.8458	43	34.8458	44	34.8458	29	34.8458	27	34.8458	37	34.8458	55	34.8458	55	34.8458	41	34.8458	38	34.8458	28	34.8458	51	34.8458	50	34.8458	51
34.8652	44	34.8652	48	34.8652	39	34.8652	51	34.8652	41	34.8652	34	34.8652	41	34.8652	45	34.8652	56	34.8652	61	34.8652	47	34.8652	35	34.8652	53	34.8652	52	34.8652	49
34.8847	42	34.8847	49	34.8847	46	34.8847	44	34.8847	38	34.8847	41	34.8847	42	34.8847	41	34.8847	43	34.8847	52	34.8847	51	34.8847	37	34.8847	42	34.8847	37	34.8847	47
34.9042	29	34.9042	63	34.9042	48	34.9042	59	34.9042	49	34.9042	43	34.9042	53	34.9042	47	34.9042	43	34.9042	60	34.9042	51	34.9042	28	34.9042	44	34.9042	41	34.9042	59
34.9237	42	34.9237	45	34.9237	48	34.9237	58	34.9237	46	34.9237	40	34.9237	49	34.9237	56	34.9237	50	34.9237	60	34.9237	44	34.9237	27	34.9237	41	34.9237	55	34.9237	58
34.9432	49	34.9432	48	34.9432	45	34.9432	52	34.9432	39	34.9432	48	34.9432	40	34.9432	48	34.9432	48	34.9432	58	34.9432	46	34.9432	33	34.9432	48	34.9432	35	34.9432	62
34.9627	33	34.9627	47	34.9627	28	34.9627	39	34.9627	32	34.9627	28	34.9627	39	34.9627	62	34.9627	55	34.9627	38	34.9627	36	34.9627	25	34.9627	59	34.9627	29	34.9627	40
34.9822	47	34.9822	50	34.9822	43	34.9822	45	34.9822	34	34.9822	32	34.9822	37	34.9822	48	34.9822	40	34.9822	61	34.9822	39	34.9822	30	34.9822	37	34.9822	56	34.9822	56
35.0017	36	35.0017	50	35.0017	48	35.0017	56	35.0017	42	35.0017	51	35.0017	55	35.0017	48	35.0017	44	35.0017	50	35.0017	53	35.0017	31	35.0017	65	35.0017	44	35.0017	47
35.0211	40	35.0211	53	35.0211	43	35.0211	48	35.0211	29	35.0211	30	35.0211	55	35.0211	56	35.0211	45	35.0211	52	35.0211	54	35.0211	34	35.0211	46	35.0211	40	35.0211	60
35.0406	40	35.0406	48	35.0406	40	35.0406	41	35.0406	40	35.0406	32	35.0406	61	35.0406	41	35.0406	61	35.0406	49	35.0406	38	35.0406	28	35.0406	54	35.0406	46	35.0406	61
35.0601	32	35.0601	56	35.0601	40	35.0601	47	35.0601	45	35.0601	49	35.0601	41	35.0601	37	35.0601	46	35.0601	51	35.0601	47	35.0601	28	35.0601	50	35.0601	33	35.0601	54
35.0796	34	35.0796	50	35.0796	42	35.0796	46	35.0796	37	35.0796	47	35.0796	50	35.0796	39	35.0796	40	35.0796	49	35.0796	46	35.0796	29	35.0796	32	35.0796	57	35.0796	44
35.0991	40	35.0991	38	35.0991	50	35.0991	56	35.0991	33	35.0991	31	35.0991	44	35.0991	47	35.0991	43	35.0991	55	35.0991	49	35.0991	28	35.0991	50	35.0991	52	35.0991	60
35.1186	42	35.1186	55	35.1186	39	35.1186	52	35.1186	43	35.1186	37	35.1186	43	35.1186	38	35.1186	50	35.1186	43	35.1186	41	35.1186	31	35.1186	53	35.1186	41	35.1186	51
35.1381	55	35.1381	50	35.1381	34	35.1381	64	35.1381	35	35.1381	51	35.1381	33	35.1381	59	35.1381	57	35.1381	59	35.1381	46	35.1381	20	35.1381	48	35.1381	45	35.1381	48
35.1576	36	35.1576	54	35.1576	48	35.1576	52	35.1576	44	35.1576	39	35.1576	47	35.1576	54	35.1576	40	35.1576	46	35.1576	50	35.1576	36	35.1576	53	35.1576	61	35.1576	50
35.1771	44	35.1771	42	35.1771	35	35.1771	62	35.1771	44	35.1771	36	35.1771	29	35.1771	56	35.1771	44	35.1771	55	35.1771	60	35.1771	26	35.1771	40	35.1771	43	35.1771	70
35.1966	37	35.1966	49	35.1966	38	35.1966	37	35.1966	42	35.1966	44	35.1966	44	35.1966	62	35.1966	63	35.1966	56	35.1966	44	35.1966	39	35.1966	66	35.1966	45	35.1966	53
35.216	46	35.216	43	35.216	46	35.216	54	35.216	48	35.216	43	35.216	52	35.216	52	35.216	60	35.216	68	35.216	53	35.216	35	35.216	48	35.216	47	35.216	47
35.2355	41	35.2355	48	35.2355	43	35.2355	55	35.2355	39	35.2355	42	35.2355	30	35.2355	41	35.2355	54	35.2355	50	35.2355	67	35.2355	37	35.2355	45	35.2355	33	35.2355	50
35.255	56	35.255	51	35.255	38	35.255	50	35.255	34	35.255	39	35.255	49	35.255	43	35.255	56	35.255	62	35.255	35	35.255	37	35.255	65	35.255	44	35.255	56
35.2745	51	35.2745	48	35.2745	42	35.2745	48	35.2745	47	35.2745	54	35.2745	48	35.2745	44	35.2745	60	35.2745	57	35.2745	55	35.2745	29	35.2745	50	35.2745	41	35.2745	47
35.294	38	35.294	56	35.294	36	35.294	56	35.294	47	35.294	34	35.294	38	35.294	57	35.294	33	35.294	58	35.294	45	35.294	22	35.294	47	35.294	48	35.294	62
35.3135	54	35.3135	50	35.3135	58	35.3135	48	35.3135	44	35.3135	41	35.3135	43	35.3135	63	35.3135	49	35.3135	56	35.3135	52	35.3135	36	35.3135	57	35.3135	43	35.3135	51
35.333	41	35.333	43	35.333	61	35.333	54	35.333	47	35.333	49	35.333	52	35.333	49	35.333	49	35.333	51	35.333	62	35.333	43	35.333	50	35.333	49	35.333	50
35.3525	42	35.3525	60	35.3525	43	35.3525	54	35.3525	46	35.3525	33	35.3525	39	35.3525	56	35.3525	46	35.3525	41	35.3525	58	35.3525	48	35.3525	61	35.3525	54	35.3525	58
35.372	41	35.372	51	35.372	62	35.372	51	35.372	49	35.372	37	35.372	46	35.372	35	35.372	50	35.372	71	35.372	59	35.372	48	35.372	54	35.372	41	35.372	52
35.3914	57	35.3914	63	35.3914	53	35.3914	57	35.3914	34	35.3914	37	35.3914	55	35.3914	47	35.3914	66	35.3914	56	35.3914	68	35.3914	41	35.3914	59	35.3914	50	35.3914	62
35.4109	48	35.4109	58	35.4109	51	35.4109	55	35.4109	44	35.4109	40	35.4109	44	35.4109	52	35.4109	53	35.4109	66	35.4109	50	35.4109	57	35.4109	52	35.4109	51	35.4109	57
35.4304	48	35.4304	62	35.4304	54	35.4304	69	35.4304	53	35.4304	60	35.4304	47	35.4304	56	35.4304	60	35.4304	62	35.4304	64	35.4304	52	35.4304	65	35.4304	61	35.4304	42
35.4499	45	35.4499	58	35.4499	50	35.4499	50	35.4499	61	35.4499	42	35.4499	32	35.4499	56	35.4499	52	35.4499	52	35.4499	47	35.4499	51	35.4499	46	35.4499	51	35.4499	59
35.4694	50	35.4694	47	35.4694	40	35.4694	70	35.4694	44	35.4694	43	35.4694	41	35.4694	39	35.4694	51	35.4694	52	35.4694	49	35.4694	61	35.4694	51	35.4694	51	35.4694	49
35.4889	39	35.4889	47	35.4889	46	35.4889	48	35.4889	51	35.4889	38	35.4889	43	35.4889	47	35.4889	42	35.4889	55	35.4889	47	35.4889	68	35.4889	49	35.4889	48	35.4889	58
35.5084	44	35.5084	60	35.5084	52	35.5084	66	35.5084	44	35.5084	52	35.5084	52	35.5084	52	35.5084	57	35.5084	57	35.5084	57	35.5084	60	35.5084	59	35.5084	58	35.5084	63
35.5279	48	35.5279	46	35.5279	50	35.5279	45	35.5279	57	35.5279	48	35.5279	40	35.5279	50	35.5279	48	35.5279	61	35.5279	64	35.5279	53	35.5279	52	35.5279	54	35.5279	69
35.5474	52	35.5474	59	35.5474	52	35.5474	50	35.5474	62	35.5474	57	35.5474	46	35.5474	47	35.5474	61	35.5474	57	35.5474	58	35.5474	60	35.5474	42	35.5474	46	35.5474	53
35.5669	49	35.5669	48	35.5669	44	35.5669	48	35.5669	55	35.5669	43	35.5669	45	35.5669	45	35.5669	56	35.5669	47	35.5669	55	35.5669	51	35.5669	59	35.5669	49	35.5669	58
35.5863	48	35.5863	67	35.5863	44	35.5863	47	35.5863	36	35.5863	56	35.5863	49	35.5863	40	35.5863	53	35.5863	57	35.5863	44	35.5863	52	35.5863	49	35.5863	49	35.5863	47
35.6058	48	35.6058	66	35.6058	48	35.6058	56	35.6058	44	35.6058	40	35.6058	39	35.6058	59	35.6058	47	35.6058	55	35.6058	52	35.6058	40	35.6058	40	35.6058	67	35.6058	58
35.6253	41	35.6253	45	35.6253	48	35.6253	44	35.6253	45	35.6253	46	35.6253	45	35.6253	49	35.6253	53	35.6253	54	35.6253	50	35.6253	44	35.6253	57	35.6253	45	35.6253	42
35.6448	31	35.6448	48	35.6448	46	35.6448	50	35.6448	33	35.6448	44	35.6448	37	35.6448	48	35.6448	47	35.6448	48	35.6448	49	35.6448	33	35.6448	49	35.6448	61	35.6448	47
35.6643	35	35.6643	49	35.6643	47	35.6643	43	35.6643	41	35.6643	43	35.6643	42	35.6643	52	35.6643	57	35.6643	55	35.6643	57	35.6643	38	35.6643	62	35.6643	47	35.6643	56
35.6838	32	35.6838	46	35.6838	44	35.6838	44	35.6838	47	35.6838	56	35.6838	47	35.6838	68	35.6838	50	35.6838	56	35.6838	40	35.6838	34	35.6838	46	35.6838	55	35.6838	56
35.7033	39	35.7033	57	35.7033	42	35.7033	58	35.7033	42	35.7033	47	35.7033	50	35.7033	54	35.7033	58	35.7033	56	35.7033	47	35.7033	38	35.7033	54	35.7033	52	35.7033	39
35.7228	38	35.7228	53	35.7228	44	35.7228	45	35.7228	39	35.7228	37	35.7228	37	35.7228	52	35.7228	52	35.7228	43	35.7228	52	35.7228	34	35.7228	46	35.7228	45	35.7228	38
35.7423	38	35.7423	41	35.7423	40	35.7423	49	35.7423	31	35.7423	38	35.7423	37	35.7423	55	35.7423	46	35.7423	55	35.7423	48	35.7423	20	35.7423	60	35.7423	47	35.7423	57
35.7617	39	35.7617	47	35.7617	40	35.7617	49	35.7617	39	35.7617	46	35.7617	42	35.7617	54	35.7617	55	35.7617	52	35.7617	40	35.7617	24	35.7617	40	35.7617	54	35.7617	59
35.7812	37	35.7812	39	35.7812	36	35.7812	50	35.7812	36	35.7812	41	35.7812	34	35.7812	70	35.7812	39	35.7812	61	35.7812	48	35.7812	22	35.7812	48	35.7812	45	35.7812	41
35.8007	33	35.8007	57	35.8007	51	35.8007	54	35.8007	28	35.8007	51	35.8007	32	35.8007	49	35.8007	40	35.8007	57	35.8007	44	35.8007	31	35.8007	49	35.8007	49	35.8007	50
35.8202	49	35.8202	40	35.8202	45	35.8202	46	35.8202	42	35.8202	50	35.8202	45	35.8202	54	35.8202	41	35.8202	30	35.8202	51	35.8202	26	35.8202	44	35.8202	53	35.8202	52
35.8397	49	35.8397	60	35.8397	37	35.8397	49	35.8397	36	35.8397	54	35.8397	39	35.8397	43	35.8397	49	35.8397	50	35.8397	47	35.8397	25	35.8397	44	35.8397	34	35.8397	42
35.8592	41	35.8592	51	35.8592	37	35.8592	44	35.8592	28	35.8592	37	35.8592	43	35.8592	43	35.8592	37	35.8592	39	35.8592	43	35.8592	20	35.8592	46	35.8592	39	35.8592	59
35.8787	48	35.8787	47	35.8787	34	35.8787	52	35.8787	34	35.8787	39	35.8787	47	35.8787	44	35.8787	33	35.8787	54	35.8787	43	35.8787	22	35.8787	43	35.8787	45	35.8787	48
35.8982	44	35.8982	39	35.8982	33	35.8982	41	35.8982	36	35.8982	41	35.8982	40	35.8982	50	35.8982	39	35.8982	44	35.8982	56	35.8982	31	35.8982	30	35.8982	48	35.8982	60
35.9177	42	35.9177	53	35.9177	33	35.9177	56	35.9177	40	35.9177	44	35.9177	41	35.9177	47	35.9177	54	35.9177	52	35.9177	37	35.9177	27	35.9177	42	35.9177	42	35.9177	44
35.9372	45	35.9372	38	35.9372	33	35.9372	53	35.9372	43	35.9372	39	35.9372	44	35.9372	32	35.9372	36	35.9372	43	35.9372	27	35.9372	32	35.9372	42	35.9372	50	35.9372	59
35.9566	70	35.9566	55	35.9566	37	35.9566	53	35.9566	35	35.9566	39	35.9566	46	35.9566	49	35.9566	50	35.9566	54	35.9566	49	35.9566	21	35.9566	46	35.9566	33	35.9566	43
35.9761	193	35.9761	47	35.9761	42	35.9761	56	35.9761	39	35.9761	26	35.9761	30	35.9761	57	35.9761	36	35.9761	58	35.9761	55	35.9761	19	35.9761	50	35.9761	49	35.9761	41
35.9956	586	35.9956	46	35.9956	36	35.9956	40	35.9956	44	35.9956	25	35.9956	35	35.9956	48	35.9956	39	35.9956	51	35.9956	45	35.9956	20	35.9956	38	35.9956	34	35.9956	41
36.0151	459	36.0151	53	36.0151	37	36.0151	55	36.0151	28	36.0151	27	36.0151	43	36.0151	65	36.0151	53	36.0151	52	36.0151	36	36.0151	18	36.0151	37	36.0151	31	36.0151	41
36.0346	131	36.0346	62	36.0346	33	36.0346	39	36.0346	20	36.0346	24	36.0346	59	36.0346	53	36.0346	45	36.0346	35	36.0346	36	36.0346	30	36.0346	38	36.0346	35	36.0346	46
36.0541	74	36.0541	40	36.0541	31	36.0541	44	36.0541	38	36.0541	39	36.0541	31	36.0541	37	36.0541	36	36.0541	47	36.0541	33	36.0541	29	36.0541	46	36.0541	26	36.0541	47
36.0736	166	36.0736	39	36.0736	39	36.0736	46	36.0736	36	36.0736	29	36.0736	38	36.0736	57	36.0736	44	36.0736	34	36.0736	33	36.0736	27	36.0736	36	36.0736	36	36.0736	42
36.0931	329	36.0931	51	36.0931	41	36.0931	59	36.0931	34	36.0931	31	36.0931	41	36.0931	51	36.0931	38	36.0931	39	36.0931	44	36.0931	23	36.0931	46	36.0931	26	36.0931	61
36.1126	172	36.1126	46	36.1126	25	36.1126	35	36.1126	32	36.1126	26	36.1126	31	36.1126	33	36.1126	33	36.1126	41	36.1126	43	36.1126	31	36.1126	48	36.1126	32	36.1126	29
36.132	76	36.132	35	36.132	42	36.132	48	36.132	33	36.132	39	36.132	49	36.132	42	36.132	48	36.132	48	36.132	36	36.132	32	36.132	39	36.132	40	36.132	48
36.1515	43	36.1515	34	36.1515	38	36.1515	38	36.1515	33	36.1515	30	36.1515	46	36.1515	40	36.1515	31	36.1515	35	36.1515	43	36.1515	30	36.1515	44	36.1515	49	36.1515	39
36.171	43	36.171	43	36.171	29	36.171	27	36.171	31	36.171	30	36.171	35	36.171	43	36.171	50	36.171	41	36.171	32	36.171	26	36.171	36	36.171	28	36.171	43
36.1905	31	36.1905	38	36.1905	40	36.1905	46	36.1905	31	36.1905	37	36.1905	25	36.1905	39	36.1905	38	36.1905	41	36.1905	43	36.1905	24	36.1905	19	36.1905	31	36.1905	31
36.21	35	36.21	42	36.21	35	36.21	36	36.21	38	36.21	40	36.21	33	36.21	41	36.21	29	36.21	38	36.21	32	36.21	26	36.21	50	36.21	33	36.21	44
36.2295	25	36.2295	45	36.2295	48	36.2295	30	36.2295	26	36.2295	32	36.2295	38	36.2295	37	36.2295	36	36.2295	46	36.2295	41	36.2295	22	36.2295	32	36.2295	35	36.2295	46
36.249	26	36.249	41	36.249	28	36.249	50	36.249	32	36.249	25	36.249	33	36.249	41	36.249	38	36.249	56	36.249	39	36.249	30	36.249	42	36.249	33	36.249	35
36.2685	34	36.2685	38	36.2685	27	36.2685	31	36.2685	30	36.2685	36	36.2685	28	36.2685	34	36.2685	40	36.2685	38	36.2685	34	36.2685	26	36.2685	41	36.2685	40	36.2685	38
36.288	32	36.288	51	36.288	32	36.288	30	36.288	36	36.288	30	36.288	39	36.288	43	36.288	41	36.288	42	36.288	34	36.288	30	36.288	41	36.288	35	36.288	48
36.3075	22	36.3075	45	36.3075	34	36.3075	35	36.3075	33	36.3075	41	36.3075	30	36.3075	35	36.3075	42	36.3075	31	36.3075	34	36.3075	27	36.3075	56	36.3075	31	36.3075	34
36.3269	25	36.3269	37	36.3269	45	36.3269	43	36.3269	27	36.3269	29	36.3269	37	36.3269	36	36.3269	34	36.3269	54	36.3269	34	36.3269	24	36.3269	38	36.3269	33	36.3269	45
36.3464	39	36.3464	46	36.3464	37	36.3464	25	36.3464	28	36.3464	25	36.3464	34	36.3464	40	36.3464	37	36.3464	50	36.3464	38	36.3464	20	36.3464	35	36.3464	29	36.3464	51
36.3659	30	36.3659	43	36.3659	29	36.3659	39	36.3659	24	36.3659	30	36.3659	33	36.3659	34	36.3659	49	36.3659	41	36.3659	46	36.3659	33	36.3659	25	36.3659	33	36.3659	45
36.3854	28	36.3854	46	36.3854	27	36.3854	23	36.3854	18	36.3854	21	36.3854	37	36.3854	23	36.3854	37	36.3854	64	36.3854	48	36.3854	16	36.3854	52	36.3854	37	36.3854	40
36.4049	30	36.4049	39	36.4049	35	36.4049	37	36.4049	25	36.4049	25	36.4049	35	36.4049	40	36.4049	38	36.4049	50	36.4049	34	36.4049	24	36.4049	41	36.4049	45	36.4049	31
36.4244	25	36.4244	43	36.4244	51	36.4244	25	36.4244	29	36.4244	31	36.4244	36	36.4244	35	36.4244	27	36.4244	39	36.4244	27	36.4244	21	36.4244	26	36.4244	29	36.4244	48
36.4439	35	36.4439	48	36.4439	27	36.4439	34	36.4439	22	36.4439	38	36.4439	32	36.4439	33	36.4439	39	36.4439	34	36.4439	39	36.4439	28	36.4439	36	36.4439	36	36.4439	42
36.4634	25	36.4634	49	36.4634	21	36.4634	41	36.4634	28	36.4634	33	36.4634	35	36.4634	37	36.4634	39	36.4634	32	36.4634	33	36.4634	30	36.4634	43	36.4634	29	36.4634	37
36.4829	26	36.4829	35	36.4829	28	36.4829	35	36.4829	31	36.4829	31	36.4829	27	36.4829	25	36.4829	25	36.4829	58	36.4829	35	36.4829	35	36.4829	42	36.4829	31	36.4829	35
36.5023	26	36.5023	36	36.5023	34	36.5023	43	36.5023	29	36.5023	27	36.5023	37	36.5023	42	36.5023	35	36.5023	41	36.5023	38	36.5023	23	36.5023	43	36.5023	33	36.5023	39
36.5218	29	36.5218	32	36.5218	22	36.5218	25	36.5218	29	36.5218	24	36.5218	34	36.5218	32	36.5218	31	36.5218	38	36.5218	37	36.5218	28	36.5218	35	36.5218	29	36.5218	49
36.5413	26	36.5413	39	36.5413	32	36.5413	43	36.5413	28	36.5413	33	36.5413	31	36.5413	46	36.5413	37	36.5413	49	36.5413	45	36.5413	32	36.5413	40	36.5413	33	36.5413	39
36.5608	26	36.5608	38	36.5608	37	36.5608	42	36.5608	30	36.5608	29	36.5608	30	36.5608	45	36.5608	23	36.5608	48	36.5608	40	36.5608	18	36.5608	35	36.5608	29	36.5608	41
36.5803	26	36.5803	39	36.5803	34	36.5803	28	36.5803	24	36.5803	33	36.5803	31	36.5803	43	36.5803	48	36.5803	38	36.5803	33	36.5803	26	36.5803	44	36.5803	26	36.5803	32
36.5998	27	36.5998	37	36.5998	35	36.5998	31	36.5998	21	36.5998	29	36.5998	36	36.5998	48	36.5998	37	36.5998	38	36.5998	35	36.5998	22	36.5998	37	36.5998	28	36.5998	43
36.6193	19	36.6193	31	36.6193	33	36.6193	33	36.6193	37	36.6193	30	36.6193	26	36.6193	39	36.6193	26	36.6193	42	36.6193	26	36.6193	19	36.6193	36	36.6193	32	36.6193	35
36.6388	29	36.6388	52	36.6388	39	36.6388	37	36.6388	24	36.6388	33	36.6388	36	36.6388	38	36.6388	38	36.6388	30	36.6388	21	36.6388	17	36.6388	33	36.6388	26	36.6388	42
36.6583	26	36.6583	39	36.6583	28	36.6583	37	36.6583	32	36.6583	35	36.6583	27	36.6583	45	36.6583	27	36.6583	44	36.6583	20	36.6583	27	36.6583	47	36.6583	39	36.6583	26
36.6778	30	36.6778	44	36.6778	36	36.6778	35	36.6778	27	36.6778	36	36.6778	23	36.6778	47	36.6778	44	36.6778	38	36.6778	39	36.6778	21	36.6778	26	36.6778	26	36.6778	43
36.6972	30	36.6972	41	36.6972	30	36.6972	38	36.6972	30	36.6972	34	36.6972	21	36.6972	42	36.6972	38	36.6972	47	36.6972	28	36.6972	25	36.6972	27	36.6972	31	36.6972	34
36.7167	27	36.7167	43	36.7167	37	36.7167	37	36.7167	18	36.7167	37	36.7167	31	36.7167	36	36.7167	29	36.7167	50	36.7167	32	36.7167	18	36.7167	36	36.7167	36	36.7167	29
36.7362	28	36.7362	48	36.7362	26	36.7362	33	36.7362	31	36.7362	24	36.7362	42	36.7362	33	36.7362	39	36.7362	41	36.7362	29	36.7362	18	36.7362	37	36.7362	32	36.7362	41
36.7557	22	36.7557	36	36.7557	32	36.7557	34	36.7557	32	36.7557	31	36.7557	33	36.7557	42	36.7557	27	36.7557	28	36.7557	52	36.7557	27	36.7557	33	36.7557	36	36.7557	43
36.7752	25	36.7752	36	36.7752	26	36.7752	40	36.7752	29	36.7752	22	36.7752	27	36.7752	42	36.7752	30	36.7752	42	36.7752	35	36.7752	13	36.7752	35	36.7752	36	36.7752	35
36.7947	29	36.7947	34	36.7947	23	36.7947	38	36.7947	26	36.7947	25	36.7947	34	36.7947	43	36.7947	40	36.7947	42	36.7947	35	36.7947	33	36.7947	40	36.7947	30	36.7947	45
36.8142	24	36.8142	33	36.8142	24	36.8142	32	36.8142	21	36.8142	34	36.8142	34	36.8142	33	36.8142	40	36.8142	37	36.8142	27	36.8142	34	36.8142	35	36.8142	33	36.8142	30
36.8337	26	36.8337	45	36.8337	36	36.8337	43	36.8337	29	36.8337	27	36.8337	21	36.8337	40	36.8337	36	36.8337	32	36.8337	41	36.8337	17	36.8337	33	36.8337	36	36.8337	30
36.8531	25	36.8531	44	36.8531	44	36.8531	36	36.8531	20	36.8531	29	36.8531	33	36.8531	33	36.8531	40	36.8531	46	36.8531	38	36.8531	28	36.8531	30	36.8531	28	36.8531	36
36.8726	26	36.8726	41	36.8726	32	36.8726	39	36.8726	24	36.8726	30	36.8726	35	36.8726	28	36.8726	41	36.8726	38	36.8726	35	36.8726	17	36.8726	35	36.8726	32	36.8726	42
36.8921	30	36.8921	53	36.8921	31	36.8921	30	36.8921	23	36.8921	28	36.8921	27	36.8921	42	36.8921	29	36.8921	34	36.8921	33	36.8921	20	36.8921	27	36.8921	32	36.8921	44
36.9116	22	36.9116	44	36.9116	39	36.9116	29	36.9116	21	36.9116	31	36.9116	24	36.9116	28	36.9116	39	36.9116	31	36.9116	32	36.9116	33	36.9116	37	36.9116	35	36.9116	30
36.9311	23	36.9311	35	36.9311	31	36.9311	30	36.9311	30	36.9311	17	36.9311	25	36.9311	35	36.9311	30	36.9311	54	36.9311	23	36.9311	20	36.9311	41	36.9311	26	36.9311	31
36.9506	24	36.9506	41	36.9506	30	36.9506	32	36.9506	33	36.9506	32	36.9506	27	36.9506	46	36.9506	38	36.9506	36	36.9506	39	36.9506	21	36.9506	40	36.9506	33	36.9506	28
36.9701	28	36.9701	37	36.9701	30	36.9701	36	36.9701	23	36.9701	25	36.9701	29	36.9701	42	36.9701	33	36.9701	41	36.9701	39	36.9701	21	36.9701	35	36.9701	33	36.9701	34
36.9896	27	36.9896	42	36.9896	28	36.9896	27	36.9896	28	36.9896	24	36.9896	32	36.9896	43	36.9896	38	36.9896	39	36.9896	32	36.9896	26	36.9896	25	36.9896	30	36.9896	30
37.0091	21	37.0091	33	37.0091	31	37.0091	34	37.0091	22	37.0091	32	37.0091	30	37.0091	25	37.0091	37	37.0091	37	37.0091	35	37.0091	21	37.0091	40	37.0091	37	37.0091	28
37.0286	22	37.0286	37	37.0286	25	37.0286	36	37.0286	33	37.0286	26	37.0286	37	37.0286	38	37.0286	27	37.0286	42	37.0286	28	37.0286	25	37.0286	40	37.0286	30	37.0286	25
37.0481	28	37.0481	34	37.0481	34	37.0481	24	37.0481	22	37.0481	40	37.0481	27	37.0481	42	37.0481	36	37.0481	38	37.0481	33	37.0481	25	37.0481	39	37.0481	32	37.0481	36
37.0675	22	37.0675	33	37.0675	32	37.0675	40	37.0675	30	37.0675	26	37.0675	36	37.0675	27	37.0675	39	37.0675	43	37.0675	37	37.0675	24	37.0675	37	37.0675	34	37.0675	26
37.087	22	37.087	28	37.087	34	37.087	38	37.087	28	37.087	21	37.087	34	37.087	29	37.087	35	37.087	40	37.087	44	37.087	16	37.087	52	37.087	31	37.087	34
37.1065	27	37.1065	28	37.1065	25	37.1065	29	37.1065	25	37.1065	38	37.1065	33	37.1065	44	37.1065	33	37.1065	39	37.1065	37	37.1065	21	37.1065	29	37.1065	35	37.1065	37
37.126	18	37.126	30	37.126	36	37.126	31	37.126	19	37.126	32	37.126	27	37.126	38	37.126	31	37.126	42	37.126	35	37.126	29	37.126	31	37.126	26	37.126	36
37.1455	32	37.1455	33	37.1455	41	37.1455	28	37.1455	23	37.1455	23	37.1455	23	37.1455	31	37.1455	32	37.1455	38	37.1455	37	37.1455	30	37.1455	42	37.1455	26	37.1455	20
37.165	22	37.165	38	37.165	45	37.165	44	37.165	26	37.165	24	37.165	31	37.165	28	37.165	37	37.165	33	37.165	41	37.165	25	37.165	33	37.165	35	37.165	38
37.1845	20	37.1845	22	37.1845	39	37.1845	40	37.1845	16	37.1845	36	37.1845	29	37.1845	38	37.1845	36	37.1845	40	37.1845	42	37.1845	34	37.1845	33	37.1845	29	37.1845	43
37.204	33	37.204	44	37.204	28	37.204	33	37.204	26	37.204	30	37.204	24	37.204	26	37.204	33	37.204	44	37.204	42	37.204	18	37.204	45	37.204	28	37.204	41
37.2234	26	37.2234	27	37.2234	30	37.2234	32	37.2234	25	37.2234	30	37.2234	19	37.2234	37	37.2234	30	37.2234	39	37.2234	20	37.2234	27	37.2234	30	37.2234	26	37.2234	37
37.2429	21	37.2429	31	37.2429	30	37.2429	31	37.2429	29	37.2429	21	37.2429	20	37.2429	40	37.2429	28	37.2429	31	37.2429	32	37.2429	21	37.2429	37	37.2429	25	37.2429	22
37.2624	22	37.2624	48	37.2624	20	37.2624	34	37.2624	26	37.2624	29	37.2624	29	37.2624	35	37.2624	32	37.2624	30	37.2624	33	37.2624	31	37.2624	42	37.2624	40	37.2624	36
37.2819	23	37.2819	38	37.2819	29	37.2819	35	37.2819	24	37.2819	28	37.2819	29	37.2819	41	37.2819	24	37.2819	39	37.2819	32	37.2819	25	37.2819	30	37.2819	36	37.2819	19
37.3014	19	37.3014	34	37.3014	27	37.3014	40	37.3014	19	37.3014	25	37.3014	31	37.3014	36	37.3014	45	37.3014	47	37.3014	28	37.3014	18	37.3014	45	37.3014	21	37.3014	32
37.3209	28	37.3209	23	37.3209	27	37.3209	24	37.3209	21	37.3209	24	37.3209	29	37.3209	43	37.3209	22	37.3209	46	37.3209	38	37.3209	21	37.3209	35	37.3209	46	37.3209	33
37.3404	18	37.3404	49	37.3404	31	37.3404	29	37.3404	34	37.3404	26	37.3404	41	37.3404	38	37.3404	42	37.3404	41	37.3404	44	37.3404	28	37.3404	31	37.3404	33	37.3404	45
37.3599	22	37.3599	33	37.3599	35	37.3599	33	37.3599	28	37.3599	30	37.3599	25	37.3599	34	37.3599	39	37.3599	32	37.3599	25	37.3599	11	37.3599	34	37.3599	28	37.3599	31
37.3794	25	37.3794	33	37.3794	34	37.3794	31	37.3794	21	37.3794	34	37.3794	35	37.3794	38	37.3794	41	37.3794	43	37.3794	24	37.3794	23	37.3794	32	37.3794	40	37.3794	27
37.3989	20	37.3989	30	37.3989	33	37.3989	25	37.3989	25	37.3989	30	37.3989	30	37.3989	35	37.3989	46	37.3989	40	37.3989	40	37.3989	20	37.3989	43	37.3989	34	37.3989	37
37.4183	37	37.4183	26	37.4183	35	37.4183	32	37.4183	32	37.4183	36	37.4183	33	37.4183	35	37.4183	40	37.4183	42	37.4183	34	37.4183	21	37.4183	41	37.4183	27	37.4183	29
37.4378	19	37.4378	29	37.4378	22	37.4378	29	37.4378	24	37.4378	29	37.4378	30	37.4378	44	37.4378	33	37.4378	30	37.4378	29	37.4378	22	37.4378	33	37.4378	26	37.4378	51
37.4573	15	37.4573	36	37.4573	13	37.4573	37	37.4573	27	37.4573	18	37.4573	31	37.4573	36	37.4573	32	37.4573	42	37.4573	36	37.4573	28	37.4573	32	37.4573	28	37.4573	41
37.4768	29	37.4768	43	37.4768	28	37.4768	40	37.4768	24	37.4768	33	37.4768	20	37.4768	37	37.4768	28	37.4768	38	37.4768	40	37.4768	19	37.4768	47	37.4768	27	37.4768	32
37.4963	33	37.4963	41	37.4963	31	37.4963	37	37.4963	29	37.4963	21	37.4963	37	37.4963	43	37.4963	30	37.4963	40	37.4963	31	37.4963	28	37.4963	42	37.4963	39	37.4963	34
37.5158	36	37.5158	33	37.5158	21	37.5158	29	37.5158	29	37.5158	33	37.5158	23	37.5158	39	37.5158	32	37.5158	25	37.5158	37	37.5158	14	37.5158	40	37.5158	23	37.5158	34
37.5353	25	37.5353	33	37.5353	27	37.5353	26	37.5353	28	37.5353	27	37.5353	27	37.5353	49	37.5353	24	37.5353	37	37.5353	34	37.5353	29	37.5353	22	37.5353	32	37.5353	42
37.5548	25	37.5548	28	37.5548	36	37.5548	36	37.5548	32	37.5548	29	37.5548	38	37.5548	28	37.5548	42	37.5548	39	37.5548	28	37.5548	17	37.5548	33	37.5548	40	37.5548	36
37.5743	22	37.5743	39	37.5743	32	37.5743	48	37.5743	22	37.5743	31	37.5743	34	37.5743	36	37.5743	38	37.5743	39	37.5743	33	37.5743	11	37.5743	30	37.5743	37	37.5743	50
37.5938	22	37.5938	32	37.5938	30	37.5938	27	37.5938	26	37.5938	29	37.5938	36	37.5938	41	37.5938	42	37.5938	33	37.5938	29	37.5938	19	37.5938	36	37.5938	30	37.5938	33
37.6132	24	37.6132	38	37.6132	36	37.6132	42	37.6132	23	37.6132	36	37.6132	22	37.6132	39	37.6132	33	37.6132	47	37.6132	32	37.6132	29	37.6132	41	37.6132	35	37.6132	34
37.6327	32	37.6327	29	37.6327	40	37.6327	36	37.6327	31	37.6327	30	37.6327	27	37.6327	22	37.6327	34	37.6327	41	37.6327	32	37.6327	23	37.6327	39	37.6327	28	37.6327	39
37.6522	18	37.6522	38	37.6522	28	37.6522	33	37.6522	24	37.6522	28	37.6522	33	37.6522	39	37.6522	30	37.6522	45	37.6522	30	37.6522	26	37.6522	41	37.6522	25	37.6522	29
37.6717	29	37.6717	41	37.6717	32	37.6717	30	37.6717	21	37.6717	31	37.6717	28	37.6717	41	37.6717	36	37.6717	37	37.6717	41	37.6717	35	37.6717	41	37.6717	32	37.6717	43
37.6912	26	37.6912	47	37.6912	31	37.6912	38	37.6912	23	37.6912	35	37.6912	31	37.6912	32	37.6912	35	37.6912	28	37.6912	33	37.6912	21	37.6912	35	37.6912	38	37.6912	31
37.7107	30	37.7107	36	37.7107	28	37.7107	43	37.7107	47	37.7107	28	37.7107	29	37.7107	45	37.7107	38	37.7107	40	37.7107	21	37.7107	19	37.7107	31	37.7107	36	37.7107	36
37.7302	26	37.7302	40	37.7302	34	37.7302	41	37.7302	35	37.7302	26	37.7302	35	37.7302	41	37.7302	32	37.7302	33	37.7302	42	37.7302	22	37.7302	33	37.7302	25	37.7302	53
37.7497	24	37.7497	41	37.7497	31	37.7497	31	37.7497	25	37.7497	33	37.7497	21	37.7497	30	37.7497	33	37.7497	50	37.7497	39	37.7497	23	37.7497	35	37.7497	40	37.7497	46
37.7692	22	37.7692	45	37.7692	32	37.7692	34	37.7692	30	37.7692	31	37.7692	33	37.7692	42	37.7692	32	37.7692	44	37.7692	25	37.7692	27	37.7692	31	37.7692	31	37.7692	42
37.7886	26	37.7886	33	37.7886	36	37.7886	31	37.7886	22	37.7886	29	37.7886	30	37.7886	21	37.7886	36	37.7886	41	37.7886	28	37.7886	20	37.7886	38	37.7886	36	37.7886	42
37.8081	35	37.8081	33	37.8081	30	37.8081	22	37.8081	25	37.8081	30	37.8081	24	37.8081	36	37.8081	35	37.8081	30	37.8081	28	37.8081	24	37.8081	45	37.8081	34	37.8081	32
37.8276	20	37.8276	36	37.8276	23	37.8276	36	37.8276	21	37.8276	41	37.8276	37	37.8276	26	37.8276	43	37.8276	41	37.8276	37	37.8276	21	37.8276	36	37.8276	38	37.8276	38
37.8471	30	37.8471	42	37.8471	30	37.8471	34	37.8471	32	37.8471	30	37.8471	20	37.8471	39	37.8471	45	37.8471	49	37.8471	27	37.8471	18	37.8471	21	37.8471	38	37.8471	39
37.8666	22	37.8666	37	37.8666	32	37.8666	32	37.8666	20	37.8666	30	37.8666	19	37.8666	31	37.8666	32	37.8666	26	37.8666	38	37.8666	24	37.8666	38	37.8666	37	37.8666	40
37.8861	35	37.8861	35	37.8861	24	37.8861	42	37.8861	23	37.8861	25	37.8861	29	37.8861	38	37.8861	33	37.8861	34	37.8861	33	37.8861	20	37.8861	44	37.8861	33	37.8861	37
37.9056	29	37.9056	41	37.9056	24	37.9056	31	37.9056	27	37.9056	23	37.9056	21	37.9056	28	37.9056	38	37.9056	41	37.9056	30	37.9056	16	37.9056	45	37.9056	32	37.9056	48
37.9251	20	37.9251	28	37.9251	34	37.9251	31	37.9251	25	37.9251	25	37.9251	25	37.9251	28	37.9251	43	37.9251	36	37.9251	24	37.9251	25	37.9251	41	37.9251	38	37.9251	28
37.9446	19	37.9446	27	37.9446	37	37.9446	32	37.9446	23	37.9446	21	37.9446	42	37.9446	31	37.9446	26	37.9446	38	37.9446	30	37.9446	24	37.9446	36	37.9446	36	37.9446	35
37.9641	28	37.9641	36	37.9641	33	37.9641	32	37.9641	33	37.9641	25	37.9641	35	37.9641	47	37.9641	36	37.9641	49	37.9641	32	37.9641	25	37.9641	35	37.9641	32	37.9641	42
37.9835	28	37.9835	36	37.9835	32	37.9835	42	37.9835	23	37.9835	29	37.9835	31	37.9835	34	37.9835	35	37.9835	43	37.9835	30	37.9835	28	37.9835	40	37.9835	28	37.9835	31
38.003	24	38.003	34	38.003	22	38.003	24	38.003	25	38.003	28	38.003	31	38.003	37	38.003	23	38.003	40	38.003	37	38.003	24	38.003	47	38.003	37	38.003	21
38.0225	35	38.0225	28	38.0225	32	38.0225	43	38.0225	23	38.0225	32	38.0225	33	38.0225	34	38.0225	40	38.0225	40	38.0225	41	38.0225	23	38.0225	34	38.0225	29	38.0225	46
38.042	25	38.042	41	38.042	36	38.042	39	38.042	29	38.042	28	38.042	23	38.042	31	38.042	37	38.042	35	38.042	31	38.042	26	38.042	23	38.042	25	38.042	43
38.0615	35	38.0615	43	38.0615	30	38.0615	34	38.0615	27	38.0615	30	38.0615	36	38.0615	35	38.0615	32	38.0615	28	38.0615	30	38.0615	29	38.0615	39	38.0615	41	38.0615	46
38.081	27	38.081	39	38.081	32	38.081	26	38.081	22	38.081	36	38.081	21	38.081	32	38.081	42	38.081	38	38.081	28	38.081	28	38.081	45	38.081	30	38.081	48
38.1005	25	38.1005	46	38.1005	27	38.1005	37	38.1005	20	38.1005	28	38.1005	22	38.1005	25	38.1005	33	38.1005	37	38.1005	29	38.1005	32	38.1005	24	38.1005	29	38.1005	35
38.12	36	38.12	36	38.12	35	38.12	30	38.12	32	38.12	32	38.12	28	38.12	22	38.12	34	38.12	37	38.12	45	38.12	28	38.12	35	38.12	37	38.12	41
38.1394	25	38.1394	36	38.1394	33	38.1394	45	38.1394	25	38.1394	34	38.1394	30	38.1394	36	38.1394	29	38.1394	48	38.1394	22	38.1394	20	38.1394	40	38.1394	47	38.1394	40
38.1589	16	38.1589	41	38.1589	30	38.1589	33	38.1589	17	38.1589	12	38.1589	39	38.1589	38	38.1589	28	38.1589	42	38.1589	24	38.1589	23	38.1589	44	38.1589	26	38.1589	40
38.1784	26	38.1784	50	38.1784	29	38.1784	42	38.1784	26	38.1784	33	38.1784	34	38.1784	35	38.1784	36	38.1784	33	38.1784	27	38.1784	30	38.1784	38	38.1784	36	38.1784	24
38.1979	36	38.1979	35	38.1979	39	38.1979	34	38.1979	22	38.1979	29	38.1979	30	38.1979	33	38.1979	33	38.1979	51	38.1979	28	38.1979	24	38.1979	38	38.1979	33	38.1979	40
38.2174	25	38.2174	35	38.2174	38	38.2174	46	38.2174	30	38.2174	24	38.2174	34	38.2174	32	38.2174	42	38.2174	32	38.2174	35	38.2174	29	38.2174	43	38.2174	29	38.2174	27
38.2369	31	38.2369	36	38.2369	37	38.2369	33	38.2369	20	38.2369	34	38.2369	25	38.2369	30	38.2369	29	38.2369	44	38.2369	33	38.2369	19	38.2369	24	38.2369	35	38.2369	30
38.2564	21	38.2564	54	38.2564	35	38.2564	37	38.2564	33	38.2564	31	38.2564	32	38.2564	39	38.2564	33	38.2564	38	38.2564	28	38.2564	24	38.2564	43	38.2564	41	38.2564	46
38.2759	21	38.2759	46	38.2759	27	38.2759	48	38.2759	20	38.2759	24	38.2759	38	38.2759	31	38.2759	30	38.2759	48	38.2759	38	38.2759	23	38.2759	34	38.2759	26	38.2759	32
38.2954	26	38.2954	35	38.2954	39	38.2954	36	38.2954	31	38.2954	26	38.2954	28	38.2954	42	38.2954	42	38.2954	50	38.2954	28	38.2954	22	38.2954	42	38.2954	30	38.2954	32
38.3149	27	38.3149	34	38.3149	45	38.3149	35	38.3149	24	38.3149	27	38.3149	30	38.3149	35	38.3149	31	38.3149	39	38.3149	26	38.3149	31	38.3149	37	38.3149	32	38.3149	44
38.3344	23	38.3344	43	38.3344	22	38.3344	36	38.3344	20	38.3344	40	38.3344	40	38.3344	33	38.3344	29	38.3344	35	38.3344	37	38.3344	23	38.3344	37	38.3344	21	38.3344	34
38.3538	21	38.3538	37	38.3538	27	38.3538	25	38.3538	32	38.3538	32	38.3538	37	38.3538	36	38.3538	37	38.3538	35	38.3538	30	38.3538	25	38.3538	36	38.3538	28	38.3538	29
38.3733	25	38.3733	44	38.3733	33	38.3733	41	38.3733	22	38.3733	38	38.3733	32	38.3733	38	38.3733	44	38.3733	45	38.3733	39	38.3733	27	38.3733	33	38.3733	28	38.3733	51
38.3928	22	38.3928	35	38.3928	33	38.3928	37	38.3928	22	38.3928	31	38.3928	30	38.3928	45	38.3928	45	38.3928	44	38.3928	28	38.3928	30	38.3928	35	38.3928	36	38.3928	42
38.4123	27	38.4123	49	38.4123	34	38.4123	35	38.4123	30	38.4123	35	38.4123	32	38.4123	42	38.4123	42	38.4123	35	38.4123	39	38.4123	18	38.4123	40	38.4123	52	38.4123	32
38.4318	25	38.4318	34	38.4318	40	38.4318	43	38.4318	28	38.4318	33	38.4318	38	38.4318	23	38.4318	31	38.4318	42	38.4318	32	38.4318	27	38.4318	36	38.4318	38	38.4318	37
38.4513	30	38.4513	46	38.4513	29	38.4513	47	38.4513	38	38.4513	38	38.4513	28	38.4513	34	38.4513	41	38.4513	50	38.4513	43	38.4513	20	38.4513	42	38.4513	33	38.4513	40
38.4708	31	38.4708	40	38.4708	42	38.4708	32	38.4708	25	38.4708	34	38.4708	25	38.4708	43	38.4708	38	38.4708	44	38.4708	40	38.4708	20	38.4708	36	38.4708	46	38.4708	42
38.4903	31	38.4903	33	38.4903	43	38.4903	48	38.4903	37	38.4903	36	38.4903	25	38.4903	41	38.4903	40	38.4903	44	38.4903	36	38.4903	31	38.4903	40	38.4903	34	38.4903	32
38.5097	26	38.5097	40	38.5097	39	38.5097	33	38.5097	34	38.5097	29	38.5097	33	38.5097	25	38.5097	49	38.5097	35	38.5097	33	38.5097	16	38.5097	40	38.5097	36	38.5097	44
38.5292	28	38.5292	48	38.5292	36	38.5292	28	38.5292	30	38.5292	36	38.5292	36	38.5292	42	38.5292	48	38.5292	37	38.5292	35	38.5292	18	38.5292	30	38.5292	37	38.5292	49
38.5487	29	38.5487	37	38.5487	24	38.5487	39	38.5487	27	38.5487	27	38.5487	29	38.5487	22	38.5487	38	38.5487	36	38.5487	37	38.5487	18	38.5487	39	38.5487	30	38.5487	44
38.5682	38	38.5682	47	38.5682	33	38.5682	38	38.5682	34	38.5682	33	38.5682	22	38.5682	37	38.5682	31	38.5682	39	38.5682	37	38.5682	24	38.5682	34	38.5682	30	38.5682	41
38.5877	21	38.5877	35	38.5877	33	38.5877	47	38.5877	31	38.5877	37	38.5877	23	38.5877	35	38.5877	40	38.5877	33	38.5877	52	38.5877	16	38.5877	26	38.5877	47	38.5877	40
38.6072	38	38.6072	29	38.6072	35	38.6072	41	38.6072	36	38.6072	42	38.6072	37	38.6072	31	38.6072	43	38.6072	50	38.6072	40	38.6072	16	38.6072	36	38.6072	30	38.6072	36
38.6267	26	38.6267	46	38.6267	33	38.6267	38	38.6267	25	38.6267	33	38.6267	36	38.6267	27	38.6267	37	38.6267	55	38.6267	35	38.6267	22	38.6267	43	38.6267	30	38.6267	44
38.6462	24	38.6462	38	38.6462	34	38.6462	35	38.6462	33	38.6462	34	38.6462	29	38.6462	25	38.6462	42	38.6462	35	38.6462	30	38.6462	19	38.6462	48	38.6462	41	38.6462	34
38.6657	35	38.6657	45	38.6657	34	38.6657	40	38.6657	34	38.6657	37	38.6657	33	38.6657	26	38.6657	46	38.6657	32	38.6657	40	38.6657	24	38.6657	38	38.6657	33	38.6657	32
38.6852	36	38.6852	35	38.6852	35	38.6852	30	38.6852	36	38.6852	32	38.6852	36	38.6852	36	38.6852	36	38.6852	38	38.6852	40	38.6852	16	38.6852	44	38.6852	40	38.6852	36
38.7047	26	38.7047	46	38.7047	40	38.7047	36	38.7047	32	38.7047	39	38.7047	40	38.7047	37	38.7047	34	38.7047	34	38.7047	34	38.7047	21	38.7047	39	38.7047	26	38.7047	44
38.7241	23	38.7241	40	38.7241	40	38.7241	44	38.7241	44	38.7241	30	38.7241	27	38.7241	31	38.7241	36	38.7241	42	38.7241	26	38.7241	22	38.7241	43	38.7241	33	38.7241	36
38.7436	36	38.7436	44	38.7436	32	38.7436	37	38.7436	31	38.7436	33	38.7436	29	38.7436	47	38.7436	44	38.7436	49	38.7436	40	38.7436	31	38.7436	39	38.7436	44	38.7436	37
38.7631	33	38.7631	47	38.7631	25	38.7631	38	38.7631	40	38.7631	35	38.7631	44	38.7631	35	38.7631	52	38.7631	47	38.7631	44	38.7631	24	38.7631	33	38.7631	42	38.7631	42
38.7826	30	38.7826	47	38.7826	41	38.7826	50	38.7826	27	38.7826	33	38.7826	45	38.7826	41	38.7826	39	38.7826	46	38.7826	31	38.7826	20	38.7826	34	38.7826	31	38.7826	34
38.8021	31	38.8021	53	38.8021	37	38.8021	36	38.8021	40	38.8021	41	38.8021	39	38.8021	35	38.8021	44	38.8021	44	38.8021	39	38.8021	23	38.8021	49	38.8021	33	38.8021	40
38.8216	29	38.8216	55	38.8216	33	38.8216	38	38.8216	41	38.8216	31	38.8216	39	38.8216	47	38.8216	53	38.8216	30	38.8216	46	38.8216	18	38.8216	45	38.8216	44	38.8216	51
38.8411	37	38.8411	30	38.8411	41	38.8411	51	38.8411	34	38.8411	29	38.8411	43	38.8411	41	38.8411	43	38.8411	42	38.8411	43	38.8411	32	38.8411	37	38.8411	37	38.8411	47
38.8606	29	38.8606	44	38.8606	34	38.8606	40	38.8606	38	38.8606	32	38.8606	39	38.8606	40	38.8606	37	38.8606	39	38.8606	35	38.8606	32	38.8606	50	38.8606	46	38.8606	37
38.88	27	38.88	40	38.88	35	38.88	48	38.88	43	38.88	34	38.88	40	38.88	47	38.88	44	38.88	54	38.88	39	38.88	27	38.88	59	38.88	39	38.88	39
38.8995	44	38.8995	46	38.8995	36	38.8995	48	38.8995	30	38.8995	41	38.8995	31	38.8995	30	38.8995	37	38.8995	54	38.8995	42	38.8995	25	38.8995	44	38.8995	34	38.8995	41
38.919	37	38.919	53	38.919	28	38.919	44	38.919	39	38.919	43	38.919	40	38.919	45	38.919	31	38.919	54	38.919	30	38.919	30	38.919	39	38.919	49	38.919	39
38.9385	30	38.9385	37	38.9385	35	38.9385	54	38.9385	36	38.9385	38	38.9385	34	38.9385	42	38.9385	36	38.9385	62	38.9385	39	38.9385	25	38.9385	54	38.9385	52	38.9385	48
38.958	44	38.958	46	38.958	45	38.958	64	38.958	46	38.958	50	38.958	44	38.958	40	38.958	55	38.958	55	38.958	44	38.958	31	38.958	44	38.958	42	38.958	52
38.9775	40	38.9775	61	38.9775	44	38.9775	60	38.9775	42	38.9775	36	38.9775	49	38.9775	42	38.9775	48	38.9775	57	38.9775	44	38.9775	29	38.9775	40	38.9775	52	38.9775	49
38.997	50	38.997	51	38.997	41	38.997	53	38.997	38	38.997	31	38.997	36	38.997	43	38.997	47	38.997	50	38.997	53	38.997	37	38.997	49	38.997	52	38.997	52
39.0165	46	39.0165	53	39.0165	47	39.0165	52	39.0165	29	39.0165	40	39.0165	36	39.0165	38	39.0165	39	39.0165	60	39.0165	29	39.0165	36	39.0165	48	39.0165	57	39.0165	49
39.036	39	39.036	40	39.036	25	39.036	69	39.036	58	39.036	52	39.036	54	39.036	38	39.036	45	39.036	49	39.036	55	39.036	41	39.036	55	39.036	48	39.036	56
39.0555	43	39.0555	44	39.0555	47	39.0555	44	39.0555	41	39.0555	41	39.0555	46	39.0555	42	39.0555	53	39.0555	65	39.0555	33	39.0555	34	39.0555	62	39.0555	48	39.0555	59
39.0749	46	39.0749	55	39.0749	46	39.0749	58	39.0749	45	39.0749	56	39.0749	42	39.0749	49	39.0749	54	39.0749	56	39.0749	64	39.0749	42	39.0749	58	39.0749	63	39.0749	43
39.0944	45	39.0944	42	39.0944	55	39.0944	71	39.0944	45	39.0944	50	39.0944	59	39.0944	49	39.0944	56	39.0944	52	39.0944	42	39.0944	32	39.0944	57	39.0944	41	39.0944	69
39.1139	56	39.1139	53	39.1139	36	39.1139	57	39.1139	55	39.1139	42	39.1139	59	39.1139	39	39.1139	57	39.1139	56	39.1139	44	39.1139	53	39.1139	66	39.1139	49	39.1139	61
39.1334	58	39.1334	64	39.1334	51	39.1334	55	39.1334	51	39.1334	59	39.1334	39	39.1334	53	39.1334	60	39.1334	54	39.1334	54	39.1334	54	39.1334	57	39.1334	38	39.1334	69
39.1529	59	39.1529	45	39.1529	53	39.1529	56	39.1529	61	39.1529	48	39.1529	46	39.1529	43	39.1529	50	39.1529	73	39.1529	56	39.1529	66	39.1529	51	39.1529	52	39.1529	73
39.1724	59	39.1724	74	39.1724	54	39.1724	66	39.1724	61	39.1724	50	39.1724	38	39.1724	60	39.1724	60	39.1724	68	39.1724	75	39.1724	53	39.1724	48	39.1724	74	39.1724	53
39.1919	65	39.1919	76	39.1919	62	39.1919	65	39.1919	48	39.1919	54	39.1919	44	39.1919	58	39.1919	57	39.1919	69	39.1919	57	39.1919	71	39.1919	71	39.1919	69	39.1919	55
39.2114	67	39.2114	71	39.2114	64	39.2114	63	39.2114	60	39.2114	48	39.2114	45	39.2114	65	39.2114	51	39.2114	50	39.2114	51	39.2114	84	39.2114	54	39.2114	63	39.2114	56
39.2309	55	39.2309	64	39.2309	45	39.2309	62	39.2309	64	39.2309	56	39.2309	45	39.2309	61	39.2309	66	39.2309	68	39.2309	50	39.2309	69	39.2309	74	39.2309	66	39.2309	74
39.2503	55	39.2503	70	39.2503	61	39.2503	58	39.2503	68	39.2503	68	39.2503	38	39.2503	50	39.2503	64	39.2503	63	39.2503	68	39.2503	71	39.2503	44	39.2503	70	39.2503	75
39.2698	64	39.2698	47	39.2698	55	39.2698	68	39.2698	57	39.2698	43	39.2698	50	39.2698	61	39.2698	65	39.2698	60	39.2698	67	39.2698	53	39.2698	60	39.2698	62	39.2698	70
39.2893	88	39.2893	55	39.2893	51	39.2893	76	39.2893	72	39.2893	58	39.2893	53	39.2893	51	39.2893	60	39.2893	65	39.2893	54	39.2893	60	39.2893	71	39.2893	60	39.2893	78
39.3088	64	39.3088	65	39.3088	60	39.3088	85	39.3088	65	39.3088	58	39.3088	55	39.3088	57	39.3088	56	39.3088	70	39.3088	62	39.3088	60	39.3088	69	39.3088	66	39.3088	71
39.3283	58	39.3283	64	39.3283	46	39.3283	71	39.3283	55	39.3283	68	39.3283	50	39.3283	52	39.3283	68	39.3283	60	39.3283	70	39.3283	46	39.3283	59	39.3283	55	39.3283	63
39.3478	59	39.3478	75	39.3478	55	39.3478	72	39.3478	76	39.3478	60	39.3478	64	39.3478	64	39.3478	50	39.3478	90	39.3478	58	39.3478	62	39.3478	62	39.3478	63	39.3478	60
39.3673	63	39.3673	52	39.3673	71	39.3673	77	39.3673	76	39.3673	60	39.3673	54	39.3673	46	39.3673	66	39.3673	70	39.3673	56	39.3673	43	39.3673	60	39.3673	65	39.3673	58
39.3868	83	39.3868	68	39.3868	59	39.3868	96	39.3868	83	39.3868	66	39.3868	57	39.3868	64	39.3868	72	39.3868	69	39.3868	64	39.3868	47	39.3868	73	39.3868	65	39.3868	61
39.4063	84	39.4063	59	39.4063	68	39.4063	92	39.4063	74	39.4063	59	39.4063	60	39.4063	71	39.4063	52	39.4063	62	39.4063	64	39.4063	38	39.4063	61	39.4063	66	39.4063	65
39.4258	73	39.4258	88	39.4258	67	39.4258	78	39.4258	86	39.4258	76	39.4258	58	39.4258	56	39.4258	62	39.4258	63	39.4258	63	39.4258	50	39.4258	95	39.4258	64	39.4258	72
39.4452	82	39.4452	78	39.4452	58	39.4452	78	39.4452	89	39.4452	59	39.4452	68	39.4452	54	39.4452	77	39.4452	89	39.4452	72	39.4452	42	39.4452	88	39.4452	66	39.4452	81
39.4647	78	39.4647	77	39.4647	72	39.4647	73	39.4647	101	39.4647	61	39.4647	67	39.4647	66	39.4647	65	39.4647	82	39.4647	77	39.4647	58	39.4647	80	39.4647	81	39.4647	85
39.4842	74	39.4842	73	39.4842	52	39.4842	80	39.4842	83	39.4842	58	39.4842	59	39.4842	61	39.4842	76	39.4842	74	39.4842	73	39.4842	49	39.4842	71	39.4842	82	39.4842	71
39.5037	83	39.5037	61	39.5037	55	39.5037	86	39.5037	83	39.5037	76	39.5037	55	39.5037	70	39.5037	65	39.5037	73	39.5037	67	39.5037	56	39.5037	91	39.5037	69	39.5037	80
39.5232	94	39.5232	74	39.5232	67	39.5232	93	39.5232	81	39.5232	68	39.5232	64	39.5232	57	39.5232	70	39.5232	88	39.5232	73	39.5232	40	39.5232	62	39.5232	81	39.5232	66
39.5427	82	39.5427	86	39.5427	65	39.5427	73	39.5427	90	39.5427	66	39.5427	65	39.5427	61	39.5427	72	39.5427	97	39.5427	75	39.5427	53	39.5427	96	39.5427	80	39.5427	96
39.5622	86	39.5622	74	39.5622	41	39.5622	74	39.5622	59	39.5622	65	39.5622	65	39.5622	60	39.5622	60	39.5622	76	39.5622	71	39.5622	58	39.5622	84	39.5622	71	39.5622	75
39.5817	111	39.5817	82	39.5817	62	39.5817	85	39.5817	91	39.5817	62	39.5817	69	39.5817	67	39.5817	58	39.5817	78	39.5817	88	39.5817	55	39.5817	74	39.5817	93	39.5817	81
39.6012	94	39.6012	93	39.6012	69	39.6012	82	39.6012	78	39.6012	92	39.6012	66	39.6012	51	39.6012	65	39.6012	83	39.6012	76	39.6012	72	39.6012	94	39.6012	98	39.6012	79
39.6206	93	39.6206	73	39.6206	60	39.6206	86	39.6206	104	39.6206	79	39.6206	57	39.6206	61	39.6206	74	39.6206	99	39.6206	70	39.6206	73	39.6206	77	39.6206	89	39.6206	77
39.6401	101	39.6401	99	39.6401	70	39.6401	89	39.6401	101	39.6401	82	39.6401	64	39.6401	77	39.6401	78	39.6401	117	39.6401	88	39.6401	80	39.6401	99	39.6401	103	39.6401	85
39.6596	100	39.6596	81	39.6596	68	39.6596	102	39.6596	86	39.6596	98	39.6596	69	39.6596	69	39.6596	86	39.6596	87	39.6596	97	39.6596	89	39.6596	97	39.6596	99	39.6596	87
39.6791	94	39.6791	88	39.6791	76	39.6791	80	39.6791	102	39.6791	77	39.6791	78	39.6791	82	39.6791	83	39.6791	104	39.6791	89	39.6791	106	39.6791	91	39.6791	96	39.6791	88
39.6986	105	39.6986	83	39.6986	80	39.6986	85	39.6986	104	39.6986	95	39.6986	74	39.6986	71	39.6986	104	39.6986	103	39.6986	106	39.6986	125	39.6986	104	39.6986	104	39.6986	87
39.7181	95	39.7181	101	39.7181	59	39.7181	80	39.7181	116	39.7181	84	39.7181	79	39.7181	96	39.7181	105	39.7181	100	39.7181	95	39.7181	107	39.7181	89	39.7181	114	39.7181	91
39.7376	125	39.7376	70	39.7376	96	39.7376	94	39.7376	102	39.7376	82	39.7376	71	39.7376	88	39.7376	105	39.7376	99	39.7376	93	39.7376	143	39.7376	107	39.7376	115	39.7376	111
39.7571	89	39.7571	96	39.7571	108	39.7571	105	39.7571	94	39.7571	95	39.7571	86	39.7571	66	39.7571	103	39.7571	124	39.7571	101	39.7571	173	39.7571	101	39.7571	93	39.7571	104
39.7766	125	39.7766	90	39.7766	104	39.7766	77	39.7766	119	39.7766	89	39.7766	79	39.7766	82	39.7766	97	39.7766	113	39.7766	106	39.7766	202	39.7766	103	39.7766	99	39.7766	103
39.7961	128	39.7961	97	39.7961	117	39.7961	106	39.7961	125	39.7961	90	39.7961	85	39.7961	75	39.7961	98	39.7961	80	39.7961	104	39.7961	201	39.7961	107	39.7961	107	39.7961	108
39.8155	125	39.8155	81	39.8155	114	39.8155	114	39.8155	95	39.8155	109	39.8155	83	39.8155	92	39.8155	95	39.8155	107	39.8155	105	39.8155	196	39.8155	105	39.8155	119	39.8155	100
39.835	119	39.835	71	39.835	78	39.835	101	39.835	127	39.835	98	39.835	74	39.835	88	39.835	99	39.835	103	39.835	117	39.835	209	39.835	77	39.835	99	39.835	114
39.8545	98	39.8545	85	39.8545	110	39.8545	91	39.8545	100	39.8545	86	39.8545	78	39.8545	85	39.8545	109	39.8545	98	39.8545	110	39.8545	196	39.8545	125	39.8545	128	39.8545	95
39.874	106	39.874	83	39.874	125	39.874	91	39.874	99	39.874	103	39.874	81	39.874	81	39.874	127	39.874	107	39.874	100	39.874	177	39.874	87	39.874	102	39.874	118
39.8935	118	39.8935	88	39.8935	117	39.8935	95	39.8935	111	39.8935	107	39.8935	82	39.8935	81	39.8935	95	39.8935	99	39.8935	84	39.8935	148	39.8935	127	39.8935	114	39.8935	127
39.913	93	39.913	98	39.913	93	39.913	105	39.913	105	39.913	94	39.913	72	39.913	95	39.913	95	39.913	101	39.913	103	39.913	145	39.913	95	39.913	98	39.913	96
39.9325	100	39.9325	88	39.9325	104	39.9325	76	39.9325	98	39.9325	87	39.9325	73	39.9325	82	39.9325	99	39.9325	76	39.9325	128	39.9325	145	39.9325	102	39.9325	101	39.9325	94
39.952	77	39.952	88	39.952	103	39.952	88	39.952	80	39.952	94	39.952	78	39.952	77	39.952	83	39.952	102	39.952	108	39.952	115	39.952	98	39.952	128	39.952	83
39.9714	96	39.9714	74	39.9714	119	39.9714	93	39.9714	83	39.9714	104	39.9714	65	39.9714	91	39.9714	110	39.9714	75	39.9714	98	39.9714	116	39.9714	88	39.9714	105	39.9714	81
39.9909	74	39.9909	83	39.9909	107	39.9909	84	39.9909	100	39.9909	101	39.9909	91	39.9909	81	39.9909	86	39.9909	65	39.9909	94	39.9909	76	39.9909	94	39.9909	88	39.9909	92
40.0104	99	40.0104	79	40.0104	97	40.0104	67	40.0104	68	40.0104	86	40.0104	84	40.0104	71	40.0104	89	40.0104	64	40.0104	103	40.0104	73	40.0104	110	40.0104	106	40.0104	82
40.0299	94	40.0299	67	40.0299	96	40.0299	74	40.0299	71	40.0299	93	40.0299	75	40.0299	67	40.0299	87	40.0299	89	40.0299	82	40.0299	58	40.0299	74	40.0299	92	40.0299	74
40.0494	83	40.0494	78	40.0494	82	40.0494	66	40.0494	78	40.0494	83	40.0494	72	40.0494	57	40.0494	81	40.0494	82	40.0494	83	40.0494	57	40.0494	86	40.0494	75	40.0494	89
40.0689	79	40.0689	85	40.0689	96	40.0689	75	40.0689	72	40.0689	85	40.0689	62	40.0689	79	40.0689	80	40.0689	78	40.0689	86	40.0689	57	40.0689	83	40.0689	85	40.0689	82
40.0884	81	40.0884	63	40.0884	74	40.0884	67	40.0884	60	40.0884	80	40.0884	71	40.0884	88	40.0884	75	40.0884	88	40.0884	88	40.0884	49	40.0884	87	40.0884	97	40.0884	75
40.1079	75	40.1079	75	40.1079	78	40.1079	64	40.1079	71	40.1079	68	40.1079	59	40.1079	69	40.1079	74	40.1079	63	40.1079	69	40.1079	50	40.1079	74	40.1079	66	40.1079	81
40.1274	72	40.1274	63	40.1274	79	40.1274	65	40.1274	62	40.1274	65	40.1274	76	40.1274	65	40.1274	82	40.1274	57	40.1274	65	40.1274	46	40.1274	62	40.1274	74	40.1274	71
40.1469	61	40.1469	76	40.1469	58	40.1469	63	40.1469	54	40.1469	80	40.1469	71	40.1469	57	40.1469	67	40.1469	65	40.1469	64	40.1469	47	40.1469	68	40.1469	87	40.1469	69
40.1664	52	40.1664	55	40.1664	80	40.1664	59	40.1664	54	40.1664	72	40.1664	45	40.1664	56	40.1664	64	40.1664	44	40.1664	65	40.1664	32	40.1664	76	40.1664	71	40.1664	72
40.1858	55	40.1858	58	40.1858	60	40.1858	72	40.1858	56	40.1858	60	40.1858	64	40.1858	53	40.1858	87	40.1858	61	40.1858	58	40.1858	33	40.1858	78	40.1858	73	40.1858	64
40.2053	51	40.2053	82	40.2053	60	40.2053	63	40.2053	42	40.2053	64	40.2053	56	40.2053	76	40.2053	68	40.2053	80	40.2053	63	40.2053	42	40.2053	72	40.2053	67	40.2053	56
40.2248	49	40.2248	54	40.2248	63	40.2248	53	40.2248	55	40.2248	62	40.2248	52	40.2248	49	40.2248	54	40.2248	75	40.2248	47	40.2248	33	40.2248	56	40.2248	85	40.2248	79
40.2443	47	40.2443	54	40.2443	48	40.2443	65	40.2443	46	40.2443	62	40.2443	53	40.2443	50	40.2443	68	40.2443	67	40.2443	64	40.2443	32	40.2443	62	40.2443	68	40.2443	67
40.2638	63	40.2638	56	40.2638	45	40.2638	53	40.2638	34	40.2638	61	40.2638	34	40.2638	70	40.2638	50	40.2638	61	40.2638	42	40.2638	26	40.2638	52	40.2638	66	40.2638	73
40.2833	56	40.2833	62	40.2833	61	40.2833	40	40.2833	46	40.2833	61	40.2833	44	40.2833	41	40.2833	63	40.2833	47	40.2833	71	40.2833	39	40.2833	67	40.2833	68	40.2833	60
40.3028	44	40.3028	49	40.3028	49	40.3028	61	40.3028	53	40.3028	44	40.3028	56	40.3028	62	40.3028	61	40.3028	56	40.3028	56	40.3028	31	40.3028	45	40.3028	54	40.3028	54
40.3223	20	40.3223	53	40.3223	57	40.3223	54	40.3223	43	40.3223	50	40.3223	52	40.3223	36	40.3223	55	40.3223	54	40.3223	42	40.3223	40	40.3223	46	40.3223	58	40.3223	55
40.3417	45	40.3417	53	40.3417	69	40.3417	52	40.3417	41	40.3417	60	40.3417	46	40.3417	34	40.3417	56	40.3417	39	40.3417	49	40.3417	36	40.3417	44	40.3417	50	40.3417	59
40.3612	51	40.3612	56	40.3612	49	40.3612	55	40.3612	41	40.3612	54	40.3612	34	40.3612	50	40.3612	56	40.3612	46	40.3612	62	40.3612	38	40.3612	63	40.3612	42	40.3612	57
40.3807	48	40.3807	54	40.3807	47	40.3807	57	40.3807	44	40.3807	52	40.3807	55	40.3807	58	40.3807	64	40.3807	55	40.3807	44	40.3807	35	40.3807	55	40.3807	59	40.3807	49
40.4002	40	40.4002	71	40.4002	63	40.4002	46	40.4002	41	40.4002	53	40.4002	35	40.4002	52	40.4002	47	40.4002	60	40.4002	45	40.4002	33	40.4002	60	40.4002	56	40.4002	55
40.4197	43	40.4197	65	40.4197	43	40.4197	47	40.4197	34	40.4197	47	40.4197	47	40.4197	61	40.4197	52	40.4197	44	40.4197	45	40.4197	36	40.4197	55	40.4197	39	40.4197	62
40.4392	37	40.4392	49	40.4392	44	40.4392	49	40.4392	47	40.4392	50	40.4392	44	40.4392	41	40.4392	48	40.4392	48	40.4392	40	40.4392	33	40.4392	52	40.4392	35	40.4392	46
40.4587	35	40.4587	52	40.4587	46	40.4587	56	40.4587	40	40.4587	51	40.4587	43	40.4587	51	40.4587	53	40.4587	57	40.4587	57	40.4587	34	40.4587	58	40.4587	48	40.4587	48
40.4782	41	40.4782	48	40.4782	54	40.4782	51	40.4782	36	40.4782	39	40.4782	49	40.4782	47	40.4782	42	40.4782	50	40.4782	51	40.4782	29	40.4782	45	40.4782	38	40.4782	56
40.4977	32	40.4977	46	40.4977	52	40.4977	59	40.4977	33	40.4977	36	40.4977	42	40.4977	42	40.4977	58	40.4977	52	40.4977	55	40.4977	29	40.4977	53	40.4977	54	40.4977	53
40.5172	35	40.5172	50	40.5172	39	40.5172	45	40.5172	40	40.5172	39	40.5172	47	40.5172	44	40.5172	44	40.5172	59	40.5172	38	40.5172	31	40.5172	61	40.5172	41	40.5172	38
40.5367	28	40.5367	38	40.5367	33	40.5367	45	40.5367	32	40.5367	38	40.5367	44	40.5367	37	40.5367	48	40.5367	44	40.5367	48	40.5367	30	40.5367	40	40.5367	38	40.5367	48
40.5561	37	40.5561	47	40.5561	45	40.5561	45	40.5561	34	40.5561	48	40.5561	40	40.5561	50	40.5561	42	40.5561	49	40.5561	41	40.5561	29	40.5561	40	40.5561	51	40.5561	39
40.5756	32	40.5756	37	40.5756	30	40.5756	41	40.5756	24	40.5756	36	40.5756	46	40.5756	49	40.5756	41	40.5756	51	40.5756	32	40.5756	32	40.5756	51	40.5756	39	40.5756	52
40.5951	30	40.5951	43	40.5951	42	40.5951	41	40.5951	28	40.5951	54	40.5951	46	40.5951	50	40.5951	43	40.5951	59	40.5951	51	40.5951	42	40.5951	41	40.5951	40	40.5951	44
40.6146	28	40.6146	48	40.6146	35	40.6146	36	40.6146	27	40.6146	41	40.6146	39	40.6146	39	40.6146	47	40.6146	47	40.6146	44	40.6146	35	40.6146	52	40.6146	50	40.6146	54
40.6341	39	40.6341	47	40.6341	41	40.6341	53	40.6341	34	40.6341	46	40.6341	29	40.6341	30	40.6341	52	40.6341	50	40.6341	32	40.6341	31	40.6341	40	40.6341	44	40.6341	54
40.6536	38	40.6536	52	40.6536	51	40.6536	41	40.6536	31	40.6536	39	40.6536	30	40.6536	37	40.6536	50	40.6536	47	40.6536	44	40.6536	30	40.6536	38	40.6536	40	40.6536	44
40.6731	28	40.6731	43	40.6731	39	40.6731	51	40.6731	37	40.6731	39	40.6731	38	40.6731	50	40.6731	33	40.6731	46	40.6731	35	40.6731	24	40.6731	43	40.6731	31	40.6731	46
40.6926	29	40.6926	40	40.6926	50	40.6926	39	40.6926	24	40.6926	44	40.6926	35	40.6926	37	40.6926	43	40.6926	61	40.6926	42	40.6926	29	40.6926	38	40.6926	52	40.6926	45
40.712	27	40.712	44	40.712	46	40.712	45	40.712	33	40.712	38	40.712	46	40.712	40	40.712	48	40.712	47	40.712	42	40.712	26	40.712	43	40.712	46	40.712	40
40.7315	23	40.7315	55	40.7315	38	40.7315	48	40.7315	33	40.7315	43	40.7315	40	40.7315	38	40.7315	42	40.7315	52	40.7315	35	40.7315	25	40.7315	38	40.7315	34	40.7315	40
40.751	38	40.751	54	40.751	43	40.751	40	40.751	40	40.751	36	40.751	46	40.751	38	40.751	31	40.751	49	40.751	32	40.751	29	40.751	39	40.751	48	40.751	48
40.7705	26	40.7705	53	40.7705	52	40.7705	57	40.7705	36	40.7705	42	40.7705	32	40.7705	38	40.7705	57	40.7705	49	40.7705	36	40.7705	24	40.7705	43	40.7705	42	40.7705	50
40.79	28	40.79	47	40.79	45	40.79	39	40.79	35	40.79	36	40.79	36	40.79	40	40.79	41	40.79	48	40.79	42	40.79	20	40.79	30	40.79	42	40.79	49
40.8095	37	40.8095	37	40.8095	37	40.8095	39	40.8095	31	40.8095	44	40.8095	43	40.8095	50	40.8095	42	40.8095	50	40.8095	31	40.8095	33	40.8095	32	40.8095	40	40.8095	41
40.829	53	40.829	37	40.829	37	40.829	30	40.829	26	40.829	35	40.829	29	40.829	43	40.829	45	40.829	39	40.829	36	40.829	30	40.829	52	40.829	32	40.829	42
40.8485	31	40.8485	56	40.8485	35	40.8485	37	40.8485	24	40.8485	35	40.8485	44	40.8485	46	40.8485	44	40.8485	47	40.8485	47	40.8485	32	40.8485	35	40.8485	31	40.8485	34
40.868	29	40.868	43	40.868	49	40.868	36	40.868	30	40.868	29	40.868	25	40.868	28	40.868	39	40.868	35	40.868	50	40.868	25	40.868	39	40.868	36	40.868	40
40.8875	25	40.8875	37	40.8875	45	40.8875	38	40.8875	32	40.8875	38	40.8875	27	40.8875	45	40.8875	43	40.8875	41	40.8875	37	40.8875	15	40.8875	36	40.8875	46	40.8875	49
40.907	29	40.907	41	40.907	30	40.907	47	40.907	28	40.907	43	40.907	32	40.907	41	40.907	38	40.907	51	40.907	50	40.907	26	40.907	49	40.907	31	40.907	45
40.9264	33	40.9264	31	40.9264	38	40.9264	43	40.9264	32	40.9264	24	40.9264	29	40.9264	43	40.9264	50	40.9264	47	40.9264	31	40.9264	34	40.9264	47	40.9264	35	40.9264	32
40.9459	26	40.9459	40	40.9459	25	40.9459	34	40.9459	39	40.9459	35	40.9459	29	40.9459	30	40.9459	32	40.9459	37	40.9459	39	40.9459	30	40.9459	40	40.9459	38	40.9459	46
40.9654	29	40.9654	36	40.9654	48	40.9654	34	40.9654	25	40.9654	25	40.9654	39	40.9654	44	40.9654	34	40.9654	42	40.9654	41	40.9654	23	40.9654	32	40.9654	34	40.9654	45
40.9849	33	40.9849	45	40.9849	31	40.9849	45	40.9849	36	40.9849	30	40.9849	36	40.9849	40	40.9849	30	40.9849	49	40.9849	36	40.9849	28	40.9849	47	40.9849	36	40.9849	49
41.0044	28	41.0044	51	41.0044	29	41.0044	32	41.0044	21	41.0044	36	41.0044	33	41.0044	32	41.0044	38	41.0044	42	41.0044	41	41.0044	27	41.0044	29	41.0044	42	41.0044	35
41.0239	27	41.0239	46	41.0239	41	41.0239	37	41.0239	29	41.0239	30	41.0239	34	41.0239	33	41.0239	41	41.0239	52	41.0239	38	41.0239	23	41.0239	37	41.0239	33	41.0239	37
41.0434	32	41.0434	50	41.0434	42	41.0434	45	41.0434	22	41.0434	39	41.0434	42	41.0434	39	41.0434	39	41.0434	44	41.0434	34	41.0434	20	41.0434	31	41.0434	40	41.0434	32
41.0629	23	41.0629	35	41.0629	36	41.0629	53	41.0629	25	41.0629	27	41.0629	34	41.0629	36	41.0629	37	41.0629	22	41.0629	39	41.0629	24	41.0629	42	41.0629	31	41.0629	32
41.0823	28	41.0823	33	41.0823	36	41.0823	30	41.0823	27	41.0823	33	41.0823	27	41.0823	38	41.0823	42	41.0823	48	41.0823	38	41.0823	22	41.0823	44	41.0823	32	41.0823	43
41.1018	27	41.1018	38	41.1018	29	41.1018	33	41.1018	24	41.1018	24	41.1018	42	41.1018	33	41.1018	31	41.1018	41	41.1018	35	41.1018	19	41.1018	29	41.1018	42	41.1018	47
41.1213	24	41.1213	33	41.1213	40	41.1213	36	41.1213	21	41.1213	46	41.1213	33	41.1213	28	41.1213	31	41.1213	35	41.1213	24	41.1213	19	41.1213	40	41.1213	31	41.1213	28
41.1408	34	41.1408	41	41.1408	33	41.1408	39	41.1408	24	41.1408	33	41.1408	36	41.1408	38	41.1408	50	41.1408	39	41.1408	36	41.1408	23	41.1408	47	41.1408	35	41.1408	32
41.1603	23	41.1603	47	41.1603	40	41.1603	37	41.1603	34	41.1603	35	41.1603	36	41.1603	29	41.1603	44	41.1603	54	41.1603	24	41.1603	37	41.1603	41	41.1603	32	41.1603	28
41.1798	25	41.1798	42	41.1798	39	41.1798	47	41.1798	28	41.1798	30	41.1798	34	41.1798	36	41.1798	32	41.1798	37	41.1798	26	41.1798	21	41.1798	34	41.1798	39	41.1798	32
41.1993	26	41.1993	28	41.1993	37	41.1993	32	41.1993	34	41.1993	34	41.1993	32	41.1993	36	41.1993	28	41.1993	41	41.1993	45	41.1993	28	41.1993	35	41.1993	40	41.1993	35
41.2188	28	41.2188	38	41.2188	42	41.2188	32	41.2188	23	41.2188	33	41.2188	25	41.2188	48	41.2188	38	41.2188	36	41.2188	37	41.2188	30	41.2188	38	41.2188	31	41.2188	42
41.2383	26	41.2383	31	41.2383	37	41.2383	29	41.2383	26	41.2383	27	41.2383	24	41.2383	44	41.2383	46	41.2383	46	41.2383	32	41.2383	22	41.2383	35	41.2383	30	41.2383	41
41.2578	30	41.2578	43	41.2578	32	41.2578	29	41.2578	19	41.2578	31	41.2578	30	41.2578	39	41.2578	36	41.2578	35	41.2578	39	41.2578	16	41.2578	21	41.2578	33	41.2578	31
41.2772	30	41.2772	44	41.2772	52	41.2772	39	41.2772	41	41.2772	30	41.2772	32	41.2772	33	41.2772	41	41.2772	36	41.2772	40	41.2772	21	41.2772	43	41.2772	26	41.2772	34
41.2967	30	41.2967	40	41.2967	42	41.2967	44	41.2967	27	41.2967	35	41.2967	35	41.2967	30	41.2967	36	41.2967	44	41.2967	40	41.2967	36	41.2967	40	41.2967	29	41.2967	34
41.3162	25	41.3162	39	41.3162	39	41.3162	36	41.3162	26	41.3162	34	41.3162	48	41.3162	39	41.3162	27	41.3162	36	41.3162	52	41.3162	26	41.3162	35	41.3162	33	41.3162	40
41.3357	28	41.3357	31	41.3357	32	41.3357	35	41.3357	32	41.3357	31	41.3357	29	41.3357	35	41.3357	45	41.3357	32	41.3357	21	41.3357	25	41.3357	43	41.3357	39	41.3357	37
41.3552	28	41.3552	35	41.3552	30	41.3552	53	41.3552	38	41.3552	31	41.3552	31	41.3552	31	41.3552	37	41.3552	40	41.3552	30	41.3552	19	41.3552	38	41.3552	29	41.3552	40
41.3747	29	41.3747	54	41.3747	32	41.3747	35	41.3747	26	41.3747	44	41.3747	31	41.3747	38	41.3747	36	41.3747	34	41.3747	34	41.3747	26	41.3747	33	41.3747	44	41.3747	35
41.3942	23	41.3942	35	41.3942	38	41.3942	33	41.3942	24	41.3942	31	41.3942	28	41.3942	40	41.3942	35	41.3942	37	41.3942	40	41.3942	30	41.3942	26	41.3942	36	41.3942	42
41.4137	44	41.4137	35	41.4137	35	41.4137	42	41.4137	25	41.4137	28	41.4137	41	41.4137	35	41.4137	38	41.4137	50	41.4137	28	41.4137	32	41.4137	43	41.4137	25	41.4137	48
41.4332	34	41.4332	48	41.4332	36	41.4332	49	41.4332	22	41.4332	32	41.4332	21	41.4332	37	41.4332	33	41.4332	35	41.4332	31	41.4332	21	41.4332	35	41.4332	37	41.4332	58
41.4526	27	41.4526	39	41.4526	41	41.4526	32	41.4526	26	41.4526	35	41.4526	35	41.4526	38	41.4526	36	41.4526	44	41.4526	41	41.4526	26	41.4526	42	41.4526	28	41.4526	41
41.4721	29	41.4721	40	41.4721	32	41.4721	38	41.4721	30	41.4721	28	41.4721	28	41.4721	40	41.4721	32	41.4721	48	41.4721	31	41.4721	27	41.4721	46	41.4721	39	41.4721	36
41.4916	35	41.4916	39	41.4916	37	41.4916	50	41.4916	32	41.4916	33	41.4916	36	41.4916	35	41.4916	29	41.4916	44	41.4916	39	41.4916	27	41.4916	42	41.4916	26	41.4916	41
41.5111	34	41.5111	49	41.5111	35	41.5111	44	41.5111	23	41.5111	32	41.5111	33	41.5111	29	41.5111	34	41.5111	45	41.5111	36	41.5111	20	41.5111	34	41.5111	37	41.5111	48
41.5306	31	41.5306	34	41.5306	35	41.5306	43	41.5306	34	41.5306	26	41.5306	24	41.5306	33	41.5306	43	41.5306	28	41.5306	34	41.5306	22	41.5306	43	41.5306	37	41.5306	33
41.5501	26	41.5501	36	41.5501	29	41.5501	32	41.5501	27	41.5501	39	41.5501	29	41.5501	42	41.5501	41	41.5501	36	41.5501	32	41.5501	29	41.5501	35	41.5501	28	41.5501	42
41.5696	26	41.5696	38	41.5696	31	41.5696	30	41.5696	42	41.5696	25	41.5696	35	41.5696	37	41.5696	37	41.5696	39	41.5696	35	41.5696	37	41.5696	32	41.5696	39	41.5696	39
41.5891	34	41.5891	45	41.5891	32	41.5891	48	41.5891	27	41.5891	38	41.5891	32	41.5891	38	41.5891	29	41.5891	46	41.5891	34	41.5891	22	41.5891	32	41.5891	32	41.5891	55
41.6086	38	41.6086	54	41.6086	30	41.6086	45	41.6086	26	41.6086	28	41.6086	35	41.6086	47	41.6086	54	41.6086	42	41.6086	41	41.6086	27	41.6086	37	41.6086	42	41.6086	49
41.6281	34	41.6281	39	41.6281	31	41.6281	47	41.6281	35	41.6281	37	41.6281	36	41.6281	40	41.6281	44	41.6281	56	41.6281	38	41.6281	33	41.6281	48	41.6281	31	41.6281	33
41.6475	23	41.6475	45	41.6475	37	41.6475	35	41.6475	42	41.6475	36	41.6475	23	41.6475	32	41.6475	45	41.6475	48	41.6475	35	41.6475	16	41.6475	50	41.6475	38	41.6475	42
41.667	41	41.667	47	41.667	37	41.667	51	41.667	32	41.667	40	41.667	35	41.667	50	41.667	37	41.667	33	41.667	30	41.667	28	41.667	39	41.667	43	41.667	35
41.6865	30	41.6865	61	41.6865	33	41.6865	40	41.6865	45	41.6865	46	41.6865	30	41.6865	47	41.6865	43	41.6865	42	41.6865	49	41.6865	26	41.6865	36	41.6865	40	41.6865	29
41.706	33	41.706	32	41.706	44	41.706	47	41.706	35	41.706	34	41.706	41	41.706	45	41.706	50	41.706	57	41.706	44	41.706	38	41.706	41	41.706	32	41.706	45
41.7255	37	41.7255	36	41.7255	46	41.7255	56	41.7255	43	41.7255	28	41.7255	33	41.7255	28	41.7255	47	41.7255	43	41.7255	41	41.7255	30	41.7255	47	41.7255	39	41.7255	55
41.745	41	41.745	36	41.745	41	41.745	42	41.745	40	41.745	39	41.745	34	41.745	39	41.745	54	41.745	37	41.745	42	41.745	25	41.745	56	41.745	50	41.745	43
41.7645	34	41.7645	42	41.7645	53	41.7645	42	41.7645	39	41.7645	32	41.7645	50	41.7645	46	41.7645	33	41.7645	40	41.7645	38	41.7645	34	41.7645	51	41.7645	48	41.7645	41
41.784	43	41.784	45	41.784	28	41.784	46	41.784	31	41.784	28	41.784	28	41.784	28	41.784	44	41.784	46	41.784	34	41.784	38	41.784	44	41.784	33	41.784	61
41.8035	36	41.8035	36	41.8035	38	41.8035	39	41.8035	41	41.8035	32	41.8035	33	41.8035	47	41.8035	56	41.8035	51	41.8035	36	41.8035	33	41.8035	48	41.8035	41	41.8035	54
41.8229	47	41.8229	48	41.8229	40	41.8229	41	41.8229	51	41.8229	48	41.8229	42	41.8229	50	41.8229	37	41.8229	52	41.8229	58	41.8229	31	41.8229	51	41.8229	51	41.8229	50
41.8424	52	41.8424	53	41.8424	38	41.8424	38	41.8424	37	41.8424	36	41.8424	42	41.8424	50	41.8424	47	41.8424	39	41.8424	37	41.8424	39	41.8424	44	41.8424	47	41.8424	48
41.8619	34	41.8619	41	41.8619	38	41.8619	53	41.8619	31	41.8619	43	41.8619	38	41.8619	48	41.8619	39	41.8619	63	41.8619	59	41.8619	38	41.8619	45	41.8619	47	41.8619	59
41.8814	39	41.8814	36	41.8814	45	41.8814	52	41.8814	33	41.8814	42	41.8814	32	41.8814	45	41.8814	36	41.8814	48	41.8814	55	41.8814	44	41.8814	55	41.8814	35	41.8814	40
41.9009	45	41.9009	49	41.9009	45	41.9009	55	41.9009	47	41.9009	47	41.9009	31	41.9009	36	41.9009	50	41.9009	42	41.9009	37	41.9009	41	41.9009	54	41.9009	41	41.9009	56
41.9204	58	41.9204	53	41.9204	35	41.9204	44	41.9204	39	41.9204	39	41.9204	40	41.9204	41	41.9204	42	41.9204	51	41.9204	52	41.9204	38	41.9204	56	41.9204	45	41.9204	48
[truncated: 1,441 more rows]
